# Supplementary material for: The relative roles of CO 2 and palaeogeography in determining late Miocene climate: results from a terrestrial model–data comparison
Source: Copernicus journal article supplement (doi:10.5194/cp-8-1257-2012), 2012-08-16
Supplement: Supplementary file 1 [file SupplementaryData.xlsx]

## Sheet: Data
RecordID	Site_Name	ModLat	ModLon	PalLatMin	PalLatMax	PalLonMin	PalLonMax	Method	AgeMin	AgeMax	Epoch	OriginalMATmin	OriginalMATmax	OriginalCMTmin	OriginalCMTmax	OriginalWMTmin	OriginalWMTmax	OriginalMAPmin	OriginalMAPmax	Reference	Reference2	Reference3	AdjustedMATmin	AdjustedMATmax	AdjustedCMTmin	AdjustedCMTmax	AdjustedWMTmin	AdjustedWMTmax	AdjustedMAPmin	AdjustedMAPmax
1	Ampflwang	48.1	13.55	47.766	47.725	12.66	12.556	Co-existence Approach	8.7	9.7	Tortonian	14.7	20.8	4.5	13.3	25.05	29.05	946.5	1346.5	Bruch et al., 2006			14.7	20.8	4.5	13.3	25.05	29.05	946.5	1346.5	Note: some datapoints have been adjusted to allow for calibration error
2	Aubenham	48.3	12.4	48.012	47.83	11.675	11.259	Co-existence Approach	7.1	11.5	Messinian	12.3	16.3	0.1	4.1	22.05	26.05	1034	1434	Bruch et al., 2006			12.3	16.3	0.1	4.1	22.05	26.05	1034	1434
3	Bukkabrany	47.92	20.75	47.787	47.755	20.087	19.937	Co-existence Approach	7.1	11.5	Messinian	13.5	17.5	2.35	6.35	24.9	28.9	897	1355	Bruch et al., 2006	Bruch et al., 2006		13.5	17.5	2.35	6.35	24.9	28.9	897	1355
4	Bulgaria C1	43.87	23.51	43.763	43.717	22.88	22.64	Co-existence Approach	7.1	11.5	Messinian	14.4	18.4	3.8	7.8	24	28	823	1308	Bruch et al., 2006			14.4	18.4	3.8	7.8	24	28	823	1308
5	Delureni	46.97	22.58	46.847	46.766	21.845	21.434	Co-existence Approach	7.1	11.5	Messinian	14.85	18.85	3.4	7.4	25.2	29.2	1039	1439	Bruch et al., 2006			14.85	18.85	3.4	7.4	25.2	29.2	1039	1439
6	Dubona	44.31	20.45	44.151	44.12	19.813	19.696	Co-existence Approach	7.1	11.5	Messinian	12.9	16.9	2.25	6.25	24.6	28.6	979.5	1379.5	Bruch et al., 2006	Pantic, 1956		12.9	16.9	2.25	6.25	24.6	28.6	979.5	1379.5
7	Durinci	44.52	20.75	44.366	44.269	20.105	19.748	Co-existence Approach	7.1	11.5	Messinian	14.05	18.05	1.3	5.3	24.05	28.05	920	1320	Bruch et al., 2006			14.05	18.05	1.3	5.3	24.05	28.05	920	1320
8	Frechen	50.89	6.75	50.406	50.271	5.758	5.513	Co-existence Approach	7.1	11.5	Messinian	12.75	16.75	0.55	4.55	24.25	28.25	1079	1479	Bruch et al., 2006			12.75	16.75	0.55	4.55	24.25	28.25	1079	1479
9	Grossenreith	48.16	13.36	47.822	47.726	12.469	12.242	Co-existence Approach	7.1	11.5	Messinian	12.7	16.7	0.35	4.35	24.35	28.35	719	1119	Bruch et al., 2006			12.7	16.7	0.35	4.35	24.35	28.35	719	1119
10	Hambach Lignite Mine	50.917	6.417	50.526	50.426	5.621	5.427	Co-existence Approach	7.25	9	Tortonian	13.1	17.1	4.3	8.3	23.75	27.75	1040.5	1440.5	Kvacek et al., 2002a	Bruch et al., 2006		13.1	17.1	4.3	8.3	23.75	27.75	1040.5	1440.5
11	Hidas 53	46.166	18.513	45.974	45.854	17.82	17.435	Co-existence Approach	7.1	11.5	Messinian	11.6	18.4	4.6	8.6	24.2	28.2	1042.5	1442.5	Bruch et al., 2006	Nagy, 1967		11.6	18.4	4.6	8.6	24.2	28.2	1042.5	1442.5
12	Hoktemberyan 5	40.18	44.15	40.516	40.604	43.456	43.292	Co-existence Approach	7.1	11.5	Messinian	15	19	4.35	8.35	24.75	28.75	904.5	1304.5	Bruch et al., 2006			15	19	4.35	8.35	24.75	28.75	904.5	1304.5
13	Klettwitz 12	51.55	13.9	51.355	51.113	13.26	12.534	Co-existence Approach	7.1	11.5	Messinian	14	18	3.45	7.45	23.7	27.7	967	1367	Bruch et al., 2006			14	18	3.45	7.45	23.7	27.7	967	1367
14	Laaerberg	48.17	16.27	47.94	47.879	15.514	15.328	Co-existence Approach	7.1	11.5	Messinian	12.5	16.5	-0.5	5.1	24	28	842	1242	Bruch et al., 2006			12.5	16.5	-0.5	5.1	24	28	842	1242
15	Leonberg	48.25	12.9	47.86	47.804	11.904	11.782	Co-existence Approach	7.1	11.5	Messinian	14	18	2.9	7.6	21.95	25.95	735	1475	Bruch et al., 2006			14	18	2.9	7.6	21.95	25.95	735	1475
16	Lohnsburg	48.15	13.42	47.813	47.718	12.529	12.302	Co-existence Approach	7.1	11.5	Messinian	12.55	16.55	0.35	4.35	24.05	28.05	734	1134	Bruch et al., 2006			12.55	16.55	0.35	4.35	24.05	28.05	734	1134
17	Makrilia	35	25.7	34.389	34.318	25.405	25.371	Co-existence Approach	7.1	11.5	Messinian	14.8	18.8	6.65	10.65	24.55	28.55	788.5	1188.5	Bruch et al., 2006			14.8	18.8	6.65	10.65	24.55	28.55	788.5	1188.5
18	Moravian Basin	48.7	17.05	48.483	48.347	16.27	15.836	Co-existence Approach	7.1	11.5	Messinian	14.05	18.05	3.7	7.7	24.05	28.05	897	1297	Bruch et al., 2006			14.05	18.05	3.7	7.7	24.05	28.05	897	1297
19	Neuhaus	46.93	16.08	46.702	46.636	15.385	15.195	Co-existence Approach	7.1	11.5	Messinian	13.7	17.7	0.6	5.8	23.85	27.85	1093	1493	Bruch et al., 2006			13.7	17.7	0.6	5.8	23.85	27.85	1093	1493
20	Neusiedl	47.92	15.83	47.682	47.536	15.085	14.672	Co-existence Approach	7.1	11.5	Messinian	12.9	16.9	0.1	5.2	23.55	27.55	897	1355	Bruch et al., 2006			12.9	16.9	0.1	5.2	23.55	27.55	897	1355
21	Nitra	48.19	18.05	47.994	47.867	17.301	16.868	Co-existence Approach	7.1	11.5	Messinian	13.45	17.45	5.05	9.05	22.8	26.8	855.5	1255.5	Bruch et al., 2006			13.45	17.45	5.05	9.05	22.8	26.8	855.5	1255.5
22	Oas Basin	47.5	23.25	47.391	47.356	22.509	22.306	Co-existence Approach	7.1	11.5	Messinian	12.8	16.8	0.1	7	24.05	28.05	867	1356	Bruch et al., 2006			12.8	16.8	0.1	7	24.05	28.05	867	1356
23	Rozsaszentmarton	47.75	19.75	47.578	47.47	18.995	18.574	Co-existence Approach	7.1	11.5	Messinian	13.6	17.6	4	8	22.8	26.8	824	1224	Bruch et al., 2006			13.6	17.6	4	8	22.8	26.8	824	1224
24	Schneegattern	48.04	13.32	47.701	47.605	12.434	12.209	Co-existence Approach	7.1	11.5	Messinian	12.75	16.75	0.1	4.5	24.75	28.75	967	1367	Bruch et al., 2006			12.75	16.75	0.1	4.5	24.75	28.75	967	1367
25	Triopetra	35.11	24.54	34.527	34.386	24.269	24.204	Co-existence Approach	7.1	11.5	Messinian	15	19	5	9.4	24.25	28.25	547	947	Bruch et al., 2006			15	19	5	9.4	24.25	28.25	547	947
26	Visonta	47.75	20.02	47.583	47.477	19.264	18.842	Co-existence Approach	7.1	11.5	Messinian	12.55	16.55	0	5.1	23.6	27.6	851.5	1251.5	Bruch et al., 2006			12.55	16.55	0	5.1	23.6	27.6	851.5	1251.5
27	Vösendorf	48.07	16.33	47.791	47.696	15.424	15.151	Relative abundance of arctotertiary and palaeotropic elements in a fossil flora	8.7	11.7	Tortonian	11.85	17.85	0.95	6.95	22.1	30.1	866	1266	Mai, 1995	Bruch et al., 2006		11.85	17.85	0.95	6.95	22.1	30.1	866	1266
28	Wien E-F	48.8	16.65	48.576	48.437	15.868	15.433	Co-existence Approach	7.1	11.5	Messinian	14.1	18.1	2.65	6.65	23.6	27.6	1093	1493	Bruch et al., 2006			14.1	18.1	2.65	6.65	23.6	27.6	1093	1493
29	Eppelsheim	49.72	8.97	49.244	49.176	7.936	7.809	Mammal tooth-crown height	9.7	11.1	Tortonian							1551	2327	Eronen et al., 2010									1551	2327
30	Can Llobateres I	41.2	0.7	40.556	40.467	0.11	0.023	Mammal tooth-crown height	9.7	11.1	Tortonian							1551	2327	Eronen et al., 2010									1551	2327
31	Can Ponsic	41.2	0.7	40.556	40.467	0.11	0.023	Mammal tooth-crown height	9.7	11.1	Tortonian							1017	1793	Eronen et al., 2010									1017	1793
32	Los Valles de Fuentidueña	41	-4.2	40.26	40.156	-4.731	-4.809	Mammal tooth-crown height	9.7	11.1	Tortonian							1017	1793	Eronen et al., 2010									1017	1793
33	Samos	37.75	26.97	37.709	37.698	26.56	26.47	Mammal tooth-crown height	7.25	7.75	Tortonian							1017	1793	Eronen et al., 2010									1017	1793
34	Maragheh	37.4	46.33	37.659	37.712	45.954	45.869	Mammal tooth-crown height	7.25	7.75	Tortonian							11.7	787.7	Eronen et al., 2010									11.7	787.7
35	Pikermi	38.01	23.99	37.476	37.362	23.718	23.662	Mammal tooth-crown height	7.25	7.75	Tortonian							1551	2327	Eronen et al., 2010									1551	2327
36	Can Missert	41.2	0.5	40.552	40.463	-0.088	-0.175	Mammal tooth-crown height	9.7	11.1	Tortonian							345.1	1121.1	Eronen et al., 2010									345.1	1121.1
37	Santiga	41.2	0.5	40.552	40.463	-0.088	-0.175	Mammal tooth-crown height	9.7	11.1	Tortonian							1017	1793	Eronen et al., 2010									1017	1793
38	Can Purull	41.55	1.97	40.997	40.931	1.42	1.355	Mammal tooth-crown height	8.7	9.7	Tortonian							1017	1793	Eronen et al., 2010									1017	1793
39	Masa del Barbo	40.4	-1.1	39.792	39.72	-1.587	-1.644	Mammal tooth-crown height	8.7	9.7	Tortonian							293.6	1069.6	Eronen et al., 2010									293.6	1069.6
40	Piera	41.2	0.5	40.669	40.621	0.017	-0.026	Mammal tooth-crown height	7.75	8.7	Tortonian							1017	1793	Eronen et al., 2010									1017	1793
41	La Cantera	40.06	-1.01	39.454	39.382	-1.487	-1.544	Mammal tooth-crown height	8.7	9.7	Tortonian							11.7	787.7	Eronen et al., 2010									11.7	787.7
42	Crevillente 2	38.4	-0.5	37.853	37.804	-0.898	-0.933	Mammal tooth-crown height	7.75	8.7	Tortonian							1017	1793	Eronen et al., 2010									1017	1793
43	Los Mansuetos	40.4	-1.1	39.943	39.843	-1.468	-1.547	Mammal tooth-crown height	7.25	7.75	Tortonian							1017	1793	Eronen et al., 2010									1017	1793
44	Concud	40.4	-1.13	39.943	39.842	-1.498	-1.577	Mammal tooth-crown height	7.25	7.75	Tortonian							1017	1793	Eronen et al., 2010									1017	1793
45	Casa del Acero	38.1	-0.5	37.651	37.553	-0.821	-0.89	Mammal tooth-crown height	7.25	7.75	Tortonian							11.7	787.7	Eronen et al., 2010									11.7	787.7
46	Ballestar	40.4	0.11	39.744	39.654	-0.446	-0.529	Mammal tooth-crown height	9.7	11.1	Tortonian							1017	1793	Eronen et al., 2010									1017	1793
47	Venta del Moro	39.4	-0.4	39.07	38.953	-0.659	-0.75	Mammal tooth-crown height	4.9	7.25	Messinian							293.6	1069.6	Eronen et al., 2010									293.6	1069.6
48	Librilla	38	-0.6	37.668	37.55	-0.835	-0.918	Mammal tooth-crown height	4.9	7.25	Messinian							0	588.9	Eronen et al., 2010									0	588.9
49	La Alberca	38	-0.6	37.668	37.55	-0.835	-0.918	Mammal tooth-crown height	4.9	7.25	Messinian							293.6	1069.6	Eronen et al., 2010									293.6	1069.6
50	El Arquillo 1	40.35	-1.05	40.014	39.894	-1.322	-1.417	Mammal tooth-crown height	4.9	7.25	Messinian							293.6	1069.6	Eronen et al., 2010									293.6	1069.6
51	Villastar	40.2833	-1.15	39.946	39.826	-1.42	-1.515	Mammal tooth-crown height	4.9	7.25	Messinian							0	588.9	Eronen et al., 2010									0	588.9
52	Almenara-Casablanca M	40	0	39.674	39.558	-0.271	-0.366	Mammal tooth-crown height	4.9	7.25	Messinian							345.1	1121.1	Eronen et al., 2010									345.1	1121.1
53	Montredon	44.4	3.36	43.872	43.809	2.701	2.624	Mammal tooth-crown height	8.7	9.7	Tortonian							293.6	1069.6	Eronen et al., 2010									293.6	1069.6
54	Nombrevilla	41.07	-1.21	40.388	40.293	-1.776	-1.86	Mammal tooth-crown height	9.7	11.1	Tortonian							1017	1793	Eronen et al., 2010									1017	1793
55	Puente Minero	40.36	-1.08	39.803	39.753	-1.526	-1.566	Mammal tooth-crown height	7.75	8.7	Tortonian							11.7	787.7	Eronen et al., 2010									11.7	787.7
56	Kohfidisch	47.16	16.35	46.882	46.848	15.484	15.382	Mammal tooth-crown height	8.7	9.7	Tortonian							1017	1793	Eronen et al., 2010									1017	1793
57	Ravin des Zouaves 1	41	22.95	40.858	40.84	22.3	22.223	Mammal tooth-crown height	8.7	9.7	Tortonian							0	588.9	Eronen et al., 2010									0	588.9
58	Brisighella	44.5	11.6	44.056	43.901	11.434	11.377	Mammal tooth-crown height	4.9	7.25	Messinian							293.6	1069.6	Eronen et al., 2010									293.6	1069.6
59	Mt. Luberon	43.7	5.4	43.332	43.251	4.907	4.801	Mammal tooth-crown height	7.25	7.75	Tortonian							293.6	1069.6	Eronen et al., 2010									293.6	1069.6
60	Doué-la-Fontaine	47.2	-0.3	46.534	46.439	-1.109	-1.204	Mammal tooth-crown height	9.7	11.1	Tortonian							345.1	1121.1	Eronen et al., 2010									345.1	1121.1
61	Soblay	45.1	5.5	44.611	44.553	4.796	4.714	Mammal tooth-crown height	8.7	9.7	Tortonian							293.6	1069.6	Eronen et al., 2010									293.6	1069.6
62	Priay II	46	5.3	45.448	45.37	4.478	4.38	Mammal tooth-crown height	9.7	11.1	Tortonian							345.1	1121.1	Eronen et al., 2010									345.1	1121.1
63	Kalmakpaj	47.3	85.3	47.85	48.042	85.104	85.029	Mammal tooth-crown height	4.9	7.25	Messinian							293.6	1069.6	Eronen et al., 2010									293.6	1069.6
64	La Tarumba I	41.55	1.97	40.997	40.931	1.42	1.355	Mammal tooth-crown height	8.7	9.7	Tortonian							1017	1793	Eronen et al., 2010									1017	1793
65	Terrassa	41.56	2	41.008	40.942	1.449	1.384	Mammal tooth-crown height	8.7	9.7	Tortonian							1551	2327	Eronen et al., 2010									1551	2327
66	Seu d'Urgel	42.3	1.6	41.674	41.588	0.962	0.867	Mammal tooth-crown height	9.7	11.1	Tortonian							345.1	1121.1	Eronen et al., 2010									345.1	1121.1
67	Ananjev	47.7	30	47.705	47.704	29.482	29.297	Mammal tooth-crown height	4.9	7.25	Messinian							345.1	1121.1	Eronen et al., 2010									345.1	1121.1
68	Arkneti	42.13	43.51	42.389	42.411	42.89	42.833	Mammal tooth-crown height	7.75	8.7	Tortonian							345.1	1121.1	Eronen et al., 2010									345.1	1121.1
69	Bazaleti	41.9	45	42.078	42.138	44.636	44.504	Mammal tooth-crown height	4.9	7.25	Messinian							293.6	1069.6	Eronen et al., 2010									293.6	1069.6
70	Belka	50.81	28.18	50.785	50.777	27.364	27.187	Mammal tooth-crown height	7.25	7.75	Tortonian							345.1	1121.1	Eronen et al., 2010									345.1	1121.1
71	Buzhor 1	46.56	28.16	46.517	46.51	27.176	27.053	Mammal tooth-crown height	9.7	11.1	Tortonian							11.7	787.7	Eronen et al., 2010									11.7	787.7
72	Bled Douarah	34	8	33.097	32.957	7.79	7.759	Mammal tooth-crown height	9.7	11.1	Tortonian							345.1	1121.1	Eronen et al., 2010									345.1	1121.1
73	Bou Hanifia	35.3	-0.1	34.368	34.224	-0.204	-0.22	Mammal tooth-crown height	9.7	11.1	Tortonian							293.6	1069.6	Eronen et al., 2010									293.6	1069.6
74	Douaria	35	10	34.55	34.393	9.878	9.836	Mammal tooth-crown height	4.9	7.25	Messinian							345.1	1121.1	Eronen et al., 2010									345.1	1121.1
75	Ebic	38.8	35.65	38.895	38.913	35.215	35.119	Mammal tooth-crown height	7.25	7.75	Tortonian							345.1	1121.1	Eronen et al., 2010									345.1	1121.1
76	Injana	34.33	44.66	32.882	32.75	44.286	44.254	Mammal tooth-crown height	7.75	8.7	Tortonian							293.6	1069.6	Eronen et al., 2010									293.6	1069.6
77	Djebel Krechem el Artsouma	34	9	33.26	33.195	8.818	8.802	Mammal tooth-crown height	7.75	8.7	Tortonian							11.7	787.7	Eronen et al., 2010									11.7	787.7
78	Gura-Galben	46.42	28.42	46.4	46.393	27.761	27.618	Mammal tooth-crown height	7.25	7.75	Tortonian							11.7	787.7	Eronen et al., 2010									11.7	787.7
79	Isakovo	47.22	28.43	47.183	47.176	27.413	27.285	Mammal tooth-crown height	9.7	11.1	Tortonian							11.7	787.7	Eronen et al., 2010									11.7	787.7
80	Lapushna	46.9	28.5	46.865	46.858	27.498	27.374	Mammal tooth-crown height	9.7	11.1	Tortonian							345.1	1121.1	Eronen et al., 2010									345.1	1121.1
81	Lassnitz	47.1	15.6	46.882	46.832	14.951	14.811	Mammal tooth-crown height	7.25	7.75	Tortonian							345.1	1121.1	Eronen et al., 2010									345.1	1121.1
82	Maramena	41.29	23.81	41.225	41.199	23.442	23.311	Mammal tooth-crown height	4.9	7.25	Messinian							293.6	1069.6	Eronen et al., 2010									293.6	1069.6
83	Mistelbach	48.6	16.5	48.29	48.245	15.46	15.331	Mammal tooth-crown height	9.7	11.1	Tortonian							345.1	1121.1	Eronen et al., 2010									345.1	1121.1
84	Novaja Emetovka	46.65	30.6	46.664	46.664	29.788	29.714	Mammal tooth-crown height	7.75	8.7	Tortonian							293.6	1069.6	Eronen et al., 2010									293.6	1069.6
85	Novo-Elizavetovka 2	47	31	47.022	47.022	30.173	30.099	Mammal tooth-crown height	7.75	8.7	Tortonian							345.1	1121.1	Eronen et al., 2010									345.1	1121.1
86	Novoukrainka	48.3	31.5	48.332	48.334	30.539	30.425	Mammal tooth-crown height	8.7	9.7	Tortonian							345.1	1121.1	Eronen et al., 2010									345.1	1121.1
87	Oberhollabrunn	48.55	16.06	48.23	48.184	15.025	14.897	Mammal tooth-crown height	9.7	11.1	Tortonian							345.1	1121.1	Eronen et al., 2010									345.1	1121.1
88	Respopeny	47.45	28.36	47.417	47.412	27.44	27.331	Mammal tooth-crown height	8.7	9.7	Tortonian							11.7	787.7	Eronen et al., 2010									11.7	787.7
89	Himberg	48.1	16.5	47.79	47.746	15.485	15.36	Mammal tooth-crown height	9.7	11.1	Tortonian							345.1	1121.1	Eronen et al., 2010									345.1	1121.1
90	Halmyropotamos (HAL)	38.5	24.2	37.967	37.854	23.922	23.864	Mammal tooth-crown height	7.25	7.75	Tortonian							1017	1793	Eronen et al., 2010									1017	1793
91	Baccinello V2	42.7	11.1	42.099	41.972	10.895	10.853	Mammal tooth-crown height	7.25	7.75	Tortonian							345.1	1121.1	Eronen et al., 2010									345.1	1121.1
92	Baccinello V3	42.7	11.1	42.254	42.099	10.947	10.895	Mammal tooth-crown height	4.9	7.25	Messinian							11.7	787.7	Eronen et al., 2010									11.7	787.7
93	Baccinello V1	42.7	11.1	42.099	41.972	10.895	10.853	Mammal tooth-crown height	7.25	7.75	Tortonian							293.6	1069.6	Eronen et al., 2010									293.6	1069.6
94	Baccinello V0	42.7	11.1	41.972	41.908	10.853	10.832	Mammal tooth-crown height	7.75	8.7	Tortonian							345.1	1121.1	Eronen et al., 2010									345.1	1121.1
95	Middle Sinap	40.56	32.7	40.625	40.633	31.979	31.893	Mammal tooth-crown height	9.7	11.1	Tortonian							345.1	1121.1	Eronen et al., 2010									345.1	1121.1
96	Çobanpinar (Sinap 42)	40.21	32.53	40.256	40.263	32.055	31.951	Mammal tooth-crown height	7.25	7.75	Tortonian							293.6	1069.6	Eronen et al., 2010									293.6	1069.6
97	Esme Akçaköy	38.4	28.96	38.38	38.376	28.323	28.249	Mammal tooth-crown height	9.7	11.1	Tortonian							1017	1793	Eronen et al., 2010									1017	1793
98	Kayadibi	37.21	30.8	37.231	37.232	30.314	30.27	Mammal tooth-crown height	7.75	8.7	Tortonian							1017	1793	Eronen et al., 2010									1017	1793
99	Gülpinar	39.53	26.11	39.454	39.444	25.506	25.434	Mammal tooth-crown height	8.7	9.7	Tortonian							293.6	1069.6	Eronen et al., 2010									293.6	1069.6
100	Küçükçekmece	40.98	28.76	40.961	40.958	28.156	28.101	Mammal tooth-crown height	7.75	8.7	Tortonian							1017	1793	Eronen et al., 2010									1017	1793
101	Eski Bayirköy	37.26	28.26	37.24	37.233	27.861	27.774	Mammal tooth-crown height	7.25	7.75	Tortonian							293.6	1069.6	Eronen et al., 2010									293.6	1069.6
102	Mahmutgazi	38.02	29.4	38.017	38.014	28.982	28.89	Mammal tooth-crown height	7.25	7.75	Tortonian							345.1	1121.1	Eronen et al., 2010									345.1	1121.1
103	Massenhausen	48.4	11.8	47.986	47.927	10.806	10.684	Mammal tooth-crown height	9.7	11.1	Tortonian							1551	2327	Eronen et al., 2010									1551	2327
104	Gau-Weinheim	49.84	8.04	49.344	49.273	7.01	6.883	Mammal tooth-crown height	9.7	11.1	Tortonian							345.1	1121.1	Eronen et al., 2010									345.1	1121.1
105	Esselborn	49.7	8.1	49.206	49.135	7.076	6.951	Mammal tooth-crown height	9.7	11.1	Tortonian							1017	1793	Eronen et al., 2010									1017	1793
106	Höwenegg	47.7	8.7	47.219	47.151	7.767	7.654	Mammal tooth-crown height	9.7	11.1	Tortonian							11.7	787.7	Eronen et al., 2010									11.7	787.7
107	Melchingen	48.36	9.15	47.889	47.821	8.182	8.064	Mammal tooth-crown height	9.7	11.1	Tortonian							345.1	1121.1	Eronen et al., 2010									345.1	1121.1
108	München	48.2	11.5	47.78	47.72	10.518	10.398	Mammal tooth-crown height	9.7	11.1	Tortonian							345.1	1121.1	Eronen et al., 2010									345.1	1121.1
109	Oberföhring	48.1	11.38	47.677	47.617	10.404	10.285	Mammal tooth-crown height	9.7	11.1	Tortonian							345.1	1121.1	Eronen et al., 2010									345.1	1121.1
110	Wartenberg	48.4	11.98	47.99	47.931	10.984	10.862	Mammal tooth-crown height	9.7	11.1	Tortonian							1017	1793	Eronen et al., 2010									1017	1793
111	Wien-Belvedere	48.2	16.4	47.888	47.843	15.381	15.255	Mammal tooth-crown height	9.7	11.1	Tortonian							345.1	1121.1	Eronen et al., 2010									345.1	1121.1
112	Salmendingen	48.35	9.1	47.878	47.81	8.133	8.015	Mammal tooth-crown height	9.7	11.1	Tortonian							345.1	1121.1	Eronen et al., 2010									345.1	1121.1
113	Polgardi	47	18.3	46.871	46.823	17.815	17.643	Mammal tooth-crown height	4.9	7.25	Messinian							345.1	1121.1	Eronen et al., 2010									345.1	1121.1
114	Dorn Dürkheim 1	49.77	8.26	49.369	49.332	7.413	7.338	Mammal tooth-crown height	7.75	8.7	Tortonian							1551	2327	Eronen et al., 2010									1551	2327
115	Monte Bamboli	43.2	10.7	42.598	42.47	10.496	10.453	Mammal tooth-crown height	7.25	7.75	Tortonian							11.7	787.7	Eronen et al., 2010									11.7	787.7
116	Casteani	42.5	11.15	41.9	41.772	10.946	10.904	Mammal tooth-crown height	7.25	7.75	Tortonian							11.7	787.7	Eronen et al., 2010									11.7	787.7
117	Montemassi	42.9	11	42.299	42.171	10.795	10.752	Mammal tooth-crown height	7.25	7.75	Tortonian							0	588.9	Eronen et al., 2010									0	588.9
118	Ribolla	43	11.1	42.399	42.272	10.893	10.85	Mammal tooth-crown height	7.25	7.75	Tortonian							0	588.9	Eronen et al., 2010									0	588.9
119	Gravitelli	38.2	15.5	37.769	37.619	15.344	15.291	Mammal tooth-crown height	4.9	7.25	Messinian							345.1	1121.1	Eronen et al., 2010									345.1	1121.1
120	Casino	43.5	11.2	43.055	42.9	11.042	10.988	Mammal tooth-crown height	4.9	7.25	Messinian							293.6	1069.6	Eronen et al., 2010									293.6	1069.6
121	Mariathal	48.6	16.1	48.281	48.235	15.062	14.934	Mammal tooth-crown height	9.7	11.1	Tortonian							0	588.9	Eronen et al., 2010									0	588.9
122	Wissberg	49.85	8.02	49.354	49.283	6.989	6.863	Mammal tooth-crown height	9.7	11.1	Tortonian							1551	2327	Eronen et al., 2010									1551	2327
123	Götzendorf	48	16.58	47.692	47.648	15.57	15.445	Mammal tooth-crown height	9.7	11.1	Tortonian							345.1	1121.1	Eronen et al., 2010									345.1	1121.1
124	Sevastopol (Sebastopol)	44.5	33.6	44.584	44.594	32.712	32.602	Mammal tooth-crown height	9.7	11.1	Tortonian							11.7	787.7	Eronen et al., 2010									11.7	787.7
125	Rudabánya	48.71	20.63	48.493	48.461	19.56	19.427	Mammal tooth-crown height	9.7	11.1	Tortonian							1551	2327	Eronen et al., 2010									1551	2327
126	Hatvan	47.66	19.68	47.547	47.504	19.175	18.997	Mammal tooth-crown height	4.9	7.25	Messinian							345.1	1121.1	Eronen et al., 2010									345.1	1121.1
127	Baltavar	47	17	46.803	46.758	16.348	16.208	Mammal tooth-crown height	7.25	7.75	Tortonian							1017	1793	Eronen et al., 2010									1017	1793
128	Grebeniki	46.88	29.81	46.878	46.875	28.914	28.808	Mammal tooth-crown height	8.7	9.7	Tortonian							293.6	1069.6	Eronen et al., 2010									293.6	1069.6
129	Titov Veles	41.71	21.77	41.621	41.588	21.396	21.263	Mammal tooth-crown height	4.9	7.25	Messinian							345.1	1121.1	Eronen et al., 2010									345.1	1121.1
130	Kalimanci 2	42.5	23.1	42.398	42.374	22.568	22.453	Mammal tooth-crown height	7.25	7.75	Tortonian							293.6	1069.6	Eronen et al., 2010									293.6	1069.6
131	Kromidovo 2	41.45	23.36	41.352	41.329	22.857	22.748	Mammal tooth-crown height	7.25	7.75	Tortonian							0	588.9	Eronen et al., 2010									0	588.9
132	Gorna Susica	41.83	23.08	41.728	41.703	22.567	22.456	Mammal tooth-crown height	7.25	7.75	Tortonian							293.6	1069.6	Eronen et al., 2010									293.6	1069.6
133	Ravin de la Pluie (RPL)	41	22.95	40.858	40.84	22.3	22.223	Mammal tooth-crown height	8.7	9.7	Tortonian							11.7	787.7	Eronen et al., 2010									11.7	787.7
134	Xirochori 1 (XIR)	41	23	40.86	40.842	22.35	22.273	Mammal tooth-crown height	8.7	9.7	Tortonian							345.1	1121.1	Eronen et al., 2010									345.1	1121.1
135	Udabno I	41.31	45.23	41.661	41.709	44.513	44.426	Mammal tooth-crown height	9.7	11.1	Tortonian							345.1	1121.1	Eronen et al., 2010									345.1	1121.1
136	Pyrgos Vassilissis	38.01	23.73	37.36	37.303	23.404	23.376	Mammal tooth-crown height	7.75	8.7	Tortonian							345.1	1121.1	Eronen et al., 2010									345.1	1121.1
137	Ravin des Zouaves 5	41	22.95	40.871	40.858	22.354	22.3	Mammal tooth-crown height	7.75	8.7	Tortonian							1017	1793	Eronen et al., 2010									1017	1793
138	Chobruchi (Tchobroutchi)	46.6	29.7	46.6	46.597	29.035	28.89	Mammal tooth-crown height	7.25	7.75	Tortonian							293.6	1069.6	Eronen et al., 2010									293.6	1069.6
139	Varnitsa	47.2	28.9	47.174	47.169	27.883	27.756	Mammal tooth-crown height	9.7	11.1	Tortonian							11.7	787.7	Eronen et al., 2010									11.7	787.7
140	Westhofen	49.55	8.25	49.059	48.989	7.232	7.108	Mammal tooth-crown height	9.7	11.1	Tortonian							345.1	1121.1	Eronen et al., 2010									345.1	1121.1
141	Wien 3	48.2	16.4	47.888	47.843	15.381	15.255	Mammal tooth-crown height	9.7	11.1	Tortonian							345.1	1121.1	Eronen et al., 2010									345.1	1121.1
142	Wien 10	48.2	16.4	47.888	47.843	15.381	15.255	Mammal tooth-crown height	9.7	11.1	Tortonian							345.1	1121.1	Eronen et al., 2010									345.1	1121.1
143	Wien 12	48.2	16.3	47.886	47.84	15.281	15.156	Mammal tooth-crown height	9.7	11.1	Tortonian							345.1	1121.1	Eronen et al., 2010									345.1	1121.1
144	Zistersdorf	48.5	16.7	48.195	48.15	15.664	15.535	Mammal tooth-crown height	9.7	11.1	Tortonian							345.1	1121.1	Eronen et al., 2010									345.1	1121.1
145	Giggenhausen	48.22	11.39	47.797	47.737	10.408	10.288	Mammal tooth-crown height	9.7	11.1	Tortonian							345.1	1121.1	Eronen et al., 2010									345.1	1121.1
146	Nebelbergweg	47.38	7.63	46.877	46.805	6.723	6.613	Mammal tooth-crown height	9.7	11.1	Tortonian							345.1	1121.1	Eronen et al., 2010									345.1	1121.1
147	La Roma 2	40.29	-1	39.684	39.612	-1.484	-1.541	Mammal tooth-crown height	8.7	9.7	Tortonian							293.6	1069.6	Eronen et al., 2010									293.6	1069.6
148	Milagros	41.35	-3.41	40.99	40.862	-3.687	-3.783	Mammal tooth-crown height	4.9	7.25	Messinian							293.6	1069.6	Eronen et al., 2010									293.6	1069.6
149	Molayan	34.31	69.41	34.886	35.008	69.219	69.173	Mammal tooth-crown height	7.25	7.75	Tortonian							1017	1793	Eronen et al., 2010									1017	1793
150	Kalfa	46.54	29.23	46.522	46.518	28.245	28.123	Mammal tooth-crown height	9.7	11.1	Tortonian							1017	1793	Eronen et al., 2010									1017	1793
151	Grosslappen (Flinz)	48.2	11.6	47.782	47.722	10.617	10.497	Mammal tooth-crown height	9.7	11.1	Tortonian							345.1	1121.1	Eronen et al., 2010									345.1	1121.1
152	Hammerschmiede	47.9	10.61	47.461	47.398	9.65	9.533	Mammal tooth-crown height	9.7	11.1	Tortonian							345.1	1121.1	Eronen et al., 2010									345.1	1121.1
153	Breitenbrunn	49	11.6	48.582	48.521	10.578	10.452	Mammal tooth-crown height	9.7	11.1	Tortonian							345.1	1121.1	Eronen et al., 2010									345.1	1121.1
154	Charmoille	47.43	7.21	46.918	46.845	6.305	6.196	Mammal tooth-crown height	9.7	11.1	Tortonian							1017	1793	Eronen et al., 2010									1017	1793
155	Vösendorf	48.07	16.33	47.757	47.711	15.318	15.193	Mammal tooth-crown height	9.7	11.1	Tortonian							1017	1793	Eronen et al., 2010									1017	1793
156	Berislav	46.83	33.42	46.902	46.909	32.527	32.421	Mammal tooth-crown height	8.7	9.7	Tortonian							345.1	1121.1	Eronen et al., 2010									345.1	1121.1
157	Eldari I	41.3	45.7	41.661	41.71	44.986	44.899	Mammal tooth-crown height	9.7	11.1	Tortonian							1017	1793	Eronen et al., 2010									1017	1793
158	Grossulovo	47.35	30	47.351	47.349	29.083	28.975	Mammal tooth-crown height	8.7	9.7	Tortonian							293.6	1069.6	Eronen et al., 2010									293.6	1069.6
159	Stratzing	48.45	15.6	48.156	48.12	14.681	14.573	Mammal tooth-crown height	8.7	9.7	Tortonian							11.7	787.7	Eronen et al., 2010									11.7	787.7
160	Taraklia	46.5	29	46.489	46.484	28.338	28.194	Mammal tooth-crown height	7.25	7.75	Tortonian							293.6	1069.6	Eronen et al., 2010									293.6	1069.6
161	Kerassia	38.5	23	37.96	37.845	22.731	22.675	Mammal tooth-crown height	7.25	7.75	Tortonian							345.1	1121.1	Eronen et al., 2010									345.1	1121.1
162	Tudorovo	46.26	30.03	46.265	46.264	29.376	29.233	Mammal tooth-crown height	7.25	7.75	Tortonian							345.1	1121.1	Eronen et al., 2010									345.1	1121.1
163	Csákvár	47.4	18.5	47.186	47.165	17.685	17.612	Mammal tooth-crown height	7.75	8.7	Tortonian							11.7	787.7	Eronen et al., 2010									11.7	787.7
164	Gaiselberg	48.53	16.71	48.225	48.181	15.672	15.544	Mammal tooth-crown height	9.7	11.1	Tortonian							345.1	1121.1	Eronen et al., 2010									345.1	1121.1
165	Nikiti 1 (NKT)	40	23.5	39.882	39.87	22.935	22.884	Mammal tooth-crown height	7.75	8.7	Tortonian							293.6	1069.6	Eronen et al., 2010									293.6	1069.6
166	Saint Arnaud	36.08	5.4	35.619	35.459	5.313	5.283	Mammal tooth-crown height	4.9	7.25	Messinian							0	588.9	Eronen et al., 2010									0	588.9
167	Sahabi	30.08	20.75	29.67	29.528	20.602	20.552	Mammal tooth-crown height	4.9	7.25	Messinian							11.7	787.7	Eronen et al., 2010									11.7	787.7
168	Middle Maragheh	37.4	46.36	37.659	37.713	45.984	45.899	Mammal tooth-crown height	7.25	7.75	Tortonian							293.6	1069.6	Eronen et al., 2010									293.6	1069.6
169	Lower Maragheh	37.41	46.35	37.723	37.749	45.889	45.846	Mammal tooth-crown height	7.75	8.7	Tortonian							293.6	1069.6	Eronen et al., 2010									293.6	1069.6
170	Prochoma	41	22.93	40.896	40.871	22.44	22.334	Mammal tooth-crown height	7.25	7.75	Tortonian							1017	1793	Eronen et al., 2010									1017	1793
171	Upper Maragheh	37.4	46.41	37.66	37.714	46.034	45.95	Mammal tooth-crown height	7.25	7.75	Tortonian							11.7	787.7	Eronen et al., 2010									11.7	787.7
172	Novo-Elizavetovka	47	31	47.02	47.022	30.321	30.173	Mammal tooth-crown height	7.25	7.75	Tortonian							1017	1793	Eronen et al., 2010									1017	1793
173	Kemiklitepe A-B	37.5	29	37.491	37.487	28.595	28.506	Mammal tooth-crown height	7.25	7.75	Tortonian							293.6	1069.6	Eronen et al., 2010									293.6	1069.6
174	Kemiklitepe D	37.5	29	37.487	37.484	28.506	28.461	Mammal tooth-crown height	7.75	8.7	Tortonian							293.6	1069.6	Eronen et al., 2010									293.6	1069.6
175	Pavlodar	52	77	52.49	52.66	76.632	76.496	Mammal tooth-crown height	4.9	7.25	Messinian							293.6	1069.6	Eronen et al., 2010									293.6	1069.6
176	Samos Old Mill Beds	37.5	26.87	37.458	37.446	26.466	26.378	Mammal tooth-crown height	7.25	7.75	Tortonian							0	588.9	Eronen et al., 2010									0	588.9
177	Samos White Sands	37.5	26.87	37.458	37.446	26.466	26.378	Mammal tooth-crown height	7.25	7.75	Tortonian							293.6	1069.6	Eronen et al., 2010									293.6	1069.6
178	Samos Main Bone Beds	37.5	26.87	37.458	37.446	26.466	26.378	Mammal tooth-crown height	7.25	7.75	Tortonian							293.6	1069.6	Eronen et al., 2010									293.6	1069.6
179	Las Pedrizas	36.83	-4.5	36.329	36.219	-4.769	-4.826	Mammal tooth-crown height	7.25	7.75	Tortonian							11.7	787.7	Eronen et al., 2010									11.7	787.7
180	Subsol de Sabadell	41.33	2.07	40.714	40.629	1.462	1.372	Mammal tooth-crown height	9.7	11.1	Tortonian							1017	1793	Eronen et al., 2010									1017	1793
181	Sant Miquel de Taudell	41.55	1.98	40.932	40.847	1.365	1.274	Mammal tooth-crown height	9.7	11.1	Tortonian							1017	1793	Eronen et al., 2010									1017	1793
182	El Firal	42.36	1.45	41.731	41.644	0.811	0.716	Mammal tooth-crown height	9.7	11.1	Tortonian							1017	1793	Eronen et al., 2010									1017	1793
183	Sinap 1	40.54	32.69	40.6	40.605	32.047	31.97	Mammal tooth-crown height	8.7	9.7	Tortonian							345.1	1121.1	Eronen et al., 2010									345.1	1121.1
184	Sinap 4	40.55	32.69	40.615	40.623	31.969	31.883	Mammal tooth-crown height	9.7	11.1	Tortonian							345.1	1121.1	Eronen et al., 2010									345.1	1121.1
185	Sinap 8A	40.54	32.7	40.605	40.613	31.98	31.894	Mammal tooth-crown height	9.7	11.1	Tortonian							0	588.9	Eronen et al., 2010									0	588.9
186	Sinap 12	40.56	32.7	40.62	40.625	32.056	31.979	Mammal tooth-crown height	8.7	9.7	Tortonian							11.7	787.7	Eronen et al., 2010									11.7	787.7
187	Sinap 14	40.53	32.62	40.594	40.601	31.9	31.814	Mammal tooth-crown height	9.7	11.1	Tortonian							0	588.9	Eronen et al., 2010									0	588.9
188	Sinap 26	40.56	32.64	40.607	40.615	32.156	32.05	Mammal tooth-crown height	7.25	7.75	Tortonian							293.6	1069.6	Eronen et al., 2010									293.6	1069.6
189	Sinap 27	40.56	32.64	40.607	40.615	32.156	32.05	Mammal tooth-crown height	7.25	7.75	Tortonian							293.6	1069.6	Eronen et al., 2010									293.6	1069.6
190	Sinap 33	40.55	32.64	40.597	40.605	32.156	32.05	Mammal tooth-crown height	7.25	7.75	Tortonian							293.6	1069.6	Eronen et al., 2010									293.6	1069.6
191	Sinap 34	40.55	32.64	40.605	40.609	32.05	31.996	Mammal tooth-crown height	7.75	8.7	Tortonian							0	588.9	Eronen et al., 2010									0	588.9
192	Sinap 45	40.53	32.66	40.594	40.602	31.94	31.854	Mammal tooth-crown height	9.7	11.1	Tortonian							11.7	787.7	Eronen et al., 2010									11.7	787.7
193	Sinap 49	40.58	32.93	40.645	40.651	32.285	32.208	Mammal tooth-crown height	8.7	9.7	Tortonian							1017	1793	Eronen et al., 2010									1017	1793
194	Sinap 51	40.56	32.7	40.625	40.633	31.979	31.893	Mammal tooth-crown height	9.7	11.1	Tortonian							293.6	1069.6	Eronen et al., 2010									293.6	1069.6
195	Sinap 63	40.63	32.65	40.685	40.689	32.057	32.003	Mammal tooth-crown height	7.75	8.7	Tortonian							0	588.9	Eronen et al., 2010									0	588.9
196	Sinap 64	40.56	32.7	40.625	40.633	31.979	31.893	Mammal tooth-crown height	9.7	11.1	Tortonian							0	588.9	Eronen et al., 2010									0	588.9
197	Sinap 72	40.56	32.7	40.625	40.633	31.979	31.893	Mammal tooth-crown height	9.7	11.1	Tortonian							293.6	1069.6	Eronen et al., 2010									293.6	1069.6
198	Sinap 91	40.55	32.71	40.616	40.624	31.989	31.903	Mammal tooth-crown height	9.7	11.1	Tortonian							0	588.9	Eronen et al., 2010									0	588.9
199	Sinap 94	40.55	32.69	40.615	40.623	31.969	31.883	Mammal tooth-crown height	9.7	11.1	Tortonian							345.1	1121.1	Eronen et al., 2010									345.1	1121.1
200	Sinap 108	40.54	32.7	40.605	40.613	31.98	31.894	Mammal tooth-crown height	9.7	11.1	Tortonian							0	588.9	Eronen et al., 2010									0	588.9
201	Sinap 40	40.56	32.7	40.625	40.633	31.979	31.893	Mammal tooth-crown height	9.7	11.1	Tortonian							0	588.9	Eronen et al., 2010									0	588.9
202	Sinap 46	40.53	32.64	40.589	40.594	31.997	31.92	Mammal tooth-crown height	8.7	9.7	Tortonian							0	588.9	Eronen et al., 2010									0	588.9
203	Sinap 50	40.52	32.65	40.579	40.584	32.007	31.931	Mammal tooth-crown height	8.7	9.7	Tortonian							0	588.9	Eronen et al., 2010									0	588.9
204	Sinap 58	40.54	32.63	40.598	40.604	31.987	31.91	Mammal tooth-crown height	8.7	9.7	Tortonian							0	588.9	Eronen et al., 2010									0	588.9
205	Sinap 70	40.55	32.64	40.597	40.605	32.156	32.05	Mammal tooth-crown height	7.25	7.75	Tortonian							0	588.9	Eronen et al., 2010									0	588.9
206	Sinap 77	39.91	33.25	39.954	39.967	32.907	32.784	Mammal tooth-crown height	4.9	7.25	Messinian							0	588.9	Eronen et al., 2010									0	588.9
207	Sinap 78	39.91	33.25	39.954	39.967	32.907	32.784	Mammal tooth-crown height	4.9	7.25	Messinian							0	588.9	Eronen et al., 2010									0	588.9
208	Sinap 88	40.56	32.7	40.625	40.633	31.979	31.893	Mammal tooth-crown height	9.7	11.1	Tortonian							0	588.9	Eronen et al., 2010									0	588.9
209	Sinap 83	40.55	32.69	40.61	40.615	32.046	31.969	Mammal tooth-crown height	8.7	9.7	Tortonian							345.1	1121.1	Eronen et al., 2010									345.1	1121.1
210	Vivero de Pinos	40.33	-1.08	39.773	39.723	-1.525	-1.565	Mammal tooth-crown height	7.75	8.7	Tortonian							11.7	787.7	Eronen et al., 2010									11.7	787.7
211	Can Ponsic I	41.53	2.07	40.913	40.829	1.455	1.364	Mammal tooth-crown height	9.7	11.1	Tortonian							1551	2327	Eronen et al., 2010									1551	2327
212	Khirgis-Nur II-lower	49.2	93.4	49.796	50.002	92.864	92.662	Mammal tooth-crown height	4.9	7.25	Messinian							0	588.9	Eronen et al., 2010									0	588.9
213	Khirgis-Nur II-Altan-Teli	49.2	93.4	50.002	50.183	92.662	93.861	Mammal tooth-crown height	7.25	7.75	Tortonian							0	588.9	Eronen et al., 2010									0	588.9
214	Altan-Teli	47	92.6	47.971	48.057	92.403	92.383	Mammal tooth-crown height	7.75	8.7	Tortonian							293.6	1069.6	Eronen et al., 2010									293.6	1069.6
215	Oshin-I-5 upper	47	92.4	48.177	48.341	92.149	92.126	Mammal tooth-crown height	9.7	11.1	Tortonian							0	588.9	Eronen et al., 2010									0	588.9
216	Qaidam-Tuosu	37	97	37.119	37.165	95.786	95.591	Mammal tooth-crown height	9.7	11.1	Tortonian							345.1	1121.1	Eronen et al., 2010									345.1	1121.1
217	Amuwusu	42.36	112.74	43.158	43.298	111.881	111.881	Mammal tooth-crown height	9.7	11.1	Tortonian							345.1	1121.1	Eronen et al., 2010									345.1	1121.1
218	Biru-Bulong	31.56	93.83	28.947	28.649	93.546	93.504	Mammal tooth-crown height	8.7	9.7	Tortonian							0	588.9	Eronen et al., 2010									0	588.9
219	Wuzhong-ganhegou	37.99	106.2	38.614	38.738	105.48	105.487	Mammal tooth-crown height	9.7	11.1	Tortonian							11.7	787.7	Eronen et al., 2010									11.7	787.7
220	Zhongning-ganhegou	37.49	105.66	38.099	38.222	104.958	104.966	Mammal tooth-crown height	9.7	11.1	Tortonian							0	588.9	Eronen et al., 2010									0	588.9
221	Sherullah 9	34.3	69.4	35.059	35.146	69.14	69.107	Mammal tooth-crown height	8.7	9.7	Tortonian							0	588.9	Eronen et al., 2010									0	588.9
222	Taghar	34.35	69.41	35.048	35.109	69.173	69.149	Mammal tooth-crown height	7.75	8.7	Tortonian							293.6	1069.6	Eronen et al., 2010									293.6	1069.6
223	Sinap 114	40.55	32.71	40.616	40.624	31.989	31.903	Mammal tooth-crown height	9.7	11.1	Tortonian							0	588.9	Eronen et al., 2010									0	588.9
224	Oshin-II-5 upper	47	92.4	48.177	48.341	92.149	92.126	Mammal tooth-crown height	9.7	11.1	Tortonian							0	588.9	Eronen et al., 2010									0	588.9
225	Puy Courny	45	2.2	44.696	44.587	1.824	1.693	Mammal tooth-crown height	4.9	7.25	Messinian							345.1	1121.1	Eronen et al., 2010									345.1	1121.1
226	Arquillo 1	40.4	-1.1	40.063	39.943	-1.373	-1.468	Mammal tooth-crown height	4.9	7.25	Messinian							293.6	1069.6	Eronen et al., 2010									293.6	1069.6
227	La Gloria 5	40.38	-1.06	40.043	39.923	-1.333	-1.428	Mammal tooth-crown height	4.9	7.25	Messinian							0	588.9	Eronen et al., 2010									0	588.9
228	Rambla de Valdecebro 6	40.22	-1.05	39.884	39.764	-1.32	-1.414	Mammal tooth-crown height	4.9	7.25	Messinian							0	588.9	Eronen et al., 2010									0	588.9
229	Rambla de Valdecebro 3	40.22	-1.05	39.884	39.764	-1.32	-1.414	Mammal tooth-crown height	4.9	7.25	Messinian							0	588.9	Eronen et al., 2010									0	588.9
230	Bunker de Valdecebro	40.35	-1.05	40.014	39.894	-1.322	-1.417	Mammal tooth-crown height	4.9	7.25	Messinian							0	588.9	Eronen et al., 2010									0	588.9
231	Rambla de Valdecebro 0	40.22	-1.05	39.884	39.764	-1.32	-1.414	Mammal tooth-crown height	4.9	7.25	Messinian							0	588.9	Eronen et al., 2010									0	588.9
232	Kholobolochi Nor	45.4	100.9	46.028	46.248	100.488	100.333	Mammal tooth-crown height	4.9	7.25	Messinian							293.6	1069.6	Eronen et al., 2010									293.6	1069.6
233	Khirgis-Nur I-Altan-Teli	49.2	93.4	50.002	50.183	92.662	93.861	Mammal tooth-crown height	7.25	7.75	Tortonian							0	588.9	Eronen et al., 2010									0	588.9
234	Olkhon (Sarayskaya, hor. 3)	53.1	107.2	53.749	53.977	107.224	107.227	Mammal tooth-crown height	4.9	7.25	Messinian							345.1	1121.1	Eronen et al., 2010									345.1	1121.1
235	Dzhuanaryk	42.2	75.6	42.281	42.288	75.126	75.084	Mammal tooth-crown height	7.75	8.7	Tortonian							293.6	1069.6	Eronen et al., 2010									293.6	1069.6
236	Bel'dersaj lower	41.1	70	41.047	41.042	69.575	69.537	Mammal tooth-crown height	7.75	8.7	Tortonian							0	588.9	Eronen et al., 2010									0	588.9
237	Ortok	42.4	75.6	42.467	42.481	75.203	75.117	Mammal tooth-crown height	7.25	7.75	Tortonian							345.1	1121.1	Eronen et al., 2010									345.1	1121.1
238	Saty lower	42.95	77.5	43.758	43.829	77.152	77.118	Mammal tooth-crown height	7.75	8.7	Tortonian							345.1	1121.1	Eronen et al., 2010									345.1	1121.1
239	Botamojnak	42.95	77.3	43.927	44.063	76.866	76.817	Mammal tooth-crown height	9.7	11.1	Tortonian							293.6	1069.6	Eronen et al., 2010									293.6	1069.6
240	Sor	39.27	67.65	39.824	39.941	67.35	67.281	Mammal tooth-crown height	7.25	7.75	Tortonian							293.6	1069.6	Eronen et al., 2010									293.6	1069.6
241	Karabastuz	50.3	79.16	50.807	50.983	78.85	78.734	Mammal tooth-crown height	4.9	7.25	Messinian							293.6	1069.6	Eronen et al., 2010									293.6	1069.6
242	Turme	49.4	66	50.18	50.287	65.146	65.037	Mammal tooth-crown height	9.7	11.1	Tortonian							0	588.9	Eronen et al., 2010									0	588.9
243	Pentalophos 1 (PNT)	41	23	40.842	40.818	22.273	22.186	Mammal tooth-crown height	9.7	11.1	Tortonian							11.7	787.7	Eronen et al., 2010									11.7	787.7
244	Nikiti 2 (NIK)	40	23.5	39.882	39.87	22.935	22.884	Mammal tooth-crown height	7.75	8.7	Tortonian							293.6	1069.6	Eronen et al., 2010									293.6	1069.6
245	Vathylakkos 1 (VLO)	41	23	40.897	40.872	22.51	22.403	Mammal tooth-crown height	7.25	7.75	Tortonian							11.7	787.7	Eronen et al., 2010									11.7	787.7
246	Vathylakkos 2 (VTK)	41	23	40.897	40.872	22.51	22.403	Mammal tooth-crown height	7.25	7.75	Tortonian							11.7	787.7	Eronen et al., 2010									11.7	787.7
247	Vathylakkos 3 (VAT)	41	23	40.897	40.872	22.51	22.403	Mammal tooth-crown height	7.25	7.75	Tortonian							1017	1793	Eronen et al., 2010									1017	1793
248	Samos (A-1)	37.75	26.97	37.709	37.698	26.56	26.47	Mammal tooth-crown height	7.25	7.75	Tortonian							293.6	1069.6	Eronen et al., 2010									293.6	1069.6
249	Tanagra	38.31	23.53	37.659	37.601	23.202	23.174	Mammal tooth-crown height	7.75	8.7	Tortonian							293.6	1069.6	Eronen et al., 2010									293.6	1069.6
250	Chalkoutsi	38.31	23.6	37.773	37.659	23.328	23.271	Mammal tooth-crown height	7.25	7.75	Tortonian							0	588.9	Eronen et al., 2010									0	588.9
251	Triada	38.5	23.5	37.848	37.791	23.17	23.142	Mammal tooth-crown height	7.75	8.7	Tortonian							293.6	1069.6	Eronen et al., 2010									293.6	1069.6
252	Alifakas	39.5	22.5	38.956	38.841	22.225	22.167	Mammal tooth-crown height	7.25	7.75	Tortonian							293.6	1069.6	Eronen et al., 2010									293.6	1069.6
253	Achladi	38.5	23.5	37.963	37.848	23.227	23.17	Mammal tooth-crown height	7.25	7.75	Tortonian							0	588.9	Eronen et al., 2010									0	588.9
254	Rhodes	36.16	28	35.544	35.49	27.661	27.632	Mammal tooth-crown height	7.75	8.7	Tortonian							0	588.9	Eronen et al., 2010									0	588.9
255	Servia	40.18	22	39.517	39.459	21.664	21.635	Mammal tooth-crown height	7.75	8.7	Tortonian							345.1	1121.1	Eronen et al., 2010									345.1	1121.1
256	Ano Metochi	41	23.5	40.905	40.882	23.009	22.902	Mammal tooth-crown height	7.25	7.75	Tortonian							0	588.9	Eronen et al., 2010									0	588.9
257	Pikermi-MNHN (PIK)	38.08	23.88	37.545	37.431	23.608	23.552	Mammal tooth-crown height	7.25	7.75	Tortonian							1551	2327	Eronen et al., 2010									1551	2327
258	Chomateres	38.08	23.88	37.545	37.431	23.608	23.552	Mammal tooth-crown height	7.25	7.75	Tortonian							1017	1793	Eronen et al., 2010									1017	1793
259	Dytiko 1 (DTK)	41	23	40.925	40.897	22.639	22.51	Mammal tooth-crown height	4.9	7.25	Messinian							293.6	1069.6	Eronen et al., 2010									293.6	1069.6
260	Dytiko 2 (DIT)	41	23	40.925	40.897	22.639	22.51	Mammal tooth-crown height	4.9	7.25	Messinian							11.7	787.7	Eronen et al., 2010									11.7	787.7
261	Dytiko 3 (DKO)	41	23	40.925	40.897	22.639	22.51	Mammal tooth-crown height	4.9	7.25	Messinian							293.6	1069.6	Eronen et al., 2010									293.6	1069.6
262	Sinap 8B	40.54	32.7	40.605	40.613	31.98	31.894	Mammal tooth-crown height	9.7	11.1	Tortonian							0	588.9	Eronen et al., 2010									0	588.9
263	Lantian-jiulaopo-s3	34.1	109.3	35.182	35.419	108.307	108.091	Mammal tooth-crown height	7.25	7.75	Tortonian							11.7	787.7	Eronen et al., 2010									11.7	787.7
264	Lantian-Shuijiazui	34.1	109.3	35.709	35.868	107.826	107.809	Mammal tooth-crown height	9.7	11.1	Tortonian							293.6	1069.6	Eronen et al., 2010									293.6	1069.6
265	Lantian-koujiacun-damiaogou	34.1	109.3	35.182	35.419	108.307	108.091	Mammal tooth-crown height	7.25	7.75	Tortonian							11.7	787.7	Eronen et al., 2010									11.7	787.7
266	Lantian-majiahe-yuanjiagou	34.1	109.3	35.182	35.419	108.307	108.091	Mammal tooth-crown height	7.25	7.75	Tortonian							11.7	787.7	Eronen et al., 2010									11.7	787.7
267	Lantian-gongwangling-shuizigou	34.1	109.3	35.182	35.419	108.307	108.091	Mammal tooth-crown height	7.25	7.75	Tortonian							293.6	1069.6	Eronen et al., 2010									293.6	1069.6
268	Yushe-hounao	37	112.9	37.706	37.957	112.311	112.102	Mammal tooth-crown height	4.9	7.25	Messinian							11.7	787.7	Eronen et al., 2010									11.7	787.7
269	Lufeng-shihuiba	25.3	102.4	25.736	25.831	102.751	102.826	Mammal tooth-crown height	7.25	7.75	Tortonian							1551	2327	Eronen et al., 2010									1551	2327
270	Grakali	41.93	44.3	42.26	42.304	43.554	43.463	Mammal tooth-crown height	9.7	11.1	Tortonian							0	588.9	Eronen et al., 2010									0	588.9
271	Udabno II	41.31	45.23	41.625	41.661	44.591	44.513	Mammal tooth-crown height	8.7	9.7	Tortonian							11.7	787.7	Eronen et al., 2010									11.7	787.7
272	Eldari II & III	41.3	45.7	41.6	41.625	45.117	45.063	Mammal tooth-crown height	7.75	8.7	Tortonian							0	588.9	Eronen et al., 2010									0	588.9
273	Natlismtsemeli I	41.31	45.21	41.66	41.708	44.493	44.406	Mammal tooth-crown height	9.7	11.1	Tortonian							293.6	1069.6	Eronen et al., 2010									293.6	1069.6
274	Buzhor 2	44.56	28.16	44.519	44.511	27.27	27.16	Mammal tooth-crown height	9.7	11.1	Tortonian							11.7	787.7	Eronen et al., 2010									11.7	787.7
275	Atavaska	47	28.8	46.972	46.966	27.793	27.667	Mammal tooth-crown height	9.7	11.1	Tortonian							345.1	1121.1	Eronen et al., 2010									345.1	1121.1
276	Poksheshty	47.24	28.68	47.214	47.209	27.769	27.661	Mammal tooth-crown height	8.7	9.7	Tortonian							11.7	787.7	Eronen et al., 2010									11.7	787.7
277	Fiume Santo	40.8	8.3	40.189	40.059	8.134	8.1	Mammal tooth-crown height	7.25	7.75	Tortonian							11.7	787.7	Eronen et al., 2010									11.7	787.7
278	Serrazzano	43.6	10.8	42.998	42.87	10.592	10.548	Mammal tooth-crown height	7.25	7.75	Tortonian							0	588.9	Eronen et al., 2010									0	588.9
279	Velona	43.05	11.5	42.606	42.451	11.343	11.289	Mammal tooth-crown height	4.9	7.25	Messinian							0	588.9	Eronen et al., 2010									0	588.9
280	Hostalets de Pierola Superior	41.2	0.5	40.552	40.463	-0.088	-0.175	Mammal tooth-crown height	9.7	11.1	Tortonian							1017	1793	Eronen et al., 2010									1017	1793
281	Crevillente 15	38.25	-0.8	37.797	37.698	-1.122	-1.191	Mammal tooth-crown height	7.25	7.75	Tortonian							345.1	1121.1	Eronen et al., 2010									345.1	1121.1
282	Crevillente 16	38.23	-0.8	37.777	37.678	-1.122	-1.191	Mammal tooth-crown height	7.25	7.75	Tortonian							345.1	1121.1	Eronen et al., 2010									345.1	1121.1
283	Chimishlija (Cimislia)	46.5	28.8	46.486	46.48	28.138	27.994	Mammal tooth-crown height	7.25	7.75	Tortonian							1551	2327	Eronen et al., 2010									1551	2327
284	Kujalnitskij liman	46.5	30.8	46.518	46.518	29.994	29.921	Mammal tooth-crown height	7.75	8.7	Tortonian							293.6	1069.6	Eronen et al., 2010									293.6	1069.6
285	Pichugino	47.97	33.4	48.037	48.041	32.534	32.456	Mammal tooth-crown height	7.75	8.7	Tortonian							345.1	1121.1	Eronen et al., 2010									345.1	1121.1
286	Tiraspol (Kolkotova Balka)	46.83	29.6	46.825	46.823	28.781	28.707	Mammal tooth-crown height	7.75	8.7	Tortonian							11.7	787.7	Eronen et al., 2010									11.7	787.7
287	Odessa 2	46.5	30.8	46.515	46.517	30.312	30.138	Mammal tooth-crown height	4.9	7.25	Messinian							0	588.9	Eronen et al., 2010									0	588.9
288	Krivaja Balka	46.5	30.8	46.515	46.517	30.312	30.138	Mammal tooth-crown height	4.9	7.25	Messinian							345.1	1121.1	Eronen et al., 2010									345.1	1121.1
289	Zheltokamenka	45.26	33.45	45.34	45.35	32.526	32.412	Mammal tooth-crown height	9.7	11.1	Tortonian							345.1	1121.1	Eronen et al., 2010									345.1	1121.1
290	Inzersdorf	48.13	16.33	47.817	47.771	15.315	15.189	Mammal tooth-crown height	9.7	11.1	Tortonian							0	588.9	Eronen et al., 2010									0	588.9
291	Aljezar B	40.34	-1.09	39.883	39.783	-1.457	-1.536	Mammal tooth-crown height	7.25	7.75	Tortonian							0	588.9	Eronen et al., 2010									0	588.9
292	Dinotheriensande	49	8	48.504	48.433	7.012	6.892	Mammal tooth-crown height	9.7	11.1	Tortonian							345.1	1121.1	Eronen et al., 2010									345.1	1121.1
293	Breitenfeld	47.16	15.5	46.829	46.781	14.538	14.42	Mammal tooth-crown height	9.7	11.1	Tortonian							345.1	1121.1	Eronen et al., 2010									345.1	1121.1
294	Bermersheim	49.77	8.09	49.275	49.205	7.063	6.937	Mammal tooth-crown height	9.7	11.1	Tortonian							345.1	1121.1	Eronen et al., 2010									345.1	1121.1
295	Laaerberg	48.17	16.27	47.855	47.81	15.253	15.128	Mammal tooth-crown height	9.7	11.1	Tortonian							11.7	787.7	Eronen et al., 2010									11.7	787.7
296	Nikolsburg	48.8	16.63	48.493	48.448	15.579	15.448	Mammal tooth-crown height	9.7	11.1	Tortonian							345.1	1121.1	Eronen et al., 2010									345.1	1121.1
297	Las Casiones	40.43	-1.11	40.093	39.973	-1.383	-1.479	Mammal tooth-crown height	4.9	7.25	Messinian							293.6	1069.6	Eronen et al., 2010									293.6	1069.6
298	Arenas del Rey	36.96	-3.9	36.596	36.466	-4.104	-4.175	Mammal tooth-crown height	4.9	7.25	Messinian							293.6	1069.6	Eronen et al., 2010									293.6	1069.6
299	Molina de Aragón	40.85	-1.88	40.155	40.058	-2.431	-2.513	Mammal tooth-crown height	9.7	11.1	Tortonian							0	588.9	Eronen et al., 2010									0	588.9
300	Valdecebro 3	40.35	-1.0333	40.014	39.894	-1.306	-1.401	Mammal tooth-crown height	4.9	7.25	Messinian							0	588.9	Eronen et al., 2010									0	588.9
301	Cerro de la Garita	40.38	-1.08	39.923	39.823	-1.448	-1.527	Mammal tooth-crown height	7.25	7.75	Tortonian							1017	1793	Eronen et al., 2010									1017	1793
302	Masada del Valle 2	40.12	-0.26	39.674	39.577	-0.627	-0.706	Mammal tooth-crown height	7.25	7.75	Tortonian							0	588.9	Eronen et al., 2010									0	588.9
303	Croix-Rousse	45.78	4.83	45.279	45.219	4.106	4.022	Mammal tooth-crown height	8.7	9.7	Tortonian							345.1	1121.1	Eronen et al., 2010									345.1	1121.1
304	Masa del Barbo 2	40.66	0.83	40.087	40.019	0.318	0.258	Mammal tooth-crown height	8.7	9.7	Tortonian							293.6	1069.6	Eronen et al., 2010									293.6	1069.6
305	Orignac	43.11	0.16	42.524	42.454	-0.425	-0.493	Mammal tooth-crown height	8.7	9.7	Tortonian							345.1	1121.1	Eronen et al., 2010									345.1	1121.1
306	Das	42.35	1.86	41.729	41.644	1.217	1.122	Mammal tooth-crown height	9.7	11.1	Tortonian							345.1	1121.1	Eronen et al., 2010									345.1	1121.1
307	Estevar	42.4682	1.9956	41.85	41.765	1.347	1.251	Mammal tooth-crown height	9.7	11.1	Tortonian							293.6	1069.6	Eronen et al., 2010									293.6	1069.6
308	Hinterauerbach	48.4	12.01	47.991	47.932	11.014	10.892	Mammal tooth-crown height	9.7	11.1	Tortonian							345.1	1121.1	Eronen et al., 2010									345.1	1121.1
309	Peralejos D	40.29	-1.02	39.734	39.684	-1.465	-1.504	Mammal tooth-crown height	7.75	8.7	Tortonian							0	588.9	Eronen et al., 2010									0	588.9
310	Sinap 118	40.28	32.96	40.321	40.332	32.609	32.484	Mammal tooth-crown height	4.9	7.25	Messinian							0	588.9	Eronen et al., 2010									0	588.9
311	Esvres - Upper Faluns	47.3	0.8	46.656	46.564	-0.027	-0.125	Mammal tooth-crown height	9.7	11.1	Tortonian							345.1	1121.1	Eronen et al., 2010									345.1	1121.1
312	Masa del Barbo 2B	40.66	-1.16	40.051	39.979	-1.654	-1.712	Mammal tooth-crown height	8.7	9.7	Tortonian							293.6	1069.6	Eronen et al., 2010									293.6	1069.6
313	Jebel Dhannah	24.16	52.56	23.146	22.778	52.034	51.848	Mammal tooth-crown height	4.9	7.25	Messinian							293.6	1069.6	Eronen et al., 2010									293.6	1069.6
314	Can Trullàs	41.55	1.96	40.997	40.931	1.41	1.345	Mammal tooth-crown height	8.7	9.7	Tortonian							345.1	1121.1	Eronen et al., 2010									345.1	1121.1
315	Achldorf	48.43	12.36	48.028	47.971	11.359	11.237	Mammal tooth-crown height	9.7	11.1	Tortonian							345.1	1121.1	Eronen et al., 2010									345.1	1121.1
316	Bonnefont	43.25	0.35	42.598	42.508	-0.31	-0.409	Mammal tooth-crown height	9.7	11.1	Tortonian							345.1	1121.1	Eronen et al., 2010									345.1	1121.1
317	Trie-sur-Baïse	43.33	0.36	42.678	42.586	-0.303	-0.378	Mammal tooth-crown height	9.7	11.1	Tortonian							345.1	1121.1	Eronen et al., 2010									345.1	1121.1
318	Nakali	1.18	36.4	0.537	0.438	36.389	36.388	Mammal tooth-crown height	9.7	11.1	Tortonian							11.7	787.7	Eronen et al., 2010									11.7	787.7
319	Builstyn Khudag	45.38	101.51	46.512	46.645	102.248	102.331	Mammal tooth-crown height	8.7	9.7	Tortonian							0	588.9	Eronen et al., 2010									0	588.9
320	Valdecebro 5	40.35	-1.03	39.894	39.794	-1.398	-1.476	Mammal tooth-crown height	7.25	7.75	Tortonian							0	588.9	Eronen et al., 2010									0	588.9
321	Aveiras de Baixo	39.11	-8.86	38.284	38.167	-9.278	-9.34	Mammal tooth-crown height	9.7	11.1	Tortonian							345.1	1121.1	Eronen et al., 2010									345.1	1121.1
322	Azambujeira inf.	39.26	-8.78	38.436	38.318	-9.203	-9.266	Mammal tooth-crown height	9.7	11.1	Tortonian							345.1	1121.1	Eronen et al., 2010									345.1	1121.1
323	Hadjidimovo-1	41.5	23.83	41.41	41.388	23.325	23.215	Mammal tooth-crown height	7.25	7.75	Tortonian							1551	2327	Eronen et al., 2010									1551	2327
324	Gargano	41.83	16	41.4	41.251	15.819	15.757	Mammal tooth-crown height	4.9	7.25	Messinian							345.1	1121.1	Eronen et al., 2010									345.1	1121.1
325	Akgedik-Bayir	37.25	28.25	37.229	37.223	27.852	27.764	Mammal tooth-crown height	7.25	7.75	Tortonian							293.6	1069.6	Eronen et al., 2010									293.6	1069.6
326	Silata	41	23	40.925	40.897	22.639	22.51	Mammal tooth-crown height	4.9	7.25	Messinian							293.6	1069.6	Eronen et al., 2010									293.6	1069.6
327	Gusinyy perelyot	50.25	67.83	50.804	50.921	67.257	67.128	Mammal tooth-crown height	7.25	7.75	Tortonian							0	588.9	Eronen et al., 2010									0	588.9
328	Masia de la Roma 2	40.5	-1	39.822	39.728	-1.548	-1.63	Mammal tooth-crown height	9.7	11.1	Tortonian							0	588.9	Eronen et al., 2010									0	588.9
329	Concud Barranco	40.4	-1.01	39.944	39.844	-1.379	-1.458	Mammal tooth-crown height	7.25	7.75	Tortonian							345.1	1121.1	Eronen et al., 2010									345.1	1121.1
330	Kalimanci 1	42.5	23.1	42.374	42.361	22.453	22.394	Mammal tooth-crown height	7.75	8.7	Tortonian							293.6	1069.6	Eronen et al., 2010									293.6	1069.6
331	Kalimanci 3	42.5	23.1	42.398	42.374	22.568	22.453	Mammal tooth-crown height	7.25	7.75	Tortonian							293.6	1069.6	Eronen et al., 2010									293.6	1069.6
332	Kalimanci 4	42.5	23.1	42.398	42.374	22.568	22.453	Mammal tooth-crown height	7.25	7.75	Tortonian							0	588.9	Eronen et al., 2010									0	588.9
333	Kromidovo 1	41.45	23.36	41.38	41.352	22.989	22.857	Mammal tooth-crown height	4.9	7.25	Messinian							0	588.9	Eronen et al., 2010									0	588.9
334	Hamra	23.1	52.51	22.087	21.72	51.965	51.771	Mammal tooth-crown height	4.9	7.25	Messinian							345.1	1121.1	Eronen et al., 2010									345.1	1121.1
335	Jebel Barakah	24	52.33	22.99	22.623	51.803	51.616	Mammal tooth-crown height	4.9	7.25	Messinian							0	588.9	Eronen et al., 2010									0	588.9
336	Shuwaihat	24.1	52.43	23.088	22.721	51.904	51.718	Mammal tooth-crown height	4.9	7.25	Messinian							293.6	1069.6	Eronen et al., 2010									293.6	1069.6
337	Thumayriya	24.15	53	23.129	22.759	52.471	52.283	Mammal tooth-crown height	4.9	7.25	Messinian							345.1	1121.1	Eronen et al., 2010									345.1	1121.1
338	Kihal	24.11	53	23.089	22.719	52.47	52.282	Mammal tooth-crown height	4.9	7.25	Messinian							293.6	1069.6	Eronen et al., 2010									293.6	1069.6
339	Lantian-6	34	109	35.092	35.331	107.998	107.78	Mammal tooth-crown height	7.25	7.75	Tortonian							0	588.9	Eronen et al., 2010									0	588.9
340	Prottes	48.33	16.75	48.059	48.026	15.83	15.722	Mammal tooth-crown height	8.7	9.7	Tortonian							0	588.9	Eronen et al., 2010									0	588.9
341	Edeleny	48.33	20.75	48.116	48.085	19.699	19.569	Mammal tooth-crown height	9.7	11.1	Tortonian							345.1	1121.1	Eronen et al., 2010									345.1	1121.1
342	Schwechat	48.13	16.46	47.854	47.82	15.55	15.444	Mammal tooth-crown height	8.7	9.7	Tortonian							0	588.9	Eronen et al., 2010									0	588.9
343	Chiang Muan	18.93	100.23	19.085	19.098	101.612	101.846	Mammal tooth-crown height	9.7	11.1	Tortonian							1017	1793	Eronen et al., 2010									1017	1793
344	Tha Chang 2	15	102.33	15.166	15.192	103.869	104.048	Mammal tooth-crown height	8.7	9.7	Tortonian							0	588.9	Eronen et al., 2010									0	588.9
345	Sop Mae Tham	16.75	99	16.82	16.822	100.564	100.825	Mammal tooth-crown height	9.7	11.1	Tortonian							11.7	787.7	Eronen et al., 2010									11.7	787.7
346	Lothagam 1	2.9	36.05	2.46	2.366	36.028	36.023	Mammal tooth-crown height	7.25	7.75	Tortonian							493.8	1269.8	Eronen et al., 2010									493.8	1269.8
347	Lothagam 2	2.9	36.05	2.573	2.46	36.033	36.028	Mammal tooth-crown height	4.9	7.25	Messinian							1038	1814	Eronen et al., 2010									1038	1814
348	Samburu Hills 2	1.78	36.61	1.206	1.14	36.593	36.592	Mammal tooth-crown height	8.7	9.7	Tortonian							1017	1793	Eronen et al., 2010									1017	1793
349	Manonga 1	-3.9	33.73	-4.241	-4.359	33.754	33.763	Mammal tooth-crown height	4.9	7.25	Messinian							0	588.9	Eronen et al., 2010									0	588.9
350	Albertine 1	2	31	1.643	1.519	30.99	30.986	Mammal tooth-crown height	4.9	7.25	Messinian							1017	1793	Eronen et al., 2010									1017	1793
351	Albertine 6	1.16	30.5	0.521	0.448	30.492	30.491	Mammal tooth-crown height	8.7	9.7	Tortonian							0	588.9	Eronen et al., 2010									0	588.9
352	Albertine 7	1.08	30.41	0.72	0.595	30.405	30.404	Mammal tooth-crown height	4.9	7.25	Messinian							0	588.9	Eronen et al., 2010									0	588.9
353	Albertine 11	0.16	30	-0.203	-0.328	30	30.001	Mammal tooth-crown height	4.9	7.25	Messinian							345.1	1121.1	Eronen et al., 2010									345.1	1121.1
354	Albertine 14	1	30.08	0.638	0.512	30.075	30.074	Mammal tooth-crown height	4.9	7.25	Messinian							1017	1793	Eronen et al., 2010									1017	1793
355	Awash 1	10.08	40.5	9.489	9.397	40.37	40.351	Mammal tooth-crown height	9.7	11.1	Tortonian							0	588.9	Eronen et al., 2010									0	588.9
356	Ngorora	0.66	36	0.012	-0.088	35.996	35.996	Mammal tooth-crown height	9.7	11.1	Tortonian							293.6	1069.6	Eronen et al., 2010									293.6	1069.6
357	Mpesida	0.66	36	0.333	0.219	35.997	35.996	Mammal tooth-crown height	4.9	7.25	Messinian							293.6	1069.6	Eronen et al., 2010									293.6	1069.6
358	Kefraya	33.75	35.75	33.306	33.211	35.434	35.368	Mammal tooth-crown height	7.25	7.75	Tortonian							293.6	1069.6	Eronen et al., 2010									293.6	1069.6
359	Akin	38.4	30.32	38.411	38.412	29.683	29.608	Mammal tooth-crown height	9.7	11.1	Tortonian							345.1	1121.1	Eronen et al., 2010									345.1	1121.1
360	Selcik	38.44	30.29	38.451	38.451	29.719	29.651	Mammal tooth-crown height	8.7	9.7	Tortonian							345.1	1121.1	Eronen et al., 2010									345.1	1121.1
361	Garkin	38.41	30.31	38.422	38.421	29.788	29.74	Mammal tooth-crown height	7.75	8.7	Tortonian							345.1	1121.1	Eronen et al., 2010									345.1	1121.1
362	Sandikli Kinik	38.56	30.13	38.568	38.569	29.812	29.698	Mammal tooth-crown height	4.9	7.25	Messinian							293.6	1069.6	Eronen et al., 2010									293.6	1069.6
363	Bala Yaylaköy	39.74	33.08	39.804	39.808	32.517	32.465	Mammal tooth-crown height	7.75	8.7	Tortonian							345.1	1121.1	Eronen et al., 2010									345.1	1121.1
364	Karacahasan	39.86	33.24	39.927	39.931	32.673	32.621	Mammal tooth-crown height	7.75	8.7	Tortonian							293.6	1069.6	Eronen et al., 2010									293.6	1069.6
365	Eminova	40.11	31.95	40.152	40.155	31.374	31.322	Mammal tooth-crown height	7.75	8.7	Tortonian							345.1	1121.1	Eronen et al., 2010									345.1	1121.1
366	Basbereket	40.07	32.38	40.12	40.123	31.806	31.753	Mammal tooth-crown height	7.75	8.7	Tortonian							345.1	1121.1	Eronen et al., 2010									345.1	1121.1
367	Pinaryaka	41.19	32.49	41.235	41.242	31.989	31.879	Mammal tooth-crown height	7.25	7.75	Tortonian							345.1	1121.1	Eronen et al., 2010									345.1	1121.1
368	Kavakdere (Turolian)	40.24	32.56	40.286	40.294	32.085	31.98	Mammal tooth-crown height	7.25	7.75	Tortonian							345.1	1121.1	Eronen et al., 2010									345.1	1121.1
369	Inönü 2	40.22	32.59	40.283	40.291	31.882	31.798	Mammal tooth-crown height	9.7	11.1	Tortonian							345.1	1121.1	Eronen et al., 2010									345.1	1121.1
370	Amasya 2	37.65	28.48	37.639	37.633	28.179	28.072	Mammal tooth-crown height	4.9	7.25	Messinian							293.6	1069.6	Eronen et al., 2010									293.6	1069.6
371	Incirlikdere	40.09	26.21	40.016	40.006	25.586	25.511	Mammal tooth-crown height	8.7	9.7	Tortonian							293.6	1069.6	Eronen et al., 2010									293.6	1069.6
372	Musaköy	40.19	26.52	40.129	40.122	25.944	25.892	Mammal tooth-crown height	7.75	8.7	Tortonian							345.1	1121.1	Eronen et al., 2010									345.1	1121.1
373	Gülpinar 3	39.51	26.08	39.455	39.441	25.626	25.526	Mammal tooth-crown height	7.25	7.75	Tortonian							345.1	1121.1	Eronen et al., 2010									345.1	1121.1
374	Corakyerler	40.6	33.63	40.674	40.679	33.039	32.985	Mammal tooth-crown height	7.75	8.7	Tortonian							293.6	1069.6	Eronen et al., 2010									293.6	1069.6
375	Karacay	40.2	34.27	40.286	40.292	33.693	33.64	Mammal tooth-crown height	7.75	8.7	Tortonian							345.1	1121.1	Eronen et al., 2010									345.1	1121.1
376	Sazak	37.29	28.83	37.278	37.274	28.43	28.343	Mammal tooth-crown height	7.25	7.75	Tortonian							345.1	1121.1	Eronen et al., 2010									345.1	1121.1
377	Sabuncubaglari 1	41.68	26.59	41.62	41.613	25.964	25.908	Mammal tooth-crown height	7.75	8.7	Tortonian							345.1	1121.1	Eronen et al., 2010									345.1	1121.1
378	Dadasun 1	38.81	35.55	38.921	38.929	35.018	34.97	Mammal tooth-crown height	7.75	8.7	Tortonian							345.1	1121.1	Eronen et al., 2010									345.1	1121.1
379	Cevril 1	38.93	35.46	39.039	39.047	34.925	34.876	Mammal tooth-crown height	7.75	8.7	Tortonian							345.1	1121.1	Eronen et al., 2010									345.1	1121.1
380	Domuzdere	41.74	27.13	41.69	41.684	26.502	26.445	Mammal tooth-crown height	7.75	8.7	Tortonian							345.1	1121.1	Eronen et al., 2010									345.1	1121.1
381	Mahmutlu	39.44	34.52	39.538	39.548	33.917	33.845	Mammal tooth-crown height	8.7	9.7	Tortonian							345.1	1121.1	Eronen et al., 2010									345.1	1121.1
382	Kizilören	37.85	32.1	37.89	37.896	31.686	31.595	Mammal tooth-crown height	7.25	7.75	Tortonian							345.1	1121.1	Eronen et al., 2010									345.1	1121.1
383	Asagicigil 2	38.04	31.82	38.08	38.083	31.309	31.263	Mammal tooth-crown height	7.75	8.7	Tortonian							0	588.9	Eronen et al., 2010									0	588.9
384	Kayadibi 3	37.59	32.26	37.639	37.642	31.763	31.718	Mammal tooth-crown height	7.75	8.7	Tortonian							345.1	1121.1	Eronen et al., 2010									345.1	1121.1
385	Harmancik	39.71	29.2	39.698	39.695	28.586	28.513	Mammal tooth-crown height	8.7	9.7	Tortonian							0	588.9	Eronen et al., 2010									0	588.9
386	Serefköy	37.36	28.23	37.339	37.332	27.829	27.741	Mammal tooth-crown height	7.25	7.75	Tortonian							293.6	1069.6	Eronen et al., 2010									293.6	1069.6
387	Salihpasalar 1	37.25	28.25	37.229	37.223	27.852	27.764	Mammal tooth-crown height	7.25	7.75	Tortonian							11.7	787.7	Eronen et al., 2010									11.7	787.7
388	Salihpasalar 2	37.25	28.26	37.23	37.223	27.862	27.774	Mammal tooth-crown height	7.25	7.75	Tortonian							345.1	1121.1	Eronen et al., 2010									345.1	1121.1
389	Elekci	37.34	28.17	37.318	37.311	27.769	27.681	Mammal tooth-crown height	7.25	7.75	Tortonian							11.7	787.7	Eronen et al., 2010									11.7	787.7
390	Özluce	37.24	28.52	37.224	37.218	28.122	28.034	Mammal tooth-crown height	7.25	7.75	Tortonian							0	588.9	Eronen et al., 2010									0	588.9
391	Yeniyaylacik	38.77	34.61	38.87	38.88	34.03	33.96	Mammal tooth-crown height	8.7	9.7	Tortonian							345.1	1121.1	Eronen et al., 2010									345.1	1121.1
392	Taskinpasa 1	38.49	34.94	38.554	38.574	34.625	34.512	Mammal tooth-crown height	4.9	7.25	Messinian							293.6	1069.6	Eronen et al., 2010									293.6	1069.6
393	Haliminhani 4	39.73	36.83	39.865	39.875	36.271	36.22	Mammal tooth-crown height	7.75	8.7	Tortonian							345.1	1121.1	Eronen et al., 2010									345.1	1121.1
394	Sarihasan	39.78	36.82	39.915	39.925	36.26	36.208	Mammal tooth-crown height	7.75	8.7	Tortonian							11.7	787.7	Eronen et al., 2010									11.7	787.7
395	Düzyayla	39.92	37.31	40.04	40.064	36.848	36.746	Mammal tooth-crown height	7.25	7.75	Tortonian							345.1	1121.1	Eronen et al., 2010									345.1	1121.1
396	Yulafli (CY)	41.2	27.82	41.159	41.152	27.154	27.075	Mammal tooth-crown height	8.7	9.7	Tortonian							1017	1793	Eronen et al., 2010									1017	1793
397	Arapli (Igdebaglar)	40.65	27.14	40.587	40.577	26.418	26.332	Mammal tooth-crown height	9.7	11.1	Tortonian							345.1	1121.1	Eronen et al., 2010									345.1	1121.1
398	Kemiklitepe 1,2	38.39	29.14	38.383	38.379	28.713	28.619	Mammal tooth-crown height	7.25	7.75	Tortonian							293.6	1069.6	Eronen et al., 2010									293.6	1069.6
399	Akcaköy (1-6)	38.57	29.1	38.553	38.55	28.457	28.382	Mammal tooth-crown height	9.7	11.1	Tortonian							1017	1793	Eronen et al., 2010									1017	1793
400	Akkasdagi	38.49	33.64	38.553	38.565	33.211	33.116	Mammal tooth-crown height	7.25	7.75	Tortonian							293.6	1069.6	Eronen et al., 2010									293.6	1069.6
401	Karatchok Dagh	37.06	42.22	35.918	35.683	42.054	42.011	Mammal tooth-crown height	7.25	7.75	Tortonian							345.1	1121.1	Eronen et al., 2010									345.1	1121.1
402	Toros-Menalla	16.24	16.25	15.812	15.663	16.186	16.164	Mammal tooth-crown height	4.9	7.25	Messinian							11.7	787.7	Eronen et al., 2010									11.7	787.7
403	Nyanza 2 (Chamtwara 34)	0.18	35.26	-0.152	-0.267	35.26	35.26	Mammal tooth-crown height	4.9	7.25	Messinian							1017	1793	Eronen et al., 2010									1017	1793
404	Ngorora 9	0.67	36	0.089	0.022	35.996	35.996	Mammal tooth-crown height	8.7	9.7	Tortonian							0	588.9	Eronen et al., 2010									0	588.9
405	Ngorora 12	0.67	36	0.089	0.022	35.996	35.996	Mammal tooth-crown height	8.7	9.7	Tortonian							0	588.9	Eronen et al., 2010									0	588.9
406	Lukeino	0.75	35.86	0.422	0.308	35.856	35.856	Mammal tooth-crown height	4.9	7.25	Messinian							0	588.9	Eronen et al., 2010									0	588.9
407	Lukeino 4	0.75	35.87	0.422	0.308	35.866	35.866	Mammal tooth-crown height	4.9	7.25	Messinian							345.1	1121.1	Eronen et al., 2010									345.1	1121.1
408	Ngeringerowa 1/1003	0.83	35.83	0.247	0.18	35.824	35.824	Mammal tooth-crown height	8.7	9.7	Tortonian							345.1	1121.1	Eronen et al., 2010									345.1	1121.1
409	Inolelo 1	-3.9	33.7	-4.241	-4.359	33.724	33.733	Mammal tooth-crown height	4.9	7.25	Messinian							11.7	787.7	Eronen et al., 2010									11.7	787.7
410	Shoshamagai	-3.58	33.7	-3.921	-4.039	33.722	33.731	Mammal tooth-crown height	4.9	7.25	Messinian							0	588.9	Eronen et al., 2010									0	588.9
411	Langebaanweg 2 (PPM)	-32.95	18.13	-33.37	-33.516	18.286	18.341	Mammal tooth-crown height	4.9	7.25	Messinian							293.6	1069.6	Eronen et al., 2010									293.6	1069.6
412	Langebaanweg 3 (QSM)	-32.95	18.13	-33.37	-33.516	18.286	18.341	Mammal tooth-crown height	4.9	7.25	Messinian							0	588.9	Eronen et al., 2010									0	588.9
413	Mwambiti 3	-4.01	33.78	-4.351	-4.469	33.805	33.814	Mammal tooth-crown height	4.9	7.25	Messinian							345.1	1121.1	Eronen et al., 2010									345.1	1121.1
414	Inolelo 3	-3.9	33.73	-4.241	-4.359	33.754	33.763	Mammal tooth-crown height	4.9	7.25	Messinian							345.1	1121.1	Eronen et al., 2010									345.1	1121.1
415	Darayaspoon	38.66	69.86	38.605	38.6	69.535	69.506	Mammal tooth-crown height	7.75	8.7	Tortonian							345.1	1121.1	Eronen et al., 2010									345.1	1121.1
416	Marmar	39.33	67.83	39.886	40.004	67.531	67.462	Mammal tooth-crown height	7.25	7.75	Tortonian							345.1	1121.1	Eronen et al., 2010									345.1	1121.1
417	Hangmon	21	103.9	21.248	21.273	105.049	105.151	Mammal tooth-crown height	7.75	8.7	Tortonian							11.7	787.7	Eronen et al., 2010									11.7	787.7
418	Nombrevilla-9	41.11	-1.35	40.425	40.33	-1.916	-2	Mammal tooth-crown height	9.7	11.1	Tortonian							345.1	1121.1	Eronen et al., 2010									345.1	1121.1
419	Salihpasalar	37.25	28.27	37.23	37.223	27.872	27.784	Mammal tooth-crown height	7.25	7.75	Tortonian							293.6	1069.6	Eronen et al., 2010									293.6	1069.6
420	Kalimantsi-Pehtsata	42.5	23.1	42.398	42.374	22.568	22.453	Mammal tooth-crown height	7.25	7.75	Tortonian							345.1	1121.1	Eronen et al., 2010									345.1	1121.1
421	Binxian	35.05	108.05	35.83	35.998	107.273	107.102	Mammal tooth-crown height	7.25	7.75	Tortonian							345.1	1121.1	Eronen et al., 2010									345.1	1121.1
422	Dongxiang-wangji	35.61	103.61	36.163	36.28	102.976	102.989	Mammal tooth-crown height	9.7	11.1	Tortonian							0	588.9	Eronen et al., 2010									0	588.9
423	Fugu-Laogaochuan-wangdafuliang	39	111	39.991	40.107	110.095	109.986	Mammal tooth-crown height	8.7	9.7	Tortonian							293.6	1069.6	Eronen et al., 2010									293.6	1069.6
424	Fu-Ku-Lok.51	39	111	39.748	39.909	110.32	110.17	Mammal tooth-crown height	7.25	7.75	Tortonian							293.6	1069.6	Eronen et al., 2010									293.6	1069.6
425	Hsin-An-Loc.12	34.6	112.2	35.325	35.584	111.511	111.266	Mammal tooth-crown height	4.9	7.25	Messinian							345.1	1121.1	Eronen et al., 2010									345.1	1121.1
426	Huade-Heishatou	42	114	42.565	42.685	113.445	113.323	Mammal tooth-crown height	7.25	7.75	Tortonian							293.6	1069.6	Eronen et al., 2010									293.6	1069.6
427	Huade-Tuchetse	42	114	42.565	42.685	113.445	113.323	Mammal tooth-crown height	7.25	7.75	Tortonian							293.6	1069.6	Eronen et al., 2010									293.6	1069.6
428	Jilong	28.86	85.18	27.116	26.726	86.619	86.913	Mammal tooth-crown height	7.25	7.75	Tortonian							11.7	787.7	Eronen et al., 2010									11.7	787.7
429	Jingmen-Yangjiaji-Dingjiapo	31	112	31.841	32.021	112.081	112.096	Mammal tooth-crown height	7.25	7.75	Tortonian							11.7	787.7	Eronen et al., 2010									11.7	787.7
430	Jungar-Yaogou	40	112	40.736	40.896	111.35	111.207	Mammal tooth-crown height	7.25	7.75	Tortonian							293.6	1069.6	Eronen et al., 2010									293.6	1069.6
431	Qingyang-Lok.115	36	108	36.577	36.78	107.438	107.238	Mammal tooth-crown height	4.9	7.25	Messinian							345.1	1121.1	Eronen et al., 2010									345.1	1121.1
432	Qingyang-Lok.116	36	108	36.577	36.78	107.438	107.238	Mammal tooth-crown height	4.9	7.25	Messinian							345.1	1121.1	Eronen et al., 2010									345.1	1121.1
433	Lantian-12	34	109	35.623	35.783	107.514	107.496	Mammal tooth-crown height	9.7	11.1	Tortonian							0	588.9	Eronen et al., 2010									0	588.9
434	Lantian-30	34	109	35.331	35.451	107.78	107.671	Mammal tooth-crown height	7.75	8.7	Tortonian							0	588.9	Eronen et al., 2010									0	588.9
435	Lantian-42	34	109	34.806	35.092	108.26	107.998	Mammal tooth-crown height	4.9	7.25	Messinian							293.6	1069.6	Eronen et al., 2010									293.6	1069.6
436	Lantian-44	34	109	34.806	35.092	108.26	107.998	Mammal tooth-crown height	4.9	7.25	Messinian							345.1	1121.1	Eronen et al., 2010									345.1	1121.1
437	Lantian-shuijiazui-L1(s5)	34	109	35.623	35.783	107.514	107.496	Mammal tooth-crown height	9.7	11.1	Tortonian							293.6	1069.6	Eronen et al., 2010									293.6	1069.6
438	Lantian-shuijiazui-L4(s6)	34	109	35.623	35.783	107.514	107.496	Mammal tooth-crown height	9.7	11.1	Tortonian							293.6	1069.6	Eronen et al., 2010									293.6	1069.6
439	Lantian-shuijiazui-s4	34	109	35.623	35.783	107.514	107.496	Mammal tooth-crown height	9.7	11.1	Tortonian							0	588.9	Eronen et al., 2010									0	588.9
440	Pao-Te-Lok.108	39	111	39.553	39.748	110.5	110.32	Mammal tooth-crown height	4.9	7.25	Messinian							345.1	1121.1	Eronen et al., 2010									345.1	1121.1
441	Pao-Te-Lok.109	39	111	39.553	39.748	110.5	110.32	Mammal tooth-crown height	4.9	7.25	Messinian							345.1	1121.1	Eronen et al., 2010									345.1	1121.1
442	Pao-Te-Lok.110	39	111	39.553	39.748	110.5	110.32	Mammal tooth-crown height	4.9	7.25	Messinian							293.6	1069.6	Eronen et al., 2010									293.6	1069.6
443	Pao-Te-Lok.30	39	111	39.553	39.748	110.5	110.32	Mammal tooth-crown height	4.9	7.25	Messinian							293.6	1069.6	Eronen et al., 2010									293.6	1069.6
444	Pao-Te-Lok.31	39	111	39.553	39.748	110.5	110.32	Mammal tooth-crown height	4.9	7.25	Messinian							345.1	1121.1	Eronen et al., 2010									345.1	1121.1
445	Pao-Te-Lok.43	39	111	39.553	39.748	110.5	110.32	Mammal tooth-crown height	4.9	7.25	Messinian							345.1	1121.1	Eronen et al., 2010									345.1	1121.1
446	Pao-Te-Lok.44	39	111	39.553	39.748	110.5	110.32	Mammal tooth-crown height	4.9	7.25	Messinian							293.6	1069.6	Eronen et al., 2010									293.6	1069.6
447	Pao-Te-Lok.49	39	111	39.553	39.748	110.5	110.32	Mammal tooth-crown height	4.9	7.25	Messinian							1017	1793	Eronen et al., 2010									1017	1793
448	Pao-Te-Lok.52	39	111	39.553	39.748	110.5	110.32	Mammal tooth-crown height	4.9	7.25	Messinian							345.1	1121.1	Eronen et al., 2010									345.1	1121.1
449	Qinan-Chenggoucun	35	106	35.51	35.555	105.514	105.47	Mammal tooth-crown height	7.75	8.7	Tortonian							11.7	787.7	Eronen et al., 2010									11.7	787.7
450	Songshan-Loc.2	36.96	103.29	37.234	37.329	102.944	102.821	Mammal tooth-crown height	4.9	7.25	Messinian							345.1	1121.1	Eronen et al., 2010									345.1	1121.1
451	Songshan-Loc.3	36.96	103.27	37.233	37.328	102.924	102.801	Mammal tooth-crown height	4.9	7.25	Messinian							345.1	1121.1	Eronen et al., 2010									345.1	1121.1
452	Wudu-longjiagou	33.66	105	34.062	34.148	104.634	104.554	Mammal tooth-crown height	7.25	7.75	Tortonian							11.7	787.7	Eronen et al., 2010									11.7	787.7
453	Wu-Hsiang-Loc.71	36.8	112.8	37.509	37.761	112.202	111.989	Mammal tooth-crown height	4.9	7.25	Messinian							345.1	1121.1	Eronen et al., 2010									345.1	1121.1
454	Wu-Hsiang-loc.78	36.8	112.9	37.506	37.758	112.303	112.091	Mammal tooth-crown height	4.9	7.25	Messinian							345.1	1121.1	Eronen et al., 2010									345.1	1121.1
455	Wu-Hsiang-Lok.70	36.8	112.9	37.506	37.758	112.303	112.091	Mammal tooth-crown height	4.9	7.25	Messinian							345.1	1121.1	Eronen et al., 2010									345.1	1121.1
456	Wu-Hsiang-Lok.73	36.8	112.9	37.506	37.758	112.303	112.091	Mammal tooth-crown height	4.9	7.25	Messinian							1017	1793	Eronen et al., 2010									1017	1793
457	Zhangqiu-Balouhe	36.66	117.46	37.642	37.854	116.63	116.448	Mammal tooth-crown height	7.25	7.75	Tortonian							345.1	1121.1	Eronen et al., 2010									345.1	1121.1
458	Fugu-Laogaochuan-lamagou	39	111	39.991	40.107	110.095	109.986	Mammal tooth-crown height	8.7	9.7	Tortonian							293.6	1069.6	Eronen et al., 2010									293.6	1069.6
459	Fugu-Laogaochuan-miaoliang	39	111	39.553	39.748	110.5	110.32	Mammal tooth-crown height	4.9	7.25	Messinian							1017	1793	Eronen et al., 2010									1017	1793
460	Bahe	33.4	109.1	33.981	34.032	108.687	108.649	Mammal tooth-crown height	7.75	8.7	Tortonian							293.6	1069.6	Eronen et al., 2010									293.6	1069.6
461	Santiga (Sabadell)	41.55	2.1	40.934	40.85	1.484	1.392	Mammal tooth-crown height	9.7	11.1	Tortonian							1017	1793	Eronen et al., 2010									1017	1793
462	Creu Conill 20	41.67	2	41.052	40.967	1.38	1.289	Mammal tooth-crown height	9.7	11.1	Tortonian							11.7	787.7	Eronen et al., 2010									11.7	787.7
463	Baynunah	24.16	52.56	22.778	22.499	51.848	51.7	Mammal tooth-crown height	7.25	7.75	Tortonian							345.1	1121.1	Eronen et al., 2010									345.1	1121.1
464	Perivolaki	38.41	23.5	37.873	37.758	23.228	23.171	Mammal tooth-crown height	7.25	7.75	Tortonian							293.6	1069.6	Eronen et al., 2010									293.6	1069.6
465	Samos-Qx	37.75	26.97	37.698	37.692	26.47	26.425	Mammal tooth-crown height	7.75	8.7	Tortonian							293.6	1069.6	Eronen et al., 2010									293.6	1069.6
466	Samos-Q6	37.75	26.97	37.698	37.692	26.47	26.425	Mammal tooth-crown height	7.75	8.7	Tortonian							293.6	1069.6	Eronen et al., 2010									293.6	1069.6
467	Samos-Q5	37.75	26.97	37.709	37.698	26.56	26.47	Mammal tooth-crown height	7.25	7.75	Tortonian							345.1	1121.1	Eronen et al., 2010									345.1	1121.1
468	Kerassia 1	38.5	23	37.96	37.845	22.731	22.675	Mammal tooth-crown height	7.25	7.75	Tortonian							345.1	1121.1	Eronen et al., 2010									345.1	1121.1
469	Kerassia 4	38.5	23	37.96	37.845	22.731	22.675	Mammal tooth-crown height	7.25	7.75	Tortonian							345.1	1121.1	Eronen et al., 2010									345.1	1121.1
470	Kocherinovo 1	42	23.08	41.873	41.861	22.45	22.393	Mammal tooth-crown height	7.75	8.7	Tortonian							293.6	1069.6	Eronen et al., 2010									293.6	1069.6
471	Kocherinovo 2	42.03	23.08	41.903	41.891	22.449	22.392	Mammal tooth-crown height	7.75	8.7	Tortonian							11.7	787.7	Eronen et al., 2010									11.7	787.7
472	Strumyani 1	42.83	23.08	42.703	42.69	22.421	22.362	Mammal tooth-crown height	7.75	8.7	Tortonian							0	588.9	Eronen et al., 2010									0	588.9
473	Strumyani 2	42.83	23.1	42.703	42.691	22.441	22.382	Mammal tooth-crown height	7.75	8.7	Tortonian							11.7	787.7	Eronen et al., 2010									11.7	787.7
474	Ravin X	38.4	23.48	37.862	37.748	23.208	23.151	Mammal tooth-crown height	7.25	7.75	Tortonian							345.1	1121.1	Eronen et al., 2010									345.1	1121.1
475	Mytilinii 4	37.75	26.96	37.709	37.698	26.55	26.46	Mammal tooth-crown height	7.25	7.75	Tortonian							293.6	1069.6	Eronen et al., 2010									293.6	1069.6
476	Mytilinii 3	37.75	26.96	37.709	37.698	26.55	26.46	Mammal tooth-crown height	7.25	7.75	Tortonian							0	588.9	Eronen et al., 2010									0	588.9
477	Mytilinii 1A	37.75	26.96	37.709	37.698	26.55	26.46	Mammal tooth-crown height	7.25	7.75	Tortonian							293.6	1069.6	Eronen et al., 2010									293.6	1069.6
478	Mytilinii 1B	37.75	26.96	37.709	37.698	26.55	26.46	Mammal tooth-crown height	7.25	7.75	Tortonian							0	588.9	Eronen et al., 2010									0	588.9
479	Mytilinii 1C	37.75	26.96	37.709	37.698	26.55	26.46	Mammal tooth-crown height	7.25	7.75	Tortonian							345.1	1121.1	Eronen et al., 2010									345.1	1121.1
480	Achmet Aga	38.41	23.5	37.873	37.758	23.228	23.171	Mammal tooth-crown height	7.25	7.75	Tortonian							0	588.9	Eronen et al., 2010									0	588.9
481	Ravin Ar.	38.41	23.48	37.872	37.758	23.208	23.151	Mammal tooth-crown height	7.25	7.75	Tortonian							345.1	1121.1	Eronen et al., 2010									345.1	1121.1
482	Irrawaddy 1	22.93	94.1	19.465	19.174	95.331	95.48	Mammal tooth-crown height	7.75	8.7	Tortonian							345.1	1121.1	Eronen et al., 2010									345.1	1121.1
483	Guanghe-zhuangheji-LX200019	35.5	103.5	35.873	35.953	103.075	102.983	Mammal tooth-crown height	7.25	7.75	Tortonian							345.1	1121.1	Eronen et al., 2010									345.1	1121.1
484	Hezheng-hetuo-LX200023	35.46	103.16	35.827	35.905	102.735	102.643	Mammal tooth-crown height	7.25	7.75	Tortonian							345.1	1121.1	Eronen et al., 2010									345.1	1121.1
485	Hezheng-heilingding-LX200035	35.33	103.16	35.697	35.775	102.739	102.647	Mammal tooth-crown height	7.25	7.75	Tortonian							345.1	1121.1	Eronen et al., 2010									345.1	1121.1
486	Guonigou	35.83	103.75	36.387	36.504	103.108	103.12	Mammal tooth-crown height	9.7	11.1	Tortonian							0	588.9	Eronen et al., 2010									0	588.9
487	Hezheng-Dashengou	35.85	103.73	36.348	36.406	103.154	103.087	Mammal tooth-crown height	8.7	9.7	Tortonian							1017	1793	Eronen et al., 2010									1017	1793
488	Yangjiashan	35.86	103.76	36.319	36.359	103.232	103.184	Mammal tooth-crown height	7.75	8.7	Tortonian							345.1	1121.1	Eronen et al., 2010									345.1	1121.1
489	Yushe	37	113	37.954	38.163	112.203	112.028	Mammal tooth-crown height	7.25	7.75	Tortonian							1551	2327	Eronen et al., 2010									1551	2327
490	Thermopigi	41.28	23.36	41.182	41.159	22.862	22.753	Mammal tooth-crown height	7.25	7.75	Tortonian							293.6	1069.6	Eronen et al., 2010									293.6	1069.6
491	Lushi-Redclay	34	111	35.025	35.249	110.022	109.809	Mammal tooth-crown height	7.25	7.75	Tortonian							345.1	1121.1	Eronen et al., 2010									345.1	1121.1
492	Jingning	35.5	105.66	35.914	36.002	105.245	105.155	Mammal tooth-crown height	7.25	7.75	Tortonian							11.7	787.7	Eronen et al., 2010									11.7	787.7
493	Huachi	36.5	108	37.28	37.449	107.246	107.08	Mammal tooth-crown height	7.25	7.75	Tortonian							0	588.9	Eronen et al., 2010									0	588.9
494	Xili	34.08	105.08	34.484	34.57	104.703	104.62	Mammal tooth-crown height	7.25	7.75	Tortonian							0	588.9	Eronen et al., 2010									0	588.9
495	Chongxin	35.33	0	34.696	34.562	-0.072	-0.087	Mammal tooth-crown height	7.25	7.75	Tortonian							0	588.9	Eronen et al., 2010									0	588.9
496	Wenquan-dakusitai	45	81	45.702	45.851	80.718	80.651	Mammal tooth-crown height	7.25	7.75	Tortonian							345.1	1121.1	Eronen et al., 2010									345.1	1121.1
497	Huoxian-anlecun	36.48	111.66	37.221	37.381	110.942	110.784	Mammal tooth-crown height	7.25	7.75	Tortonian							11.7	787.7	Eronen et al., 2010									11.7	787.7
498	Guide-heerjia	36	101.5	36.278	36.334	100.74	100.579	Mammal tooth-crown height	7.25	7.75	Tortonian							345.1	1121.1	Eronen et al., 2010									345.1	1121.1
499	Guanghe-sigou	35.48	103.5	35.973	36.03	102.937	102.871	Mammal tooth-crown height	8.7	9.7	Tortonian							345.1	1121.1	Eronen et al., 2010									345.1	1121.1
500	Qaidam-shenggou	37.08	97.25	37.195	37.203	96.239	96.152	Mammal tooth-crown height	7.75	8.7	Tortonian							11.7	787.7	Eronen et al., 2010									11.7	787.7
501	Beticha	8.86	40.3	8.246	8.15	39.973	39.922	Mammal tooth-crown height	9.7	11.1	Tortonian							11.7	787.7	Eronen et al., 2010									11.7	787.7
502	Nurpur	32	77	30.652	30.157	78.465	78.952	Mammal tooth-crown height	4.9	7.25	Messinian							11.7	787.7	Eronen et al., 2010									11.7	787.7
503	Zinda pir 4	30.06	70.06	28.456	28.301	72.338	72.53	Mammal tooth-crown height	7.75	8.7	Tortonian							11.7	787.7	Eronen et al., 2010									11.7	787.7
504	Sivas	39.73	36.81	39.843	39.864	36.352	36.251	Mammal tooth-crown height	7.25	7.75	Tortonian							345.1	1121.1	Eronen et al., 2010									345.1	1121.1
505	Melka el Ouidane	34.55	-3	33.911	33.776	-3.047	-3.057	Mammal tooth-crown height	7.25	7.75	Tortonian							0	588.9	Eronen et al., 2010									0	588.9
506	Haritalyangar	31.52	76.63	29.088	28.786	79.114	79.381	Mammal tooth-crown height	8.7	9.7	Tortonian							345.1	1121.1	Eronen et al., 2010									345.1	1121.1
507	Malm	10.2	40.41	9.901	9.797	40.343	40.32	Mammal tooth-crown height	4.9	7.25	Messinian							1038	1814	Eronen et al., 2010									1038	1814
508	Tinau khola	28	82.5	25.024	24.664	84.362	84.557	Mammal tooth-crown height	8.7	9.7	Tortonian							345.1	1121.1	Eronen et al., 2010									345.1	1121.1
509	C-136A	43.493	28.246	43.453	43.445	27.383	27.273	Co-existence Approach	10	11.6	Tortonian	13.25	17.25					502	902	Ivanov et al., 2007a			13.25	17.25					502	902
510	Cerro Jancocata	-17.335	-69.135	-18.837	-18.857	-65.838	-65.789	Leaf morphology (leaf physiognomy)	10.6	10.72	Tortonian	16.1	23.5							Gregory-Wodzicki et al., 1998	Gregory-Wodzicki, 2002		16.1	23.5
511	Chuitna River	61.221	-151.196	61.961	62.205	-147.547	-145.939	CLAMP (leaf physiognomy)	8	11.3	Tortonian	1	7							Wolfe, 1994a			1	7
512	Drenovets C-1	43.5	23.2	43.388	43.34	22.583	22.348	Co-existence Approach	7.25	10	Tortonian	14.35	18.35					579	1929	Ivanov et al., 2002			14.35	18.35					579	1929
513	Elazig	38.68	39.23	38.881	38.902	38.64	38.577	Co-existence Approach	9	10	Tortonian	15.6	21.3	5	13.3	24.4	28.4	823	1574	Akgün et al., 2007			15.6	21.3	5	13.3	24.4	28.4	823	1574
514	Hog Creek 635	44.29	-117.092	44.401	44.404	-114.722	-112.409	Modern equivalent approach	6	11.8	Messinian	12	16					435	835	Dorf, 1938			12	16					435	835
516	Homer	59.667	-151.682	60.143	60.583	-149.489	-147.221	Nearest living relative	5	10	Messinian	8.5	12.5			16.5	20.5			Reinink-Smith and Leopold, 2005			8.5	12.5			16.5	20.5
517	Kapturo	0.917	35.833	0.468	0.435	35.827	35.827	Leaf morphology (leaf physiognomy)	6.7	7.2	Messinian	19.2	24.2							Jacobs and Deino, 1996			19.2	24.2
518	Kimble Homestead	44.5	-119.633	44.673	44.677	-116.746	-116.667	Palaeosol Analysis	7.3	7.5	Tortonian							759	1041	Retallack et al., 2002									759	1041
519	Kimble Homestead	44.5	-119.633	44.671	44.673	-116.786	-116.746	Palaeosol Analysis	7.2	7.3	Messinian							500	850	Retallack et al., 2002									500	850
520	Legler Lignite	40.034	-74.333	39.137	39.031	-70.64	-70.3	Nearest living relative	11	11	Tortonian	6	24					1070	1470	Greller and Rachele, 1983			6	24					1070	1470
521	Luhe Coal Mine	25.167	101.367	25.48	25.825	101.654	101.993	Co-existence Approach	5.33	11.25	Messinian	13.3	20.9	2.5	12.6	22.5	27.5	803.6	1254.7	Xu et al., 2008			13.3	20.9	2.5	12.6	22.5	27.5	803.6	1254.7
522	Mt. Reba	38.508	-120.029	38.684	38.684	-117.446	-117.446	Nearest living relative	7	7	Messinian	11.3	15.3					816	1216	Axelrod, 1980			11.3	15.3					816	1216
523	Pickett Creek	43.053	-116.468	43.182	43.176	-113.156	-112.369	CLAMP (leaf physiognomy)	8.5	10.5	Tortonian	10.4	16.4	-0.2	5.8	20	28			Beuchler et al., 2007			10.4	16.4	-0.2	5.8	20	28
524	Pislepampa	-17.183	-66.033	-17.975	-18.106	-64.308	-64.027	Nearest living relative	6	7	Messinian	15	25					1000	1500	Graham et al., 2001			15	25					1000	1500
525	Sivas-Hafik	39.28	38.35	39.444	39.462	37.808	37.737	Co-existence Approach	8	9	Tortonian	16.5	20.8	5.5	13.3	25.7	29.7	887	1520	Akgün et al., 2007			16.5	20.8	5.5	13.3	25.7	29.7	887	1520
526	Tagus Basin	38.699	-9.083	37.869	37.759	-9.486	-9.542	Leaf physiognomy	9.7	11.1	Tortonian	8	14							Antunes and Pais, 1984			8	14
527	Tanaro River	44.717	8.1	44.434	44.419	7.636	7.611	Leaf morphology (leaf physiognomy)	5.7	6	Messinian	11.5	17.5					847	1759	Martinetto et al., 2007			11.5	17.5					847	1759
528	Tatlanika Creek	63.302	-144.573	63.739	64.008	-141.922	-140.109	Nearest living relative	5.4	9	Messinian	3	7							Leopold and Liu, 1994	Grimaldi and Triplehorn, 2008		3	7
529	Trapper Creek	42.097	-113.889	42.174	42.12	-110.417	-109.324	Nearest living relative	9	11.8	Tortonian	7	15					1006.5	1406.5	Leopold and Denton, 1987	Axelrod, 1964		7	15					1006.5	1406.5
530	Upper Jakokkota	-17.257	-69.441	-18.763	-18.783	-66.148	-66.099	Leaf morphology (leaf physiognomy)	10.6	10.72	Tortonian	20.3	25.7					380	740	Gregory-Wodzicki, 2002			20.3	25.7					380	740
531	Vegora	40.682	21.709	40.239	40.08	21.482	21.401	Co-existence Approach	4.9	7.25	Messinian	11.95	15.95	0.4	4.5	22.2	26.2	757.5	1157.5	Kvacek et al., 2002b			11.95	15.95	0.4	4.5	22.2	26.2	757.5	1157.5
532	Velikaya Began 856 well	48.23	22.67	48.142	48.111	22.09	21.904	Co-existence Approach	5.4	7.1	Messinian	12	16					725	1125	Syabryaj et al., 2007			12	16					725	1125
533	Velikaya Began 856 well	48.23	22.67	48.111	48.029	21.904	21.458	Co-existence Approach	7.1	11.5	Messinian	12.7	17.7					950	1350	Syabryaj et al., 2007			12.7	17.7					950	1350
534	Xiolongtan coalmine	23.813	103.198	24.464	24.634	103.787	103.978	Leaf Margin Analysis	9	11.6	Tortonian	19.3	25.3							Xia et al., 2009			19.3	25.3
535	Polgardi 2	47.05	18.3	46.908	46.886	17.768	17.687	Herpetofaunal Composition	5.35	6.15	Messinian							79	629	Freudenthal and Kordos, 1989	Böhme et al., 2008								79	629
536	Polgardi 4	47.05	18.3	46.887	46.867	17.692	17.622	Herpetofaunal Composition	6.1	6.8	Messinian							165	715	Freudenthal and Kordos, 1989	Böhme et al., 2008								165	715
537	Tardosbánya 3	47.6667	18.45	47.486	47.46	17.75	17.656	Herpetofaunal Composition	6.8	7.7	Messinian							106	656	Fejfar et al., 1997	Böhme et al., 2008								106	656
538	Csákvár	47.4	18.5	47.197	47.162	17.726	17.602	Herpetofaunal Composition	7.6	8.8	Tortonian							312	862	Fejfar et al., 1997	Kretzoi, 1951	Böhme et al., 2008							312	862
539	Dorn–Dürkheim	49.7686	8.2697	49.378	49.325	7.444	7.337	Herpetofaunal Composition	7.8	8.8	Tortonian							804	1354	Franzen, 1997	Böhme et al., 2008								804	1354
540	Prottes	48.33	16.75	48.09	48.056	15.926	15.819	Herpetofaunal Composition	7.8	8.8	Tortonian							598	1148	Harzhauser et al., 2004	Böhme et al., 2008								598	1148
541	Kohfidisch	47.16	16.35	46.887	46.873	15.499	15.458	Herpetofaunal Composition	8.55	8.95	Tortonian							336	886	Daxner-Hoeck, 2001	Böhme et al., 2008								336	886
542	Suchomasty	49.9	14.0667	49.571	49.555	13.079	13.034	Herpetofaunal Composition	8.8	9.2	Tortonian							640	1190	Fejfar, 1990	Böhme et al., 2008								640	1190
543	Varnitza	46.8641	29.4692	46.852	46.851	28.506	28.456	Herpetofaunal Composition	9.35	9.85	Tortonian							3	553	Pevnzer and Vangengeim, 1993	Böhme et al., 2008								3	553
544	Kalfa	46.54	29.23	46.522	46.522	28.266	28.229	Herpetofaunal Composition	9.5	9.9	Tortonian							0	500	Pevnzer and Vangengeim, 1993	Böhme et al., 2008								0	500
545	Buzhor 1	46.56	28.16	46.518	46.516	27.196	27.159	Herpetofaunal Composition	9.5	9.9	Tortonian							1103	1653	Mein et al., 1993	Pevnzer and Vangengeim, 1993	Böhme et al., 2008							1103	1653
546	Lapushna	46.9	28.5	46.865	46.864	27.509	27.474	Herpetofaunal Composition	9.6	10	Tortonian							1126	1676	Pevnzer and Vangengeim, 1993	Böhme et al., 2008								1126	1676
547	Maikop	44.6	40.0833	44.83	44.839	39.214	39.183	Herpetofaunal Composition	9.6	10	Tortonian							1205	1755	Böhme et al., 2008									1205	1755
548	Götzendorf	48	16.58	47.69	47.685	15.563	15.55	Herpetofaunal Composition	9.78	9.94	Tortonian							1028	1578	Daxner-Hoeck, 2001	Harzhauser et al., 2004	Böhme et al., 2008							1028	1578
549	Rudabanja	48.3833	20.6333	48.163	48.154	19.563	19.528	Herpetofaunal Composition	9.9	10.3	Tortonian							782	1332	Kretzoi and Fejfar, 2005	Böhme et al., 2008								782	1332
550	Richardhof-Golfplatz	48.0538	16.268	47.727	47.721	15.224	15.207	Herpetofaunal Composition	10.1	10.3	Tortonian							535	1085	Harzhauser et al., 2004	Böhme et al., 2008								535	1085
551	Tartaros	47.15	22.25	46.966	46.957	21.228	21.186	Herpetofaunal Composition	10	10.5	Tortonian							1491	2041	Kretzoi, 1982	Böhme et al., 2008								1491	2041
552	Vösendorf	48.07	16.33	47.74	47.734	15.272	15.255	Herpetofaunal Composition	10.25	10.45	Tortonian							643	1193	Daxner-Hoeck, 2001	Harzhauser et al., 2004	Böhme et al., 2008							643	1193
553	Hammerschmeide 3	47.9258	10.5989	47.432	47.423	9.537	9.521	Herpetofaunal Composition	11	11.2	Tortonian							921	1471	Böhme et al., 2008									921	1471
554	Hammerschmeide 2	47.9258	10.5989	47.43	47.421	9.533	9.518	Herpetofaunal Composition	11.04	11.24	Tortonian							733	1283	Böhme et al., 2008									733	1283
555	Hammerschmeide 1	47.9258	10.5989	47.428	47.42	9.53	9.515	Herpetofaunal Composition	11.08	11.28	Tortonian							699	1249	Böhme et al., 2008									699	1249
556	Gritsev	49.975	27.16	49.898	49.893	25.882	25.823	Herpetofaunal Composition	10.9	11.5	Tortonian							275	825	Harzhauser and Piller, 2004	Harzhauser et al., 2004	Böhme et al., 2008							275	825
557	Petersbuch 14	48.9779	11.1909	48.506	48.464	10.082	9.998	Herpetofaunal Composition	10.8	11.8	Tortonian							77	627	Böhme et al., 2008									77	627
558	Petersbuch 48	48.9779	11.1909	48.497	48.456	10.065	9.981	Herpetofaunal Composition	11	12	Tortonian							0	498.5	Böhme et al., 2008									0	498.5
559	Felsötarkany 1 + 3/2	47.9667	20.4167	47.715	47.693	19.267	19.181	Herpetofaunal Composition	11.1	12.1	Tortonian							97	647	Harzhauser and Piller, 2004	Hir et al., 2001a	Böhme et al., 2008							97	647
561	Peralejos E	40.29	-1.02	39.922	39.922	-1.317	-1.317	Herpetofaunal Composition	5.36	5.36	Messinian							63	613	Van Dam et al., 2001									63	613
562	Lomas de Casares 2	40.35	-1.1	39.974	39.974	-1.403	-1.403	Herpetofaunal Composition	5.46	5.46	Messinian							351	901	Van Dam et al., 2001									351	901
563	Lomas de Casares 3	40.35	-1.1	39.95	39.95	-1.422	-1.422	Herpetofaunal Composition	5.79	5.79	Messinian							233	783	Van Dam et al., 2001									233	783
564	Lomas de Casares 4	40.35	-1.1	39.947	39.947	-1.424	-1.424	Herpetofaunal Composition	5.84	5.84	Messinian							233	783	Van Dam et al., 2001									233	783
565	Arquillo 1	40.4	-1.1	39.969	39.969	-1.447	-1.447	Herpetofaunal Composition	6.23	6.23	Messinian							451	1001	Van Dam et al., 2001									451	1001
566	Villastar	40.2833	-1.15	39.848	39.848	-1.497	-1.497	Herpetofaunal Composition	6.28	6.28	Messinian							375	925	Van Dam et al., 2001									375	925
567	Bunker de Valdecebro 4/5	40.35	-1.0333	39.902	39.902	-1.394	-1.394	Herpetofaunal Composition	6.48	6.48	Messinian							378	928	Van Dam et al., 2001									378	928
568	Valdecebro 3	40.35	-1.0333	39.897	39.897	-1.399	-1.399	Herpetofaunal Composition	6.56	6.56	Messinian							653	1203	Van Dam et al., 2001									653	1203
569	Masada del Valle 7	40.12	-0.26	39.651	39.651	-0.646	-0.646	Herpetofaunal Composition	6.93	6.93	Messinian							174	724	Van Dam et al., 2001									174	724
570	Bunker de Valdecebro 3	40.35	-1.0333	39.87	39.87	-1.42	-1.42	Herpetofaunal Composition	6.94	6.94	Messinian							24	574	Van Dam et al., 2001									24	574
571	La Gloria 6	40.23	-5.48	39.679	39.679	-5.836	-5.836	Herpetofaunal Composition	7.06	7.06	Messinian							0	521.5	Van Dam et al., 2001									0	521.5
572	Valdecebro 5	40.35	-1.03	39.86	39.86	-1.424	-1.424	Herpetofaunal Composition	7.07	7.07	Messinian							240	790	Van Dam et al., 2001									240	790
573	Concud	40.4	-1.13	39.908	39.908	-1.526	-1.526	Herpetofaunal Composition	7.09	7.09	Messinian							327	877	Van Dam et al., 2001									327	877
574	Concud 3	40.3833	-1.1333	39.89	39.89	-1.529	-1.529	Herpetofaunal Composition	7.1	7.1	Messinian							407	957	Van Dam et al., 2001									407	957
575	Los Mansuetos	40.4	-1.1	39.907	39.907	-1.497	-1.497	Herpetofaunal Composition	7.11	7.11	Messinian							296	846	Van Dam et al., 2001									296	846
576	Aljezar B	40.34	-1.09	39.846	39.846	-1.486	-1.486	Herpetofaunal Composition	7.12	7.12	Messinian							166	716	Van Dam et al., 2001									166	716
577	Toril	41.1333	-1.3833	40.634	40.634	-1.798	-1.798	Herpetofaunal Composition	7.13	7.13	Messinian							166	716	Van Dam et al., 2001									166	716
578	Villalba Baja 2B	40.4333	-1.0833	39.938	39.938	-1.483	-1.483	Herpetofaunal Composition	7.14	7.14	Messinian							166	716	Van Dam et al., 2001									166	716
579	El Regajo 4	40.95	-1.2333	40.452	40.452	-1.645	-1.645	Herpetofaunal Composition	7.15	7.15	Messinian							166	716	Van Dam et al., 2001									166	716
580	El Regajo 3	40.95	-1.2333	40.451	40.451	-1.646	-1.646	Herpetofaunal Composition	7.16	7.16	Messinian							166	716	Van Dam et al., 2001									166	716
581	Masada del Valle 5	40.12	-0.26	39.635	39.635	-0.66	-0.66	Herpetofaunal Composition	7.17	7.17	Messinian							245	795	Van Dam et al., 2001									245	795
582	Cubla	40.2167	-1.0667	39.719	39.719	-1.463	-1.463	Herpetofaunal Composition	7.18	7.18	Messinian							245	795	Van Dam et al., 2001									245	795
583	Tortajada C	40.4	-1.0667	39.896	39.896	-1.472	-1.472	Herpetofaunal Composition	7.26	7.26	Tortonian							245	795	Van Dam et al., 2001									245	795
584	Masada Ruea 4	40.3833	-1.0833	39.862	39.862	-1.502	-1.502	Herpetofaunal Composition	7.5	7.5	Tortonian							245	795	Van Dam et al., 2001									245	795
585	Masada Ruea 3	40.3833	-1.0833	39.859	39.859	-1.504	-1.504	Herpetofaunal Composition	7.54	7.54	Tortonian							312	862	Van Dam et al., 2001									312	862
586	Masada del Valle 2	40.12	-0.26	39.605	39.605	-0.684	-0.684	Herpetofaunal Composition	7.6	7.6	Tortonian							468	1018	Van Dam et al., 2001									468	1018
587	Tortajada B	40.4	-1.0667	39.865	39.865	-1.497	-1.497	Herpetofaunal Composition	7.7	7.7	Tortonian							414	964	Van Dam et al., 2001									414	964
588	Vivero de Pinos	40.33	-1.08	39.773	39.773	-1.525	-1.525	Herpetofaunal Composition	8	8	Tortonian							257	807	Van Dam et al., 2001									257	807
589	Los Aguanaces 3	40.23	-5.5	39.593	39.593	-5.91	-5.91	Herpetofaunal Composition	8.13	8.13	Tortonian							143	693	Van Dam et al., 2001									143	693
590	Los Aguanaces	40.23	-5.5	39.589	39.589	-5.912	-5.912	Herpetofaunal Composition	8.17	8.17	Tortonian							52	602	Van Dam et al., 2001									52	602
591	Los Aguanaces 1	40.23	-5.5	39.589	39.589	-5.912	-5.912	Herpetofaunal Composition	8.17	8.17	Tortonian							168	718	Van Dam et al., 2001									168	718
592	La Gloria 10	40.23	-5.48	39.586	39.586	-5.895	-5.895	Herpetofaunal Composition	8.22	8.22	Tortonian							53	603	Van Dam et al., 2001									53	603
593	Puente Minero 3	40.5	-1	39.917	39.917	-1.473	-1.473	Herpetofaunal Composition	8.39	8.39	Tortonian							449	999	Van Dam et al., 2001									449	999
594	Masada Ruea 2	40.3833	-1.0833	39.795	39.795	-1.555	-1.555	Herpetofaunal Composition	8.44	8.44	Tortonian							882	1432	Van Dam et al., 2001									882	1432
595	Peralejos D	40.29	-1.02	39.673	39.673	-1.513	-1.513	Herpetofaunal Composition	8.85	8.85	Tortonian							1479	2029	Van Dam et al., 2001									1479	2029
596	La Gloria 11	40.23	-5.48	39.525	39.525	-5.933	-5.933	Herpetofaunal Composition	8.97	8.97	Tortonian							1479	2029	Van Dam et al., 2001									1479	2029
597	Los Aguanaces 5B	40.23	-5.5	39.521	39.521	-5.955	-5.955	Herpetofaunal Composition	9.01	9.01	Tortonian							479	1029	Van Dam et al., 2001									479	1029
598	La Roma 2	40.29	-1	39.638	39.638	-1.52	-1.52	Herpetofaunal Composition	9.34	9.34	Tortonian							232	782	Van Dam et al., 2001									232	782
599	La Roma 1	40.29	-1	39.633	39.633	-1.524	-1.524	Herpetofaunal Composition	9.41	9.41	Tortonian							323	873	Van Dam et al., 2001									323	873
600	Puente Minero 10	40.5	-1	39.837	39.837	-1.536	-1.536	Herpetofaunal Composition	9.49	9.49	Tortonian							233	783	Van Dam et al., 2001									233	783
601	Puente Minero 2	40.5	-1	39.829	39.829	-1.542	-1.542	Herpetofaunal Composition	9.6	9.6	Tortonian							233	783	Van Dam et al., 2001									233	783
602	Masia d.l. Roma 11	40.29	-1.02	39.618	39.618	-1.555	-1.555	Herpetofaunal Composition	9.61	9.61	Tortonian							168	718	Van Dam et al., 2001									168	718
603	Puente Minero 8B	40.5	-1	39.825	39.825	-1.545	-1.545	Herpetofaunal Composition	9.66	9.66	Tortonian							233	783	Van Dam et al., 2001									233	783
604	Puente Minero 8A	40.5	-1	39.824	39.824	-1.547	-1.547	Herpetofaunal Composition	9.67	9.67	Tortonian							233	783	Van Dam et al., 2001									233	783
605	Masia d.l. Roma 9	40.29	-1.02	39.611	39.611	-1.562	-1.562	Herpetofaunal Composition	9.72	9.72	Tortonian							233	783	Van Dam et al., 2001									233	783
606	Masia d.l. Roma 7	40.29	-1.02	39.609	39.609	-1.563	-1.563	Herpetofaunal Composition	9.74	9.74	Tortonian							233	783	Van Dam et al., 2001									233	783
607	Masia d.l. Roma 4C	40.29	-1.02	39.603	39.603	-1.569	-1.569	Herpetofaunal Composition	9.85	9.85	Tortonian							233	783	Van Dam et al., 2001									233	783
608	Masia d.l. Roma 4B	40.29	-1.02	39.601	39.601	-1.57	-1.57	Herpetofaunal Composition	9.87	9.87	Tortonian							605	1155	Van Dam et al., 2001									605	1155
609	Masia d.l. Roma 3	40.29	-1.02	39.598	39.598	-1.573	-1.573	Herpetofaunal Composition	9.92	9.92	Tortonian							168	718	Van Dam et al., 2001									168	718
610	Casacante 4	40.2	-1.1	39.491	39.491	-1.662	-1.662	Herpetofaunal Composition	10.17	10.17	Tortonian							312	862	Böhme et al., 2008									312	862
611	Casas Altas	40.3333	-1.2667	39.587	39.587	-1.86	-1.86	Herpetofaunal Composition	10.7	10.7	Tortonian							489	1039	Van Dam et al., 2001									489	1039
612	Nombrevilla 1	41.07	-1.21	40.321	40.321	-1.835	-1.835	Herpetofaunal Composition	10.76	10.76	Tortonian							3	553	Van Dam et al., 2001									3	553
613	Abezames	41.6	-5.8	40.911	40.721	-6.276	-6.411	Co-existence Approach	8.7	11.2	Tortonian	14.1	18.1	5	9.6	24.5	28.5	657.5	1057.5	Bruch et al., 2004	Bruch et al., 2011		14.1	18.1	5	9.6	24.5	28.5	657.5	1057.5
614	Achldorf	48.43	12.36	47.979	47.94	11.253	11.171	Co-existence Approach	11	12	Tortonian	14.4	18.4	4.6	8.6	24.2	28.2	1042.5	1442.5	Bruch, 1998			14.4	18.4	4.6	8.6	24.2	28.2	1042.5	1442.5
615	Agarak	38.9	46.19	39.107	39.181	45.861	45.734	Co-existence Approach	5.3	7.1	Messinian	13.5	24.9	2.5	22.2	22.8	28.1			Bruch and Gabrielyan, 2002			13.5	24.9	2.5	22.2	22.8	28.1
616	Balatonszentgyörgy	46.7	18.45	46.507	46.386	17.738	17.343	Co-existence Approach	11	11.5	Tortonian	10.1	16.6					735	1356	Steppuhn et al., 2007			10.1	16.6					735	1356
617	Barbara	34.88	25	34.456	34.16	24.8	24.663	Co-existence Approach	5.3	9	Messinian	15	19					540.5	940.5	Steppuhn et al., 2007			15	19					540.5	940.5
618	Bou Regreg	33.9	-6.8	33.345	33.248	-6.816	-6.818	Climate Amplitude Method	5.7	6.7	Messinian	15.6	24.7					253	767	Fauquette et al., 2006			15.6	24.7					253	767
619	Can vilella	42.5	2	42.083	42.078	1.558	1.553	Climate Amplitude Method	6.625	6.7	Messinian	15.5	19.8					1070	1300	Fauquette et al., 2006			15.5	19.8					1070	1300
620	Capodarso	37.5	14.2	36.971	36.937	14.025	14.014	Climate Amplitude Method	5.95	6.325	Messinian	15.6	24.7					355	680	Fauquette et al., 2006			15.6	24.7					355	680
621	Carmona	37.3	-5.4	36.831	36.815	-5.649	-5.657	Climate Amplitude Method	6.05	6.25	Messinian	15.6	24.7					355	680	Fauquette et al., 2006			15.6	24.7					355	680
622	Douiet 1	34	-2.5	33.382	33.352	-2.548	-2.551	Climate Amplitude Method	6.39	6.7	Messinian	21.6	24.7					1100	1550	Fauquette et al., 2006			21.6	24.7					1100	1550
623	Site 380A	42.1	29.8	42.103	42.103	29.346	29.309	Climate Amplitude Method	5.7	6.16	Messinian	15.6	19.8					1100	1550	Fauquette et al., 2006			15.6	19.8					1100	1550
624	Lower Jakokkota	-17.257	-69.441	-18.763	-18.783	-66.148	-66.099	Leaf morphology (leaf physiognomy)	10.6	10.72	Tortonian	17.6	22.6					380	740	Gregory-Wodzicki, 2002			17.6	22.6					380	740
625	Fingerrock Nevada	38.1	-118	38.256	38.223	-115.055	-113.184	Nearest living relative	8	13	Tortonian	11.5	15.5							Graham, 1999			11.5	15.5
626	Deleina	44.05	22.633	43.877	43.85	21.758	21.647	Co-existence Approach	10	11.6	Tortonian	13.25	17.25					740	1206	Ivanov et al., 2002			13.25	17.25					740	1206
627	Deleina	44.05	22.633	43.877	43.85	21.758	21.647	Co-existence Approach	10	11.6	Tortonian	13.25	17.25					740	1206	Ivanov et al., 2002			13.25	17.25					740	1206
628	Deleina	44.05	22.633	43.877	43.85	21.758	21.647	Co-existence Approach	10	11.6	Tortonian	13.95	17.95					652	1206	Ivanov et al., 2002			13.95	17.95					652	1206
629	Deleina	44.05	22.633	43.877	43.85	21.758	21.647	Co-existence Approach	10	11.6	Tortonian	13.95	17.95					540	940	Ivanov et al., 2002			13.95	17.95					540	940
630	Deleina	44.05	22.633	43.877	43.85	21.758	21.647	Co-existence Approach	10	11.6	Tortonian	11.6	18.4					505.5	905.5	Ivanov et al., 2002			11.6	18.4					505.5	905.5
638	Drenovets	43.7	22.983	43.606	43.587	22.469	22.373	Co-existence Approach	6	7.1	Messinian	13.95	17.95					992	1392	Ivanov et al., 2002			13.95	17.95					992	1392
639	Drenovets	43.7	22.983	43.587	43.553	22.373	22.205	Co-existence Approach	7.1	9	Messinian	11.6	17.2					740	1308	Ivanov et al., 2002			11.6	17.2					740	1308
640	Drenovets	43.7	22.983	43.606	43.587	22.469	22.373	Co-existence Approach	6	7.1	Messinian	13.4	17.4					1047.5	1447.5	Ivanov et al., 2002			13.4	17.4					1047.5	1447.5
644	Drenovets	43.7	22.983	43.553	43.535	22.205	22.122	Co-existence Approach	9	10	Tortonian	15	19					823	1308	Ivanov et al., 2002			15	19					823	1308
649	Drenovets	43.7	22.983	43.587	43.553	22.373	22.205	Co-existence Approach	7.1	9	Messinian	13.95	17.95					740	1308	Ivanov et al., 2002			13.95	17.95					740	1308
650	Drenovets	43.7	22.983	43.553	43.535	22.205	22.122	Co-existence Approach	9	10	Tortonian	14.4	18.4					1034	1434	Ivanov et al., 2002			14.4	18.4					1034	1434
651	Drenovets	43.7	22.983	43.553	43.535	22.205	22.122	Co-existence Approach	9	10	Tortonian	14.4	18.4					823	1308	Ivanov et al., 2002			14.4	18.4					823	1308
652	Drenovets	43.7	22.983	43.587	43.553	22.373	22.205	Co-existence Approach	7.1	9	Messinian	15.8	19.8					1047.5	1447.5	Ivanov et al., 2002			15.8	19.8					1047.5	1447.5
653	Drenovets	43.7	22.983	43.587	43.553	22.373	22.205	Co-existence Approach	7.1	9	Messinian	13.4	17.4					740	1308	Ivanov et al., 2002			13.4	17.4					740	1308
654	Drenovets	43.7	22.983	43.587	43.553	22.373	22.205	Co-existence Approach	7.1	9	Messinian	13.25	17.25					740	1308	Ivanov et al., 2002			13.25	17.25					740	1308
655	Drenovets	43.7	22.983	43.587	43.553	22.373	22.205	Co-existence Approach	7.1	9	Messinian	13.3	18.4					897	1308	Ivanov et al., 2002			13.3	18.4					897	1308
656	Drenovets	43.7	22.983	43.587	43.553	22.373	22.205	Co-existence Approach	7.1	9	Messinian	13.3	18.4					992	1392	Ivanov et al., 2002			13.3	18.4					992	1392
657	Drenovets	43.7	22.983	43.587	43.553	22.373	22.205	Co-existence Approach	7.1	9	Messinian	13.6	18.4					740	1308	Ivanov et al., 2002			13.6	18.4					740	1308
658	Drenovets	43.7	22.983	43.587	43.553	22.373	22.205	Co-existence Approach	7.1	9	Messinian	11.6	17.2					740	1308	Ivanov et al., 2002			11.6	17.2					740	1308
659	Drenovets	43.7	22.983	43.587	43.553	22.373	22.205	Co-existence Approach	7.1	9	Messinian	13.6	18.4					740	1308	Ivanov et al., 2002			13.6	18.4					740	1308
660	Drenovets	43.7	22.983	43.553	43.535	22.205	22.122	Co-existence Approach	9	10	Tortonian	13.4	17.4					740	1308	Ivanov et al., 2002			13.4	17.4					740	1308
661	Drenovets	43.7	22.983	43.587	43.553	22.373	22.205	Co-existence Approach	7.1	9	Messinian	13.95	17.95					1047.5	1447.5	Ivanov et al., 2002			13.95	17.95					1047.5	1447.5
662	Drenovets	43.7	22.983	43.606	43.587	22.469	22.373	Co-existence Approach	6	7.1	Messinian	13.4	17.4					740	1308	Ivanov et al., 2002			13.4	17.4					740	1308
664	Drenovets	43.7	22.983	43.606	43.587	22.469	22.373	Co-existence Approach	6	7.1	Messinian	13.95	17.95					652	1322	Ivanov et al., 2002			13.95	17.95					652	1322
665	Drenovets	43.7	22.983	43.553	43.535	22.205	22.122	Co-existence Approach	9	10	Tortonian	13.25	17.25					740	1308	Ivanov et al., 2002			13.25	17.25					740	1308
666	Drenovets	43.7	22.983	43.553	43.535	22.205	22.122	Co-existence Approach	9	10	Tortonian	14.1	18.1					1054.5	1454.5	Ivanov et al., 2002			14.1	18.1					1054.5	1454.5
667	Drenovets	43.7	22.983	43.606	43.587	22.469	22.373	Co-existence Approach	6	7.1	Messinian	14.4	18.4					992	1392	Ivanov et al., 2002			14.4	18.4					992	1392
671	Mt. Charay	44.7	4.8	44.285	44.037	4.232	3.924	Relative abundance of arctotertiary and palaeotropic elements in a fossil flora	7.25	11.6	Tortonian	14.5	20.5					500	1000	Mai, 1995			14.5	20.5					500	1000
672	Odessa	46.47	30.73	46.487	46.487	30.002	29.592	Relative abundance of arctotertiary and palaeotropic elements in a fossil flora	7.25	11.6	Tortonian	12.5	18.5					500	1000	Mai, 1995			12.5	18.5					500	1000
673	Rochessauve	44.7	4.8	44.285	44.037	4.232	3.924	Relative abundance of arctotertiary and palaeotropic elements in a fossil flora	7.25	11.6	Tortonian	14.5	20.5					800	1200	Mai, 1995			14.5	20.5					800	1200
674	Sosnica	51	17	50.781	50.644	16.128	15.642	Relative abundance of arctotertiary and palaeotropic elements in a fossil flora	7.25	11.6	Tortonian	12	18							Mai, 1995			12	18
675	Sprendlingen	49.8	8.2	49.437	49.218	7.432	7.01	Relative abundance of arctotertiary and palaeotropic elements in a fossil flora	7.25	11.6	Tortonian	10	16					900	1300	Mai, 1995			10	16					900	1300
676	SE-Australia	-35	148	-37.539	-40.51	147.677	147.394	Leaf morphology (leaf physiognomy)	9.5	13.5	Tortonian	-3	3					1000	1500	Martin, 1990			-3	3					1000	1500
677	Lachlan River valley	-33	145	-35.568	-38.575	144.553	144.102	Leaf morphology (leaf physiognomy)	9.5	13.5	Tortonian	-3	3					1000	1500	Martin, 1998			-3	3					1000	1500
679	Klettwitz	51.55	13.9	51.209	51.134	12.807	12.593	Co-existence Approach	9	11	Tortonian	14	18	3.45	7.45	23.7	27.7	967	1367	Mosbrugger et al., 2005	Bruch et al., 2011		14	18	3.45	7.45	23.7	27.7	967	1367
682	Vösendorf	48.07	16.33	47.763	47.717	15.339	15.21	Co-existence Approach	9.5	11	Tortonian	12.9	16.9	1.5	5.5	24.1	28.1	897	1327	Mosbrugger et al., 2005			12.9	16.9	1.5	5.5	24.1	28.1	897	1327
683	Jidon Basin	45.33	131	46.019	46.884	130.604	130.377	Nearest living relative	9.5	13.5	Tortonian	9	14					700	1100	Shu et al., 2008			9	14					700	1100
685	Daphnedes	34.97	24.5	34.399	34.043	24.236	24.076	Co-existence Approach	9	11.5	Tortonian	15	19					540.5	940.5	Steppuhn et al., 2007			15	19					540.5	940.5
686	Dorheim	50.35	8.57	50.107	49.954	8.025	7.696	Co-existence Approach	5	9	Messinian	13.05	17.05					897	1297	Steppuhn et al., 2007			13.05	17.05					897	1297
687	Ebersbrunn	48.53	15.88	48.267	48.231	15.031	14.923	Co-existence Approach	7.1	11.5	Messinian	12.5	16.6					897	1356	Steppuhn et al., 2007			12.5	16.6					897	1356
688	Gabbro	43.5	10.35	42.842	43.016	10.129	10.186	Co-existence Approach	5.3	9	Messinian	14.6	18.6					876	1548	Steppuhn et al., 2007			14.6	18.6					876	1548
689	Höllgraben	47.25	15.58	46.886	46.86	14.526	14.462	Co-existence Approach	11	11.5	Tortonian	13.85	17.85					735	1167	Steppuhn et al., 2007			13.85	17.85					735	1167
692	Kaiyuan	23.5	103.2	24.01	24.316	103.682	104.001	Co-existence Approach	5.3	11.6	Messinian	12.6	16.6					807	1207	Steppuhn et al., 2007			12.6	16.6					807	1207
693	Kunovice	49.08	17.42	48.76	48.737	16.252	16.18	Co-existence Approach	11	11.5	Tortonian	11.2	21.3					592	1547	Steppuhn et al., 2007			11.2	21.3					592	1547
694	Mistrin	48.97	17.17	48.666	48.644	16.08	16.01	Co-existence Approach	10.6	11	Tortonian	12.1	18.7					867	1356	Steppuhn et al., 2007			12.1	18.7					867	1356
695	Sachalin	50.9	142.17	51.929	52.961	142.156	143.615	Co-existence Approach	5.3	11.6	Messinian	11.55	15.55					829.5	1229.5	Steppuhn et al., 2007			11.55	15.55					829.5	1229.5
696	Sremska	45.1	19.45	44.928	44.816	18.804	18.431	Co-existence Approach	7.1	11.5	Messinian	14	19					867	1384	Steppuhn et al., 2007			14	19					867	1384
697	Stegersbach	47.12	16.22	46.894	46.75	15.517	15.113	Co-existence Approach	9	10.6	Tortonian	15.6	20.8					995.5	1395.5	Steppuhn et al., 2007			15.6	20.8					995.5	1395.5
698	Wien B-C	48.8	16.65	48.485	48.455	15.573	15.486	Co-existence Approach	10.6	11.5	Tortonian	14.4	18.7					649	1049	Steppuhn et al., 2007			14.4	18.7					649	1049
700	Chaplinka	46.37	33.53	46.42	46.434	33.005	32.822	Co-existence Approach	5.3	7.1	Messinian	12.15	16.15	0.9	6.6	21.55	25.55	824	1224	Syabryaj et al., 2007			12.15	16.15	0.9	6.6	21.55	25.55	824	1224
701	Emetovka	46.733	30.533	46.746	46.745	29.811	29.513	Co-existence Approach	7.1	10	Messinian	4.9	17.4	-0.1	10.2	21.7	27	653	1053	Syabryaj et al., 2007			4.9	17.4	-0.1	10.2	21.7	27	653	1053
702	Emetovka	46.733	30.533	46.746	46.745	29.811	29.513	Co-existence Approach	7.1	10	Messinian	5.2	13.8	-5.9	4.1	17.1	24.3	389	900	Syabryaj et al., 2007			5.2	13.8	-5.9	4.1	17.1	24.3	389	900
703	Emetovka	46.733	30.533	46.745	46.744	29.513	29.263	Co-existence Approach	10	13	Tortonian	4.6	14.1	-7.9	5.8	17.7	23.2	735	1167	Syabryaj et al., 2007			4.6	14.1	-7.9	5.8	17.7	23.2	735	1167
710	Frechen	50.89	6.75	50.611	50.302	6.168	5.566	Co-existence Approach	5.3	11	Messinian	12.2	16.2	0.55	4.55	25.7	27.7	1079	1479	Utescher et al., 2000	Bruch et al., 2011		12.2	16.2	0.55	4.55	25.7	27.7	1079	1479
711	Opencast_Garzweiler	51.032	6.52	50.751	50.438	5.935	5.331	Co-existence Approach	5.3	11	Messinian	11.55	15.55	-0.1	4.1	20.9	24.9	897	1297	Utescher et al., 2000			11.55	15.55	-0.1	4.1	20.9	24.9	897	1297
712	Hambach Lignite Mine	50.917	6.417	50.634	50.321	5.836	5.236	Co-existence Approach	5.3	11	Messinian	12.7	16.7	2.9	7.1	23.75	27.75	1044.5	1444.5	Utescher et al., 2000			12.7	16.7	2.9	7.1	23.75	27.75	1044.5	1444.5
713	Hambach Lignite Mine	50.917	6.417	50.634	50.321	5.836	5.236	Co-existence Approach	5.3	11	Messinian	10.5	14.5	-1.3	4.1	22.05	26.05	809	1209	Utescher et al., 2000			10.5	14.5	-1.3	4.1	22.05	26.05	809	1209
714	Hambach Lignite Mine	50.917	6.417	50.634	50.321	5.836	5.236	Co-existence Approach	5.3	11	Messinian	14	18	8.05	12.05	23.3	27.3	1054	1454	Utescher et al., 2000			14	18	8.05	12.05	23.3	27.3	1054	1454
715	Hambach Lignite Mine	50.917	6.417	50.634	50.321	5.836	5.236	Co-existence Approach	5.3	11	Messinian	13.1	17.1	5.25	9.25	23.75	27.75	1044.5	1444.5	Utescher et al., 2000			13.1	17.1	5.25	9.25	23.75	27.75	1044.5	1444.5
716	Hambach Lignite Mine	50.917	6.417	50.634	50.321	5.836	5.236	Co-existence Approach	5.3	11	Messinian	12.9	16.9	0.1	4.1	24.3	28.3	908	1308	Utescher et al., 2000			12.9	16.9	0.1	4.1	24.3	28.3	908	1308
717	Hambach Lignite Mine	50.917	6.417	50.321	50.039	5.236	4.759	Co-existence Approach	11	16.4	Tortonian	13.1	17.1	4.5	13.3	24.7	28.7	1187.5	1587.5	Utescher et al., 2000			13.1	17.1	4.5	13.3	24.7	28.7	1187.5	1587.5
718	Hambach Lignite Mine	50.917	6.417	50.321	50.039	5.236	4.759	Co-existence Approach	11	16.4	Tortonian	13.2	17.2	4.3	8.3	24.7	28.7	1210	1610	Utescher et al., 2000			13.2	17.2	4.3	8.3	24.7	28.7	1210	1610
719	Hambach Lignite Mine	50.917	6.417	50.321	50.039	5.236	4.759	Co-existence Approach	11	16.4	Tortonian	14.85	18.85	8.65	12.65	24.75	28.75	747.5	1147.5	Utescher et al., 2000			14.85	18.85	8.65	12.65	24.75	28.75	747.5	1147.5
720	Zukunft Mine 7A	50.82	6.17	50.535	50.218	5.593	4.998	Co-existence Approach	5.3	11	Messinian	13.4	17.4	5.25	9.25	23.8	27.8	1044.5	1444.5	Utescher et al., 2000			13.4	17.4	5.25	9.25	23.8	27.8	1044.5	1444.5
725	Crveni_Breg_Grocka	44.67	20.72	44.544	44.474	20.184	19.91	Co-existence Approach	6	9	Messinian	12.6	16.6	-0.1	4.1	24.05	28.05	897	1297	Utescher et al., 2007			12.6	16.6	-0.1	4.1	24.05	28.05	897	1297
726	Osojna (Kladovo)	44.58	22.63	44.481	44.425	22.093	21.817	Co-existence Approach	6	9	Messinian	13.2	17.2	1.8	5.8	24.6	28.6	897	1297	Utescher et al., 2007			13.2	17.2	1.8	5.8	24.6	28.6	897	1297
727	Nenana Coalfield	63.9	-148.9	64.528	64.84	-145.444	-143.166	CLAMP (leaf physiognomy)	8	11.3	Tortonian	3	7							White et al., 1997			3	7
728	Cook Inlet	60	-152	60.744	61.046	-148.493	-146.538	CLAMP (leaf physiognomy)	7	7	Messinian	1.45	7.45							Wolfe, 1994a			1.45	7.45
729	Faraday	45.2	-122.2	45.466	45.459	-117.804	-117.395	CLAMP (leaf physiognomy)	11	12	Tortonian	7.5	13.5							Wolfe, 1994b			7.5	13.5
730	Middle Ellensburg	47	-120.5	47.229	47.229	-116.415	-116.415	CLAMP (leaf physiognomy)	10	10	Tortonian	9.3	15.3							Wolfe, 1994b			9.3	15.3
731	Troutdale	45.5394	-122.386	45.815	45.815	-118.383	-118.383	CLAMP (leaf physiognomy)	10	10	Tortonian	8.7	14.7							Wolfe, 1994b			8.7	14.7
732	Weyerhauser	45.1475	-122.576	45.423	45.417	-118.184	-117.776	CLAMP (leaf physiognomy)	11	12	Tortonian	6.8	12.8							Wolfe, 1994b			6.8	12.8
734	Lerch	48.45	12.75	48.065	48.008	11.766	11.638	Co-existence Approach	9.5	11	Tortonian	12.8	16.8	0.6	4.8	23.9	27.9	867	1267	Mosbrugger et al., 2005			12.8	16.8	0.6	4.8	23.9	27.9	867	1267
735	Büyük Menderes Region	36.9	27.15	36.837	36.817	26.557	26.423	Co-existence Approach	10	13	Tortonian	12.9	20.8	1.1	13.3	23.6	28.1	1151.5	1551.5	Akgün et al., 2007			12.9	20.8	1.1	13.3	23.6	28.1	1151.5	1551.5
736	Hrazdan_1	40.23	44.53	40.575	40.666	43.836	43.671	Co-existence Approach	10	13	Tortonian	15.05	19.05							Bruch and Gabrielyan, 2002			15.05	19.05
737	Hrazdan_2	40.24	44.53	40.585	40.676	43.836	43.671	Co-existence Approach	10	13	Tortonian	13.1	17.1					861.5	1261.5	Bruch and Gabrielyan, 2002			13.1	17.1					861.5	1261.5
738	Mangyus	40.2	44.67	40.548	40.64	43.978	43.813	Co-existence Approach	10	13	Tortonian	9.4	18.2					700	1451	Bruch and Gabrielyan, 2002			9.4	18.2					700	1451
739	Mayisyan	40.83	43.86	41.008	41.072	43.485	43.341	Co-existence Approach	5.3	7.1	Messinian	13.3	18.5							Bruch and Gabrielyan, 2002			13.3	18.5
740	Nakhichevan_1	39.33	45.42	39.696	39.792	44.765	44.611	Co-existence Approach	10	13	Tortonian	13.95	17.95					740	1213	Bruch and Gabrielyan, 2002			13.95	17.95					740	1213
741	Burgos	41.6	-3.7	40.947	40.774	-4.198	-4.334	Co-existence Approach	8.7	11.1	Tortonian	14.3	18.3	6.35	10.35	23.5	27.5	1034	1434	Bruch et al., 2004	Bruch et al., 2011		14.3	18.3	6.35	10.35	23.5	27.5	1034	1434
742	Massenhausen	48.4	11.8	48.04	47.955	10.93	10.741	Co-existence Approach	9.7	11.1	Tortonian	11.55	15.55							Bruch et al., 2004			11.55	15.55
743	Povoa	39.2	-8.9	38.461	38.264	-9.276	-9.378	Co-existence Approach	8.7	11.6	Tortonian	13.35	17.35	2.5	8.3	22.85	26.85	735	1333	Bruch et al., 2004	Bruch et al., 2011		13.35	17.35	2.5	8.3	22.85	26.85	735	1333
744	Rudabánya	48.71	20.63	48.598	48.453	20.052	19.391	Co-existence Approach	9.7	11.1	Tortonian	13.65	17.65							Bruch et al., 2004			13.65	17.65
745	Samos	37.75	26.97	37.719	37.671	26.643	26.27	Co-existence Approach	11.2	11.2	Tortonian	15.95	19.95	7.6	11.6	24.95	28.95	820.5	1220.5	Bruch et al., 2004			15.95	19.95	7.6	11.6	24.95	28.95	820.5	1220.5
746	Sé	47.15	16.36	46.913	46.879	15.615	15.514	Co-existence Approach	7.25	11.6	Tortonian	12.1	16.1	-0.1	5.1	21.6	26.7	851	1251	Bruch et al., 2004			12.1	16.1	-0.1	5.1	21.6	26.7	851	1251
747	Sivas Gemerek	37	38	35.897	35.216	37.878	37.849	Co-existence Approach	7.25	11.6	Tortonian	16.2	20.2	4.3	16.6	24.6	28.6	1153.5	1553.5	Bruch et al., 2004			16.2	20.2	4.3	16.6	24.6	28.6	1153.5	1553.5
748	Wörth	47.02	15.75	46.719	46.669	14.863	14.73	Co-existence Approach	7.25	11.6	Tortonian	13.3	17.3	-0.7	7	24.2	28.2	719	1119	Bruch et al., 2004	Bruch et al., 2011		13.3	17.3	-0.7	7	24.2	28.2	719	1119
749	Zukunft Mine 7A	50.82	6.17	50.269	50.187	5.085	4.946	Co-existence Approach	8.5	10.3	Tortonian	13.4	17.4							Bruch et al., 2004			13.4	17.4
750	Felsotarkany	47.067	20.417	46.84	46.774	19.407	19.162	Co-existence Approach	10	13	Tortonian	12.3	16.3					702.5	1102.5	Erdei et al., 2007			12.3	16.3					702.5	1102.5
751	Cholodnaja	48.023	38.066	48.165	48.238	37.289	36.847	Co-existence Approach	7.1	11.5	Messinian	15.55	19.55	3.8	9.6	21.6	28.3	1096	1520	Bruch et al., 2011	Ananova, 1974		15.55	19.55	3.8	9.6	21.6	28.3	1096	1520
752	Ejska	47.33	39.02	47.488	47.572	38.272	37.846	Co-existence Approach	7.1	11.5	Messinian	11.5	17	-0.1	10.3	22.65	26.65	1212	1612	Bruch et al., 2011	Ananova, 1974		11.5	17	-0.1	10.3	22.65	26.65	1212	1612
753	Mataschen	46.1	16	45.464	45.31	15.69	15.616	Nearest living relative	7.25	11.6	Tortonian	15	19	0	3			1280	1950	Kovar-Eder and Hably 2006			15	19	0	3			1280	1950
754	Hammerschmiede	47.9	10.61	47.577	47.381	9.895	9.502	Co-existence Approach	7.25	11.6	Tortonian	15.6	21.7	5	13.6	24.3	28.3	1121	1521	Bruch et al., 2011	Seitner, 1987		15.6	21.7	5	13.6	24.3	28.3	1121	1521
755	Belchatow 1	51.367	19.383	51.188	51.074	18.484	17.981	Co-existence Approach	7.25	11.6	Tortonian	13.25	17.25	3.05	7.05	24.8	28.8	995.5	1395.5	Bruch et al., 2011	Worobiec, 2003		13.25	17.25	3.05	7.05	24.8	28.8	995.5	1395.5
756	Belchatow 2	51.367	19.383	51.188	51.074	18.484	17.981	Co-existence Approach	7.25	11.6	Tortonian	15.7	21.7	5	13.6	24.3	28.3	1157	1557	Bruch et al., 2011	Worobiec, 2003		15.7	21.7	5	13.6	24.3	28.3	1157	1557
757	Hambach Lignite Mine	50.917	6.417	50.634	50.426	5.836	5.427	Co-existence Approach	7.1	11.5	Messinian	13.1	17.1	4.3	8.3	23.75	27.75	1040.5	1440.5	Bruch et al., 2006			13.1	17.1	4.3	8.3	23.75	27.75	1040.5	1440.5
758	Vösendorf	48.07	16.33	47.841	47.699	15.577	15.159	Co-existence Approach	7.1	11.5	Messinian	12.85	16.85	1.95	5.95	24.1	28.1	866	1266	Bruch et al., 2006			12.85	16.85	1.95	5.95	24.1	28.1	866	1266
759	Kirşehir	38.12	34.73	38.236	38.265	34.09	33.942	Co-existence Approach	11	13	Tortonian	17	21	1.1	13.3	23.6	28.1	1180.5	1580.5	Akgün et al., 2007			17	21	1.1	13.3	23.6	28.1	1180.5	1580.5
760	Makrilia	35	25.7	34.389	34.318	25.405	25.371	Co-existence Approach	7.7	8.6	Tortonian	16.5	20.5	9	13			800	1600	Kovar-Eder et al., 2006	Sasche, 1997		16.5	20.5	9	13			800	1600
761	Vegora	40.682	21.709	40.239	40.08	21.482	21.401	CLAMP (leaf physiognomy)	4.9	7.25	Messinian	8.1	14.1	-1	5	17.1	25.1			Kovar-Eder et al., 2006			8.1	14.1	-1	5	17.1	25.1
762	Sofia Basin	42.61	25.49	42.56	42.488	25.059	24.567	Autecology	9.5	13.5	Tortonian	11.5	15.5	1	7	19	27	700	1100	Kovar-Eder et al., 2006			11.5	15.5	1	7	19	27	700	1100
763	Borsec	46.95	25.57	46.892	46.9	24.959	25.032	Unknown	5.3	6	Messinian	13.6	17.6						1361	Kovar-Eder et al., 2006			13.6	17.6						1361
764	Staniantsi Basin	43.05	23.03	42.969	42.949	22.592	22.491	Co-existence Approach	5.3	6.5	Messinian	14.65	18.65	4.35	8.35	23.55	27.55	921	1321	Utescher et al., 2009			14.65	18.65	4.35	8.35	23.55	27.55	921	1321
765	Staniantsi Basin	43.05	23.03	42.969	42.949	22.592	22.491	Co-existence Approach	5.3	6.5	Messinian	14.65	18.65	3.8	9.7	20.2	26.4	1096	1520	Utescher et al., 2009			14.65	18.65	3.8	9.7	20.2	26.4	1096	1520
766	Staniantsi Basin	43.05	23.03	42.969	42.949	22.592	22.491	Co-existence Approach	5.3	6.5	Messinian	14.55	18.55	4.35	8.35	24.15	28.15	784.5	1184.5	Utescher et al., 2009			14.55	18.55	4.35	8.35	24.15	28.15	784.5	1184.5
767	Staniantsi Basin	43.05	23.03	42.969	42.949	22.592	22.491	Co-existence Approach	5.3	6.5	Messinian	13.3	17.6	0.9	9.7	23	27	471	1520	Utescher et al., 2009			13.3	17.6	0.9	9.7	23	27	471	1520
768	Staniantsi Basin	43.05	23.03	42.969	42.949	22.592	22.491	Co-existence Approach	5.3	6.5	Messinian	11.6	16.2	-0.3	7.5	20.2	26.4	581	1520	Utescher et al., 2009			11.6	16.2	-0.3	7.5	20.2	26.4	581	1520
769	Staniantsi Basin	43.05	23.03	42.969	42.949	22.592	22.491	Co-existence Approach	5.3	6.5	Messinian	12.9	17.6	0.9	9.7	23.6	27.9	471	1520	Utescher et al., 2009			12.9	17.6	0.9	9.7	23.6	27.9	471	1520
770	Staniantsi Basin	43.05	23.03	42.969	42.949	22.592	22.491	Co-existence Approach	5.3	6.5	Messinian	15	19	5	12.5	24.4	28.4	823	1520	Utescher et al., 2009			15	19	5	12.5	24.4	28.4	823	1520
771	Staniantsi Basin	43.05	23.03	42.969	42.949	22.592	22.491	Co-existence Approach	5.3	6.5	Messinian	11.6	17.6	-0.1	9.7	21.7	27.9	471	1520	Utescher et al., 2009			11.6	17.6	-0.1	9.7	21.7	27.9	471	1520
772	Staniantsi Basin	43.05	23.03	42.969	42.949	22.592	22.491	Co-existence Approach	5.3	6.5	Messinian	11.8	17.6	-0.1	9.7	21.7	27.6	581	1520	Utescher et al., 2009			11.8	17.6	-0.1	9.7	21.7	27.6	581	1520
773	Staniantsi Basin	43.05	23.03	42.969	42.949	22.592	22.491	Co-existence Approach	5.3	6.5	Messinian	11.6	18.4	-0.3	12.5	21.7	28.1	453	1520	Utescher et al., 2009			11.6	18.4	-0.3	12.5	21.7	28.1	453	1520
774	Staniantsi Basin	43.05	23.03	42.969	42.949	22.592	22.491	Co-existence Approach	5.3	6.5	Messinian	11.6	17.5	-0.1	7.7	21.7	27.9	451	1146	Utescher et al., 2009			11.6	17.5	-0.1	7.7	21.7	27.9	451	1146
775	Staniantsi Basin	43.05	23.03	42.969	42.949	22.592	22.491	Co-existence Approach	5.3	6.5	Messinian	11.6	17.5	-0.3	7.7	21.7	26.4	471	1146	Utescher et al., 2009			11.6	17.5	-0.3	7.7	21.7	26.4	471	1146
776	Staniantsi Basin	43.05	23.03	42.969	42.949	22.592	22.491	Co-existence Approach	5.3	6.5	Messinian	11.6	17.6	-0.3	9.7	21.7	26.4	473	1520	Utescher et al., 2009			11.6	17.6	-0.3	9.7	21.7	26.4	473	1520
777	Staniantsi Basin	43.05	23.03	42.969	42.949	22.592	22.491	Co-existence Approach	5.3	6.5	Messinian	14.65	18.65	3.8	9.7	21.7	27.9	1096	1520	Utescher et al., 2009			14.65	18.65	3.8	9.7	21.7	27.9	1096	1520
778	Staniantsi Basin	43.05	23.03	42.969	42.949	22.592	22.491	Co-existence Approach	5.3	6.5	Messinian	12.9	18.4	0.9	9.6	23.6	28.5	473	1520	Utescher et al., 2009			12.9	18.4	0.9	9.6	23.6	28.5	473	1520
779	Staniantsi Basin	43.05	23.03	42.969	42.949	22.592	22.491	Co-existence Approach	5.3	6.5	Messinian	11.6	18.3	-0.3	10.9	21.7	27.6	422	1520	Utescher et al., 2009			11.6	18.3	-0.3	10.9	21.7	27.6	422	1520
780	Staniantsi Basin	43.05	23.03	42.969	42.949	22.592	22.491	Co-existence Approach	5.3	6.5	Messinian	14.6	18.6	5	9.7	23.55	27.55	823	1520	Utescher et al., 2009			14.6	18.6	5	9.7	23.55	27.55	823	1520
781	Staniantsi Basin	43.05	23.03	42.969	42.949	22.592	22.491	Co-existence Approach	5.3	6.5	Messinian	14.55	18.55	4.35	8.35	23.55	27.55	823	1520	Utescher et al., 2009			14.55	18.55	4.35	8.35	23.55	27.55	823	1520
782	Staniantsi Basin	43.05	23.03	42.969	42.949	22.592	22.491	Co-existence Approach	5.3	6.5	Messinian	14.65	18.65	3.8	9.7	21.7	26.4	1096	1520	Utescher et al., 2009			14.65	18.65	3.8	9.7	21.7	26.4	1096	1520
783	Staniantsi Basin	43.05	23.03	42.969	42.949	22.592	22.491	Co-existence Approach	5.3	6.5	Messinian	14.65	18.65	3.8	9.7	23	27	1096	1520	Utescher et al., 2009			14.65	18.65	3.8	9.7	23	27	1096	1520
784	Staniantsi Basin	43.05	23.03	42.969	42.949	22.592	22.491	Co-existence Approach	5.3	6.5	Messinian	14.65	18.65	3.8	9.7	23	27	1096	1520	Utescher et al., 2009			14.65	18.65	3.8	9.7	23	27	1096	1520
785	Staniantsi Basin	43.05	23.03	42.969	42.949	22.592	22.491	Co-existence Approach	5.3	6.5	Messinian	12.9	17.5	0.9	7.7	23	27	471	1146	Utescher et al., 2009			12.9	17.5	0.9	7.7	23	27	471	1146
786	Staniantsi Basin	43.05	23.03	42.969	42.949	22.592	22.491	Co-existence Approach	5.3	6.5	Messinian	15.05	19.05	3.8	12.5	23.6	28.5	1096	1520	Utescher et al., 2009			15.05	19.05	3.8	12.5	23.6	28.5	1096	1520
787	Staniantsi Basin	43.05	23.03	42.969	42.949	22.592	22.491	Co-existence Approach	5.3	6.5	Messinian	15	19	5	12.5	24.4	28.4	823	1520	Utescher et al., 2009			15	19	5	12.5	24.4	28.4	823	1520
788	Staniantsi Basin	43.05	23.03	42.969	42.949	22.592	22.491	Co-existence Approach	5.3	6.5	Messinian	15	19	5	12.5	24.6	28.6	823	1520	Utescher et al., 2009			15	19	5	12.5	24.6	28.6	823	1520
789	Staniantsi Basin	43.05	23.03	42.969	42.949	22.592	22.491	Co-existence Approach	5.3	6.5	Messinian	15	19	5	12.5	24.6	28.6	823	1520	Utescher et al., 2009			15	19	5	12.5	24.6	28.6	823	1520
790	Staniantsi Basin	43.05	23.03	42.969	42.949	22.592	22.491	Co-existence Approach	5.3	6.5	Messinian	12.9	18.3	0.9	9.7	23	27	471	1520	Utescher et al., 2009			12.9	18.3	0.9	9.7	23	27	471	1520
791	Staniantsi Basin	43.05	23.03	42.969	42.949	22.592	22.491	Co-existence Approach	5.3	6.5	Messinian	14.95	18.95	5	9.6	24.15	28.15	823	1520	Utescher et al., 2009			14.95	18.95	5	9.6	24.15	28.15	823	1520
792	Staniantsi Basin	43.05	23.03	42.969	42.949	22.592	22.491	Co-existence Approach	5.3	6.5	Messinian	14.6	18.6	5	9.6	23.55	27.55	1096	1520	Utescher et al., 2009			14.6	18.6	5	9.6	23.55	27.55	1096	1520
793	Staniantsi Basin	43.05	23.03	42.969	42.949	22.592	22.491	Co-existence Approach	5.3	6.5	Messinian	11.6	17.6	-0.1	9.7	22.6	26.6	619	1520	Utescher et al., 2009			11.6	17.6	-0.1	9.7	22.6	26.6	619	1520
794	Staniantsi Basin	43.05	23.03	42.969	42.949	22.592	22.491	Co-existence Approach	5.3	6.5	Messinian	14.6	18.6	5	9.7	23.55	27.55	823	1520	Utescher et al., 2009			14.6	18.6	5	9.7	23.55	27.55	823	1520
795	Staniantsi Basin	43.05	23.03	42.969	42.949	22.592	22.491	Co-existence Approach	5.3	6.5	Messinian	11.6	17.6	-0.3	9.7	19.6	26.4	471	1520	Utescher et al., 2009			11.6	17.6	-0.3	9.7	19.6	26.4	471	1520
796	Staniantsi Basin	43.05	23.03	42.969	42.949	22.592	22.491	Co-existence Approach	5.3	6.5	Messinian	15	19	5	12.5	24.4	28.4	823	1520	Utescher et al., 2009			15	19	5	12.5	24.4	28.4	823	1520
797	Staniantsi Basin	43.05	23.03	42.969	42.949	22.592	22.491	Co-existence Approach	5.3	6.5	Messinian	12.9	17.6	0.9	9.7	23	27	471	1520	Utescher et al., 2009			12.9	17.6	0.9	9.7	23	27	471	1520
798	Staniantsi Basin	43.05	23.03	42.969	42.949	22.592	22.491	Co-existence Approach	5.3	6.5	Messinian	11.6	18.4	-0.3	12.5	21.7	28.1	578	1577	Utescher et al., 2009			11.6	18.4	-0.3	12.5	21.7	28.1	578	1577
799	Staniantsi Basin	43.05	23.03	42.969	42.949	22.592	22.491	Co-existence Approach	5.3	6.5	Messinian	11.6	17.6	-0.3	9.7	21.7	26.4	471	1520	Utescher et al., 2009			11.6	17.6	-0.3	9.7	21.7	26.4	471	1520
800	Staniantsi Basin	43.05	23.03	42.969	42.949	22.592	22.491	Co-existence Approach	5.3	6.5	Messinian	10.6	19.4	-2.7	9.6	21.7	29.3	396	1520	Utescher et al., 2009			10.6	19.4	-2.7	9.6	21.7	29.3	396	1520
801	Staniantsi Basin	43.05	23.03	42.969	42.949	22.592	22.491	Co-existence Approach	5.3	6.5	Messinian	10.6	17.6	-0.3	9.6	21.7	28.3	471	1520	Utescher et al., 2009			10.6	17.6	-0.3	9.6	21.7	28.3	471	1520
802	Staniantsi Basin	43.05	23.03	42.969	42.949	22.592	22.491	Co-existence Approach	5.3	6.5	Messinian	11.6	17.6	-0.1	9.7	21.7	26.4	471	1520	Utescher et al., 2009			11.6	17.6	-0.1	9.7	21.7	26.4	471	1520
803	Staniantsi Basin	43.05	23.03	42.969	42.949	22.592	22.491	Co-existence Approach	5.3	6.5	Messinian	13.3	17.6	-0.1	9.7	22.6	26.6	471	1520	Utescher et al., 2009			13.3	17.6	-0.1	9.7	22.6	26.6	471	1520
804	Staniantsi Basin	43.05	23.03	42.969	42.949	22.592	22.491	Co-existence Approach	5.3	6.5	Messinian	11.6	18.4	-0.3	12.5	21.7	27.9	422	1520	Utescher et al., 2009			11.6	18.4	-0.3	12.5	21.7	27.9	422	1520
805	Staniantsi Basin	43.05	23.03	42.969	42.949	22.592	22.491	Co-existence Approach	5.3	6.5	Messinian	11.6	18.4	1.7	9.6	22.6	26.6	652	1520	Utescher et al., 2009			11.6	18.4	1.7	9.6	22.6	26.6	652	1520
806	Staniantsi Basin	43.05	23.03	42.969	42.949	22.592	22.491	Co-existence Approach	5.3	6.5	Messinian	11.6	18.4	-0.3	9.6	21.7	27.9	453	1520	Utescher et al., 2009			11.6	18.4	-0.3	9.6	21.7	27.9	453	1520
807	Staniantsi Basin	43.05	23.03	42.969	42.949	22.592	22.491	Co-existence Approach	5.3	6.5	Messinian	12.9	17.6	0.9	9.7	23.6	27.6	578	1520	Utescher et al., 2009			12.9	17.6	0.9	9.7	23.6	27.6	578	1520
808	Staniantsi Basin	43.05	23.03	42.969	42.949	22.592	22.491	Co-existence Approach	5.3	6.5	Messinian	14.95	18.95	5	9.7	23.55	27.55	1153.5	1553.5	Utescher et al., 2009			14.95	18.95	5	9.7	23.55	27.55	1153.5	1553.5
809	Staniantsi Basin	43.05	23.03	42.969	42.949	22.592	22.491	Co-existence Approach	5.3	6.5	Messinian	11.6	17.6	-0.1	9.7	21.7	26.4	581	1520	Utescher et al., 2009			11.6	17.6	-0.1	9.7	21.7	26.4	581	1520
810	Staniantsi Basin	43.05	23.03	42.969	42.949	22.592	22.491	Co-existence Approach	5.3	6.5	Messinian	14.65	18.65	5	9.7	23.55	27.55	1096	1520	Utescher et al., 2009			14.65	18.65	5	9.7	23.55	27.55	1096	1520
811	Staniantsi Basin	43.05	23.03	42.969	42.949	22.592	22.491	Co-existence Approach	5.3	6.5	Messinian	11.6	18.4	-0.3	12.5	21.7	28.1	422	1520	Utescher et al., 2009			11.6	18.4	-0.3	12.5	21.7	28.1	422	1520
812	Staniantsi Basin	43.05	23.03	42.969	42.949	22.592	22.491	Co-existence Approach	5.3	6.5	Messinian	13.6	18.3	1.8	10.9	23.6	27.6	505	1520	Utescher et al., 2009			13.6	18.3	1.8	10.9	23.6	27.6	505	1520
813	Staniantsi Basin	43.05	23.03	42.969	42.949	22.592	22.491	Co-existence Approach	5.3	6.5	Messinian	14.6	18.6	5	9.7	23.55	27.55	823	1520	Utescher et al., 2009			14.6	18.6	5	9.7	23.55	27.55	823	1520
814	Staniantsi Basin	43.05	23.03	42.969	42.949	22.592	22.491	Co-existence Approach	5.3	6.5	Messinian	14.6	18.6	5	9.7	24.6	28.6	823	1548	Utescher et al., 2009			14.6	18.6	5	9.7	24.6	28.6	823	1548
815	Staniantsi Basin	43.05	23.03	42.969	42.949	22.592	22.491	Co-existence Approach	5.3	6.5	Messinian	14.65	18.65	3.8	9.7	21.7	26.4	1096	1520	Utescher et al., 2009			14.65	18.65	3.8	9.7	21.7	26.4	1096	1520
816	Staniantsi Basin	43.05	23.03	42.969	42.949	22.592	22.491	Co-existence Approach	5.3	6.5	Messinian	11.6	18.4	-0.3	12.5	19.3	29.4	373	1520	Utescher et al., 2009			11.6	18.4	-0.3	12.5	19.3	29.4	373	1520
817	Staniantsi Basin	43.05	23.03	42.969	42.949	22.592	22.491	Co-existence Approach	5.3	6.5	Messinian	11.6	18.4	-0.3	12.5	21.7	28.5	422	1577	Utescher et al., 2009			11.6	18.4	-0.3	12.5	21.7	28.5	422	1577
818	Staniantsi Basin	43.05	23.03	42.969	42.949	22.592	22.491	Co-existence Approach	5.3	6.5	Messinian	14.65	18.65	3.8	9.7	21.7	26.4	1096	1548	Utescher et al., 2009			14.65	18.65	3.8	9.7	21.7	26.4	1096	1548
819	Staniantsi Basin	43.05	23.03	42.969	42.949	22.592	22.491	Co-existence Approach	5.3	6.5	Messinian	11.6	18.4	-0.1	12.5	21.7	28.8	373	1520	Utescher et al., 2009			11.6	18.4	-0.1	12.5	21.7	28.8	373	1520
820	Staniantsi Basin	43.05	23.03	42.969	42.949	22.592	22.491	Co-existence Approach	5.3	6.5	Messinian	14.65	18.65	3.8	9.6	21.7	26.4	1096	1520	Utescher et al., 2009			14.65	18.65	3.8	9.6	21.7	26.4	1096	1520
821	Staniantsi Basin	43.05	23.03	42.969	42.949	22.592	22.491	Co-existence Approach	5.3	6.5	Messinian	14.65	18.65	3.8	9.6	21.7	26.4	1096	1520	Utescher et al., 2009			14.65	18.65	3.8	9.6	21.7	26.4	1096	1520
822	Staniantsi Basin	43.05	23.03	42.969	42.949	22.592	22.491	Co-existence Approach	5.3	6.5	Messinian	11.6	18.4	-0.3	12.5	19.4	28.5	422	1520	Utescher et al., 2009			11.6	18.4	-0.3	12.5	19.4	28.5	422	1520
823	Staniantsi Basin	43.05	23.03	42.969	42.949	22.592	22.491	Co-existence Approach	5.3	6.5	Messinian	11.6	18.4	-0.3	12.5	21.7	28.7	373	1577	Utescher et al., 2009			11.6	18.4	-0.3	12.5	21.7	28.7	373	1577
824	Staniantsi Basin	43.05	23.03	42.969	42.949	22.592	22.491	Co-existence Approach	5.3	6.5	Messinian	7.6	20.8	-6.5	13.3	21.7	28.1	373	1724	Utescher et al., 2009			7.6	20.8	-6.5	13.3	21.7	28.1	373	1724
825	Wulong a	29.43	89	27.935	26.23	88.863	88.569	Co-existence Approach	9.5	13.5	Tortonian	12.7	16.7	1.7	7.8	22.2	26.2	705	1206	Yao et al., 2011			12.7	16.7	1.7	7.8	22.2	26.2	705	1206
826	Wulong b	29.43	89	27.935	26.23	88.863	88.569	Co-existence Approach	9.5	13.5	Tortonian	13.9	17.9	3.8	7.8	22.2	26.2	951	1351	Yao et al., 2011			13.9	17.9	3.8	7.8	22.2	26.2	951	1351
827	Wulong c	29.43	89	27.935	26.23	88.863	88.569	Co-existence Approach	9.5	13.5	Tortonian	13.3	20.8	1.7	13.3	22.8	28.1	705	1520	Yao et al., 2011			13.3	20.8	1.7	13.3	22.8	28.1	705	1520
828	Lawula 1	29	98	27.918	26.686	97.563	97.06	Co-existence Approach	9.5	13.5	Tortonian	11.2	19	-1.6	12.5	24	28.3	879	1355	Yao et al., 2011			11.2	19	-1.6	12.5	24	28.3	879	1355
829	Lawula a	29	98	27.918	26.686	97.563	97.06	Co-existence Approach	9.5	13.5	Tortonian	12.7	16.7	1.7	7.8	22.2	26.2	705	1206	Yao et al., 2011			12.7	16.7	1.7	7.8	22.2	26.2	705	1206
830	Basin Dingqing 2	32.3	90	31.282	30.121	89.683	89.311	Co-existence Approach	9.5	13.5	Tortonian	15.7	21.3	3.8	13.3	21.7	28.1	1096	1520	Yao et al., 2011			15.7	21.3	3.8	13.3	21.7	28.1	1096	1520
831	Xiaolongtan 1	23.48	103.11	23.854	24.295	103.47	103.92	Co-existence Approach	9.5	13.5	Tortonian	18.7	22.7	5.6	14.8	25.65	29.65	789.5	1189.5	Yao et al., 2011			18.7	22.7	5.6	14.8	25.65	29.65	789.5	1189.5
832	Lühe 1	25.1	101.22	25.407	25.765	101.508	101.875	Co-existence Approach	9.5	13.5	Tortonian	13.3	21.9	-0.1	15.6	22.8	28.1	529	1682	Yao et al., 2011			13.3	21.9	-0.1	15.6	22.8	28.1	529	1682
833	Lühe 2	25.1	101.22	25.407	25.765	101.508	101.875	Co-existence Approach	9.5	13.5	Tortonian	13.3	17.5	-0.1	7.7	23	27.9	619	1146	Yao et al., 2011			13.3	17.5	-0.1	7.7	23	27.9	619	1146
834	Lühe 5	25.1	101.22	25.407	25.765	101.508	101.875	Co-existence Approach	9.5	13.5	Tortonian	9.1	21.7	-2.7	15.6	19.3	28.1	581	1520	Yao et al., 2011			9.1	21.7	-2.7	15.6	19.3	28.1	581	1520
835	Lühe 10	25.1	101.22	25.407	25.765	101.508	101.875	Co-existence Approach	9.5	13.5	Tortonian	11.5	21.7	-1	15.6	23	28.3	619	1682	Yao et al., 2011			11.5	21.7	-1	15.6	23	28.3	619	1682
836	Lühe 16	25.1	101.22	25.407	25.765	101.508	101.875	Co-existence Approach	9.5	13.5	Tortonian	11.5	21.7	-1	15.6	23	28.1	619	1682	Yao et al., 2011			11.5	21.7	-1	15.6	23	28.1	619	1682
837	Lühe 18	25.1	101.22	25.407	25.765	101.508	101.875	Co-existence Approach	9.5	13.5	Tortonian	11.6	18.4	-0.3	12.5	23	27.9	619	1520	Yao et al., 2011			11.6	18.4	-0.3	12.5	23	27.9	619	1520
838	Lühe 22	25.1	101.22	25.407	25.765	101.508	101.875	Co-existence Approach	9.5	13.5	Tortonian	13.3	21.7	-0.1	15.6	22.8	28.1	529	1682	Yao et al., 2011			13.3	21.7	-0.1	15.6	22.8	28.1	529	1682
839	Lühe 23	25.1	101.22	25.407	25.765	101.508	101.875	Co-existence Approach	9.5	13.5	Tortonian	11.5	21.7	-1	15.6	23	28.3	619	1682	Yao et al., 2011			11.5	21.7	-1	15.6	23	28.3	619	1682
840	Fushan 3	19.5	109.56	20.1	20.815	110.097	110.746	Co-existence Approach	9.5	13.5	Tortonian	15.6	21.3	9.45	13.45	24.4	28.4	823	1613	Yao et al., 2011			15.6	21.3	9.45	13.45	24.4	28.4	823	1613
841	Leizhou 3	21.45	110	22.064	22.791	110.463	111.023	Co-existence Approach	9.5	13.5	Tortonian	15.6	21.3	6.6	14.8	24.4	28.4	1035	1520	Yao et al., 2011			15.6	21.3	6.6	14.8	24.4	28.4	1035	1520
842	Beibuwan 3	20.3	108.3	20.856	21.518	108.802	109.412	Co-existence Approach	9.5	13.5	Tortonian	15.6	21.3	9.6	14.8	26.1	30.1	1180	1580	Yao et al., 2011			15.6	21.3	9.6	14.8	26.1	30.1	1180	1580
843	Yinggehai 3	18.31	108.42	18.592	18.938	109.266	110.297	Co-existence Approach	9.5	13.5	Tortonian	14.6	18.6	1.7	14.8	26.1	30.1	1172.5	1572.5	Yao et al., 2011			14.6	18.6	1.7	14.8	26.1	30.1	1172.5	1572.5
844	Zhujiangkou 3	22.25	113.45	22.979	23.842	113.895	114.43	Co-existence Approach	9.5	13.5	Tortonian	20	24	12.55	16.55	26.1	30.1	1183	1613	Yao et al., 2011			20	24	12.55	16.55	26.1	30.1	1183	1613
846	Kuqa	41.83	82.94	42.055	42.119	82.555	82.441	Co-existence Approach	5.3	15.97	Messinian	15.05	19.05	3.8	12.5	23.6	28.1	652	1355	Liu et al., 2011			15.05	19.05	3.8	12.5	23.6	28.1	652	1355
847	Huanghua	41.11	116.68	41.601	42.201	116.278	115.956	Co-existence Approach	9.5	13.5	Tortonian	13.9	17.9	4.05	8.05	22.8	26.8	968.5	1368.5	Liu et al., 2011			13.9	17.9	4.05	8.05	22.8	26.8	968.5	1368.5
848	Bohai Gulf Basin	38.85	119.38	39.625	40.544	118.758	118.3	Co-existence Approach	9.5	13.5	Tortonian	9.1	16.1	-2.7	7.8	19.3	25.6	735	1206	Liu et al., 2011			9.1	16.1	-2.7	7.8	19.3	25.6	735	1206
849	Bozhong Basin	37.04	117.29	37.828	38.752	116.628	116.135	Co-existence Approach	9.5	13.5	Tortonian	11.6	18.4	-0.3	12.5	23	28.2	735	1520	Liu et al., 2011			11.6	18.4	-0.3	12.5	23	28.2	735	1520
850	Huanan	46.12	130.66	46.811	47.679	130.274	130.052	Co-existence Approach	9.5	13.5	Tortonian	13.05	17.05	-0.5	7.1	23.15	27.15	735	1206	Liu et al., 2011			13.05	17.05	-0.5	7.1	23.15	27.15	735	1206
851	Dunhuang	40	94.78	40.351	40.747	94.584	94.358	Co-existence Approach	9.5	13.5	Tortonian	12.3	16.3	0.7	7.8	23.25	27.25	622	1206	Liu et al., 2011			12.3	16.3	0.7	7.8	23.25	27.25	622	1206
852	Southern Junggar	44.52	85.86	45.119	45.814	85.694	85.49	Co-existence Approach	9.5	13.5	Tortonian	15.05	19.05	3.8	12.5	21.7	28.1	1025.5	1425.5	Liu et al., 2011			15.05	19.05	3.8	12.5	21.7	28.1	1025.5	1425.5
853	Kuqa	41.83	82.94	42	42.181	82.65	82.322	Co-existence Approach	9.5	13.5	Tortonian	11.6	18.4	-0.1	12.5	19.4	28.1	554.5	954.5	Liu et al., 2011			11.6	18.4	-0.1	12.5	19.4	28.1	554.5	954.5
854	Xining-Minhe Basin	36.54	102.31	36.821	37.203	101.942	101.643	Co-existence Approach	9.5	13.5	Tortonian	9.4	21.7	-0.1	15.6	18.8	28.1	581	1741	Liu et al., 2011			9.4	21.7	-0.1	15.6	18.8	28.1	581	1741
855	Dubona	44.31	20.45	44.155	44.109	19.826	19.656	Co-existence Approach	7.1	9	Messinian	12.9	16.9	2.25	6.25	24.05	28.05	979.5	1379.5	Utescher et al., 2007			12.9	16.9	2.25	6.25	24.05	28.05	979.5	1379.5
856	Andalucía A1	36.6	-2.88	35.867	35.599	-3.298	-3.457	Climate Amplitude Method	10	10	Tortonian	17	25					355	875	Jiménez-Moreno et al., 2010			17	25					355	875
857	Zaratán	41.62	-4.87	40.875	40.704	-5.407	-5.538	Climate Amplitude Method	10	10	Tortonian	16	25					600	700	Jiménez-Moreno et al., 2010			16	25					600	700
858	Sanabastre and Sampsor	42.41	1.13	41.781	41.733	0.5	0.448	Climate Amplitude Method	10	10	Tortonian	15.5	19.8					1100	1600	Jiménez-Moreno et al., 2010			15.5	19.8					1100	1600
859	Hennersdorf	48.31	15.96	47.97	47.97	14.888	14.888	Climate Amplitude Method	10.2	10.5	Tortonian	15.7	20					1100	1500	Jiménez-Moreno et al., 2008			15.7	20					1100	1500
860	Xiolongtan coalmine	23.813	103.198	24.464	24.634	103.787	103.978	CLAMP (leaf physiognomy)	9	11.6	Tortonian	15.1	21.1	7.8	13.8	21.9	29.9	1629	2301	Xia et al., 2009			15.1	21.1	7.8	13.8	21.9	29.9	1629	2301
861	Xiolongtan coalmine	23.813	103.198	24.464	24.634	103.787	103.978	Co-existence Approach	9	11.6	Tortonian	15.95	19.95	6.2	10.2	23.7	27.7	1215	1639	Xia et al., 2009			15.95	19.95	6.2	10.2	23.7	27.7	1215	1639
862	Kimble Homestead	44.5	-119.633	44.669	44.671	-116.826	-116.786	Palaeosol Analysis	7.1	7.2	Messinian							214	604	Retallack et al., 2002									214	604
863	Logan	39.11	-100.84	39.006	38.982	-98.983	-98.612	Nearest living relative	5	6	Messinian							325	725	Axelrod, 1979									325	725
864	Clarendon	34.64	-100.88	34.393	34.282	-97.34	-96.631	Nearest living relative	10	12	Tortonian							475	875	Axelrod, 1979									475	875
865	Beaver	36.52	-100.59	36.265	36.153	-96.982	-96.261	Nearest living relative	10	12	Tortonian							550	950	Axelrod, 1979									550	950
866	Götzendorf	48	16.58	47.692	47.648	15.57	15.445	Rodent species composition	9.7	11.1	Tortonian	11	17.3							Montiure et al., 2006			11	17.3
867	Castalnou 1B	42.17	3.01	41.572	41.491	2.362	2.266	Rodent species composition	9.7	11.1	Tortonian	11	17.3							Montiure et al., 2006			11	17.3
868	Lo Fournas 5	43	3	42.402	42.317	2.322	2.244	Rodent species composition	9.7	11.1	Tortonian	11	17.3							Montiure et al., 2006			11	17.3
869	Jujurieux	46.04	5.41	45.491	45.413	4.585	4.487	Rodent species composition	9.7	11.1	Tortonian	11	17.3							Montiure et al., 2006			11	17.3
870	Hammerschmiede	47.9	10.61	47.461	47.398	9.65	9.533	Rodent species composition	9.7	11.1	Tortonian	11	17.3							Montiure et al., 2006			11	17.3
871	Petersbuch 14	48.9779	11.1909	48.551	48.489	10.173	10.048	Rodent species composition	9.7	11.1	Tortonian	11	17.3							Montiure et al., 2006			11	17.3
872	Rudabanya	48.38	20.62	48.163	48.131	19.568	19.437	Rodent species composition	9.7	11.1	Tortonian	11	17.3							Montiure et al., 2006			11	17.3
873	Nombrevilla	41.07	-1.21	40.388	40.293	-1.776	-1.86	Rodent species composition	9.7	11.1	Tortonian	13	19.3							Montiure et al., 2006			13	19.3
874	Hostalets de Pierola	41.53	1.77	40.907	40.822	1.158	1.067	Rodent species composition	9.7	11.1	Tortonian	13	19.3							Montiure et al., 2006			13	19.3
875	Ambérieu 1	45.96	5.35	45.468	45.409	4.614	4.529	Rodent species composition	8.7	9.7	Tortonian	8.9	18.6							Montiure et al., 2006			8.9	18.6
876	Lo Fournas 6	43	3	42.466	42.402	2.393	2.322	Rodent species composition	8.7	9.7	Tortonian	8.9	18.6							Montiure et al., 2006			8.9	18.6
877	Lo Fournas 7	43	3	42.466	42.402	2.393	2.322	Rodent species composition	8.7	9.7	Tortonian	13	19.3							Montiure et al., 2006			13	19.3
878	Eichkogel	48.1	16.2	47.843	47.819	15.367	15.293	Rodent species composition	7.75	8.7	Tortonian	11	17.3							Montiure et al., 2006			11	17.3
879	Ambérieu 3	45.96	5.35	45.51	45.468	4.674	4.614	Rodent species composition	7.75	8.7	Tortonian	7.8	17.4							Montiure et al., 2006			7.8	17.4
880	Lobrieu	44.5	5.3	44.049	44.008	4.675	4.62	Rodent species composition	7.75	8.7	Tortonian	10.1	19.7							Montiure et al., 2006			10.1	19.7
881	Dorn–Dürkheim	49.7686	8.2697	49.368	49.331	7.423	7.348	Rodent species composition	7.75	8.7	Tortonian	13	19.3							Montiure et al., 2006			13	19.3
882	Crevillente 2	38.4	-0.5	37.853	37.804	-0.898	-0.933	Rodent species composition	7.75	8.7	Tortonian	10.1	19.7							Montiure et al., 2006			10.1	19.7
883	Alfambra	40.6	-0.9	40.046	39.996	-1.354	-1.395	Rodent species composition	7.75	8.7	Tortonian	7.8	17.4							Montiure et al., 2006			7.8	17.4
884	Castelnou 1	42.17	3.01	41.769	41.681	2.572	2.478	Rodent species composition	7.25	7.75	Tortonian	11.2	20.9							Montiure et al., 2006			11.2	20.9
885	Aljezares de Teruel	40.3	-1.1	39.843	39.743	-1.466	-1.544	Rodent species composition	7.25	7.75	Tortonian	8.9	18.6							Montiure et al., 2006			8.9	18.6
886	Lissieu	45.87	4.75	45.592	45.493	4.343	4.2	Rodent species composition	4.9	7.25	Messinian	8.9	18.6							Montiure et al., 2006			8.9	18.6
887	Castelnou 3	42.17	3.01	41.875	41.769	2.685	2.572	Rodent species composition	4.9	7.25	Messinian	13.5	23.2							Montiure et al., 2006			13.5	23.2
888	La Tour	43.95	7.18	43.698	43.608	6.802	6.669	Rodent species composition	4.9	7.25	Messinian	10.1	19.7							Montiure et al., 2006			10.1	19.7
889	Brisighella	44.5	11.6	44.056	43.901	11.434	11.377	Rodent species composition	4.9	7.25	Messinian	8.9	18.6							Montiure et al., 2006			8.9	18.6
890	Ano Metochi M1–3	41	23.5	40.931	40.905	23.138	23.009	Rodent species composition	4.9	7.25	Messinian	10.1	19.7							Montiure et al., 2006			10.1	19.7
891	Salobreña	36.75	-3.59	36.389	36.26	-3.792	-3.863	Rodent species composition	4.9	7.25	Messinian	11.2	20.9							Montiure et al., 2006			11.2	20.9
892	Almenara-Casablanca M	40	0	39.674	39.558	-0.271	-0.366	Rodent species composition	4.9	7.25	Messinian	10.1	19.7							Montiure et al., 2006			10.1	19.7
893	La Grive St. Alban	46.6	5.23	45.968	45.899	4.281	4.193	Small mammal species composition	11.1	12.75	Tortonian							759	1559	Van Dam et al., 2006									759	1559
894	Steinheim (mittl.)	48.68	10.07	48.164	48.107	8.956	8.85	Small mammal species composition	11.1	12.75	Tortonian							272	1072	Van Dam et al., 2006									272	1072
895	Opole 2	50.66	17.95	50.341	50.304	16.645	16.518	Small mammal species composition	11.1	12.75	Tortonian							621	1421	Van Dam et al., 2006									621	1421
896	Castell de Barberà	41.52	2.13	40.821	40.747	1.423	1.344	Small mammal species composition	11.1	12.75	Tortonian							778	1578	Van Dam et al., 2006									778	1578
897	Escobosa	41.48	-2.37	40.677	40.591	-3.022	-3.095	Small mammal species composition	11.1	12.75	Tortonian							71	871	Van Dam et al., 2006									71	871
898	Hostalets de Pierola	41.53	1.77	40.822	40.747	1.067	0.988	Small mammal species composition	11.1	12.75	Tortonian							329	1129	Van Dam et al., 2006									329	1129
899	Sant Quirze	41.52	2.08	40.819	40.745	1.374	1.294	Small mammal species composition	11.1	12.75	Tortonian							547	1347	Van Dam et al., 2006									547	1347
900	Toril	41.1333	-1.3833	40.353	40.269	-2.033	-2.107	Small mammal species composition	11.1	12.75	Tortonian							150	950	Van Dam et al., 2006									150	950
901	Anwil	47.45	7.94	46.883	46.82	6.916	6.82	Small mammal species composition	11.1	12.75	Tortonian							652	1452	Van Dam et al., 2006									652	1452
902	Bayraktepe 1	37.05	36.77	37.232	37.25	36.12	36.06	Small mammal species composition	11.1	12.75	Tortonian							57	857	Van Dam et al., 2006									57	857
903	Yeni Eskihisar 1	37.32	28.06	37.273	37.267	27.396	27.335	Small mammal species composition	11.1	12.75	Tortonian							189	989	Van Dam et al., 2006									189	989
904	Götzendorf	48	16.58	47.692	47.648	15.57	15.445	Small mammal species composition	9.7	11.1	Tortonian							789	1589	Van Dam et al., 2006									789	1589
905	Jujurieux	46.04	5.41	45.491	45.413	4.585	4.487	Small mammal species composition	9.7	11.1	Tortonian							686	1486	Van Dam et al., 2006									686	1486
906	Hammerschmiede	47.9	10.61	47.461	47.398	9.65	9.533	Small mammal species composition	9.7	11.1	Tortonian							430	1230	Van Dam et al., 2006									430	1230
907	Rudabánya	48.71	20.63	48.493	48.461	19.56	19.427	Small mammal species composition	9.7	11.1	Tortonian							835	1635	Van Dam et al., 2006									835	1635
908	Belchatow 1	51.367	19.383	51.12	51.084	18.174	18.022	Small mammal species composition	9.7	11.1	Tortonian							548	1348	Van Dam et al., 2006									548	1348
909	Can Llobateres I	41.2	0.7	40.556	40.467	0.11	0.023	Small mammal species composition	9.7	11.1	Tortonian							778	1578	Van Dam et al., 2006									778	1578
910	Can Ponsic I	41.53	2.07	40.913	40.829	1.455	1.364	Small mammal species composition	9.7	11.1	Tortonian							547	1347	Van Dam et al., 2006									547	1347
911	Carrilanga	41.35	-1.61	40.66	40.564	-2.181	-2.266	Small mammal species composition	9.7	11.1	Tortonian							222	1022	Van Dam et al., 2006									222	1022
912	Casas Altas	40.3333	-1.2667	39.65	39.556	-1.807	-1.887	Small mammal species composition	9.7	11.1	Tortonian							255	1055	Van Dam et al., 2006									255	1055
913	Hostalets de Pierola	41.53	1.77	40.907	40.822	1.158	1.067	Small mammal species composition	9.7	11.1	Tortonian							0	777	Van Dam et al., 2006									0	777
914	Masia d.l. Roma 3	40.29	-1.02	39.612	39.518	-1.561	-1.641	Small mammal species composition	9.7	11.1	Tortonian							104	904	Van Dam et al., 2006									104	904
915	Nombrevilla 1	41.07	-1.21	40.388	40.293	-1.776	-1.86	Small mammal species composition	9.7	11.1	Tortonian							150	950	Van Dam et al., 2006									150	950
916	Pedregueras 2A	41.35	-1.61	40.66	40.564	-2.181	-2.266	Small mammal species composition	9.7	11.1	Tortonian							218	1018	Van Dam et al., 2006									218	1018
917	Pedregueras 2C	41.35	-1.61	40.66	40.564	-2.181	-2.266	Small mammal species composition	9.7	11.1	Tortonian							179	979	Van Dam et al., 2006									179	979
918	Peralejos 5	40.29	-1.02	39.612	39.518	-1.561	-1.641	Small mammal species composition	9.7	11.1	Tortonian							0	793	Van Dam et al., 2006									0	793
919	Nebelbergweg	47.38	7.63	46.877	46.805	6.723	6.613	Small mammal species composition	9.7	11.1	Tortonian							563	1363	Van Dam et al., 2006									563	1363
920	Sinap 8A	40.54	32.7	40.605	40.613	31.98	31.894	Small mammal species composition	9.7	11.1	Tortonian							35	835	Van Dam et al., 2006									35	835
921	Gritsev	49.975	27.16	49.907	49.896	25.999	25.852	Small mammal species composition	9.7	11.1	Tortonian							716	1516	Van Dam et al., 2006									716	1516
922	Kohfidisch	47.16	16.35	46.882	46.848	15.484	15.382	Small mammal species composition	8.7	9.7	Tortonian							587	1387	Van Dam et al., 2006									587	1387
923	Suchomasty	49.9	14.0667	49.575	49.535	13.091	12.977	Small mammal species composition	8.7	9.7	Tortonian							751	1551	Van Dam et al., 2006									751	1551
924	Ambérieu 2A	45.96	5.35	45.468	45.409	4.614	4.529	Small mammal species composition	8.7	9.7	Tortonian							464	1264	Van Dam et al., 2006									464	1264
925	Ambérieu 2C	45.96	5.35	45.468	45.409	4.614	4.529	Small mammal species composition	8.7	9.7	Tortonian							382	1182	Van Dam et al., 2006									382	1182
926	Douvre	46.36	5.68	45.874	45.816	4.926	4.838	Small mammal species composition	8.7	9.7	Tortonian							717	1517	Van Dam et al., 2006									717	1517
927	Lo Fournas 1993	43	3	42.466	42.402	2.393	2.322	Small mammal species composition	8.7	9.7	Tortonian							460	1260	Van Dam et al., 2006									460	1260
928	Montredon	44.4	3.36	43.872	43.809	2.701	2.624	Small mammal species composition	8.7	9.7	Tortonian							512	1312	Van Dam et al., 2006									512	1312
929	Soblay	45.1	5.5	44.611	44.553	4.796	4.714	Small mammal species composition	8.7	9.7	Tortonian							674	1474	Van Dam et al., 2006									674	1474
930	Kalfa and Buzhor	46.54	29.23	46.526	46.522	28.35	28.245	Small mammal species composition	8.7	9.7	Tortonian							114	914	Van Dam et al., 2006									114	914
931	Can Casablanques 2	41.55	2.07	40.999	40.933	1.519	1.454	Small mammal species composition	8.7	9.7	Tortonian							71	871	Van Dam et al., 2006									71	871
932	La Roma 1	40.29	-1	39.684	39.612	-1.484	-1.541	Small mammal species composition	8.7	9.7	Tortonian							166	966	Van Dam et al., 2006									166	966
933	La Roma 2	40.29	-1	39.684	39.612	-1.484	-1.541	Small mammal species composition	8.7	9.7	Tortonian							0	757	Van Dam et al., 2006									0	757
934	Masia d.l. Roma 11	40.29	-1.02	39.684	39.612	-1.504	-1.561	Small mammal species composition	8.7	9.7	Tortonian							174	974	Van Dam et al., 2006									174	974
935	Masia d.l. Roma 4C	40.29	-1.02	39.684	39.612	-1.504	-1.561	Small mammal species composition	8.7	9.7	Tortonian							0	777	Van Dam et al., 2006									0	777
936	Masia d.l. Roma 7	40.29	-1.02	39.684	39.612	-1.504	-1.561	Small mammal species composition	8.7	9.7	Tortonian							222	1022	Van Dam et al., 2006									222	1022
937	Masia d.l. Roma 9	40.29	-1.02	39.684	39.612	-1.504	-1.561	Small mammal species composition	8.7	9.7	Tortonian							356	1156	Van Dam et al., 2006									356	1156
938	Masa del Barbo 2A	40.66	-1.16	40.051	39.979	-1.654	-1.712	Small mammal species composition	8.7	9.7	Tortonian							340	1140	Van Dam et al., 2006									340	1140
939	Masa del Barbo 2B	40.66	-1.16	40.051	39.979	-1.654	-1.712	Small mammal species composition	8.7	9.7	Tortonian							192	992	Van Dam et al., 2006									192	992
940	Peralejos 4	40.29	-1.02	39.684	39.612	-1.504	-1.561	Small mammal species composition	8.7	9.7	Tortonian							150	950	Van Dam et al., 2006									150	950
941	Peralejos C	40.29	-1.02	39.684	39.612	-1.504	-1.561	Small mammal species composition	8.7	9.7	Tortonian							71	871	Van Dam et al., 2006									71	871
942	Puente Minero 2	40.5	-1	39.894	39.822	-1.491	-1.548	Small mammal species composition	8.7	9.7	Tortonian							64	864	Van Dam et al., 2006									64	864
943	Terrassa	41.56	2	41.008	40.942	1.449	1.384	Small mammal species composition	8.7	9.7	Tortonian							311	1111	Van Dam et al., 2006									311	1111
944	Bayraktepe 2	37.05	36.77	37.195	37.211	36.25	36.187	Small mammal species composition	8.7	9.7	Tortonian							130	930	Van Dam et al., 2006									130	930
945	Karaözü	39.2	35.97	39.328	39.341	35.377	35.306	Small mammal species composition	8.7	9.7	Tortonian							3	803	Van Dam et al., 2006									3	803
946	Eichkogel	48.1	16.2	47.843	47.819	15.367	15.293	Small mammal species composition	7.75	8.7	Tortonian							576	1376	Van Dam et al., 2006									576	1376
947	Ambérieu 1	45.96	5.35	45.51	45.468	4.674	4.614	Small mammal species composition	7.75	8.7	Tortonian							383	1183	Van Dam et al., 2006									383	1183
948	Ambérieu 3	45.96	5.35	45.51	45.468	4.674	4.614	Small mammal species composition	7.75	8.7	Tortonian							434	1234	Van Dam et al., 2006									434	1234
949	Bernardière	47.05	-1.26	46.489	46.438	-1.911	-1.969	Small mammal species composition	7.75	8.7	Tortonian							243	1043	Van Dam et al., 2006									243	1043
950	Dionay	45.2	5.22	44.748	44.706	4.572	4.514	Small mammal species composition	7.75	8.7	Tortonian							339	1139	Van Dam et al., 2006									339	1139
951	Lobrieu	44.5	5.3	44.049	44.008	4.675	4.62	Small mammal species composition	7.75	8.7	Tortonian							329	1129	Van Dam et al., 2006									329	1129
952	Mollon	45.95	5.24	45.498	45.456	4.565	4.506	Small mammal species composition	7.75	8.7	Tortonian							124	924	Van Dam et al., 2006									124	924
953	Dorn Dürkheim 1	49.77	8.26	49.369	49.332	7.413	7.338	Small mammal species composition	7.75	8.7	Tortonian							571	1371	Van Dam et al., 2006									571	1371
954	Lefkon	41.15	21.52	40.484	40.425	21.177	21.147	Small mammal species composition	7.75	8.7	Tortonian							262	1062	Van Dam et al., 2006									262	1062
955	Csákvár	47.4	18.5	47.186	47.165	17.685	17.612	Small mammal species composition	7.75	8.7	Tortonian							24	824	Van Dam et al., 2006									24	824
956	Sümeg	46.97	17.28	46.733	46.711	16.488	16.417	Small mammal species composition	7.75	8.7	Tortonian							513	1313	Van Dam et al., 2006									513	1313
957	Crevillente 2	38.4	-0.5	37.853	37.804	-0.898	-0.933	Small mammal species composition	7.75	8.7	Tortonian							104	904	Van Dam et al., 2006									104	904
958	La Gloria 10	40.23	-5.48	39.603	39.547	-5.884	-5.919	Small mammal species composition	7.75	8.7	Tortonian							0	793	Van Dam et al., 2006									0	793
959	Los Aguanaces 1	40.23	-5.5	39.603	39.547	-5.904	-5.939	Small mammal species composition	7.75	8.7	Tortonian							4	804	Van Dam et al., 2006									4	804
960	Los Aguanaces 3	40.23	-5.5	39.603	39.547	-5.904	-5.939	Small mammal species composition	7.75	8.7	Tortonian							0	777	Van Dam et al., 2006									0	777
961	Masada Ruea 2	40.3833	-1.0833	39.826	39.776	-1.53	-1.57	Small mammal species composition	7.75	8.7	Tortonian							35	835	Van Dam et al., 2006									35	835
962	Peralejos D	40.29	-1.02	39.734	39.684	-1.465	-1.504	Small mammal species composition	7.75	8.7	Tortonian							0	757	Van Dam et al., 2006									0	757
963	Puente Minero 3	40.5	-1	39.945	39.894	-1.451	-1.491	Small mammal species composition	7.75	8.7	Tortonian							71	871	Van Dam et al., 2006									71	871
964	Tortajada A	40.4	-1.0667	39.843	39.793	-1.514	-1.554	Small mammal species composition	7.75	8.7	Tortonian							0	763	Van Dam et al., 2006									0	763
965	Vivero de Pinos	40.33	-1.08	39.773	39.723	-1.525	-1.565	Small mammal species composition	7.75	8.7	Tortonian							71	871	Van Dam et al., 2006									71	871
966	Hayranlý 1	39.79	36.84	39.925	39.936	36.279	36.228	Small mammal species composition	7.75	8.7	Tortonian							216	1016	Van Dam et al., 2006									216	1016
967	Novo-Elizavetovka 2	47	31	47.022	47.022	30.173	30.099	Small mammal species composition	7.75	8.7	Tortonian							0	789	Van Dam et al., 2006									0	789
968	Mont Lubéron	44.28	5.95	43.92	43.84	5.437	5.327	Small mammal species composition	7.25	7.75	Tortonian							104	904	Van Dam et al., 2006									104	904
969	Pikermi 4	38.01	23.99	37.476	37.362	23.718	23.662	Small mammal species composition	7.25	7.75	Tortonian							205	1005	Van Dam et al., 2006									205	1005
970	Tardosbánya	47.6667	18.45	47.492	47.451	17.771	17.624	Small mammal species composition	7.25	7.75	Tortonian							657	1457	Van Dam et al., 2006									657	1457
971	Concud 2	40.3833	-1.1333	39.926	39.826	-1.501	-1.58	Small mammal species composition	7.25	7.75	Tortonian							144	944	Van Dam et al., 2006									144	944
972	Concud 3	40.3833	-1.1333	39.926	39.826	-1.501	-1.58	Small mammal species composition	7.25	7.75	Tortonian							288	1088	Van Dam et al., 2006									288	1088
973	Concud Barranco	40.4	-1.01	39.944	39.844	-1.379	-1.458	Small mammal species composition	7.25	7.75	Tortonian							166	966	Van Dam et al., 2006									166	966
974	Crevillente 15	38.25	-0.8	37.797	37.698	-1.122	-1.191	Small mammal species composition	7.25	7.75	Tortonian							32	832	Van Dam et al., 2006									32	832
975	Cubla	40.2167	-1.0667	39.76	39.66	-1.431	-1.509	Small mammal species composition	7.25	7.75	Tortonian							228	1028	Van Dam et al., 2006									228	1028
976	Los Mansuetos	40.4	-1.1	39.943	39.843	-1.468	-1.547	Small mammal species composition	7.25	7.75	Tortonian							144	944	Van Dam et al., 2006									144	944
977	Masada del Valle 2	40.12	-0.26	39.674	39.577	-0.627	-0.706	Small mammal species composition	7.25	7.75	Tortonian							42	842	Van Dam et al., 2006									42	842
978	Masada del Valle 3	40.12	-0.26	39.674	39.577	-0.627	-0.706	Small mammal species composition	7.25	7.75	Tortonian							130	930	Van Dam et al., 2006									130	930
979	Masada del Valle 4	40.12	-0.26	39.674	39.577	-0.627	-0.706	Small mammal species composition	7.25	7.75	Tortonian							71	871	Van Dam et al., 2006									71	871
980	Masada del Valle 5	40.12	-0.26	39.674	39.577	-0.627	-0.706	Small mammal species composition	7.25	7.75	Tortonian							71	871	Van Dam et al., 2006									71	871
981	Masada Ruea 3	40.3833	-1.0833	39.926	39.826	-1.451	-1.53	Small mammal species composition	7.25	7.75	Tortonian							0	793	Van Dam et al., 2006									0	793
982	Masada Ruea 4	40.3833	-1.0833	39.926	39.826	-1.451	-1.53	Small mammal species composition	7.25	7.75	Tortonian							24	824	Van Dam et al., 2006									24	824
983	Tortajada	40.4	-1.0667	39.943	39.843	-1.435	-1.514	Small mammal species composition	7.25	7.75	Tortonian							166	966	Van Dam et al., 2006									166	966
984	Tortajada C	40.4	-1.0667	39.943	39.843	-1.435	-1.514	Small mammal species composition	7.25	7.75	Tortonian							228	1028	Van Dam et al., 2006									228	1028
985	Tortajada D	40.4	-1.0667	39.943	39.843	-1.435	-1.514	Small mammal species composition	7.25	7.75	Tortonian							166	966	Van Dam et al., 2006									166	966
986	Villalba Baja 2	40.4333	-1.0833	39.976	39.876	-1.452	-1.532	Small mammal species composition	7.25	7.75	Tortonian							166	966	Van Dam et al., 2006									166	966
987	Düzyayla	39.92	37.31	40.04	40.064	36.848	36.746	Small mammal species composition	7.25	7.75	Tortonian							244	1044	Van Dam et al., 2006									244	1044
988	Novoukrainka 2	48.3	31.5	48.328	48.331	30.777	30.619	Small mammal species composition	7.25	7.75	Tortonian							86	886	Van Dam et al., 2006									86	886
989	Lissieu	45.87	4.75	45.592	45.493	4.343	4.2	Small mammal species composition	4.9	7.25	Messinian							368	1168	Van Dam et al., 2006									368	1168
990	Ano Metochi 3	41	23.5	40.931	40.905	23.138	23.009	Small mammal species composition	4.9	7.25	Messinian							0	701	Van Dam et al., 2006									0	701
991	Maramena	41.29	23.81	41.225	41.199	23.442	23.311	Small mammal species composition	4.9	7.25	Messinian							418	1218	Van Dam et al., 2006									418	1218
992	Polgardi 2	47.05	18.3	46.921	46.873	17.813	17.642	Small mammal species composition	4.9	7.25	Messinian							189	989	Van Dam et al., 2006									189	989
993	Baccinello V3	42.7	11.1	42.254	42.099	10.947	10.895	Small mammal species composition	4.9	7.25	Messinian							0	779	Van Dam et al., 2006									0	779
994	Brisighella	44.5	11.6	44.056	43.901	11.434	11.377	Small mammal species composition	4.9	7.25	Messinian							91	891	Van Dam et al., 2006									91	891
995	Alcoy barranco	38.7	-0.47	38.37	38.252	-0.717	-0.804	Small mammal species composition	4.9	7.25	Messinian							0	793	Van Dam et al., 2006									0	793
996	Arquillo 4	40.4	-1.1	40.063	39.943	-1.373	-1.468	Small mammal species composition	4.9	7.25	Messinian							35	835	Van Dam et al., 2006									35	835
997	Bacochas 1	37.6	-2.8	37.247	37.121	-3.019	-3.096	Small mammal species composition	4.9	7.25	Messinian							0	718	Van Dam et al., 2006									0	718
998	Celadas 2	40.48	-1.15	40.143	40.022	-1.424	-1.52	Small mammal species composition	4.9	7.25	Messinian							144	944	Van Dam et al., 2006									144	944
999	La Gloria 5	40.38	-1.06	40.043	39.923	-1.333	-1.428	Small mammal species composition	4.9	7.25	Messinian							0	788.5	Van Dam et al., 2006									0	788.5
1000	La Gloria 6	40.23	-5.48	39.851	39.716	-5.727	-5.813	Small mammal species composition	4.9	7.25	Messinian							98	898	Van Dam et al., 2006									98	898
1001	Las Casiones	40.43	-1.11	40.093	39.973	-1.383	-1.479	Small mammal species composition	4.9	7.25	Messinian							130	930	Van Dam et al., 2006									130	930
1002	Las Casiones superior	40.43	-1.11	40.093	39.973	-1.383	-1.479	Small mammal species composition	4.9	7.25	Messinian							144	944	Van Dam et al., 2006									144	944
1003	Masada del Valle 7	40.12	-0.26	39.792	39.674	-0.532	-0.627	Small mammal species composition	4.9	7.25	Messinian							166	966	Van Dam et al., 2006									166	966
1004	Valdecebro 3	40.35	-1.0333	40.014	39.894	-1.306	-1.401	Small mammal species composition	4.9	7.25	Messinian							206	1006	Van Dam et al., 2006									206	1006
1005	Valdecebro 6	40.35	-1.03	40.014	39.894	-1.302	-1.398	Small mammal species composition	4.9	7.25	Messinian							35	835	Van Dam et al., 2006									35	835
1006	Amasya	37.65	28.48	37.639	37.633	28.179	28.072	Small mammal species composition	4.9	7.25	Messinian							4	804	Van Dam et al., 2006									4	804
1007	Kavurca	40.56	33.58	40.608	40.622	33.224	33.097	Small mammal species composition	4.9	7.25	Messinian							67	867	Van Dam et al., 2006									67	867
1008	Odessa	46.47	30.73	46.484	46.486	30.242	30.069	Small mammal species composition	4.9	7.25	Messinian							60	860	Van Dam et al., 2006									60	860
1009	Mataschen	46.1	16	45.464	45.31	15.69	15.616	Co-existence Approach	7.25	11.6	Tortonian	13.25	17.25	3.7	7.7	24.8	28.8	867	1355	Bruch et al., 2011	Kovar-Eder and Hably 2006		13.25	17.25	3.7	7.7	24.8	28.8	867	1355
1010	Velikaya Began 856 well	48.23	22.67	48.111	48.029	21.904	21.458	Co-existence Approach	7.1	11.5	Messinian	13.2	17.2	3.4	7.4	22.25	26.25	951	1351	Bruch et al., 2011	Syabryaj et al., 2007		13.2	17.2	3.4	7.4	22.25	26.25	951	1351
1011	Samos	37.75	26.97	37.675	37.673	26.294	26.284	Co-existence Approach	11.2	11.2	Tortonian							830	1281	Bruch et al., 2011	Bruch et al., 2004								830	1281
1012	Velona	43.05	11.5	42.606	42.451	11.343	11.289	Climate Amplitude Method	4.9	7.25	Messinian	15.6	19.8	1.85	12.85	23.15	28.95	1099	1293	Bruch et al., 2002			15.6	19.8	1.85	12.85	23.15	28.95	1099	1293
1013	Velona	43.05	11.5	42.606	42.451	11.343	11.289	Climate Amplitude Method	4.9	7.25	Messinian	15.6	21.7	4.25	15.25	23.15	28.95	1099	1293	Bruch et al., 2002			15.6	21.7	4.25	15.25	23.15	28.95	1099	1293
1014	Velona	43.05	11.5	42.606	42.451	11.343	11.289	Climate Amplitude Method	4.9	7.25	Messinian	15.6	21.7	1.85	12.85	22.75	28.55	970	1293	Bruch et al., 2002			15.6	21.7	1.85	12.85	22.75	28.55	970	1293
1015	Velona	43.05	11.5	42.606	42.451	11.343	11.289	Climate Amplitude Method	4.9	7.25	Messinian	17.4	19.8	1.85	12.85	23.15	28.95	1099	1293	Bruch et al., 2002			17.4	19.8	1.85	12.85	23.15	28.95	1099	1293
1016	Velona	43.05	11.5	42.606	42.451	11.343	11.289	Climate Amplitude Method	4.9	7.25	Messinian	17.4	19.8	1.85	12.85	22.75	28.55	582	873	Bruch et al., 2002			17.4	19.8	1.85	12.85	22.75	28.55	582	873
1017	Velona	43.05	11.5	42.606	42.451	11.343	11.289	Climate Amplitude Method	4.9	7.25	Messinian	15.6	19.8	1.85	12.85	23.35	29.15	1099	1293	Bruch et al., 2002			15.6	19.8	1.85	12.85	23.35	29.15	1099	1293
1018	Velona	43.05	11.5	42.606	42.451	11.343	11.289	Climate Amplitude Method	4.9	7.25	Messinian	15.6	19.8	0.85	11.85	23.15	28.95	1099	1293	Bruch et al., 2002			15.6	19.8	0.85	11.85	23.15	28.95	1099	1293
1019	Velona	43.05	11.5	42.606	42.451	11.343	11.289	Climate Amplitude Method	4.9	7.25	Messinian	15.6	19.8	1.85	12.85	23.15	28.95	1099	1293	Bruch et al., 2002			15.6	19.8	1.85	12.85	23.15	28.95	1099	1293
1020	Velona	43.05	11.5	42.606	42.451	11.343	11.289	Climate Amplitude Method	4.9	7.25	Messinian	15.6	19.8	1.85	12.85	23.15	28.95	1099	1293	Bruch et al., 2002			15.6	19.8	1.85	12.85	23.15	28.95	1099	1293
1021	Velona	43.05	11.5	42.606	42.451	11.343	11.289	Climate Amplitude Method	4.9	7.25	Messinian	15.6	19.8	1.85	12.85	22.75	28.55	1099	1293	Bruch et al., 2002			15.6	19.8	1.85	12.85	22.75	28.55	1099	1293
1022	Velona	43.05	11.5	42.606	42.451	11.343	11.289	Climate Amplitude Method	4.9	7.25	Messinian	15.6	19.8	1.85	12.85	23.15	28.95	1099	1293	Bruch et al., 2002			15.6	19.8	1.85	12.85	23.15	28.95	1099	1293
1023	Velona	43.05	11.5	42.606	42.451	11.343	11.289	Climate Amplitude Method	4.9	7.25	Messinian	17.4	19.8	1.85	12.85	24.35	30.15	1099	1584	Bruch et al., 2002			17.4	19.8	1.85	12.85	24.35	30.15	1099	1584
1024	Velona	43.05	11.5	42.606	42.451	11.343	11.289	Climate Amplitude Method	4.9	7.25	Messinian	15.6	19.8	1.85	12.85	23.35	29.15	1099	1293	Bruch et al., 2002			15.6	19.8	1.85	12.85	23.35	29.15	1099	1293
1025	Velona	43.05	11.5	42.606	42.451	11.343	11.289	Climate Amplitude Method	4.9	7.25	Messinian	17.4	19.8	1.85	12.85	23.15	28.95	1099	1293	Bruch et al., 2002			17.4	19.8	1.85	12.85	23.15	28.95	1099	1293
1026	Velona	43.05	11.5	42.606	42.451	11.343	11.289	Climate Amplitude Method	4.9	7.25	Messinian	17.4	19.8	1.85	12.85	23.15	28.95	1099	1293	Bruch et al., 2002			17.4	19.8	1.85	12.85	23.15	28.95	1099	1293
1027	Velona	43.05	11.5	42.606	42.451	11.343	11.289	Climate Amplitude Method	4.9	7.25	Messinian	17.4	19.8	1.85	12.85	24.35	30.15	1099	1584	Bruch et al., 2002			17.4	19.8	1.85	12.85	24.35	30.15	1099	1584
1028	Velona	43.05	11.5	42.606	42.451	11.343	11.289	Climate Amplitude Method	4.9	7.25	Messinian	17.4	19.8	1.85	12.85	23.15	28.95	1099	1293	Bruch et al., 2002			17.4	19.8	1.85	12.85	23.15	28.95	1099	1293
1029	Velona	43.05	11.5	42.606	42.451	11.343	11.289	Climate Amplitude Method	4.9	7.25	Messinian	15.6	19.8	1.85	12.85	23.15	28.95	1099	1293	Bruch et al., 2002			15.6	19.8	1.85	12.85	23.15	28.95	1099	1293
1030	Velona	43.05	11.5	42.606	42.451	11.343	11.289	Climate Amplitude Method	4.9	7.25	Messinian	15.6	22.9	4.25	15.25	23.15	28.95	1099	1293	Bruch et al., 2002			15.6	22.9	4.25	15.25	23.15	28.95	1099	1293
1031	Velona	43.05	11.5	42.606	42.451	11.343	11.289	Climate Amplitude Method	4.9	7.25	Messinian	15.6	19.8	1.85	12.85	23.15	28.95	1099	1293	Bruch et al., 2002			15.6	19.8	1.85	12.85	23.15	28.95	1099	1293
1032	Velona	43.05	11.5	42.606	42.451	11.343	11.289	Climate Amplitude Method	4.9	7.25	Messinian	15.6	19.8	1.85	12.85	23.35	29.15	1099	1552	Bruch et al., 2002			15.6	19.8	1.85	12.85	23.35	29.15	1099	1552
1033	Velona	43.05	11.5	42.606	42.451	11.343	11.289	Climate Amplitude Method	4.9	7.25	Messinian	15.6	19.8	1.85	12.85	23.15	28.95	1099	1293	Bruch et al., 2002			15.6	19.8	1.85	12.85	23.15	28.95	1099	1293
1034	Velona	43.05	11.5	42.606	42.451	11.343	11.289	Climate Amplitude Method	4.9	7.25	Messinian	15.6	21.7	6.7	17.7	23.15	28.95	1099	1293	Bruch et al., 2002			15.6	21.7	6.7	17.7	23.15	28.95	1099	1293
1035	Velona	43.05	11.5	42.606	42.451	11.343	11.289	Climate Amplitude Method	4.9	7.25	Messinian	15.6	19.8	1.85	12.85	23.35	29.15	1099	1293	Bruch et al., 2002			15.6	19.8	1.85	12.85	23.35	29.15	1099	1293
1036	Velona	43.05	11.5	42.606	42.451	11.343	11.289	Climate Amplitude Method	4.9	7.25	Messinian	17.4	22.9	6.7	17.7	23.15	28.95	1099	1293	Bruch et al., 2002			17.4	22.9	6.7	17.7	23.15	28.95	1099	1293
1037	Velona	43.05	11.5	42.606	42.451	11.343	11.289	Climate Amplitude Method	4.9	7.25	Messinian	17.4	19.8	1.85	12.85	23.15	28.95	1099	1293	Bruch et al., 2002			17.4	19.8	1.85	12.85	23.15	28.95	1099	1293
1038	Velona	43.05	11.5	42.606	42.451	11.343	11.289	Co-existence Approach	4.9	7.25	Messinian	11.6	18.4	-0.3	9.4	23	27.8	740	1234	Bruch et al., 2002			11.6	18.4	-0.3	9.4	23	27.8	740	1234
1039	Velona	43.05	11.5	42.606	42.451	11.343	11.289	Co-existence Approach	4.9	7.25	Messinian	15	19	5	9.4	25.2	29.2	1034	1434	Bruch et al., 2002			15	19	5	9.4	25.2	29.2	1034	1434
1040	Velona	43.05	11.5	42.606	42.451	11.343	11.289	Co-existence Approach	4.9	7.25	Messinian	15	19	5	9.4	23.4	27.4	814.5	1214.5	Bruch et al., 2002			15	19	5	9.4	23.4	27.4	814.5	1214.5
1041	Velona	43.05	11.5	42.606	42.451	11.343	11.289	Co-existence Approach	4.9	7.25	Messinian	15	19	5	9.4	24.25	28.25	823	1322	Bruch et al., 2002			15	19	5	9.4	24.25	28.25	823	1322
1042	Velona	43.05	11.5	42.606	42.451	11.343	11.289	Co-existence Approach	4.9	7.25	Messinian	15	19	5	9.4	24.25	28.25	823	1281	Bruch et al., 2002			15	19	5	9.4	24.25	28.25	823	1281
1043	Velona	43.05	11.5	42.606	42.451	11.343	11.289	Co-existence Approach	4.9	7.25	Messinian	15	19	5	9.4	24.25	28.25	823	1322	Bruch et al., 2002			15	19	5	9.4	24.25	28.25	823	1322
1044	Velona	43.05	11.5	42.606	42.451	11.343	11.289	Co-existence Approach	4.9	7.25	Messinian	15	19	5	9.4	24.25	28.25	823	1281	Bruch et al., 2002			15	19	5	9.4	24.25	28.25	823	1281
1045	Velona	43.05	11.5	42.606	42.451	11.343	11.289	Co-existence Approach	4.9	7.25	Messinian	15	19	5	9.4	23.4	27.4	823	1281	Bruch et al., 2002			15	19	5	9.4	23.4	27.4	823	1281
1046	Velona	43.05	11.5	42.606	42.451	11.343	11.289	Co-existence Approach	4.9	7.25	Messinian	15	19	5	9.4	23.4	27.4	823	1281	Bruch et al., 2002			15	19	5	9.4	23.4	27.4	823	1281
1047	Velona	43.05	11.5	42.606	42.451	11.343	11.289	Co-existence Approach	4.9	7.25	Messinian	15	19	5	9.4	23.4	27.4	823	1281	Bruch et al., 2002			15	19	5	9.4	23.4	27.4	823	1281
1048	Velona	43.05	11.5	42.606	42.451	11.343	11.289	Co-existence Approach	4.9	7.25	Messinian	11.6	18.4	-0.3	9.4	22.8	27.8	740	1234	Bruch et al., 2002			11.6	18.4	-0.3	9.4	22.8	27.8	740	1234
1049	Velona	43.05	11.5	42.606	42.451	11.343	11.289	Co-existence Approach	4.9	7.25	Messinian	11.6	18.4	-0.3	9.4	22.8	27.8	740	1234	Bruch et al., 2002			11.6	18.4	-0.3	9.4	22.8	27.8	740	1234
1050	Velona	43.05	11.5	42.606	42.451	11.343	11.289	Co-existence Approach	4.9	7.25	Messinian	15	19	5	9.4	23.4	27.4	823	1281	Bruch et al., 2002			15	19	5	9.4	23.4	27.4	823	1281
1051	Velona	43.05	11.5	42.606	42.451	11.343	11.289	Co-existence Approach	4.9	7.25	Messinian	15	19	5	9.4	23.4	27.4	823	1281	Bruch et al., 2002			15	19	5	9.4	23.4	27.4	823	1281
1052	Velona	43.05	11.5	42.606	42.451	11.343	11.289	Co-existence Approach	4.9	7.25	Messinian	9.1	21.7	-2.7	13.6	19.6	27.8	641	1281	Bruch et al., 2002			9.1	21.7	-2.7	13.6	19.6	27.8	641	1281
1053	Velona	43.05	11.5	42.606	42.451	11.343	11.289	Co-existence Approach	4.9	7.25	Messinian	15	19	5	9.4	24.25	28.25	1034	1434	Bruch et al., 2002			15	19	5	9.4	24.25	28.25	1034	1434
1054	Velona	43.05	11.5	42.606	42.451	11.343	11.289	Co-existence Approach	4.9	7.25	Messinian	15	19	5	9.4	24.25	28.25	823	1281	Bruch et al., 2002			15	19	5	9.4	24.25	28.25	823	1281
1055	Velona	43.05	11.5	42.606	42.451	11.343	11.289	Co-existence Approach	4.9	7.25	Messinian	15	19	5	9.4	24.25	28.25	823	1281	Bruch et al., 2002			15	19	5	9.4	24.25	28.25	823	1281
1056	Velona	43.05	11.5	42.606	42.451	11.343	11.289	Co-existence Approach	4.9	7.25	Messinian	11.6	18.4	-0.3	9.4	23	27.8	740	1234	Bruch et al., 2002			11.6	18.4	-0.3	9.4	23	27.8	740	1234
1057	Velona	43.05	11.5	42.606	42.451	11.343	11.289	Co-existence Approach	4.9	7.25	Messinian	15	19	5	9.4	24.25	28.25	1034	1434	Bruch et al., 2002			15	19	5	9.4	24.25	28.25	1034	1434
1058	Velona	43.05	11.5	42.606	42.451	11.343	11.289	Co-existence Approach	4.9	7.25	Messinian	15	19	5	9.4	25.2	29.2	1034	1434	Bruch et al., 2002			15	19	5	9.4	25.2	29.2	1034	1434
1059	Velona	43.05	11.5	42.606	42.451	11.343	11.289	Co-existence Approach	4.9	7.25	Messinian	15	19	5	9.4	24.25	28.25	1034	1434	Bruch et al., 2002			15	19	5	9.4	24.25	28.25	1034	1434
1060	Velona	43.05	11.5	42.606	42.451	11.343	11.289	Co-existence Approach	4.9	7.25	Messinian	15	19	5	9.4	24.25	28.25	1034	1434	Bruch et al., 2002			15	19	5	9.4	24.25	28.25	1034	1434
1061	Velona	43.05	11.5	42.606	42.451	11.343	11.289	Co-existence Approach	4.9	7.25	Messinian	15	19	5	9.4	25.2	29.2	1034	1434	Bruch et al., 2002			15	19	5	9.4	25.2	29.2	1034	1434
1062	Velona	43.05	11.5	42.606	42.451	11.343	11.289	Co-existence Approach	4.9	7.25	Messinian	15	19	5	9.4	24.25	28.25	814.5	1214.5	Bruch et al., 2002			15	19	5	9.4	24.25	28.25	814.5	1214.5
1063	Velona	43.05	11.5	42.606	42.451	11.343	11.289	Co-existence Approach	4.9	7.25	Messinian	15.1	19.1	5	9.4	22.45	26.45	823	1234	Bruch et al., 2002			15.1	19.1	5	9.4	22.45	26.45	823	1234
1064	Arjuzanx	44.8	-0.6	44.303	44.008	-1.128	-1.411	Co-existence Approach	5.3	11.6	Messinian			6.2	13.3	24.3	28.3			Utescher et al., 2010					6.2	13.3	24.3	28.3
1066	Burgos	41.6	-3.7	40.947	40.774	-4.198	-4.334	Co-existence Approach	8.7	11.2	Tortonian			7	11	24.5	28.5			Utescher et al., 2010					7	11	24.5	28.5
1067	Chaidamu	38.23	92.05	38.093	38.018	91.058	90.459	Co-existence Approach	5.33	11.6	Messinian			3.2	7.2	22.8	28.2			Utescher et al., 2010					3.2	7.2	22.8	28.2
1068	Cocchati complex	45	38	45.142	45.19	37.332	37.074	Co-existence Approach	7.1	11.5	Messinian			5.6	11.7	24.4	28.4			Utescher et al., 2010	Mai, 1995				5.6	11.7	24.4	28.4
1069	Dunhuang	40	94.78	40.351	40.747	94.584	94.358	Co-existence Approach	5.33	11.6	Messinian			6.6	13.6	23	28.1			Utescher et al., 2010					6.6	13.6	23	28.1
1070	East China Sea	30.72	122.45	32.109	32.921	122.671	122.799	Co-existence Approach	5.33	11.6	Messinian			3.8	12.5	23.6	28.1			Utescher et al., 2010					3.8	12.5	23.6	28.1
1071	Felsotarkany	47.067	20.417	46.847	46.814	19.431	19.309	Co-existence Approach	9.7	11.1	Tortonian			4.4	8.4	19.65	23.65			Utescher et al., 2010					4.4	8.4	19.65	23.65
1072	Gram clay pit (J11)	55.29	9.04	54.926	54.875	7.994	7.854	Co-existence Approach	8.5	10.3	Tortonian			1.8	12.5	23.6	27.9			Utescher et al., 2010					1.8	12.5	23.6	27.9
1073	Grodno complex	53.7	25.8	53.629	53.577	24.773	24.193	Co-existence Approach	7.25	7.75	Tortonian			-11.5	4.4	19.3	28.1			Utescher et al., 2010					-11.5	4.4	19.3	28.1
1074	Hengduan Mountains	23.47	100.7	23.569	23.626	101.631	102.218	Co-existence Approach	5.3	11.6	Messinian			3.8	12.5	24.3	28.3			Utescher et al., 2010					3.8	12.5	24.3	28.3
1075	Höllgraben	47.25	15.58	47.009	46.86	14.861	14.462	Co-existence Approach	11	11.5	Tortonian			3.9	7.9	24.2	28.2			Utescher et al., 2010					3.9	7.9	24.2	28.2
1077	Magadan H2811	59	150	59.843	60.33	151.174	151.892	Co-existence Approach	5.3	11.6	Messinian			-9.5	6.4	17.8	25.6			Utescher et al., 2010					-9.5	6.4	17.8	25.6
1078	Mistrin	48.97	17.17	48.754	48.62	16.379	15.939	Co-existence Approach	10.6	11	Tortonian			-1.1	14.8	24.55	28.55			Utescher et al., 2010					-1.1	14.8	24.55	28.55
1079	Nazilli Haskoy	37.9	28.2	37.875	37.866	27.743	27.629	Co-existence Approach	7.25	11.6	Tortonian			5	16.7	24.7	26.7			Utescher et al., 2010					5	16.7	24.7	26.7
1080	Nekkeiveem H3658	69	165	70.023	70.62	167.089	168.587	Co-existence Approach	5.3	11.6	Messinian			-12.9	7.8	17.5	25.6			Utescher et al., 2010					-12.9	7.8	17.5	25.6
1081	Omoloj H4954	70	133	70.901	71.477	133.467	133.979	Co-existence Approach	5.33	11.6	Messinian			-3.8	6.4	21.65	25.65			Utescher et al., 2010					-3.8	6.4	21.65	25.65
1082	Osinov H368	64	175	64.543	64.847	177.017	178.237	Co-existence Approach	5.33	11.6	Messinian			-2.7	7.8	19.3	25.6			Utescher et al., 2010					-2.7	7.8	19.3	25.6
1083	Penafiel	41.4	-4.2	40.852	40.528	-4.605	-4.847	Co-existence Approach	5.33	11.6	Messinian			6.65	10.65	22.35	26.35			Utescher et al., 2010					6.65	10.65	22.35	26.35
1084	Povoa 3	39.2	-8.9	38.587	38.224	-9.213	-9.399	Co-existence Approach	5.33	11.6	Messinian			7.15	11.15	22.85	26.85			Utescher et al., 2010					7.15	11.15	22.85	26.85
1085	Qinghai-Xizang	29.65	91.1	27.547	26.359	90.863	90.617	Co-existence Approach	5.33	11.6	Messinian			3.8	14.8	21.7	28.1			Utescher et al., 2010					3.8	14.8	21.7	28.1
1086	Resident H3459	59	143	59.9	60.421	143.992	144.6	Co-existence Approach	5.33	11.6	Messinian			-12.9	6.4	18.9	25.6			Utescher et al., 2010					-12.9	6.4	18.9	25.6
1087	Rudabánya	48.71	20.63	48.493	48.461	19.56	19.427	Co-existence Approach	9.7	11.1	Tortonian			3.05	7.05	23.95	27.95			Utescher et al., 2010					3.05	7.05	23.95	27.95
1088	Seu d'Urgel	42.3	1.6	41.674	41.588	0.962	0.867	Co-existence Approach	9.7	11.1	Tortonian			1.3	5.3	24.2	28.2			Utescher et al., 2010					1.3	5.3	24.2	28.2
1089	Soblay	45.1	5.5	44.611	44.553	4.796	4.714	Co-existence Approach	5.33	11.6	Messinian			5	13.3	23.4	27.4			Utescher et al., 2010					5	13.3	23.4	27.4
1090	Sremska	45.1	19.45	44.928	44.816	18.804	18.431	Co-existence Approach	7.1	11.5	Messinian			-0.5	9.6	25.25	29.25			Utescher et al., 2010					-0.5	9.6	25.25	29.25
1091	Tarragona_E2_1	40.84	1.15	40.37	40.094	0.717	0.459	Co-existence Approach	5.33	11.6	Messinian			8.85	12.85	25.6	29.6			Utescher et al., 2010					8.85	12.85	25.6	29.6
1092	Temmir-haj H4954	71	132	71.96	72.517	132.976	133.589	Co-existence Approach	5.33	11.6	Messinian			-2.85	1.15	20.7	24.7			Utescher et al., 2010					-2.85	1.15	20.7	24.7
1093	Triopetra	35.11	24.54	34.527	34.386	24.269	24.204	Co-existence Approach	5.33	9	Messinian			5	12.5	24.5	28.5			Utescher et al., 2010					5	12.5	24.5	28.5
1094	Valea Neagra	46.4	22.8	46.281	46.203	22.085	21.686	Co-existence Approach	10.6	11.5	Tortonian			3.9	7.9	23.95	27.95			Utescher et al., 2010					3.9	7.9	23.95	27.95
1095	Vaugines	43.78	5.42	43.375	43.133	4.875	4.58	Co-existence Approach	5.33	11.6	Messinian			5	13.6	24.75	28.75			Utescher et al., 2010					5	13.6	24.75	28.75
1096	Vilella	42.3	2.9	41.764	41.618	2.317	2.152	Co-existence Approach	8.7	11.2	Tortonian			3.35	7.35	23.85	27.85			Utescher et al., 2010					3.35	7.35	23.85	27.85
1097	Weihe	34.54	109.08	35.386	35.861	108.226	107.942	Co-existence Approach	5.33	11.6	Messinian			3.8	13.3	22.8	28.1			Utescher et al., 2010					3.8	13.3	22.8	28.1
1098	Yana H4967	59	149	59.852	60.344	150.148	150.851	Co-existence Approach	5.33	11.6	Messinian			-8.1	6.4	15.9	25.6			Utescher et al., 2010					-8.1	6.4	15.9	25.6
1099	Yanran H3690	68	161	68.726	69.138	162.991	164.215	Co-existence Approach	5.33	11.6	Messinian			-12.9	7.8	17.5	25.6			Utescher et al., 2010					-12.9	7.8	17.5	25.6
1100	Gotse Delchev Basin	41.62	23.77	41.559	41.526	23.418	23.246	Co-existence Approach	4.9	6.5	Messinian	11.6	18.4	-0.3	7.5	19.3	26.8	471	1520	Ivanov et al., 2011			11.6	18.4	-0.3	7.5	19.3	26.8	471	1520
1101	Xianfeng	29.75	108.92	30.321	30.982	109.027	109.163	CLAMP (leaf physiognomy)	5.3	11.6	Messinian	12.7	18.7					1226	1678	Xing et al., 2010			12.7	18.7					1226	1678
1102	Xianfeng	29.75	108.92	30.321	30.982	109.027	109.163	Leaf Margin Analysis	5.33	11.6	Messinian	14.2	20.2							Xing et al., 2010			14.2	20.2
1103	Brandywine	36.7	-76.85	36.242	35.908	-74.774	-73.407	Co-existence Approach	6.5	11.2	Messinian	12.75	16.75	0.1	7.8	21.75	25.75	851.5	1251.5	Stults and Axsmith, 2010			12.75	16.75	0.1	7.8	21.75	25.75	851.5	1251.5
1104	Vrysses	35.37	24.2	34.886	34.764	23.975	23.919	Co-existence Approach	6	7.5	Messinian	13.7	17.7					600	1000	Zidianakis et al., 2007			13.7	17.7					600	1000
1105	Vrysses	35.37	24.2	34.886	34.764	23.975	23.919	CLAMP (leaf physiognomy)	6	7.5	Messinian	12.5	18.5							Zidianakis et al., 2007			12.5	18.5
1106	Sivas Gemerek	37	38	35.876	35.593	37.873	37.847	Co-existence Approach	7.25	9	Tortonian	17	21	7.4	11.4	25.7	29.7	1180.5	1580.5	Kayseri and Akgün, 2008			17	21	7.4	11.4	25.7	29.7	1180.5	1580.5
1107	Toundzha Basin	42.17	26.58	42.133	42.116	26.159	25.999	Co-existence Approach	5.3	7.1	Messinian	13.1	17.1	2.75	6.75	24	28	870	1270	Ivanov et al., 2007b			13.1	17.1	2.75	6.75	24	28	870	1270
1108	Toundzha Basin	42.17	26.58	42.133	42.116	26.159	25.999	Co-existence Approach	5.3	7.1	Messinian	13.6	18.4	2.4	9.4	22.45	26.45	740	1206	Ivanov et al., 2007b			13.6	18.4	2.4	9.4	22.45	26.45	740	1206
1109	Sønder Vium	55.83	8.43	55.429	54.845	7.291	5.802	Co-existence Approach	7.25	11.6	Tortonian	15.5	21.1	-2	15.5	-2	27.5			Larsson et al., 2011			15.5	21.1	-2	15.5	-2	27.5
1110	Velikaya Began 856 well	48.23	22.67	48.111	48.029	21.904	21.458	Co-existence Approach	4.9	7.25	Messinian			-2	2	-2	24.8			Syabryaj et al., 2007					-2	2	-2	24.8
1111	Kimble Homestead	44.5	-119.633	44.671	44.673	-116.786	-116.746	Palaeosol Analysis	7.2	7.3	Tortonian							500	850	Retallack et al., 2002									500	850
1112	Vrysses	35.37	24.2	34.886	34.764	23.975	23.919	CLAMP (leaf physiognomy)	6	7.5	Tortonian	12.5	18.5							Zidianakis et al., 2007			12.5	18.5
1113	Vrysses	35.37	24.2	34.886	34.764	23.975	23.919	Co-existence Approach	6	7.5	Tortonian	13.7	17.7					600	1000	Zidianakis et al., 2007			13.7	17.7					600	1000
1114	Tardosbánya 3	47.6667	18.45	47.486	47.46	17.75	17.656	Herpetofaunal Composition	6.8	7.7	Tortonian							106	656	Fejfar et al., 1997	Böhme et al., 2008								106	656
1115	Dorheim	50.35	8.57	50.107	49.954	8.025	7.696	Co-existence Approach	5	9	Tortonian	13.05	17.05					897	1297	Steppuhn et al., 2007			13.05	17.05					897	1297
1116	Gabbro	43.5	10.35	42.842	43.016	10.129	10.186	Co-existence Approach	5.3	9	Tortonian	14.6	18.6					876	1548	Steppuhn et al., 2007			14.6	18.6					876	1548
1117	Barbara	34.88	25	34.456	34.16	24.8	24.663	Co-existence Approach	5.3	9	Tortonian	15	19					540.5	940.5	Steppuhn et al., 2007			15	19					540.5	940.5
1118	Triopetra	35.11	24.54	34.527	34.386	24.269	24.204	Co-existence Approach	5.33	9	Tortonian			5	12.5	24.5	28.5			Utescher et al., 2010					5	12.5	24.5	28.5
1119	Tatlanika Creek	63.302	-144.573	63.739	64.008	-141.922	-140.109	Nearest living relative	5.4	9	Tortonian	3	7							Leopold and Liu, 1994	Grimaldi and Triplehorn, 2008		3	7
1120	Osojna (Kladovo)	44.58	22.63	44.481	44.425	22.093	21.817	Co-existence Approach	6	9	Tortonian	13.2	17.2	1.8	5.8	24.6	28.6	897	1297	Utescher et al., 2007			13.2	17.2	1.8	5.8	24.6	28.6	897	1297
1121	Crveni_Breg_Grocka	44.67	20.72	44.544	44.474	20.184	19.91	Co-existence Approach	6	9	Tortonian	12.6	16.6	-0.1	4.1	24.05	28.05	897	1297	Utescher et al., 2007			12.6	16.6	-0.1	4.1	24.05	28.05	897	1297
1122	Drenovets	43.7	22.983	43.587	43.553	22.373	22.205	Co-existence Approach	7.1	9	Tortonian	11.6	17.2					740	1308	Ivanov et al., 2002			11.6	17.2					740	1308
1123	Drenovets	43.7	22.983	43.587	43.553	22.373	22.205	Co-existence Approach	7.1	9	Tortonian	13.95	17.95					740	1308	Ivanov et al., 2002			13.95	17.95					740	1308
1124	Drenovets	43.7	22.983	43.587	43.553	22.373	22.205	Co-existence Approach	7.1	9	Tortonian	15.8	19.8					1047.5	1447.5	Ivanov et al., 2002			15.8	19.8					1047.5	1447.5
1125	Drenovets	43.7	22.983	43.587	43.553	22.373	22.205	Co-existence Approach	7.1	9	Tortonian	13.4	17.4					740	1308	Ivanov et al., 2002			13.4	17.4					740	1308
1126	Dubona	44.31	20.45	44.155	44.109	19.826	19.656	Co-existence Approach	7.1	9	Tortonian	12.9	16.9	2.25	6.25	24.05	28.05	979.5	1379.5	Utescher et al., 2007			12.9	16.9	2.25	6.25	24.05	28.05	979.5	1379.5
1127	Drenovets	43.7	22.983	43.587	43.553	22.373	22.205	Co-existence Approach	7.1	9	Tortonian	13.25	17.25					740	1308	Ivanov et al., 2002			13.25	17.25					740	1308
1128	Drenovets	43.7	22.983	43.587	43.553	22.373	22.205	Co-existence Approach	7.1	9	Tortonian	13.95	17.95					1047.5	1447.5	Ivanov et al., 2002			13.95	17.95					1047.5	1447.5
1129	Drenovets	43.7	22.983	43.587	43.553	22.373	22.205	Co-existence Approach	7.1	9	Tortonian	13.3	18.4					897	1308	Ivanov et al., 2002			13.3	18.4					897	1308
1130	Drenovets	43.7	22.983	43.587	43.553	22.373	22.205	Co-existence Approach	7.1	9	Tortonian	13.3	18.4					992	1392	Ivanov et al., 2002			13.3	18.4					992	1392
1131	Drenovets	43.7	22.983	43.587	43.553	22.373	22.205	Co-existence Approach	7.1	9	Tortonian	13.6	18.4					740	1308	Ivanov et al., 2002			13.6	18.4					740	1308
1132	Drenovets	43.7	22.983	43.587	43.553	22.373	22.205	Co-existence Approach	7.1	9	Tortonian	11.6	17.2					740	1308	Ivanov et al., 2002			11.6	17.2					740	1308
1133	Drenovets	43.7	22.983	43.587	43.553	22.373	22.205	Co-existence Approach	7.1	9	Tortonian	13.6	18.4					740	1308	Ivanov et al., 2002			13.6	18.4					740	1308
1134	Homer	59.667	-151.682	60.143	60.583	-149.489	-147.221	Nearest living relative	5	10	Tortonian	8.5	12.5			16.5	20.5			Reinink-Smith and Leopold, 2005			8.5	12.5			16.5	20.5
1135	Emetovka	46.733	30.533	46.746	46.745	29.811	29.513	Co-existence Approach	7.1	10	Tortonian	5.2	13.8	-5.9	4.1	17.1	24.3	389	900	Syabryaj et al., 2007			5.2	13.8	-5.9	4.1	17.1	24.3	389	900
1136	Emetovka	46.733	30.533	46.746	46.745	29.811	29.513	Co-existence Approach	7.1	10	Tortonian	4.9	17.4	-0.1	10.2	21.7	27	653	1053	Syabryaj et al., 2007			4.9	17.4	-0.1	10.2	21.7	27	653	1053
1137	Hambach Lignite Mine	50.917	6.417	50.634	50.321	5.836	5.236	Co-existence Approach	5.3	11	Tortonian	12.7	16.7	2.9	7.1	23.75	27.75	1044.5	1444.5	Utescher et al., 2000			12.7	16.7	2.9	7.1	23.75	27.75	1044.5	1444.5
1138	Zukunft Mine 7A	50.82	6.17	50.535	50.218	5.593	4.998	Co-existence Approach	5.3	11	Tortonian	13.4	17.4	5.25	9.25	23.8	27.8	1044.5	1444.5	Utescher et al., 2000			13.4	17.4	5.25	9.25	23.8	27.8	1044.5	1444.5
1139	Hambach Lignite Mine	50.917	6.417	50.634	50.321	5.836	5.236	Co-existence Approach	5.3	11	Tortonian	12.9	16.9	0.1	4.1	24.3	28.3	908	1308	Utescher et al., 2000			12.9	16.9	0.1	4.1	24.3	28.3	908	1308
1140	Hambach Lignite Mine	50.917	6.417	50.634	50.321	5.836	5.236	Co-existence Approach	5.3	11	Tortonian	13.1	17.1	5.25	9.25	23.75	27.75	1044.5	1444.5	Utescher et al., 2000			13.1	17.1	5.25	9.25	23.75	27.75	1044.5	1444.5
1141	Hambach Lignite Mine	50.917	6.417	50.634	50.321	5.836	5.236	Co-existence Approach	5.3	11	Tortonian	14	18	8.05	12.05	23.3	27.3	1054	1454	Utescher et al., 2000			14	18	8.05	12.05	23.3	27.3	1054	1454
1142	Frechen	50.89	6.75	50.611	50.302	6.168	5.566	Co-existence Approach	5.3	11	Tortonian	12.2	16.2	0.55	4.55	23.7	27.7	1079	1479	Utescher et al., 2000	Bruch et al., 2011		12.2	16.2	0.55	4.55	23.7	27.7	1079	1479
1143	Hambach Lignite Mine	50.917	6.417	50.634	50.321	5.836	5.236	Co-existence Approach	5.3	11	Tortonian	10.5	14.5	-1.3	4.1	22.05	26.05	809	1209	Utescher et al., 2000			10.5	14.5	-1.3	4.1	22.05	26.05	809	1209
1144	Opencast_Garzweiler	51.032	6.52	50.751	50.438	5.935	5.331	Co-existence Approach	5.3	11	Tortonian	11.55	15.55	-0.1	4.1	20.9	24.9	897	1297	Utescher et al., 2000			11.55	15.55	-0.1	4.1	20.9	24.9	897	1297
1145	Brandywine	36.7	-76.85	36.242	35.908	-74.774	-73.407	Co-existence Approach	6.5	11.2	Tortonian	12.75	16.75	0.1	7.8	21.75	25.75	851.5	1251.5	Stults and Axsmith, 2010			12.75	16.75	0.1	7.8	21.75	25.75	851.5	1251.5
1146	Luhe Coal Mine	25.167	101.367	25.48	25.825	101.654	101.993	Co-existence Approach	5.33	11.25	Tortonian	13.3	20.9	2.5	12.6	22.5	27.5	803.6	1254.7	Xu et al., 2008			13.3	20.9	2.5	12.6	22.5	27.5	803.6	1254.7
1147	Ejska	47.33	39.02	47.488	47.572	38.272	37.846	Co-existence Approach	7.1	11.5	Tortonian	11.5	17	-0.1	10.3	22.65	26.65	1212	1612	Bruch et al., 2011	Ananova, 1974		11.5	17	-0.1	10.3	22.65	26.65	1212	1612
1148	Makrilia	35	25.7	34.389	34.318	25.405	25.371	Co-existence Approach	7.1	11.5	Tortonian	14.8	18.8	6.65	10.65	24.55	28.55	788.5	1188.5	Bruch et al., 2006			14.8	18.8	6.65	10.65	24.55	28.55	788.5	1188.5
1149	Vösendorf	48.07	16.33	47.841	47.699	15.577	15.159	Co-existence Approach	7.1	11.5	Tortonian	12.85	16.85	1.95	5.95	24.1	28.1	866	1266	Bruch et al., 2006			12.85	16.85	1.95	5.95	24.1	28.1	866	1266
1150	Cholodnaja	48.023	38.066	48.165	48.238	37.289	36.847	Co-existence Approach	7.1	11.5	Tortonian	15.55	19.55	3.8	9.6	21.6	28.3	1096	1520	Bruch et al., 2011	Ananova, 1974		15.55	19.55	3.8	9.6	21.6	28.3	1096	1520	WMTmin_adjusted	WMTmax_adjusted	MAPmin_adjusted	MAPmax_adjusted	PalLatMin	PalLatMax	PalLonMin	PalLonMax
1151	Lohnsburg	48.15	13.42	47.813	47.718	12.529	12.302	Co-existence Approach	7.1	11.5	Tortonian	12.55	16.55	0.35	4.35	24.05	28.05	734	1134	Bruch et al., 2006			12.55	16.55	0.35	4.35	24.05	28.05	734	1134					39.107	39.181	45.861	45.734
1152	Velikaya Began 856 well	48.23	22.67	48.111	48.029	21.904	21.458	Co-existence Approach	7.1	11.5	Tortonian	13.2	17.2	3.4	7.4	22.25	26.25	951	1351	Bruch et al., 2011	Syabryaj et al., 2007		13.2	17.2	3.4	7.4	22.25	26.25	951	1351
1153	Hambach Lignite Mine	50.917	6.417	50.634	50.426	5.836	5.427	Co-existence Approach	7.1	11.5	Tortonian	13.1	17.1	4.3	8.3	23.75	27.75	1040.5	1440.5	Bruch et al., 2006			13.1	17.1	4.3	8.3	23.75	27.75	1040.5	1440.5
1154	Moravian Basin	48.7	17.05	48.483	48.347	16.27	15.836	Co-existence Approach	7.1	11.5	Tortonian	14.05	18.05	3.7	7.7	24.05	28.05	897	1297	Bruch et al., 2006			14.05	18.05	3.7	7.7	24.05	28.05	897	1297
1155	Wien E-F	48.8	16.65	48.576	48.437	15.868	15.433	Co-existence Approach	7.1	11.5	Tortonian	14.1	18.1	2.65	6.65	23.6	27.6	1093	1493	Bruch et al., 2006			14.1	18.1	2.65	6.65	23.6	27.6	1093	1493
1156	Visonta	47.75	20.02	47.583	47.477	19.264	18.842	Co-existence Approach	7.1	11.5	Tortonian	12.55	16.55	0	5.1	23.6	27.6	851.5	1251.5	Bruch et al., 2006			12.55	16.55	0	5.1	23.6	27.6	851.5	1251.5
1157	Triopetra	35.11	24.54	34.527	34.386	24.269	24.204	Co-existence Approach	7.1	11.5	Tortonian	15	19	5	9.4	24.25	28.25	547	947	Bruch et al., 2006			15	19	5	9.4	24.25	28.25	547	947
1158	Schneegattern	48.04	13.32	47.701	47.605	12.434	12.209	Co-existence Approach	7.1	11.5	Tortonian	12.75	16.75	0.1	4.5	24.75	28.75	967	1367	Bruch et al., 2006			12.75	16.75	0.1	4.5	24.75	28.75	967	1367
1159	Cocchati complex	45	38	45.142	45.19	37.332	37.074	Co-existence Approach	7.1	11.5	Tortonian			5.6	11.7	24.4	28.4			Utescher et al., 2010	Mai, 1995				5.6	11.7	24.4	28.4
1160	Oas Basin	47.5	23.25	47.391	47.356	22.509	22.306	Co-existence Approach	7.1	11.5	Tortonian	12.8	16.8	0.1	7	24.05	28.05	867	1356	Bruch et al., 2006			12.8	16.8	0.1	7	24.05	28.05	867	1356
1161	Nitra	48.19	18.05	47.994	47.867	17.301	16.868	Co-existence Approach	7.1	11.5	Tortonian	13.45	17.45	5.05	9.05	22.8	26.8	855.5	1255.5	Bruch et al., 2006			13.45	17.45	5.05	9.05	22.8	26.8	855.5	1255.5
1162	Neusiedl	47.92	15.83	47.682	47.536	15.085	14.672	Co-existence Approach	7.1	11.5	Tortonian	12.9	16.9	0.1	5.2	23.55	27.55	897	1355	Bruch et al., 2006			12.9	16.9	0.1	5.2	23.55	27.55	897	1355
1163	Rozsaszentmarton	47.75	19.75	47.578	47.47	18.995	18.574	Co-existence Approach	7.1	11.5	Tortonian	13.6	17.6	4	8	22.8	26.8	824	1224	Bruch et al., 2006			13.6	17.6	4	8	22.8	26.8	824	1224
1164	Sremska	45.1	19.45	44.928	44.816	18.804	18.431	Co-existence Approach	7.1	11.5	Tortonian			-0.5	9.6	25.25	29.25			Utescher et al., 2010					-0.5	9.6	25.25	29.25
1165	Sremska	45.1	19.45	44.928	44.816	18.804	18.431	Co-existence Approach	7.1	11.5	Tortonian	14	19					867	1384	Steppuhn et al., 2007			14	19					867	1384
1166	Ebersbrunn	48.53	15.88	48.267	48.231	15.031	14.923	Co-existence Approach	7.1	11.5	Tortonian	12.5	16.6					897	1356	Steppuhn et al., 2007			12.5	16.6					897	1356
1167	Velikaya Began 856 well	48.23	22.67	48.111	48.029	21.904	21.458	Co-existence Approach	7.1	11.5	Tortonian	12.7	17.7					950	1350	Syabryaj et al., 2007			12.7	17.7					950	1350
1168	Aubenham	48.3	12.4	48.012	47.83	11.675	11.259	Co-existence Approach	7.1	11.5	Tortonian	12.3	16.3	0.1	4.1	22.05	26.05	1034	1434	Bruch et al., 2006			12.3	16.3	0.1	4.1	22.05	26.05	1034	1434
1169	Bukkabrany	47.92	20.75	47.787	47.755	20.087	19.937	Co-existence Approach	7.1	11.5	Tortonian	13.5	17.5	2.35	6.35	24.9	28.9	897	1355	Bruch et al., 2006	Bruch et al., 2006		13.5	17.5	2.35	6.35	24.9	28.9	897	1355
1170	Bulgaria C1	43.87	23.51	43.763	43.717	22.88	22.64	Co-existence Approach	7.1	11.5	Tortonian	14.4	18.4	3.8	7.8	24	28	823	1308	Bruch et al., 2006			14.4	18.4	3.8	7.8	24	28	823	1308
1171	Dubona	44.31	20.45	44.151	44.12	19.813	19.696	Co-existence Approach	7.1	11.5	Tortonian	12.9	16.9	2.25	6.25	24.6	28.6	979.5	1379.5	Bruch et al., 2006	Pantic, 1956		12.9	16.9	2.25	6.25	24.6	28.6	979.5	1379.5
1172	Neuhaus	46.93	16.08	46.702	46.636	15.385	15.195	Co-existence Approach	7.1	11.5	Tortonian	13.7	17.7	0.6	5.8	23.85	27.85	1093	1493	Bruch et al., 2006			13.7	17.7	0.6	5.8	23.85	27.85	1093	1493
1173	Leonberg	48.25	12.9	47.86	47.804	11.904	11.782	Co-existence Approach	7.1	11.5	Tortonian	14	18	2.9	7.6	21.95	25.95	735	1475	Bruch et al., 2006			14	18	2.9	7.6	21.95	25.95	735	1475
1174	Durinci	44.52	20.75	44.366	44.269	20.105	19.748	Co-existence Approach	7.1	11.5	Tortonian	14.05	18.05	1.3	5.3	24.05	28.05	920	1320	Bruch et al., 2006			14.05	18.05	1.3	5.3	24.05	28.05	920	1320
1175	Frechen	50.89	6.75	50.406	50.271	5.758	5.513	Co-existence Approach	7.1	11.5	Tortonian	12.75	16.75	0.55	4.55	24.25	28.25	1079	1479	Bruch et al., 2006			12.75	16.75	0.55	4.55	24.25	28.25	1079	1479
1176	Grossenreith	48.16	13.36	47.822	47.726	12.469	12.242	Co-existence Approach	7.1	11.5	Tortonian	12.7	16.7	0.35	4.35	24.35	28.35	719	1119	Bruch et al., 2006			12.7	16.7	0.35	4.35	24.35	28.35	719	1119
1177	Hidas 53	46.166	18.513	45.974	45.854	17.82	17.435	Co-existence Approach	7.1	11.5	Tortonian	11.6	18.4	4.6	8.6	24.2	28.2	1042.5	1442.5	Bruch et al., 2006	Nagy, 1967		11.6	18.4	4.6	8.6	24.2	28.2	1042.5	1442.5
1178	Hoktemberyan 5	40.18	44.15	40.516	40.604	43.456	43.292	Co-existence Approach	7.1	11.5	Tortonian	15	19	4.35	8.35	24.75	28.75	904.5	1304.5	Bruch et al., 2006			15	19	4.35	8.35	24.75	28.75	904.5	1304.5
1179	Klettwitz 12	51.55	13.9	51.355	51.113	13.26	12.534	Co-existence Approach	7.1	11.5	Tortonian	14	18	3.45	7.45	23.7	27.7	967	1367	Bruch et al., 2006			14	18	3.45	7.45	23.7	27.7	967	1367
1180	Laaerberg	48.17	16.27	47.94	47.879	15.514	15.328	Co-existence Approach	7.1	11.5	Tortonian	12.5	16.5	-0.5	5.1	24	28	842	1242	Bruch et al., 2006			12.5	16.5	-0.5	5.1	24	28	842	1242
1181	Delureni	46.97	22.58	46.847	46.766	21.845	21.434	Co-existence Approach	7.1	11.5	Tortonian	14.85	18.85	3.4	7.4	25.2	29.2	1039	1439	Bruch et al., 2006			14.85	18.85	3.4	7.4	25.2	29.2	1039	1439
1182	Nekkeiveem H3658	69	165	70.023	70.62	167.089	168.587	Co-existence Approach	5.3	11.6	Tortonian			-12.9	7.8	17.5	25.6			Utescher et al., 2010					-12.9	7.8	17.5	25.6
1183	Magadan H2811	59	150	59.843	60.33	151.174	151.892	Co-existence Approach	5.3	11.6	Tortonian			-9.5	6.4	17.8	25.6			Utescher et al., 2010					-9.5	6.4	17.8	25.6
1184	Xianfeng	29.75	108.92	30.321	30.982	109.027	109.163	CLAMP (leaf physiognomy)	5.3	11.6	Tortonian	12.7	18.7					1226	1678	Xing et al., 2010			12.7	18.7					1226	1678
1185	Arjuzanx	44.8	-0.6	44.303	44.008	-1.128	-1.411	Co-existence Approach	5.3	11.6	Tortonian			6.2	13.3	24.3	28.3			Utescher et al., 2010					6.2	13.3	24.3	28.3
1186	Hengduan Mountains	23.47	100.7	23.569	23.626	101.631	102.218	Co-existence Approach	5.3	11.6	Tortonian			3.8	12.5	24.3	28.3			Utescher et al., 2010					3.8	12.5	24.3	28.3
1187	Kaiyuan	23.5	103.2	24.01	24.316	103.682	104.001	Co-existence Approach	5.3	11.6	Tortonian	12.6	16.6					807	1207	Steppuhn et al., 2007			12.6	16.6					807	1207
1188	Sachalin	50.9	142.17	51.929	52.961	142.156	143.615	Co-existence Approach	5.3	11.6	Tortonian	11.55	15.55					829.5	1229.5	Steppuhn et al., 2007			11.55	15.55					829.5	1229.5
1189	Qinghai-Xizang	29.65	91.1	27.547	26.359	90.863	90.617	Co-existence Approach	5.33	11.6	Tortonian			3.8	14.8	21.7	28.1			Utescher et al., 2010					3.8	14.8	21.7	28.1
1190	Xianfeng	29.75	108.92	30.321	30.982	109.027	109.163	Leaf Margin Analysis	5.33	11.6	Tortonian	14.2	20.2							Xing et al., 2010			14.2	20.2
1191	Yanran H3690	68	161	68.726	69.138	162.991	164.215	Co-existence Approach	5.33	11.6	Tortonian			-12.9	7.8	17.5	25.6			Utescher et al., 2010					-12.9	7.8	17.5	25.6
1192	Yana H4967	59	149	59.852	60.344	150.148	150.851	Co-existence Approach	5.33	11.6	Tortonian			-8.1	6.4	15.9	25.6			Utescher et al., 2010					-8.1	6.4	15.9	25.6
1193	Weihe	34.54	109.08	35.386	35.861	108.226	107.942	Co-existence Approach	5.33	11.6	Tortonian			3.8	13.3	22.8	28.1			Utescher et al., 2010					3.8	13.3	22.8	28.1
1194	Vaugines	43.78	5.42	43.375	43.133	4.875	4.58	Co-existence Approach	5.33	11.6	Tortonian			5	13.6	24.75	28.75			Utescher et al., 2010					5	13.6	24.75	28.75
1195	Temmir-haj H4954	71	132	71.96	72.517	132.976	133.589	Co-existence Approach	5.33	11.6	Tortonian			-2.85	1.15	20.7	24.7			Utescher et al., 2010					-2.85	1.15	20.7	24.7
1196	Tarragona_E2_1	40.84	1.15	40.37	40.094	0.717	0.459	Co-existence Approach	5.33	11.6	Tortonian			8.85	12.85	25.6	29.6			Utescher et al., 2010					8.85	12.85	25.6	29.6
1197	Omoloj H4954	70	133	70.901	71.477	133.467	133.979	Co-existence Approach	5.33	11.6	Tortonian			-3.8	6.4	21.65	25.65			Utescher et al., 2010					-3.8	6.4	21.65	25.65
1198	Resident H3459	59	143	59.9	60.421	143.992	144.6	Co-existence Approach	5.33	11.6	Tortonian			-12.9	6.4	18.9	25.6			Utescher et al., 2010					-12.9	6.4	18.9	25.6
1199	Povoa 3	39.2	-8.9	38.587	38.224	-9.213	-9.399	Co-existence Approach	5.33	11.6	Tortonian			7.15	11.15	22.85	26.85			Utescher et al., 2010					7.15	11.15	22.85	26.85
1200	Penafiel	41.4	-4.2	40.852	40.528	-4.605	-4.847	Co-existence Approach	5.33	11.6	Tortonian			6.65	10.65	22.35	26.35			Utescher et al., 2010					6.65	10.65	22.35	26.35
1201	Osinov H368	64	175	64.543	64.847	177.017	178.237	Co-existence Approach	5.33	11.6	Tortonian			-2.7	7.8	19.3	25.6			Utescher et al., 2010					-2.7	7.8	19.3	25.6
1202	East China Sea	30.72	122.45	32.109	32.921	122.671	122.799	Co-existence Approach	5.33	11.6	Tortonian			3.8	12.5	23.6	28.1			Utescher et al., 2010					3.8	12.5	23.6	28.1
1203	Dunhuang	40	94.78	40.351	40.747	94.584	94.358	Co-existence Approach	5.33	11.6	Tortonian			6.6	13.6	23	28.1			Utescher et al., 2010					6.6	13.6	23	28.1
1204	Chaidamu	38.23	92.05	38.093	38.018	91.058	90.459	Co-existence Approach	5.33	11.6	Tortonian			3.2	7.2	22.8	28.2			Utescher et al., 2010					3.2	7.2	22.8	28.2
1205	Soblay	45.1	5.5	44.611	44.553	4.796	4.714	Co-existence Approach	5.33	11.6	Tortonian			5	13.3	23.4	27.4			Utescher et al., 2010					5	13.3	23.4	27.4
1206	Hog Creek 635	44.29	-117.092	44.401	44.404	-114.722	-112.409	Modern equivalent approach	6	11.8	Tortonian	12	16					435	835	Dorf, 1938			12	16					435	835
1207	Kuqa	41.83	82.94	42.055	42.119	82.555	82.441	Co-existence Approach	5.3	15.97	Tortonian	15.05	19.05	3.8	12.5	23.6	28.1	652	1355	Liu et al., 2011			15.05	19.05	3.8	12.5	23.6	28.1	652	1355

## Sheet: Dating Uncertainties
RecordID	Site_Name	AgeMin	AgeMax		4 Ma													5.3 Ma																			7.25 Ma
					4	4.1	4.2	4.3	4.4	4.5	4.6	4.7	4.8	4.9	5	5.1	5.2	5.3	5.4	5.5	5.6	5.7	5.8	5.9	6	6.1	6.2	6.3	6.4	6.5	6.6	6.7	6.8	6.9	7	7.1	7.2	7.3	7.4	7.5	7.6	7.7	7.8	7.9	8	8.1	8.2	8.3	8.4
1	Ampflwang	8.7	9.7		FALSE	FALSE	FALSE	FALSE	FALSE	FALSE	FALSE	FALSE	FALSE	FALSE	FALSE	FALSE	FALSE	FALSE	FALSE	FALSE	FALSE	FALSE	FALSE	FALSE	FALSE	FALSE	FALSE	FALSE	FALSE	FALSE	FALSE	FALSE	FALSE	FALSE	FALSE	FALSE	FALSE	FALSE	FALSE	FALSE	FALSE	FALSE	FALSE	FALSE	FALSE	FALSE	FALSE	FALSE	FALSE
2	Aubenham	7.1	11.5		FALSE	FALSE	FALSE	FALSE	FALSE	FALSE	FALSE	FALSE	FALSE	FALSE	FALSE	FALSE	FALSE	FALSE	FALSE	FALSE	FALSE	FALSE	FALSE	FALSE	FALSE	FALSE	FALSE	FALSE	FALSE	FALSE	FALSE	FALSE	FALSE	FALSE	FALSE	1	1	1	1	1	1	1	1	1	1	1	1	1	1
3	Bukkabrany	7.1	11.5		FALSE	FALSE	FALSE	FALSE	FALSE	FALSE	FALSE	FALSE	FALSE	FALSE	FALSE	FALSE	FALSE	FALSE	FALSE	FALSE	FALSE	FALSE	FALSE	FALSE	FALSE	FALSE	FALSE	FALSE	FALSE	FALSE	FALSE	FALSE	FALSE	FALSE	FALSE	1	1	1	1	1	1	1	1	1	1	1	1	1	1
4	Bulgaria C1	7.1	11.5		FALSE	FALSE	FALSE	FALSE	FALSE	FALSE	FALSE	FALSE	FALSE	FALSE	FALSE	FALSE	FALSE	FALSE	FALSE	FALSE	FALSE	FALSE	FALSE	FALSE	FALSE	FALSE	FALSE	FALSE	FALSE	FALSE	FALSE	FALSE	FALSE	FALSE	FALSE	1	1	1	1	1	1	1	1	1	1	1	1	1	1
5	Delureni	7.1	11.5		FALSE	FALSE	FALSE	FALSE	FALSE	FALSE	FALSE	FALSE	FALSE	FALSE	FALSE	FALSE	FALSE	FALSE	FALSE	FALSE	FALSE	FALSE	FALSE	FALSE	FALSE	FALSE	FALSE	FALSE	FALSE	FALSE	FALSE	FALSE	FALSE	FALSE	FALSE	1	1	1	1	1	1	1	1	1	1	1	1	1	1
6	Dubona	7.1	11.5		FALSE	FALSE	FALSE	FALSE	FALSE	FALSE	FALSE	FALSE	FALSE	FALSE	FALSE	FALSE	FALSE	FALSE	FALSE	FALSE	FALSE	FALSE	FALSE	FALSE	FALSE	FALSE	FALSE	FALSE	FALSE	FALSE	FALSE	FALSE	FALSE	FALSE	FALSE	1	1	1	1	1	1	1	1	1	1	1	1	1	1
7	Durinci	7.1	11.5		FALSE	FALSE	FALSE	FALSE	FALSE	FALSE	FALSE	FALSE	FALSE	FALSE	FALSE	FALSE	FALSE	FALSE	FALSE	FALSE	FALSE	FALSE	FALSE	FALSE	FALSE	FALSE	FALSE	FALSE	FALSE	FALSE	FALSE	FALSE	FALSE	FALSE	FALSE	1	1	1	1	1	1	1	1	1	1	1	1	1	1
8	Frechen	7.1	11.5		FALSE	FALSE	FALSE	FALSE	FALSE	FALSE	FALSE	FALSE	FALSE	FALSE	FALSE	FALSE	FALSE	FALSE	FALSE	FALSE	FALSE	FALSE	FALSE	FALSE	FALSE	FALSE	FALSE	FALSE	FALSE	FALSE	FALSE	FALSE	FALSE	FALSE	FALSE	1	1	1	1	1	1	1	1	1	1	1	1	1	1
9	Grossenreith	7.1	11.5		FALSE	FALSE	FALSE	FALSE	FALSE	FALSE	FALSE	FALSE	FALSE	FALSE	FALSE	FALSE	FALSE	FALSE	FALSE	FALSE	FALSE	FALSE	FALSE	FALSE	FALSE	FALSE	FALSE	FALSE	FALSE	FALSE	FALSE	FALSE	FALSE	FALSE	FALSE	1	1	1	1	1	1	1	1	1	1	1	1	1	1
10	Hambach Lignite Mine	7.3	9		FALSE	FALSE	FALSE	FALSE	FALSE	FALSE	FALSE	FALSE	FALSE	FALSE	FALSE	FALSE	FALSE	FALSE	FALSE	FALSE	FALSE	FALSE	FALSE	FALSE	FALSE	FALSE	FALSE	FALSE	FALSE	FALSE	FALSE	FALSE	FALSE	FALSE	FALSE	FALSE	FALSE	1	1	1	1	1	1	1	1	1	1	1	1
11	Hidas 53	7.1	11.5		FALSE	FALSE	FALSE	FALSE	FALSE	FALSE	FALSE	FALSE	FALSE	FALSE	FALSE	FALSE	FALSE	FALSE	FALSE	FALSE	FALSE	FALSE	FALSE	FALSE	FALSE	FALSE	FALSE	FALSE	FALSE	FALSE	FALSE	FALSE	FALSE	FALSE	FALSE	1	1	1	1	1	1	1	1	1	1	1	1	1	1
12	Hoktemberyan 5	7.1	11.5		FALSE	FALSE	FALSE	FALSE	FALSE	FALSE	FALSE	FALSE	FALSE	FALSE	FALSE	FALSE	FALSE	FALSE	FALSE	FALSE	FALSE	FALSE	FALSE	FALSE	FALSE	FALSE	FALSE	FALSE	FALSE	FALSE	FALSE	FALSE	FALSE	FALSE	FALSE	1	1	1	1	1	1	1	1	1	1	1	1	1	1
13	Klettwitz 12	7.1	11.5		FALSE	FALSE	FALSE	FALSE	FALSE	FALSE	FALSE	FALSE	FALSE	FALSE	FALSE	FALSE	FALSE	FALSE	FALSE	FALSE	FALSE	FALSE	FALSE	FALSE	FALSE	FALSE	FALSE	FALSE	FALSE	FALSE	FALSE	FALSE	FALSE	FALSE	FALSE	1	1	1	1	1	1	1	1	1	1	1	1	1	1
14	Laaerberg	7.1	11.5		FALSE	FALSE	FALSE	FALSE	FALSE	FALSE	FALSE	FALSE	FALSE	FALSE	FALSE	FALSE	FALSE	FALSE	FALSE	FALSE	FALSE	FALSE	FALSE	FALSE	FALSE	FALSE	FALSE	FALSE	FALSE	FALSE	FALSE	FALSE	FALSE	FALSE	FALSE	1	1	1	1	1	1	1	1	1	1	1	1	1	1
15	Leonberg	7.1	11.5		FALSE	FALSE	FALSE	FALSE	FALSE	FALSE	FALSE	FALSE	FALSE	FALSE	FALSE	FALSE	FALSE	FALSE	FALSE	FALSE	FALSE	FALSE	FALSE	FALSE	FALSE	FALSE	FALSE	FALSE	FALSE	FALSE	FALSE	FALSE	FALSE	FALSE	FALSE	1	1	1	1	1	1	1	1	1	1	1	1	1	1
16	Lohnsburg	7.1	11.5		FALSE	FALSE	FALSE	FALSE	FALSE	FALSE	FALSE	FALSE	FALSE	FALSE	FALSE	FALSE	FALSE	FALSE	FALSE	FALSE	FALSE	FALSE	FALSE	FALSE	FALSE	FALSE	FALSE	FALSE	FALSE	FALSE	FALSE	FALSE	FALSE	FALSE	FALSE	1	1	1	1	1	1	1	1	1	1	1	1	1	1
17	Makrilia	7.1	11.5		FALSE	FALSE	FALSE	FALSE	FALSE	FALSE	FALSE	FALSE	FALSE	FALSE	FALSE	FALSE	FALSE	FALSE	FALSE	FALSE	FALSE	FALSE	FALSE	FALSE	FALSE	FALSE	FALSE	FALSE	FALSE	FALSE	FALSE	FALSE	FALSE	FALSE	FALSE	1	1	1	1	1	1	1	1	1	1	1	1	1	1
18	Moravian Basin	7.1	11.5		FALSE	FALSE	FALSE	FALSE	FALSE	FALSE	FALSE	FALSE	FALSE	FALSE	FALSE	FALSE	FALSE	FALSE	FALSE	FALSE	FALSE	FALSE	FALSE	FALSE	FALSE	FALSE	FALSE	FALSE	FALSE	FALSE	FALSE	FALSE	FALSE	FALSE	FALSE	1	1	1	1	1	1	1	1	1	1	1	1	1	1
19	Neuhaus	7.1	11.5		FALSE	FALSE	FALSE	FALSE	FALSE	FALSE	FALSE	FALSE	FALSE	FALSE	FALSE	FALSE	FALSE	FALSE	FALSE	FALSE	FALSE	FALSE	FALSE	FALSE	FALSE	FALSE	FALSE	FALSE	FALSE	FALSE	FALSE	FALSE	FALSE	FALSE	FALSE	1	1	1	1	1	1	1	1	1	1	1	1	1	1
20	Neusiedl	7.1	11.5		FALSE	FALSE	FALSE	FALSE	FALSE	FALSE	FALSE	FALSE	FALSE	FALSE	FALSE	FALSE	FALSE	FALSE	FALSE	FALSE	FALSE	FALSE	FALSE	FALSE	FALSE	FALSE	FALSE	FALSE	FALSE	FALSE	FALSE	FALSE	FALSE	FALSE	FALSE	1	1	1	1	1	1	1	1	1	1	1	1	1	1
21	Nitra	7.1	11.5		FALSE	FALSE	FALSE	FALSE	FALSE	FALSE	FALSE	FALSE	FALSE	FALSE	FALSE	FALSE	FALSE	FALSE	FALSE	FALSE	FALSE	FALSE	FALSE	FALSE	FALSE	FALSE	FALSE	FALSE	FALSE	FALSE	FALSE	FALSE	FALSE	FALSE	FALSE	1	1	1	1	1	1	1	1	1	1	1	1	1	1
22	Oas Basin	7.1	11.5		FALSE	FALSE	FALSE	FALSE	FALSE	FALSE	FALSE	FALSE	FALSE	FALSE	FALSE	FALSE	FALSE	FALSE	FALSE	FALSE	FALSE	FALSE	FALSE	FALSE	FALSE	FALSE	FALSE	FALSE	FALSE	FALSE	FALSE	FALSE	FALSE	FALSE	FALSE	1	1	1	1	1	1	1	1	1	1	1	1	1	1
23	Rozsaszentmarton	7.1	11.5		FALSE	FALSE	FALSE	FALSE	FALSE	FALSE	FALSE	FALSE	FALSE	FALSE	FALSE	FALSE	FALSE	FALSE	FALSE	FALSE	FALSE	FALSE	FALSE	FALSE	FALSE	FALSE	FALSE	FALSE	FALSE	FALSE	FALSE	FALSE	FALSE	FALSE	FALSE	1	1	1	1	1	1	1	1	1	1	1	1	1	1
24	Schneegattern	7.1	11.5		FALSE	FALSE	FALSE	FALSE	FALSE	FALSE	FALSE	FALSE	FALSE	FALSE	FALSE	FALSE	FALSE	FALSE	FALSE	FALSE	FALSE	FALSE	FALSE	FALSE	FALSE	FALSE	FALSE	FALSE	FALSE	FALSE	FALSE	FALSE	FALSE	FALSE	FALSE	1	1	1	1	1	1	1	1	1	1	1	1	1	1
25	Triopetra	7.1	11.5		FALSE	FALSE	FALSE	FALSE	FALSE	FALSE	FALSE	FALSE	FALSE	FALSE	FALSE	FALSE	FALSE	FALSE	FALSE	FALSE	FALSE	FALSE	FALSE	FALSE	FALSE	FALSE	FALSE	FALSE	FALSE	FALSE	FALSE	FALSE	FALSE	FALSE	FALSE	1	1	1	1	1	1	1	1	1	1	1	1	1	1
26	Visonta	7.1	11.5		FALSE	FALSE	FALSE	FALSE	FALSE	FALSE	FALSE	FALSE	FALSE	FALSE	FALSE	FALSE	FALSE	FALSE	FALSE	FALSE	FALSE	FALSE	FALSE	FALSE	FALSE	FALSE	FALSE	FALSE	FALSE	FALSE	FALSE	FALSE	FALSE	FALSE	FALSE	1	1	1	1	1	1	1	1	1	1	1	1	1	1
27	Vösendorf	8.7	11.7		FALSE	FALSE	FALSE	FALSE	FALSE	FALSE	FALSE	FALSE	FALSE	FALSE	FALSE	FALSE	FALSE	FALSE	FALSE	FALSE	FALSE	FALSE	FALSE	FALSE	FALSE	FALSE	FALSE	FALSE	FALSE	FALSE	FALSE	FALSE	FALSE	FALSE	FALSE	FALSE	FALSE	FALSE	FALSE	FALSE	FALSE	FALSE	FALSE	FALSE	FALSE	FALSE	FALSE	FALSE	FALSE
28	Wien E-F	7.1	11.5		FALSE	FALSE	FALSE	FALSE	FALSE	FALSE	FALSE	FALSE	FALSE	FALSE	FALSE	FALSE	FALSE	FALSE	FALSE	FALSE	FALSE	FALSE	FALSE	FALSE	FALSE	FALSE	FALSE	FALSE	FALSE	FALSE	FALSE	FALSE	FALSE	FALSE	FALSE	1	1	1	1	1	1	1	1	1	1	1	1	1	1
29	Eppelsheim	9.7	11.1		FALSE	FALSE	FALSE	FALSE	FALSE	FALSE	FALSE	FALSE	FALSE	FALSE	FALSE	FALSE	FALSE	FALSE	FALSE	FALSE	FALSE	FALSE	FALSE	FALSE	FALSE	FALSE	FALSE	FALSE	FALSE	FALSE	FALSE	FALSE	FALSE	FALSE	FALSE	FALSE	FALSE	FALSE	FALSE	FALSE	FALSE	FALSE	FALSE	FALSE	FALSE	FALSE	FALSE	FALSE	FALSE
30	Can Llobateres I	9.7	11.1		FALSE	FALSE	FALSE	FALSE	FALSE	FALSE	FALSE	FALSE	FALSE	FALSE	FALSE	FALSE	FALSE	FALSE	FALSE	FALSE	FALSE	FALSE	FALSE	FALSE	FALSE	FALSE	FALSE	FALSE	FALSE	FALSE	FALSE	FALSE	FALSE	FALSE	FALSE	FALSE	FALSE	FALSE	FALSE	FALSE	FALSE	FALSE	FALSE	FALSE	FALSE	FALSE	FALSE	FALSE	FALSE
31	Can Ponsic	9.7	11.1		FALSE	FALSE	FALSE	FALSE	FALSE	FALSE	FALSE	FALSE	FALSE	FALSE	FALSE	FALSE	FALSE	FALSE	FALSE	FALSE	FALSE	FALSE	FALSE	FALSE	FALSE	FALSE	FALSE	FALSE	FALSE	FALSE	FALSE	FALSE	FALSE	FALSE	FALSE	FALSE	FALSE	FALSE	FALSE	FALSE	FALSE	FALSE	FALSE	FALSE	FALSE	FALSE	FALSE	FALSE	FALSE
32	Los Valles de Fuentidueña	9.7	11.1		FALSE	FALSE	FALSE	FALSE	FALSE	FALSE	FALSE	FALSE	FALSE	FALSE	FALSE	FALSE	FALSE	FALSE	FALSE	FALSE	FALSE	FALSE	FALSE	FALSE	FALSE	FALSE	FALSE	FALSE	FALSE	FALSE	FALSE	FALSE	FALSE	FALSE	FALSE	FALSE	FALSE	FALSE	FALSE	FALSE	FALSE	FALSE	FALSE	FALSE	FALSE	FALSE	FALSE	FALSE	FALSE
33	Samos	7.3	7.8		FALSE	FALSE	FALSE	FALSE	FALSE	FALSE	FALSE	FALSE	FALSE	FALSE	FALSE	FALSE	FALSE	FALSE	FALSE	FALSE	FALSE	FALSE	FALSE	FALSE	FALSE	FALSE	FALSE	FALSE	FALSE	FALSE	FALSE	FALSE	FALSE	FALSE	FALSE	FALSE	FALSE	1	1	1	1	1	1	FALSE	FALSE	FALSE	FALSE	FALSE	FALSE
34	Maragheh	7.3	7.8		FALSE	FALSE	FALSE	FALSE	FALSE	FALSE	FALSE	FALSE	FALSE	FALSE	FALSE	FALSE	FALSE	FALSE	FALSE	FALSE	FALSE	FALSE	FALSE	FALSE	FALSE	FALSE	FALSE	FALSE	FALSE	FALSE	FALSE	FALSE	FALSE	FALSE	FALSE	FALSE	FALSE	1	1	1	1	1	1	FALSE	FALSE	FALSE	FALSE	FALSE	FALSE
35	Pikermi	7.3	7.8		FALSE	FALSE	FALSE	FALSE	FALSE	FALSE	FALSE	FALSE	FALSE	FALSE	FALSE	FALSE	FALSE	FALSE	FALSE	FALSE	FALSE	FALSE	FALSE	FALSE	FALSE	FALSE	FALSE	FALSE	FALSE	FALSE	FALSE	FALSE	FALSE	FALSE	FALSE	FALSE	FALSE	1	1	1	1	1	1	FALSE	FALSE	FALSE	FALSE	FALSE	FALSE
36	Can Missert	9.7	11.1		FALSE	FALSE	FALSE	FALSE	FALSE	FALSE	FALSE	FALSE	FALSE	FALSE	FALSE	FALSE	FALSE	FALSE	FALSE	FALSE	FALSE	FALSE	FALSE	FALSE	FALSE	FALSE	FALSE	FALSE	FALSE	FALSE	FALSE	FALSE	FALSE	FALSE	FALSE	FALSE	FALSE	FALSE	FALSE	FALSE	FALSE	FALSE	FALSE	FALSE	FALSE	FALSE	FALSE	FALSE	FALSE
37	Santiga	9.7	11.1		FALSE	FALSE	FALSE	FALSE	FALSE	FALSE	FALSE	FALSE	FALSE	FALSE	FALSE	FALSE	FALSE	FALSE	FALSE	FALSE	FALSE	FALSE	FALSE	FALSE	FALSE	FALSE	FALSE	FALSE	FALSE	FALSE	FALSE	FALSE	FALSE	FALSE	FALSE	FALSE	FALSE	FALSE	FALSE	FALSE	FALSE	FALSE	FALSE	FALSE	FALSE	FALSE	FALSE	FALSE	FALSE
38	Can Purull	8.7	9.7		FALSE	FALSE	FALSE	FALSE	FALSE	FALSE	FALSE	FALSE	FALSE	FALSE	FALSE	FALSE	FALSE	FALSE	FALSE	FALSE	FALSE	FALSE	FALSE	FALSE	FALSE	FALSE	FALSE	FALSE	FALSE	FALSE	FALSE	FALSE	FALSE	FALSE	FALSE	FALSE	FALSE	FALSE	FALSE	FALSE	FALSE	FALSE	FALSE	FALSE	FALSE	FALSE	FALSE	FALSE	FALSE
39	Masa del Barbo	8.7	9.7		FALSE	FALSE	FALSE	FALSE	FALSE	FALSE	FALSE	FALSE	FALSE	FALSE	FALSE	FALSE	FALSE	FALSE	FALSE	FALSE	FALSE	FALSE	FALSE	FALSE	FALSE	FALSE	FALSE	FALSE	FALSE	FALSE	FALSE	FALSE	FALSE	FALSE	FALSE	FALSE	FALSE	FALSE	FALSE	FALSE	FALSE	FALSE	FALSE	FALSE	FALSE	FALSE	FALSE	FALSE	FALSE
40	Piera	7.8	8.7		FALSE	FALSE	FALSE	FALSE	FALSE	FALSE	FALSE	FALSE	FALSE	FALSE	FALSE	FALSE	FALSE	FALSE	FALSE	FALSE	FALSE	FALSE	FALSE	FALSE	FALSE	FALSE	FALSE	FALSE	FALSE	FALSE	FALSE	FALSE	FALSE	FALSE	FALSE	FALSE	FALSE	FALSE	FALSE	FALSE	FALSE	FALSE	1	1	1	1	1	1	1
41	La Cantera	8.7	9.7		FALSE	FALSE	FALSE	FALSE	FALSE	FALSE	FALSE	FALSE	FALSE	FALSE	FALSE	FALSE	FALSE	FALSE	FALSE	FALSE	FALSE	FALSE	FALSE	FALSE	FALSE	FALSE	FALSE	FALSE	FALSE	FALSE	FALSE	FALSE	FALSE	FALSE	FALSE	FALSE	FALSE	FALSE	FALSE	FALSE	FALSE	FALSE	FALSE	FALSE	FALSE	FALSE	FALSE	FALSE	FALSE
42	Crevillente 2	7.8	8.7		FALSE	FALSE	FALSE	FALSE	FALSE	FALSE	FALSE	FALSE	FALSE	FALSE	FALSE	FALSE	FALSE	FALSE	FALSE	FALSE	FALSE	FALSE	FALSE	FALSE	FALSE	FALSE	FALSE	FALSE	FALSE	FALSE	FALSE	FALSE	FALSE	FALSE	FALSE	FALSE	FALSE	FALSE	FALSE	FALSE	FALSE	FALSE	1	1	1	1	1	1	1
43	Los Mansuetos	7.3	7.8		FALSE	FALSE	FALSE	FALSE	FALSE	FALSE	FALSE	FALSE	FALSE	FALSE	FALSE	FALSE	FALSE	FALSE	FALSE	FALSE	FALSE	FALSE	FALSE	FALSE	FALSE	FALSE	FALSE	FALSE	FALSE	FALSE	FALSE	FALSE	FALSE	FALSE	FALSE	FALSE	FALSE	1	1	1	1	1	1	FALSE	FALSE	FALSE	FALSE	FALSE	FALSE
44	Concud	7.3	7.8		FALSE	FALSE	FALSE	FALSE	FALSE	FALSE	FALSE	FALSE	FALSE	FALSE	FALSE	FALSE	FALSE	FALSE	FALSE	FALSE	FALSE	FALSE	FALSE	FALSE	FALSE	FALSE	FALSE	FALSE	FALSE	FALSE	FALSE	FALSE	FALSE	FALSE	FALSE	FALSE	FALSE	1	1	1	1	1	1	FALSE	FALSE	FALSE	FALSE	FALSE	FALSE
45	Casa del Acero	7.3	7.8		FALSE	FALSE	FALSE	FALSE	FALSE	FALSE	FALSE	FALSE	FALSE	FALSE	FALSE	FALSE	FALSE	FALSE	FALSE	FALSE	FALSE	FALSE	FALSE	FALSE	FALSE	FALSE	FALSE	FALSE	FALSE	FALSE	FALSE	FALSE	FALSE	FALSE	FALSE	FALSE	FALSE	1	1	1	1	1	1	FALSE	FALSE	FALSE	FALSE	FALSE	FALSE
46	Ballestar	9.7	11.1		FALSE	FALSE	FALSE	FALSE	FALSE	FALSE	FALSE	FALSE	FALSE	FALSE	FALSE	FALSE	FALSE	FALSE	FALSE	FALSE	FALSE	FALSE	FALSE	FALSE	FALSE	FALSE	FALSE	FALSE	FALSE	FALSE	FALSE	FALSE	FALSE	FALSE	FALSE	FALSE	FALSE	FALSE	FALSE	FALSE	FALSE	FALSE	FALSE	FALSE	FALSE	FALSE	FALSE	FALSE	FALSE
47	Venta del Moro	4.9	7.3		FALSE	FALSE	FALSE	FALSE	FALSE	FALSE	FALSE	FALSE	FALSE	2	2	2	2	1	1	1	1	1	1	1	1	1	1	1	1	1	1	1	1	1	1	1	1	1	FALSE	FALSE	FALSE	FALSE	FALSE	FALSE	FALSE	FALSE	FALSE	FALSE	FALSE
48	Librilla	4.9	7.3		FALSE	FALSE	FALSE	FALSE	FALSE	FALSE	FALSE	FALSE	FALSE	2	2	2	2	1	1	1	1	1	1	1	1	1	1	1	1	1	1	1	1	1	1	1	1	1	FALSE	FALSE	FALSE	FALSE	FALSE	FALSE	FALSE	FALSE	FALSE	FALSE	FALSE
49	La Alberca	4.9	7.3		FALSE	FALSE	FALSE	FALSE	FALSE	FALSE	FALSE	FALSE	FALSE	2	2	2	2	1	1	1	1	1	1	1	1	1	1	1	1	1	1	1	1	1	1	1	1	1	FALSE	FALSE	FALSE	FALSE	FALSE	FALSE	FALSE	FALSE	FALSE	FALSE	FALSE
50	El Arquillo 1	4.9	7.3		FALSE	FALSE	FALSE	FALSE	FALSE	FALSE	FALSE	FALSE	FALSE	2	2	2	2	1	1	1	1	1	1	1	1	1	1	1	1	1	1	1	1	1	1	1	1	1	FALSE	FALSE	FALSE	FALSE	FALSE	FALSE	FALSE	FALSE	FALSE	FALSE	FALSE
51	Villastar	4.9	7.3		FALSE	FALSE	FALSE	FALSE	FALSE	FALSE	FALSE	FALSE	FALSE	2	2	2	2	1	1	1	1	1	1	1	1	1	1	1	1	1	1	1	1	1	1	1	1	1	FALSE	FALSE	FALSE	FALSE	FALSE	FALSE	FALSE	FALSE	FALSE	FALSE	FALSE
52	Almenara-Casablanca M	4.9	7.3		FALSE	FALSE	FALSE	FALSE	FALSE	FALSE	FALSE	FALSE	FALSE	2	2	2	2	1	1	1	1	1	1	1	1	1	1	1	1	1	1	1	1	1	1	1	1	1	FALSE	FALSE	FALSE	FALSE	FALSE	FALSE	FALSE	FALSE	FALSE	FALSE	FALSE
53	Montredon	8.7	9.7		FALSE	FALSE	FALSE	FALSE	FALSE	FALSE	FALSE	FALSE	FALSE	FALSE	FALSE	FALSE	FALSE	FALSE	FALSE	FALSE	FALSE	FALSE	FALSE	FALSE	FALSE	FALSE	FALSE	FALSE	FALSE	FALSE	FALSE	FALSE	FALSE	FALSE	FALSE	FALSE	FALSE	FALSE	FALSE	FALSE	FALSE	FALSE	FALSE	FALSE	FALSE	FALSE	FALSE	FALSE	FALSE
54	Nombrevilla	9.7	11.1		FALSE	FALSE	FALSE	FALSE	FALSE	FALSE	FALSE	FALSE	FALSE	FALSE	FALSE	FALSE	FALSE	FALSE	FALSE	FALSE	FALSE	FALSE	FALSE	FALSE	FALSE	FALSE	FALSE	FALSE	FALSE	FALSE	FALSE	FALSE	FALSE	FALSE	FALSE	FALSE	FALSE	FALSE	FALSE	FALSE	FALSE	FALSE	FALSE	FALSE	FALSE	FALSE	FALSE	FALSE	FALSE
55	Puente Minero	7.8	8.7		FALSE	FALSE	FALSE	FALSE	FALSE	FALSE	FALSE	FALSE	FALSE	FALSE	FALSE	FALSE	FALSE	FALSE	FALSE	FALSE	FALSE	FALSE	FALSE	FALSE	FALSE	FALSE	FALSE	FALSE	FALSE	FALSE	FALSE	FALSE	FALSE	FALSE	FALSE	FALSE	FALSE	FALSE	FALSE	FALSE	FALSE	FALSE	1	1	1	1	1	1	1
56	Kohfidisch	8.7	9.7		FALSE	FALSE	FALSE	FALSE	FALSE	FALSE	FALSE	FALSE	FALSE	FALSE	FALSE	FALSE	FALSE	FALSE	FALSE	FALSE	FALSE	FALSE	FALSE	FALSE	FALSE	FALSE	FALSE	FALSE	FALSE	FALSE	FALSE	FALSE	FALSE	FALSE	FALSE	FALSE	FALSE	FALSE	FALSE	FALSE	FALSE	FALSE	FALSE	FALSE	FALSE	FALSE	FALSE	FALSE	FALSE
57	Ravin des Zouaves 1	8.7	9.7		FALSE	FALSE	FALSE	FALSE	FALSE	FALSE	FALSE	FALSE	FALSE	FALSE	FALSE	FALSE	FALSE	FALSE	FALSE	FALSE	FALSE	FALSE	FALSE	FALSE	FALSE	FALSE	FALSE	FALSE	FALSE	FALSE	FALSE	FALSE	FALSE	FALSE	FALSE	FALSE	FALSE	FALSE	FALSE	FALSE	FALSE	FALSE	FALSE	FALSE	FALSE	FALSE	FALSE	FALSE	FALSE
58	Brisighella	4.9	7.3		FALSE	FALSE	FALSE	FALSE	FALSE	FALSE	FALSE	FALSE	FALSE	2	2	2	2	1	1	1	1	1	1	1	1	1	1	1	1	1	1	1	1	1	1	1	1	1	FALSE	FALSE	FALSE	FALSE	FALSE	FALSE	FALSE	FALSE	FALSE	FALSE	FALSE
59	Mt. Luberon	7.3	7.8		FALSE	FALSE	FALSE	FALSE	FALSE	FALSE	FALSE	FALSE	FALSE	FALSE	FALSE	FALSE	FALSE	FALSE	FALSE	FALSE	FALSE	FALSE	FALSE	FALSE	FALSE	FALSE	FALSE	FALSE	FALSE	FALSE	FALSE	FALSE	FALSE	FALSE	FALSE	FALSE	FALSE	1	1	1	1	1	1	FALSE	FALSE	FALSE	FALSE	FALSE	FALSE
60	Doué-la-Fontaine	9.7	11.1		FALSE	FALSE	FALSE	FALSE	FALSE	FALSE	FALSE	FALSE	FALSE	FALSE	FALSE	FALSE	FALSE	FALSE	FALSE	FALSE	FALSE	FALSE	FALSE	FALSE	FALSE	FALSE	FALSE	FALSE	FALSE	FALSE	FALSE	FALSE	FALSE	FALSE	FALSE	FALSE	FALSE	FALSE	FALSE	FALSE	FALSE	FALSE	FALSE	FALSE	FALSE	FALSE	FALSE	FALSE	FALSE
61	Soblay	8.7	9.7		FALSE	FALSE	FALSE	FALSE	FALSE	FALSE	FALSE	FALSE	FALSE	FALSE	FALSE	FALSE	FALSE	FALSE	FALSE	FALSE	FALSE	FALSE	FALSE	FALSE	FALSE	FALSE	FALSE	FALSE	FALSE	FALSE	FALSE	FALSE	FALSE	FALSE	FALSE	FALSE	FALSE	FALSE	FALSE	FALSE	FALSE	FALSE	FALSE	FALSE	FALSE	FALSE	FALSE	FALSE	FALSE
62	Priay II	9.7	11.1		FALSE	FALSE	FALSE	FALSE	FALSE	FALSE	FALSE	FALSE	FALSE	FALSE	FALSE	FALSE	FALSE	FALSE	FALSE	FALSE	FALSE	FALSE	FALSE	FALSE	FALSE	FALSE	FALSE	FALSE	FALSE	FALSE	FALSE	FALSE	FALSE	FALSE	FALSE	FALSE	FALSE	FALSE	FALSE	FALSE	FALSE	FALSE	FALSE	FALSE	FALSE	FALSE	FALSE	FALSE	FALSE
63	Kalmakpaj	4.9	7.3		FALSE	FALSE	FALSE	FALSE	FALSE	FALSE	FALSE	FALSE	FALSE	2	2	2	2	1	1	1	1	1	1	1	1	1	1	1	1	1	1	1	1	1	1	1	1	1	FALSE	FALSE	FALSE	FALSE	FALSE	FALSE	FALSE	FALSE	FALSE	FALSE	FALSE
64	La Tarumba I	8.7	9.7		FALSE	FALSE	FALSE	FALSE	FALSE	FALSE	FALSE	FALSE	FALSE	FALSE	FALSE	FALSE	FALSE	FALSE	FALSE	FALSE	FALSE	FALSE	FALSE	FALSE	FALSE	FALSE	FALSE	FALSE	FALSE	FALSE	FALSE	FALSE	FALSE	FALSE	FALSE	FALSE	FALSE	FALSE	FALSE	FALSE	FALSE	FALSE	FALSE	FALSE	FALSE	FALSE	FALSE	FALSE	FALSE
65	Terrassa	8.7	9.7		FALSE	FALSE	FALSE	FALSE	FALSE	FALSE	FALSE	FALSE	FALSE	FALSE	FALSE	FALSE	FALSE	FALSE	FALSE	FALSE	FALSE	FALSE	FALSE	FALSE	FALSE	FALSE	FALSE	FALSE	FALSE	FALSE	FALSE	FALSE	FALSE	FALSE	FALSE	FALSE	FALSE	FALSE	FALSE	FALSE	FALSE	FALSE	FALSE	FALSE	FALSE	FALSE	FALSE	FALSE	FALSE
66	Seu d'Urgel	9.7	11.1		FALSE	FALSE	FALSE	FALSE	FALSE	FALSE	FALSE	FALSE	FALSE	FALSE	FALSE	FALSE	FALSE	FALSE	FALSE	FALSE	FALSE	FALSE	FALSE	FALSE	FALSE	FALSE	FALSE	FALSE	FALSE	FALSE	FALSE	FALSE	FALSE	FALSE	FALSE	FALSE	FALSE	FALSE	FALSE	FALSE	FALSE	FALSE	FALSE	FALSE	FALSE	FALSE	FALSE	FALSE	FALSE
67	Ananjev	4.9	7.3		FALSE	FALSE	FALSE	FALSE	FALSE	FALSE	FALSE	FALSE	FALSE	2	2	2	2	1	1	1	1	1	1	1	1	1	1	1	1	1	1	1	1	1	1	1	1	1	FALSE	FALSE	FALSE	FALSE	FALSE	FALSE	FALSE	FALSE	FALSE	FALSE	FALSE
68	Arkneti	7.8	8.7		FALSE	FALSE	FALSE	FALSE	FALSE	FALSE	FALSE	FALSE	FALSE	FALSE	FALSE	FALSE	FALSE	FALSE	FALSE	FALSE	FALSE	FALSE	FALSE	FALSE	FALSE	FALSE	FALSE	FALSE	FALSE	FALSE	FALSE	FALSE	FALSE	FALSE	FALSE	FALSE	FALSE	FALSE	FALSE	FALSE	FALSE	FALSE	1	1	1	1	1	1	1
69	Bazaleti	4.9	7.3		FALSE	FALSE	FALSE	FALSE	FALSE	FALSE	FALSE	FALSE	FALSE	2	2	2	2	1	1	1	1	1	1	1	1	1	1	1	1	1	1	1	1	1	1	1	1	1	FALSE	FALSE	FALSE	FALSE	FALSE	FALSE	FALSE	FALSE	FALSE	FALSE	FALSE
70	Belka	7.3	7.8		FALSE	FALSE	FALSE	FALSE	FALSE	FALSE	FALSE	FALSE	FALSE	FALSE	FALSE	FALSE	FALSE	FALSE	FALSE	FALSE	FALSE	FALSE	FALSE	FALSE	FALSE	FALSE	FALSE	FALSE	FALSE	FALSE	FALSE	FALSE	FALSE	FALSE	FALSE	FALSE	FALSE	1	1	1	1	1	1	FALSE	FALSE	FALSE	FALSE	FALSE	FALSE
71	Buzhor 1	9.7	11.1		FALSE	FALSE	FALSE	FALSE	FALSE	FALSE	FALSE	FALSE	FALSE	FALSE	FALSE	FALSE	FALSE	FALSE	FALSE	FALSE	FALSE	FALSE	FALSE	FALSE	FALSE	FALSE	FALSE	FALSE	FALSE	FALSE	FALSE	FALSE	FALSE	FALSE	FALSE	FALSE	FALSE	FALSE	FALSE	FALSE	FALSE	FALSE	FALSE	FALSE	FALSE	FALSE	FALSE	FALSE	FALSE
72	Bled Douarah	9.7	11.1		FALSE	FALSE	FALSE	FALSE	FALSE	FALSE	FALSE	FALSE	FALSE	FALSE	FALSE	FALSE	FALSE	FALSE	FALSE	FALSE	FALSE	FALSE	FALSE	FALSE	FALSE	FALSE	FALSE	FALSE	FALSE	FALSE	FALSE	FALSE	FALSE	FALSE	FALSE	FALSE	FALSE	FALSE	FALSE	FALSE	FALSE	FALSE	FALSE	FALSE	FALSE	FALSE	FALSE	FALSE	FALSE
73	Bou Hanifia	9.7	11.1		FALSE	FALSE	FALSE	FALSE	FALSE	FALSE	FALSE	FALSE	FALSE	FALSE	FALSE	FALSE	FALSE	FALSE	FALSE	FALSE	FALSE	FALSE	FALSE	FALSE	FALSE	FALSE	FALSE	FALSE	FALSE	FALSE	FALSE	FALSE	FALSE	FALSE	FALSE	FALSE	FALSE	FALSE	FALSE	FALSE	FALSE	FALSE	FALSE	FALSE	FALSE	FALSE	FALSE	FALSE	FALSE
74	Douaria	4.9	7.3		FALSE	FALSE	FALSE	FALSE	FALSE	FALSE	FALSE	FALSE	FALSE	2	2	2	2	1	1	1	1	1	1	1	1	1	1	1	1	1	1	1	1	1	1	1	1	1	FALSE	FALSE	FALSE	FALSE	FALSE	FALSE	FALSE	FALSE	FALSE	FALSE	FALSE
75	Ebic	7.3	7.8		FALSE	FALSE	FALSE	FALSE	FALSE	FALSE	FALSE	FALSE	FALSE	FALSE	FALSE	FALSE	FALSE	FALSE	FALSE	FALSE	FALSE	FALSE	FALSE	FALSE	FALSE	FALSE	FALSE	FALSE	FALSE	FALSE	FALSE	FALSE	FALSE	FALSE	FALSE	FALSE	FALSE	1	1	1	1	1	1	FALSE	FALSE	FALSE	FALSE	FALSE	FALSE
76	Injana	7.8	8.7		FALSE	FALSE	FALSE	FALSE	FALSE	FALSE	FALSE	FALSE	FALSE	FALSE	FALSE	FALSE	FALSE	FALSE	FALSE	FALSE	FALSE	FALSE	FALSE	FALSE	FALSE	FALSE	FALSE	FALSE	FALSE	FALSE	FALSE	FALSE	FALSE	FALSE	FALSE	FALSE	FALSE	FALSE	FALSE	FALSE	FALSE	FALSE	1	1	1	1	1	1	1
77	Djebel Krechem el Artsouma	7.8	8.7		FALSE	FALSE	FALSE	FALSE	FALSE	FALSE	FALSE	FALSE	FALSE	FALSE	FALSE	FALSE	FALSE	FALSE	FALSE	FALSE	FALSE	FALSE	FALSE	FALSE	FALSE	FALSE	FALSE	FALSE	FALSE	FALSE	FALSE	FALSE	FALSE	FALSE	FALSE	FALSE	FALSE	FALSE	FALSE	FALSE	FALSE	FALSE	1	1	1	1	1	1	1
78	Gura-Galben	7.3	7.8		FALSE	FALSE	FALSE	FALSE	FALSE	FALSE	FALSE	FALSE	FALSE	FALSE	FALSE	FALSE	FALSE	FALSE	FALSE	FALSE	FALSE	FALSE	FALSE	FALSE	FALSE	FALSE	FALSE	FALSE	FALSE	FALSE	FALSE	FALSE	FALSE	FALSE	FALSE	FALSE	FALSE	1	1	1	1	1	1	FALSE	FALSE	FALSE	FALSE	FALSE	FALSE
79	Isakovo	9.7	11.1		FALSE	FALSE	FALSE	FALSE	FALSE	FALSE	FALSE	FALSE	FALSE	FALSE	FALSE	FALSE	FALSE	FALSE	FALSE	FALSE	FALSE	FALSE	FALSE	FALSE	FALSE	FALSE	FALSE	FALSE	FALSE	FALSE	FALSE	FALSE	FALSE	FALSE	FALSE	FALSE	FALSE	FALSE	FALSE	FALSE	FALSE	FALSE	FALSE	FALSE	FALSE	FALSE	FALSE	FALSE	FALSE
80	Lapushna	9.7	11.1		FALSE	FALSE	FALSE	FALSE	FALSE	FALSE	FALSE	FALSE	FALSE	FALSE	FALSE	FALSE	FALSE	FALSE	FALSE	FALSE	FALSE	FALSE	FALSE	FALSE	FALSE	FALSE	FALSE	FALSE	FALSE	FALSE	FALSE	FALSE	FALSE	FALSE	FALSE	FALSE	FALSE	FALSE	FALSE	FALSE	FALSE	FALSE	FALSE	FALSE	FALSE	FALSE	FALSE	FALSE	FALSE
81	Lassnitz	7.3	7.8		FALSE	FALSE	FALSE	FALSE	FALSE	FALSE	FALSE	FALSE	FALSE	FALSE	FALSE	FALSE	FALSE	FALSE	FALSE	FALSE	FALSE	FALSE	FALSE	FALSE	FALSE	FALSE	FALSE	FALSE	FALSE	FALSE	FALSE	FALSE	FALSE	FALSE	FALSE	FALSE	FALSE	1	1	1	1	1	1	FALSE	FALSE	FALSE	FALSE	FALSE	FALSE
82	Maramena	4.9	7.3		FALSE	FALSE	FALSE	FALSE	FALSE	FALSE	FALSE	FALSE	FALSE	2	2	2	2	1	1	1	1	1	1	1	1	1	1	1	1	1	1	1	1	1	1	1	1	1	FALSE	FALSE	FALSE	FALSE	FALSE	FALSE	FALSE	FALSE	FALSE	FALSE	FALSE
83	Mistelbach	9.7	11.1		FALSE	FALSE	FALSE	FALSE	FALSE	FALSE	FALSE	FALSE	FALSE	FALSE	FALSE	FALSE	FALSE	FALSE	FALSE	FALSE	FALSE	FALSE	FALSE	FALSE	FALSE	FALSE	FALSE	FALSE	FALSE	FALSE	FALSE	FALSE	FALSE	FALSE	FALSE	FALSE	FALSE	FALSE	FALSE	FALSE	FALSE	FALSE	FALSE	FALSE	FALSE	FALSE	FALSE	FALSE	FALSE
84	Novaja Emetovka	7.8	8.7		FALSE	FALSE	FALSE	FALSE	FALSE	FALSE	FALSE	FALSE	FALSE	FALSE	FALSE	FALSE	FALSE	FALSE	FALSE	FALSE	FALSE	FALSE	FALSE	FALSE	FALSE	FALSE	FALSE	FALSE	FALSE	FALSE	FALSE	FALSE	FALSE	FALSE	FALSE	FALSE	FALSE	FALSE	FALSE	FALSE	FALSE	FALSE	1	1	1	1	1	1	1
85	Novo-Elizavetovka 2	7.8	8.7		FALSE	FALSE	FALSE	FALSE	FALSE	FALSE	FALSE	FALSE	FALSE	FALSE	FALSE	FALSE	FALSE	FALSE	FALSE	FALSE	FALSE	FALSE	FALSE	FALSE	FALSE	FALSE	FALSE	FALSE	FALSE	FALSE	FALSE	FALSE	FALSE	FALSE	FALSE	FALSE	FALSE	FALSE	FALSE	FALSE	FALSE	FALSE	1	1	1	1	1	1	1
86	Novoukrainka	8.7	9.7		FALSE	FALSE	FALSE	FALSE	FALSE	FALSE	FALSE	FALSE	FALSE	FALSE	FALSE	FALSE	FALSE	FALSE	FALSE	FALSE	FALSE	FALSE	FALSE	FALSE	FALSE	FALSE	FALSE	FALSE	FALSE	FALSE	FALSE	FALSE	FALSE	FALSE	FALSE	FALSE	FALSE	FALSE	FALSE	FALSE	FALSE	FALSE	FALSE	FALSE	FALSE	FALSE	FALSE	FALSE	FALSE
87	Oberhollabrunn	9.7	11.1		FALSE	FALSE	FALSE	FALSE	FALSE	FALSE	FALSE	FALSE	FALSE	FALSE	FALSE	FALSE	FALSE	FALSE	FALSE	FALSE	FALSE	FALSE	FALSE	FALSE	FALSE	FALSE	FALSE	FALSE	FALSE	FALSE	FALSE	FALSE	FALSE	FALSE	FALSE	FALSE	FALSE	FALSE	FALSE	FALSE	FALSE	FALSE	FALSE	FALSE	FALSE	FALSE	FALSE	FALSE	FALSE
88	Respopeny	8.7	9.7		FALSE	FALSE	FALSE	FALSE	FALSE	FALSE	FALSE	FALSE	FALSE	FALSE	FALSE	FALSE	FALSE	FALSE	FALSE	FALSE	FALSE	FALSE	FALSE	FALSE	FALSE	FALSE	FALSE	FALSE	FALSE	FALSE	FALSE	FALSE	FALSE	FALSE	FALSE	FALSE	FALSE	FALSE	FALSE	FALSE	FALSE	FALSE	FALSE	FALSE	FALSE	FALSE	FALSE	FALSE	FALSE
89	Himberg	9.7	11.1		FALSE	FALSE	FALSE	FALSE	FALSE	FALSE	FALSE	FALSE	FALSE	FALSE	FALSE	FALSE	FALSE	FALSE	FALSE	FALSE	FALSE	FALSE	FALSE	FALSE	FALSE	FALSE	FALSE	FALSE	FALSE	FALSE	FALSE	FALSE	FALSE	FALSE	FALSE	FALSE	FALSE	FALSE	FALSE	FALSE	FALSE	FALSE	FALSE	FALSE	FALSE	FALSE	FALSE	FALSE	FALSE
90	Halmyropotamos (HAL)	7.3	7.8		FALSE	FALSE	FALSE	FALSE	FALSE	FALSE	FALSE	FALSE	FALSE	FALSE	FALSE	FALSE	FALSE	FALSE	FALSE	FALSE	FALSE	FALSE	FALSE	FALSE	FALSE	FALSE	FALSE	FALSE	FALSE	FALSE	FALSE	FALSE	FALSE	FALSE	FALSE	FALSE	FALSE	1	1	1	1	1	1	FALSE	FALSE	FALSE	FALSE	FALSE	FALSE
91	Baccinello V2	7.3	7.8		FALSE	FALSE	FALSE	FALSE	FALSE	FALSE	FALSE	FALSE	FALSE	FALSE	FALSE	FALSE	FALSE	FALSE	FALSE	FALSE	FALSE	FALSE	FALSE	FALSE	FALSE	FALSE	FALSE	FALSE	FALSE	FALSE	FALSE	FALSE	FALSE	FALSE	FALSE	FALSE	FALSE	1	1	1	1	1	1	FALSE	FALSE	FALSE	FALSE	FALSE	FALSE
92	Baccinello V3	4.9	7.3		FALSE	FALSE	FALSE	FALSE	FALSE	FALSE	FALSE	FALSE	FALSE	2	2	2	2	1	1	1	1	1	1	1	1	1	1	1	1	1	1	1	1	1	1	1	1	1	FALSE	FALSE	FALSE	FALSE	FALSE	FALSE	FALSE	FALSE	FALSE	FALSE	FALSE
93	Baccinello V1	7.3	7.8		FALSE	FALSE	FALSE	FALSE	FALSE	FALSE	FALSE	FALSE	FALSE	FALSE	FALSE	FALSE	FALSE	FALSE	FALSE	FALSE	FALSE	FALSE	FALSE	FALSE	FALSE	FALSE	FALSE	FALSE	FALSE	FALSE	FALSE	FALSE	FALSE	FALSE	FALSE	FALSE	FALSE	1	1	1	1	1	1	FALSE	FALSE	FALSE	FALSE	FALSE	FALSE
94	Baccinello V0	7.8	8.7		FALSE	FALSE	FALSE	FALSE	FALSE	FALSE	FALSE	FALSE	FALSE	FALSE	FALSE	FALSE	FALSE	FALSE	FALSE	FALSE	FALSE	FALSE	FALSE	FALSE	FALSE	FALSE	FALSE	FALSE	FALSE	FALSE	FALSE	FALSE	FALSE	FALSE	FALSE	FALSE	FALSE	FALSE	FALSE	FALSE	FALSE	FALSE	1	1	1	1	1	1	1
95	Middle Sinap	9.7	11.1		FALSE	FALSE	FALSE	FALSE	FALSE	FALSE	FALSE	FALSE	FALSE	FALSE	FALSE	FALSE	FALSE	FALSE	FALSE	FALSE	FALSE	FALSE	FALSE	FALSE	FALSE	FALSE	FALSE	FALSE	FALSE	FALSE	FALSE	FALSE	FALSE	FALSE	FALSE	FALSE	FALSE	FALSE	FALSE	FALSE	FALSE	FALSE	FALSE	FALSE	FALSE	FALSE	FALSE	FALSE	FALSE
96	Çobanpinar (Sinap 42)	7.3	7.8		FALSE	FALSE	FALSE	FALSE	FALSE	FALSE	FALSE	FALSE	FALSE	FALSE	FALSE	FALSE	FALSE	FALSE	FALSE	FALSE	FALSE	FALSE	FALSE	FALSE	FALSE	FALSE	FALSE	FALSE	FALSE	FALSE	FALSE	FALSE	FALSE	FALSE	FALSE	FALSE	FALSE	1	1	1	1	1	1	FALSE	FALSE	FALSE	FALSE	FALSE	FALSE
97	Esme Akçaköy	9.7	11.1		FALSE	FALSE	FALSE	FALSE	FALSE	FALSE	FALSE	FALSE	FALSE	FALSE	FALSE	FALSE	FALSE	FALSE	FALSE	FALSE	FALSE	FALSE	FALSE	FALSE	FALSE	FALSE	FALSE	FALSE	FALSE	FALSE	FALSE	FALSE	FALSE	FALSE	FALSE	FALSE	FALSE	FALSE	FALSE	FALSE	FALSE	FALSE	FALSE	FALSE	FALSE	FALSE	FALSE	FALSE	FALSE
98	Kayadibi	7.8	8.7		FALSE	FALSE	FALSE	FALSE	FALSE	FALSE	FALSE	FALSE	FALSE	FALSE	FALSE	FALSE	FALSE	FALSE	FALSE	FALSE	FALSE	FALSE	FALSE	FALSE	FALSE	FALSE	FALSE	FALSE	FALSE	FALSE	FALSE	FALSE	FALSE	FALSE	FALSE	FALSE	FALSE	FALSE	FALSE	FALSE	FALSE	FALSE	1	1	1	1	1	1	1
99	Gülpinar	8.7	9.7		FALSE	FALSE	FALSE	FALSE	FALSE	FALSE	FALSE	FALSE	FALSE	FALSE	FALSE	FALSE	FALSE	FALSE	FALSE	FALSE	FALSE	FALSE	FALSE	FALSE	FALSE	FALSE	FALSE	FALSE	FALSE	FALSE	FALSE	FALSE	FALSE	FALSE	FALSE	FALSE	FALSE	FALSE	FALSE	FALSE	FALSE	FALSE	FALSE	FALSE	FALSE	FALSE	FALSE	FALSE	FALSE
100	Küçükçekmece	7.8	8.7		FALSE	FALSE	FALSE	FALSE	FALSE	FALSE	FALSE	FALSE	FALSE	FALSE	FALSE	FALSE	FALSE	FALSE	FALSE	FALSE	FALSE	FALSE	FALSE	FALSE	FALSE	FALSE	FALSE	FALSE	FALSE	FALSE	FALSE	FALSE	FALSE	FALSE	FALSE	FALSE	FALSE	FALSE	FALSE	FALSE	FALSE	FALSE	1	1	1	1	1	1	1
101	Eski Bayirköy	7.3	7.8		FALSE	FALSE	FALSE	FALSE	FALSE	FALSE	FALSE	FALSE	FALSE	FALSE	FALSE	FALSE	FALSE	FALSE	FALSE	FALSE	FALSE	FALSE	FALSE	FALSE	FALSE	FALSE	FALSE	FALSE	FALSE	FALSE	FALSE	FALSE	FALSE	FALSE	FALSE	FALSE	FALSE	1	1	1	1	1	1	FALSE	FALSE	FALSE	FALSE	FALSE	FALSE
102	Mahmutgazi	7.3	7.8		FALSE	FALSE	FALSE	FALSE	FALSE	FALSE	FALSE	FALSE	FALSE	FALSE	FALSE	FALSE	FALSE	FALSE	FALSE	FALSE	FALSE	FALSE	FALSE	FALSE	FALSE	FALSE	FALSE	FALSE	FALSE	FALSE	FALSE	FALSE	FALSE	FALSE	FALSE	FALSE	FALSE	1	1	1	1	1	1	FALSE	FALSE	FALSE	FALSE	FALSE	FALSE
103	Massenhausen	9.7	11.1		FALSE	FALSE	FALSE	FALSE	FALSE	FALSE	FALSE	FALSE	FALSE	FALSE	FALSE	FALSE	FALSE	FALSE	FALSE	FALSE	FALSE	FALSE	FALSE	FALSE	FALSE	FALSE	FALSE	FALSE	FALSE	FALSE	FALSE	FALSE	FALSE	FALSE	FALSE	FALSE	FALSE	FALSE	FALSE	FALSE	FALSE	FALSE	FALSE	FALSE	FALSE	FALSE	FALSE	FALSE	FALSE
104	Gau-Weinheim	9.7	11.1		FALSE	FALSE	FALSE	FALSE	FALSE	FALSE	FALSE	FALSE	FALSE	FALSE	FALSE	FALSE	FALSE	FALSE	FALSE	FALSE	FALSE	FALSE	FALSE	FALSE	FALSE	FALSE	FALSE	FALSE	FALSE	FALSE	FALSE	FALSE	FALSE	FALSE	FALSE	FALSE	FALSE	FALSE	FALSE	FALSE	FALSE	FALSE	FALSE	FALSE	FALSE	FALSE	FALSE	FALSE	FALSE
105	Esselborn	9.7	11.1		FALSE	FALSE	FALSE	FALSE	FALSE	FALSE	FALSE	FALSE	FALSE	FALSE	FALSE	FALSE	FALSE	FALSE	FALSE	FALSE	FALSE	FALSE	FALSE	FALSE	FALSE	FALSE	FALSE	FALSE	FALSE	FALSE	FALSE	FALSE	FALSE	FALSE	FALSE	FALSE	FALSE	FALSE	FALSE	FALSE	FALSE	FALSE	FALSE	FALSE	FALSE	FALSE	FALSE	FALSE	FALSE
106	Höwenegg	9.7	11.1		FALSE	FALSE	FALSE	FALSE	FALSE	FALSE	FALSE	FALSE	FALSE	FALSE	FALSE	FALSE	FALSE	FALSE	FALSE	FALSE	FALSE	FALSE	FALSE	FALSE	FALSE	FALSE	FALSE	FALSE	FALSE	FALSE	FALSE	FALSE	FALSE	FALSE	FALSE	FALSE	FALSE	FALSE	FALSE	FALSE	FALSE	FALSE	FALSE	FALSE	FALSE	FALSE	FALSE	FALSE	FALSE
107	Melchingen	9.7	11.1		FALSE	FALSE	FALSE	FALSE	FALSE	FALSE	FALSE	FALSE	FALSE	FALSE	FALSE	FALSE	FALSE	FALSE	FALSE	FALSE	FALSE	FALSE	FALSE	FALSE	FALSE	FALSE	FALSE	FALSE	FALSE	FALSE	FALSE	FALSE	FALSE	FALSE	FALSE	FALSE	FALSE	FALSE	FALSE	FALSE	FALSE	FALSE	FALSE	FALSE	FALSE	FALSE	FALSE	FALSE	FALSE
108	München	9.7	11.1		FALSE	FALSE	FALSE	FALSE	FALSE	FALSE	FALSE	FALSE	FALSE	FALSE	FALSE	FALSE	FALSE	FALSE	FALSE	FALSE	FALSE	FALSE	FALSE	FALSE	FALSE	FALSE	FALSE	FALSE	FALSE	FALSE	FALSE	FALSE	FALSE	FALSE	FALSE	FALSE	FALSE	FALSE	FALSE	FALSE	FALSE	FALSE	FALSE	FALSE	FALSE	FALSE	FALSE	FALSE	FALSE
109	Oberföhring	9.7	11.1		FALSE	FALSE	FALSE	FALSE	FALSE	FALSE	FALSE	FALSE	FALSE	FALSE	FALSE	FALSE	FALSE	FALSE	FALSE	FALSE	FALSE	FALSE	FALSE	FALSE	FALSE	FALSE	FALSE	FALSE	FALSE	FALSE	FALSE	FALSE	FALSE	FALSE	FALSE	FALSE	FALSE	FALSE	FALSE	FALSE	FALSE	FALSE	FALSE	FALSE	FALSE	FALSE	FALSE	FALSE	FALSE
110	Wartenberg	9.7	11.1		FALSE	FALSE	FALSE	FALSE	FALSE	FALSE	FALSE	FALSE	FALSE	FALSE	FALSE	FALSE	FALSE	FALSE	FALSE	FALSE	FALSE	FALSE	FALSE	FALSE	FALSE	FALSE	FALSE	FALSE	FALSE	FALSE	FALSE	FALSE	FALSE	FALSE	FALSE	FALSE	FALSE	FALSE	FALSE	FALSE	FALSE	FALSE	FALSE	FALSE	FALSE	FALSE	FALSE	FALSE	FALSE
111	Wien-Belvedere	9.7	11.1		FALSE	FALSE	FALSE	FALSE	FALSE	FALSE	FALSE	FALSE	FALSE	FALSE	FALSE	FALSE	FALSE	FALSE	FALSE	FALSE	FALSE	FALSE	FALSE	FALSE	FALSE	FALSE	FALSE	FALSE	FALSE	FALSE	FALSE	FALSE	FALSE	FALSE	FALSE	FALSE	FALSE	FALSE	FALSE	FALSE	FALSE	FALSE	FALSE	FALSE	FALSE	FALSE	FALSE	FALSE	FALSE
112	Salmendingen	9.7	11.1		FALSE	FALSE	FALSE	FALSE	FALSE	FALSE	FALSE	FALSE	FALSE	FALSE	FALSE	FALSE	FALSE	FALSE	FALSE	FALSE	FALSE	FALSE	FALSE	FALSE	FALSE	FALSE	FALSE	FALSE	FALSE	FALSE	FALSE	FALSE	FALSE	FALSE	FALSE	FALSE	FALSE	FALSE	FALSE	FALSE	FALSE	FALSE	FALSE	FALSE	FALSE	FALSE	FALSE	FALSE	FALSE
113	Polgardi	4.9	7.3		FALSE	FALSE	FALSE	FALSE	FALSE	FALSE	FALSE	FALSE	FALSE	2	2	2	2	1	1	1	1	1	1	1	1	1	1	1	1	1	1	1	1	1	1	1	1	1	FALSE	FALSE	FALSE	FALSE	FALSE	FALSE	FALSE	FALSE	FALSE	FALSE	FALSE
114	Dorn Dürkheim 1	7.8	8.7		FALSE	FALSE	FALSE	FALSE	FALSE	FALSE	FALSE	FALSE	FALSE	FALSE	FALSE	FALSE	FALSE	FALSE	FALSE	FALSE	FALSE	FALSE	FALSE	FALSE	FALSE	FALSE	FALSE	FALSE	FALSE	FALSE	FALSE	FALSE	FALSE	FALSE	FALSE	FALSE	FALSE	FALSE	FALSE	FALSE	FALSE	FALSE	1	1	1	1	1	1	1
115	Monte Bamboli	7.3	7.8		FALSE	FALSE	FALSE	FALSE	FALSE	FALSE	FALSE	FALSE	FALSE	FALSE	FALSE	FALSE	FALSE	FALSE	FALSE	FALSE	FALSE	FALSE	FALSE	FALSE	FALSE	FALSE	FALSE	FALSE	FALSE	FALSE	FALSE	FALSE	FALSE	FALSE	FALSE	FALSE	FALSE	1	1	1	1	1	1	FALSE	FALSE	FALSE	FALSE	FALSE	FALSE
116	Casteani	7.3	7.8		FALSE	FALSE	FALSE	FALSE	FALSE	FALSE	FALSE	FALSE	FALSE	FALSE	FALSE	FALSE	FALSE	FALSE	FALSE	FALSE	FALSE	FALSE	FALSE	FALSE	FALSE	FALSE	FALSE	FALSE	FALSE	FALSE	FALSE	FALSE	FALSE	FALSE	FALSE	FALSE	FALSE	1	1	1	1	1	1	FALSE	FALSE	FALSE	FALSE	FALSE	FALSE
117	Montemassi	7.3	7.8		FALSE	FALSE	FALSE	FALSE	FALSE	FALSE	FALSE	FALSE	FALSE	FALSE	FALSE	FALSE	FALSE	FALSE	FALSE	FALSE	FALSE	FALSE	FALSE	FALSE	FALSE	FALSE	FALSE	FALSE	FALSE	FALSE	FALSE	FALSE	FALSE	FALSE	FALSE	FALSE	FALSE	1	1	1	1	1	1	FALSE	FALSE	FALSE	FALSE	FALSE	FALSE
118	Ribolla	7.3	7.8		FALSE	FALSE	FALSE	FALSE	FALSE	FALSE	FALSE	FALSE	FALSE	FALSE	FALSE	FALSE	FALSE	FALSE	FALSE	FALSE	FALSE	FALSE	FALSE	FALSE	FALSE	FALSE	FALSE	FALSE	FALSE	FALSE	FALSE	FALSE	FALSE	FALSE	FALSE	FALSE	FALSE	1	1	1	1	1	1	FALSE	FALSE	FALSE	FALSE	FALSE	FALSE
119	Gravitelli	4.9	7.3		FALSE	FALSE	FALSE	FALSE	FALSE	FALSE	FALSE	FALSE	FALSE	2	2	2	2	1	1	1	1	1	1	1	1	1	1	1	1	1	1	1	1	1	1	1	1	1	FALSE	FALSE	FALSE	FALSE	FALSE	FALSE	FALSE	FALSE	FALSE	FALSE	FALSE
120	Casino	4.9	7.3		FALSE	FALSE	FALSE	FALSE	FALSE	FALSE	FALSE	FALSE	FALSE	2	2	2	2	1	1	1	1	1	1	1	1	1	1	1	1	1	1	1	1	1	1	1	1	1	FALSE	FALSE	FALSE	FALSE	FALSE	FALSE	FALSE	FALSE	FALSE	FALSE	FALSE
121	Mariathal	9.7	11.1		FALSE	FALSE	FALSE	FALSE	FALSE	FALSE	FALSE	FALSE	FALSE	FALSE	FALSE	FALSE	FALSE	FALSE	FALSE	FALSE	FALSE	FALSE	FALSE	FALSE	FALSE	FALSE	FALSE	FALSE	FALSE	FALSE	FALSE	FALSE	FALSE	FALSE	FALSE	FALSE	FALSE	FALSE	FALSE	FALSE	FALSE	FALSE	FALSE	FALSE	FALSE	FALSE	FALSE	FALSE	FALSE
122	Wissberg	9.7	11.1		FALSE	FALSE	FALSE	FALSE	FALSE	FALSE	FALSE	FALSE	FALSE	FALSE	FALSE	FALSE	FALSE	FALSE	FALSE	FALSE	FALSE	FALSE	FALSE	FALSE	FALSE	FALSE	FALSE	FALSE	FALSE	FALSE	FALSE	FALSE	FALSE	FALSE	FALSE	FALSE	FALSE	FALSE	FALSE	FALSE	FALSE	FALSE	FALSE	FALSE	FALSE	FALSE	FALSE	FALSE	FALSE
123	Götzendorf	9.7	11.1		FALSE	FALSE	FALSE	FALSE	FALSE	FALSE	FALSE	FALSE	FALSE	FALSE	FALSE	FALSE	FALSE	FALSE	FALSE	FALSE	FALSE	FALSE	FALSE	FALSE	FALSE	FALSE	FALSE	FALSE	FALSE	FALSE	FALSE	FALSE	FALSE	FALSE	FALSE	FALSE	FALSE	FALSE	FALSE	FALSE	FALSE	FALSE	FALSE	FALSE	FALSE	FALSE	FALSE	FALSE	FALSE
124	Sevastopol (Sebastopol)	9.7	11.1		FALSE	FALSE	FALSE	FALSE	FALSE	FALSE	FALSE	FALSE	FALSE	FALSE	FALSE	FALSE	FALSE	FALSE	FALSE	FALSE	FALSE	FALSE	FALSE	FALSE	FALSE	FALSE	FALSE	FALSE	FALSE	FALSE	FALSE	FALSE	FALSE	FALSE	FALSE	FALSE	FALSE	FALSE	FALSE	FALSE	FALSE	FALSE	FALSE	FALSE	FALSE	FALSE	FALSE	FALSE	FALSE
125	Rudabánya	9.7	11.1		FALSE	FALSE	FALSE	FALSE	FALSE	FALSE	FALSE	FALSE	FALSE	FALSE	FALSE	FALSE	FALSE	FALSE	FALSE	FALSE	FALSE	FALSE	FALSE	FALSE	FALSE	FALSE	FALSE	FALSE	FALSE	FALSE	FALSE	FALSE	FALSE	FALSE	FALSE	FALSE	FALSE	FALSE	FALSE	FALSE	FALSE	FALSE	FALSE	FALSE	FALSE	FALSE	FALSE	FALSE	FALSE
126	Hatvan	4.9	7.3		FALSE	FALSE	FALSE	FALSE	FALSE	FALSE	FALSE	FALSE	FALSE	2	2	2	2	1	1	1	1	1	1	1	1	1	1	1	1	1	1	1	1	1	1	1	1	1	FALSE	FALSE	FALSE	FALSE	FALSE	FALSE	FALSE	FALSE	FALSE	FALSE	FALSE
127	Baltavar	7.3	7.8		FALSE	FALSE	FALSE	FALSE	FALSE	FALSE	FALSE	FALSE	FALSE	FALSE	FALSE	FALSE	FALSE	FALSE	FALSE	FALSE	FALSE	FALSE	FALSE	FALSE	FALSE	FALSE	FALSE	FALSE	FALSE	FALSE	FALSE	FALSE	FALSE	FALSE	FALSE	FALSE	FALSE	1	1	1	1	1	1	FALSE	FALSE	FALSE	FALSE	FALSE	FALSE
128	Grebeniki	8.7	9.7		FALSE	FALSE	FALSE	FALSE	FALSE	FALSE	FALSE	FALSE	FALSE	FALSE	FALSE	FALSE	FALSE	FALSE	FALSE	FALSE	FALSE	FALSE	FALSE	FALSE	FALSE	FALSE	FALSE	FALSE	FALSE	FALSE	FALSE	FALSE	FALSE	FALSE	FALSE	FALSE	FALSE	FALSE	FALSE	FALSE	FALSE	FALSE	FALSE	FALSE	FALSE	FALSE	FALSE	FALSE	FALSE
129	Titov Veles	4.9	7.3		FALSE	FALSE	FALSE	FALSE	FALSE	FALSE	FALSE	FALSE	FALSE	2	2	2	2	1	1	1	1	1	1	1	1	1	1	1	1	1	1	1	1	1	1	1	1	1	FALSE	FALSE	FALSE	FALSE	FALSE	FALSE	FALSE	FALSE	FALSE	FALSE	FALSE
130	Kalimanci 2	7.3	7.8		FALSE	FALSE	FALSE	FALSE	FALSE	FALSE	FALSE	FALSE	FALSE	FALSE	FALSE	FALSE	FALSE	FALSE	FALSE	FALSE	FALSE	FALSE	FALSE	FALSE	FALSE	FALSE	FALSE	FALSE	FALSE	FALSE	FALSE	FALSE	FALSE	FALSE	FALSE	FALSE	FALSE	1	1	1	1	1	1	FALSE	FALSE	FALSE	FALSE	FALSE	FALSE
131	Kromidovo 2	7.3	7.8		FALSE	FALSE	FALSE	FALSE	FALSE	FALSE	FALSE	FALSE	FALSE	FALSE	FALSE	FALSE	FALSE	FALSE	FALSE	FALSE	FALSE	FALSE	FALSE	FALSE	FALSE	FALSE	FALSE	FALSE	FALSE	FALSE	FALSE	FALSE	FALSE	FALSE	FALSE	FALSE	FALSE	1	1	1	1	1	1	FALSE	FALSE	FALSE	FALSE	FALSE	FALSE
132	Gorna Susica	7.3	7.8		FALSE	FALSE	FALSE	FALSE	FALSE	FALSE	FALSE	FALSE	FALSE	FALSE	FALSE	FALSE	FALSE	FALSE	FALSE	FALSE	FALSE	FALSE	FALSE	FALSE	FALSE	FALSE	FALSE	FALSE	FALSE	FALSE	FALSE	FALSE	FALSE	FALSE	FALSE	FALSE	FALSE	1	1	1	1	1	1	FALSE	FALSE	FALSE	FALSE	FALSE	FALSE
133	Ravin de la Pluie (RPL)	8.7	9.7		FALSE	FALSE	FALSE	FALSE	FALSE	FALSE	FALSE	FALSE	FALSE	FALSE	FALSE	FALSE	FALSE	FALSE	FALSE	FALSE	FALSE	FALSE	FALSE	FALSE	FALSE	FALSE	FALSE	FALSE	FALSE	FALSE	FALSE	FALSE	FALSE	FALSE	FALSE	FALSE	FALSE	FALSE	FALSE	FALSE	FALSE	FALSE	FALSE	FALSE	FALSE	FALSE	FALSE	FALSE	FALSE
134	Xirochori 1 (XIR)	8.7	9.7		FALSE	FALSE	FALSE	FALSE	FALSE	FALSE	FALSE	FALSE	FALSE	FALSE	FALSE	FALSE	FALSE	FALSE	FALSE	FALSE	FALSE	FALSE	FALSE	FALSE	FALSE	FALSE	FALSE	FALSE	FALSE	FALSE	FALSE	FALSE	FALSE	FALSE	FALSE	FALSE	FALSE	FALSE	FALSE	FALSE	FALSE	FALSE	FALSE	FALSE	FALSE	FALSE	FALSE	FALSE	FALSE
135	Udabno I	9.7	11.1		FALSE	FALSE	FALSE	FALSE	FALSE	FALSE	FALSE	FALSE	FALSE	FALSE	FALSE	FALSE	FALSE	FALSE	FALSE	FALSE	FALSE	FALSE	FALSE	FALSE	FALSE	FALSE	FALSE	FALSE	FALSE	FALSE	FALSE	FALSE	FALSE	FALSE	FALSE	FALSE	FALSE	FALSE	FALSE	FALSE	FALSE	FALSE	FALSE	FALSE	FALSE	FALSE	FALSE	FALSE	FALSE
136	Pyrgos Vassilissis	7.8	8.7		FALSE	FALSE	FALSE	FALSE	FALSE	FALSE	FALSE	FALSE	FALSE	FALSE	FALSE	FALSE	FALSE	FALSE	FALSE	FALSE	FALSE	FALSE	FALSE	FALSE	FALSE	FALSE	FALSE	FALSE	FALSE	FALSE	FALSE	FALSE	FALSE	FALSE	FALSE	FALSE	FALSE	FALSE	FALSE	FALSE	FALSE	FALSE	1	1	1	1	1	1	1
137	Ravin des Zouaves 5	7.8	8.7		FALSE	FALSE	FALSE	FALSE	FALSE	FALSE	FALSE	FALSE	FALSE	FALSE	FALSE	FALSE	FALSE	FALSE	FALSE	FALSE	FALSE	FALSE	FALSE	FALSE	FALSE	FALSE	FALSE	FALSE	FALSE	FALSE	FALSE	FALSE	FALSE	FALSE	FALSE	FALSE	FALSE	FALSE	FALSE	FALSE	FALSE	FALSE	1	1	1	1	1	1	1
138	Chobruchi (Tchobroutchi)	7.3	7.8		FALSE	FALSE	FALSE	FALSE	FALSE	FALSE	FALSE	FALSE	FALSE	FALSE	FALSE	FALSE	FALSE	FALSE	FALSE	FALSE	FALSE	FALSE	FALSE	FALSE	FALSE	FALSE	FALSE	FALSE	FALSE	FALSE	FALSE	FALSE	FALSE	FALSE	FALSE	FALSE	FALSE	1	1	1	1	1	1	FALSE	FALSE	FALSE	FALSE	FALSE	FALSE
139	Varnitsa	9.7	11.1		FALSE	FALSE	FALSE	FALSE	FALSE	FALSE	FALSE	FALSE	FALSE	FALSE	FALSE	FALSE	FALSE	FALSE	FALSE	FALSE	FALSE	FALSE	FALSE	FALSE	FALSE	FALSE	FALSE	FALSE	FALSE	FALSE	FALSE	FALSE	FALSE	FALSE	FALSE	FALSE	FALSE	FALSE	FALSE	FALSE	FALSE	FALSE	FALSE	FALSE	FALSE	FALSE	FALSE	FALSE	FALSE
140	Westhofen	9.7	11.1		FALSE	FALSE	FALSE	FALSE	FALSE	FALSE	FALSE	FALSE	FALSE	FALSE	FALSE	FALSE	FALSE	FALSE	FALSE	FALSE	FALSE	FALSE	FALSE	FALSE	FALSE	FALSE	FALSE	FALSE	FALSE	FALSE	FALSE	FALSE	FALSE	FALSE	FALSE	FALSE	FALSE	FALSE	FALSE	FALSE	FALSE	FALSE	FALSE	FALSE	FALSE	FALSE	FALSE	FALSE	FALSE
141	Wien 3	9.7	11.1		FALSE	FALSE	FALSE	FALSE	FALSE	FALSE	FALSE	FALSE	FALSE	FALSE	FALSE	FALSE	FALSE	FALSE	FALSE	FALSE	FALSE	FALSE	FALSE	FALSE	FALSE	FALSE	FALSE	FALSE	FALSE	FALSE	FALSE	FALSE	FALSE	FALSE	FALSE	FALSE	FALSE	FALSE	FALSE	FALSE	FALSE	FALSE	FALSE	FALSE	FALSE	FALSE	FALSE	FALSE	FALSE
142	Wien 10	9.7	11.1		FALSE	FALSE	FALSE	FALSE	FALSE	FALSE	FALSE	FALSE	FALSE	FALSE	FALSE	FALSE	FALSE	FALSE	FALSE	FALSE	FALSE	FALSE	FALSE	FALSE	FALSE	FALSE	FALSE	FALSE	FALSE	FALSE	FALSE	FALSE	FALSE	FALSE	FALSE	FALSE	FALSE	FALSE	FALSE	FALSE	FALSE	FALSE	FALSE	FALSE	FALSE	FALSE	FALSE	FALSE	FALSE
143	Wien 12	9.7	11.1		FALSE	FALSE	FALSE	FALSE	FALSE	FALSE	FALSE	FALSE	FALSE	FALSE	FALSE	FALSE	FALSE	FALSE	FALSE	FALSE	FALSE	FALSE	FALSE	FALSE	FALSE	FALSE	FALSE	FALSE	FALSE	FALSE	FALSE	FALSE	FALSE	FALSE	FALSE	FALSE	FALSE	FALSE	FALSE	FALSE	FALSE	FALSE	FALSE	FALSE	FALSE	FALSE	FALSE	FALSE	FALSE
144	Zistersdorf	9.7	11.1		FALSE	FALSE	FALSE	FALSE	FALSE	FALSE	FALSE	FALSE	FALSE	FALSE	FALSE	FALSE	FALSE	FALSE	FALSE	FALSE	FALSE	FALSE	FALSE	FALSE	FALSE	FALSE	FALSE	FALSE	FALSE	FALSE	FALSE	FALSE	FALSE	FALSE	FALSE	FALSE	FALSE	FALSE	FALSE	FALSE	FALSE	FALSE	FALSE	FALSE	FALSE	FALSE	FALSE	FALSE	FALSE
145	Giggenhausen	9.7	11.1		FALSE	FALSE	FALSE	FALSE	FALSE	FALSE	FALSE	FALSE	FALSE	FALSE	FALSE	FALSE	FALSE	FALSE	FALSE	FALSE	FALSE	FALSE	FALSE	FALSE	FALSE	FALSE	FALSE	FALSE	FALSE	FALSE	FALSE	FALSE	FALSE	FALSE	FALSE	FALSE	FALSE	FALSE	FALSE	FALSE	FALSE	FALSE	FALSE	FALSE	FALSE	FALSE	FALSE	FALSE	FALSE
146	Nebelbergweg	9.7	11.1		FALSE	FALSE	FALSE	FALSE	FALSE	FALSE	FALSE	FALSE	FALSE	FALSE	FALSE	FALSE	FALSE	FALSE	FALSE	FALSE	FALSE	FALSE	FALSE	FALSE	FALSE	FALSE	FALSE	FALSE	FALSE	FALSE	FALSE	FALSE	FALSE	FALSE	FALSE	FALSE	FALSE	FALSE	FALSE	FALSE	FALSE	FALSE	FALSE	FALSE	FALSE	FALSE	FALSE	FALSE	FALSE
147	La Roma 2	8.7	9.7		FALSE	FALSE	FALSE	FALSE	FALSE	FALSE	FALSE	FALSE	FALSE	FALSE	FALSE	FALSE	FALSE	FALSE	FALSE	FALSE	FALSE	FALSE	FALSE	FALSE	FALSE	FALSE	FALSE	FALSE	FALSE	FALSE	FALSE	FALSE	FALSE	FALSE	FALSE	FALSE	FALSE	FALSE	FALSE	FALSE	FALSE	FALSE	FALSE	FALSE	FALSE	FALSE	FALSE	FALSE	FALSE
148	Milagros	4.9	7.3		FALSE	FALSE	FALSE	FALSE	FALSE	FALSE	FALSE	FALSE	FALSE	2	2	2	2	1	1	1	1	1	1	1	1	1	1	1	1	1	1	1	1	1	1	1	1	1	FALSE	FALSE	FALSE	FALSE	FALSE	FALSE	FALSE	FALSE	FALSE	FALSE	FALSE
149	Molayan	7.3	7.8		FALSE	FALSE	FALSE	FALSE	FALSE	FALSE	FALSE	FALSE	FALSE	FALSE	FALSE	FALSE	FALSE	FALSE	FALSE	FALSE	FALSE	FALSE	FALSE	FALSE	FALSE	FALSE	FALSE	FALSE	FALSE	FALSE	FALSE	FALSE	FALSE	FALSE	FALSE	FALSE	FALSE	1	1	1	1	1	1	FALSE	FALSE	FALSE	FALSE	FALSE	FALSE
150	Kalfa	9.7	11.1		FALSE	FALSE	FALSE	FALSE	FALSE	FALSE	FALSE	FALSE	FALSE	FALSE	FALSE	FALSE	FALSE	FALSE	FALSE	FALSE	FALSE	FALSE	FALSE	FALSE	FALSE	FALSE	FALSE	FALSE	FALSE	FALSE	FALSE	FALSE	FALSE	FALSE	FALSE	FALSE	FALSE	FALSE	FALSE	FALSE	FALSE	FALSE	FALSE	FALSE	FALSE	FALSE	FALSE	FALSE	FALSE
151	Grosslappen (Flinz)	9.7	11.1		FALSE	FALSE	FALSE	FALSE	FALSE	FALSE	FALSE	FALSE	FALSE	FALSE	FALSE	FALSE	FALSE	FALSE	FALSE	FALSE	FALSE	FALSE	FALSE	FALSE	FALSE	FALSE	FALSE	FALSE	FALSE	FALSE	FALSE	FALSE	FALSE	FALSE	FALSE	FALSE	FALSE	FALSE	FALSE	FALSE	FALSE	FALSE	FALSE	FALSE	FALSE	FALSE	FALSE	FALSE	FALSE
152	Hammerschmiede	9.7	11.1		FALSE	FALSE	FALSE	FALSE	FALSE	FALSE	FALSE	FALSE	FALSE	FALSE	FALSE	FALSE	FALSE	FALSE	FALSE	FALSE	FALSE	FALSE	FALSE	FALSE	FALSE	FALSE	FALSE	FALSE	FALSE	FALSE	FALSE	FALSE	FALSE	FALSE	FALSE	FALSE	FALSE	FALSE	FALSE	FALSE	FALSE	FALSE	FALSE	FALSE	FALSE	FALSE	FALSE	FALSE	FALSE
153	Breitenbrunn	9.7	11.1		FALSE	FALSE	FALSE	FALSE	FALSE	FALSE	FALSE	FALSE	FALSE	FALSE	FALSE	FALSE	FALSE	FALSE	FALSE	FALSE	FALSE	FALSE	FALSE	FALSE	FALSE	FALSE	FALSE	FALSE	FALSE	FALSE	FALSE	FALSE	FALSE	FALSE	FALSE	FALSE	FALSE	FALSE	FALSE	FALSE	FALSE	FALSE	FALSE	FALSE	FALSE	FALSE	FALSE	FALSE	FALSE
154	Charmoille	9.7	11.1		FALSE	FALSE	FALSE	FALSE	FALSE	FALSE	FALSE	FALSE	FALSE	FALSE	FALSE	FALSE	FALSE	FALSE	FALSE	FALSE	FALSE	FALSE	FALSE	FALSE	FALSE	FALSE	FALSE	FALSE	FALSE	FALSE	FALSE	FALSE	FALSE	FALSE	FALSE	FALSE	FALSE	FALSE	FALSE	FALSE	FALSE	FALSE	FALSE	FALSE	FALSE	FALSE	FALSE	FALSE	FALSE
155	Vösendorf	9.7	11.1		FALSE	FALSE	FALSE	FALSE	FALSE	FALSE	FALSE	FALSE	FALSE	FALSE	FALSE	FALSE	FALSE	FALSE	FALSE	FALSE	FALSE	FALSE	FALSE	FALSE	FALSE	FALSE	FALSE	FALSE	FALSE	FALSE	FALSE	FALSE	FALSE	FALSE	FALSE	FALSE	FALSE	FALSE	FALSE	FALSE	FALSE	FALSE	FALSE	FALSE	FALSE	FALSE	FALSE	FALSE	FALSE
156	Berislav	8.7	9.7		FALSE	FALSE	FALSE	FALSE	FALSE	FALSE	FALSE	FALSE	FALSE	FALSE	FALSE	FALSE	FALSE	FALSE	FALSE	FALSE	FALSE	FALSE	FALSE	FALSE	FALSE	FALSE	FALSE	FALSE	FALSE	FALSE	FALSE	FALSE	FALSE	FALSE	FALSE	FALSE	FALSE	FALSE	FALSE	FALSE	FALSE	FALSE	FALSE	FALSE	FALSE	FALSE	FALSE	FALSE	FALSE
157	Eldari I	9.7	11.1		FALSE	FALSE	FALSE	FALSE	FALSE	FALSE	FALSE	FALSE	FALSE	FALSE	FALSE	FALSE	FALSE	FALSE	FALSE	FALSE	FALSE	FALSE	FALSE	FALSE	FALSE	FALSE	FALSE	FALSE	FALSE	FALSE	FALSE	FALSE	FALSE	FALSE	FALSE	FALSE	FALSE	FALSE	FALSE	FALSE	FALSE	FALSE	FALSE	FALSE	FALSE	FALSE	FALSE	FALSE	FALSE
158	Grossulovo	8.7	9.7		FALSE	FALSE	FALSE	FALSE	FALSE	FALSE	FALSE	FALSE	FALSE	FALSE	FALSE	FALSE	FALSE	FALSE	FALSE	FALSE	FALSE	FALSE	FALSE	FALSE	FALSE	FALSE	FALSE	FALSE	FALSE	FALSE	FALSE	FALSE	FALSE	FALSE	FALSE	FALSE	FALSE	FALSE	FALSE	FALSE	FALSE	FALSE	FALSE	FALSE	FALSE	FALSE	FALSE	FALSE	FALSE
159	Stratzing	8.7	9.7		FALSE	FALSE	FALSE	FALSE	FALSE	FALSE	FALSE	FALSE	FALSE	FALSE	FALSE	FALSE	FALSE	FALSE	FALSE	FALSE	FALSE	FALSE	FALSE	FALSE	FALSE	FALSE	FALSE	FALSE	FALSE	FALSE	FALSE	FALSE	FALSE	FALSE	FALSE	FALSE	FALSE	FALSE	FALSE	FALSE	FALSE	FALSE	FALSE	FALSE	FALSE	FALSE	FALSE	FALSE	FALSE
160	Taraklia	7.3	7.8		FALSE	FALSE	FALSE	FALSE	FALSE	FALSE	FALSE	FALSE	FALSE	FALSE	FALSE	FALSE	FALSE	FALSE	FALSE	FALSE	FALSE	FALSE	FALSE	FALSE	FALSE	FALSE	FALSE	FALSE	FALSE	FALSE	FALSE	FALSE	FALSE	FALSE	FALSE	FALSE	FALSE	1	1	1	1	1	1	FALSE	FALSE	FALSE	FALSE	FALSE	FALSE
161	Kerassia	7.3	7.8		FALSE	FALSE	FALSE	FALSE	FALSE	FALSE	FALSE	FALSE	FALSE	FALSE	FALSE	FALSE	FALSE	FALSE	FALSE	FALSE	FALSE	FALSE	FALSE	FALSE	FALSE	FALSE	FALSE	FALSE	FALSE	FALSE	FALSE	FALSE	FALSE	FALSE	FALSE	FALSE	FALSE	1	1	1	1	1	1	FALSE	FALSE	FALSE	FALSE	FALSE	FALSE
162	Tudorovo	7.3	7.8		FALSE	FALSE	FALSE	FALSE	FALSE	FALSE	FALSE	FALSE	FALSE	FALSE	FALSE	FALSE	FALSE	FALSE	FALSE	FALSE	FALSE	FALSE	FALSE	FALSE	FALSE	FALSE	FALSE	FALSE	FALSE	FALSE	FALSE	FALSE	FALSE	FALSE	FALSE	FALSE	FALSE	1	1	1	1	1	1	FALSE	FALSE	FALSE	FALSE	FALSE	FALSE
163	Csákvár	7.8	8.7		FALSE	FALSE	FALSE	FALSE	FALSE	FALSE	FALSE	FALSE	FALSE	FALSE	FALSE	FALSE	FALSE	FALSE	FALSE	FALSE	FALSE	FALSE	FALSE	FALSE	FALSE	FALSE	FALSE	FALSE	FALSE	FALSE	FALSE	FALSE	FALSE	FALSE	FALSE	FALSE	FALSE	FALSE	FALSE	FALSE	FALSE	FALSE	1	1	1	1	1	1	1
164	Gaiselberg	9.7	11.1		FALSE	FALSE	FALSE	FALSE	FALSE	FALSE	FALSE	FALSE	FALSE	FALSE	FALSE	FALSE	FALSE	FALSE	FALSE	FALSE	FALSE	FALSE	FALSE	FALSE	FALSE	FALSE	FALSE	FALSE	FALSE	FALSE	FALSE	FALSE	FALSE	FALSE	FALSE	FALSE	FALSE	FALSE	FALSE	FALSE	FALSE	FALSE	FALSE	FALSE	FALSE	FALSE	FALSE	FALSE	FALSE
165	Nikiti 1 (NKT)	7.8	8.7		FALSE	FALSE	FALSE	FALSE	FALSE	FALSE	FALSE	FALSE	FALSE	FALSE	FALSE	FALSE	FALSE	FALSE	FALSE	FALSE	FALSE	FALSE	FALSE	FALSE	FALSE	FALSE	FALSE	FALSE	FALSE	FALSE	FALSE	FALSE	FALSE	FALSE	FALSE	FALSE	FALSE	FALSE	FALSE	FALSE	FALSE	FALSE	1	1	1	1	1	1	1
166	Saint Arnaud	4.9	7.3		FALSE	FALSE	FALSE	FALSE	FALSE	FALSE	FALSE	FALSE	FALSE	2	2	2	2	1	1	1	1	1	1	1	1	1	1	1	1	1	1	1	1	1	1	1	1	1	FALSE	FALSE	FALSE	FALSE	FALSE	FALSE	FALSE	FALSE	FALSE	FALSE	FALSE
167	Sahabi	4.9	7.3		FALSE	FALSE	FALSE	FALSE	FALSE	FALSE	FALSE	FALSE	FALSE	2	2	2	2	1	1	1	1	1	1	1	1	1	1	1	1	1	1	1	1	1	1	1	1	1	FALSE	FALSE	FALSE	FALSE	FALSE	FALSE	FALSE	FALSE	FALSE	FALSE	FALSE
168	Middle Maragheh	7.3	7.8		FALSE	FALSE	FALSE	FALSE	FALSE	FALSE	FALSE	FALSE	FALSE	FALSE	FALSE	FALSE	FALSE	FALSE	FALSE	FALSE	FALSE	FALSE	FALSE	FALSE	FALSE	FALSE	FALSE	FALSE	FALSE	FALSE	FALSE	FALSE	FALSE	FALSE	FALSE	FALSE	FALSE	1	1	1	1	1	1	FALSE	FALSE	FALSE	FALSE	FALSE	FALSE
169	Lower Maragheh	7.8	8.7		FALSE	FALSE	FALSE	FALSE	FALSE	FALSE	FALSE	FALSE	FALSE	FALSE	FALSE	FALSE	FALSE	FALSE	FALSE	FALSE	FALSE	FALSE	FALSE	FALSE	FALSE	FALSE	FALSE	FALSE	FALSE	FALSE	FALSE	FALSE	FALSE	FALSE	FALSE	FALSE	FALSE	FALSE	FALSE	FALSE	FALSE	FALSE	1	1	1	1	1	1	1
170	Prochoma	7.3	7.8		FALSE	FALSE	FALSE	FALSE	FALSE	FALSE	FALSE	FALSE	FALSE	FALSE	FALSE	FALSE	FALSE	FALSE	FALSE	FALSE	FALSE	FALSE	FALSE	FALSE	FALSE	FALSE	FALSE	FALSE	FALSE	FALSE	FALSE	FALSE	FALSE	FALSE	FALSE	FALSE	FALSE	1	1	1	1	1	1	FALSE	FALSE	FALSE	FALSE	FALSE	FALSE
171	Upper Maragheh	7.3	7.8		FALSE	FALSE	FALSE	FALSE	FALSE	FALSE	FALSE	FALSE	FALSE	FALSE	FALSE	FALSE	FALSE	FALSE	FALSE	FALSE	FALSE	FALSE	FALSE	FALSE	FALSE	FALSE	FALSE	FALSE	FALSE	FALSE	FALSE	FALSE	FALSE	FALSE	FALSE	FALSE	FALSE	1	1	1	1	1	1	FALSE	FALSE	FALSE	FALSE	FALSE	FALSE
172	Novo-Elizavetovka	7.3	7.8		FALSE	FALSE	FALSE	FALSE	FALSE	FALSE	FALSE	FALSE	FALSE	FALSE	FALSE	FALSE	FALSE	FALSE	FALSE	FALSE	FALSE	FALSE	FALSE	FALSE	FALSE	FALSE	FALSE	FALSE	FALSE	FALSE	FALSE	FALSE	FALSE	FALSE	FALSE	FALSE	FALSE	1	1	1	1	1	1	FALSE	FALSE	FALSE	FALSE	FALSE	FALSE
173	Kemiklitepe A-B	7.3	7.8		FALSE	FALSE	FALSE	FALSE	FALSE	FALSE	FALSE	FALSE	FALSE	FALSE	FALSE	FALSE	FALSE	FALSE	FALSE	FALSE	FALSE	FALSE	FALSE	FALSE	FALSE	FALSE	FALSE	FALSE	FALSE	FALSE	FALSE	FALSE	FALSE	FALSE	FALSE	FALSE	FALSE	1	1	1	1	1	1	FALSE	FALSE	FALSE	FALSE	FALSE	FALSE
174	Kemiklitepe D	7.8	8.7		FALSE	FALSE	FALSE	FALSE	FALSE	FALSE	FALSE	FALSE	FALSE	FALSE	FALSE	FALSE	FALSE	FALSE	FALSE	FALSE	FALSE	FALSE	FALSE	FALSE	FALSE	FALSE	FALSE	FALSE	FALSE	FALSE	FALSE	FALSE	FALSE	FALSE	FALSE	FALSE	FALSE	FALSE	FALSE	FALSE	FALSE	FALSE	1	1	1	1	1	1	1
175	Pavlodar	4.9	7.3		FALSE	FALSE	FALSE	FALSE	FALSE	FALSE	FALSE	FALSE	FALSE	2	2	2	2	1	1	1	1	1	1	1	1	1	1	1	1	1	1	1	1	1	1	1	1	1	FALSE	FALSE	FALSE	FALSE	FALSE	FALSE	FALSE	FALSE	FALSE	FALSE	FALSE
176	Samos Old Mill Beds	7.3	7.8		FALSE	FALSE	FALSE	FALSE	FALSE	FALSE	FALSE	FALSE	FALSE	FALSE	FALSE	FALSE	FALSE	FALSE	FALSE	FALSE	FALSE	FALSE	FALSE	FALSE	FALSE	FALSE	FALSE	FALSE	FALSE	FALSE	FALSE	FALSE	FALSE	FALSE	FALSE	FALSE	FALSE	1	1	1	1	1	1	FALSE	FALSE	FALSE	FALSE	FALSE	FALSE
177	Samos White Sands	7.3	7.8		FALSE	FALSE	FALSE	FALSE	FALSE	FALSE	FALSE	FALSE	FALSE	FALSE	FALSE	FALSE	FALSE	FALSE	FALSE	FALSE	FALSE	FALSE	FALSE	FALSE	FALSE	FALSE	FALSE	FALSE	FALSE	FALSE	FALSE	FALSE	FALSE	FALSE	FALSE	FALSE	FALSE	1	1	1	1	1	1	FALSE	FALSE	FALSE	FALSE	FALSE	FALSE
178	Samos Main Bone Beds	7.3	7.8		FALSE	FALSE	FALSE	FALSE	FALSE	FALSE	FALSE	FALSE	FALSE	FALSE	FALSE	FALSE	FALSE	FALSE	FALSE	FALSE	FALSE	FALSE	FALSE	FALSE	FALSE	FALSE	FALSE	FALSE	FALSE	FALSE	FALSE	FALSE	FALSE	FALSE	FALSE	FALSE	FALSE	1	1	1	1	1	1	FALSE	FALSE	FALSE	FALSE	FALSE	FALSE
179	Las Pedrizas	7.3	7.8		FALSE	FALSE	FALSE	FALSE	FALSE	FALSE	FALSE	FALSE	FALSE	FALSE	FALSE	FALSE	FALSE	FALSE	FALSE	FALSE	FALSE	FALSE	FALSE	FALSE	FALSE	FALSE	FALSE	FALSE	FALSE	FALSE	FALSE	FALSE	FALSE	FALSE	FALSE	FALSE	FALSE	1	1	1	1	1	1	FALSE	FALSE	FALSE	FALSE	FALSE	FALSE
180	Subsol de Sabadell	9.7	11.1		FALSE	FALSE	FALSE	FALSE	FALSE	FALSE	FALSE	FALSE	FALSE	FALSE	FALSE	FALSE	FALSE	FALSE	FALSE	FALSE	FALSE	FALSE	FALSE	FALSE	FALSE	FALSE	FALSE	FALSE	FALSE	FALSE	FALSE	FALSE	FALSE	FALSE	FALSE	FALSE	FALSE	FALSE	FALSE	FALSE	FALSE	FALSE	FALSE	FALSE	FALSE	FALSE	FALSE	FALSE	FALSE
181	Sant Miquel de Taudell	9.7	11.1		FALSE	FALSE	FALSE	FALSE	FALSE	FALSE	FALSE	FALSE	FALSE	FALSE	FALSE	FALSE	FALSE	FALSE	FALSE	FALSE	FALSE	FALSE	FALSE	FALSE	FALSE	FALSE	FALSE	FALSE	FALSE	FALSE	FALSE	FALSE	FALSE	FALSE	FALSE	FALSE	FALSE	FALSE	FALSE	FALSE	FALSE	FALSE	FALSE	FALSE	FALSE	FALSE	FALSE	FALSE	FALSE
182	El Firal	9.7	11.1		FALSE	FALSE	FALSE	FALSE	FALSE	FALSE	FALSE	FALSE	FALSE	FALSE	FALSE	FALSE	FALSE	FALSE	FALSE	FALSE	FALSE	FALSE	FALSE	FALSE	FALSE	FALSE	FALSE	FALSE	FALSE	FALSE	FALSE	FALSE	FALSE	FALSE	FALSE	FALSE	FALSE	FALSE	FALSE	FALSE	FALSE	FALSE	FALSE	FALSE	FALSE	FALSE	FALSE	FALSE	FALSE
183	Sinap 1	8.7	9.7		FALSE	FALSE	FALSE	FALSE	FALSE	FALSE	FALSE	FALSE	FALSE	FALSE	FALSE	FALSE	FALSE	FALSE	FALSE	FALSE	FALSE	FALSE	FALSE	FALSE	FALSE	FALSE	FALSE	FALSE	FALSE	FALSE	FALSE	FALSE	FALSE	FALSE	FALSE	FALSE	FALSE	FALSE	FALSE	FALSE	FALSE	FALSE	FALSE	FALSE	FALSE	FALSE	FALSE	FALSE	FALSE
184	Sinap 4	9.7	11.1		FALSE	FALSE	FALSE	FALSE	FALSE	FALSE	FALSE	FALSE	FALSE	FALSE	FALSE	FALSE	FALSE	FALSE	FALSE	FALSE	FALSE	FALSE	FALSE	FALSE	FALSE	FALSE	FALSE	FALSE	FALSE	FALSE	FALSE	FALSE	FALSE	FALSE	FALSE	FALSE	FALSE	FALSE	FALSE	FALSE	FALSE	FALSE	FALSE	FALSE	FALSE	FALSE	FALSE	FALSE	FALSE
185	Sinap 8A	9.7	11.1		FALSE	FALSE	FALSE	FALSE	FALSE	FALSE	FALSE	FALSE	FALSE	FALSE	FALSE	FALSE	FALSE	FALSE	FALSE	FALSE	FALSE	FALSE	FALSE	FALSE	FALSE	FALSE	FALSE	FALSE	FALSE	FALSE	FALSE	FALSE	FALSE	FALSE	FALSE	FALSE	FALSE	FALSE	FALSE	FALSE	FALSE	FALSE	FALSE	FALSE	FALSE	FALSE	FALSE	FALSE	FALSE
186	Sinap 12	8.7	9.7		FALSE	FALSE	FALSE	FALSE	FALSE	FALSE	FALSE	FALSE	FALSE	FALSE	FALSE	FALSE	FALSE	FALSE	FALSE	FALSE	FALSE	FALSE	FALSE	FALSE	FALSE	FALSE	FALSE	FALSE	FALSE	FALSE	FALSE	FALSE	FALSE	FALSE	FALSE	FALSE	FALSE	FALSE	FALSE	FALSE	FALSE	FALSE	FALSE	FALSE	FALSE	FALSE	FALSE	FALSE	FALSE
187	Sinap 14	9.7	11.1		FALSE	FALSE	FALSE	FALSE	FALSE	FALSE	FALSE	FALSE	FALSE	FALSE	FALSE	FALSE	FALSE	FALSE	FALSE	FALSE	FALSE	FALSE	FALSE	FALSE	FALSE	FALSE	FALSE	FALSE	FALSE	FALSE	FALSE	FALSE	FALSE	FALSE	FALSE	FALSE	FALSE	FALSE	FALSE	FALSE	FALSE	FALSE	FALSE	FALSE	FALSE	FALSE	FALSE	FALSE	FALSE
188	Sinap 26	7.3	7.8		FALSE	FALSE	FALSE	FALSE	FALSE	FALSE	FALSE	FALSE	FALSE	FALSE	FALSE	FALSE	FALSE	FALSE	FALSE	FALSE	FALSE	FALSE	FALSE	FALSE	FALSE	FALSE	FALSE	FALSE	FALSE	FALSE	FALSE	FALSE	FALSE	FALSE	FALSE	FALSE	FALSE	1	1	1	1	1	1	FALSE	FALSE	FALSE	FALSE	FALSE	FALSE
189	Sinap 27	7.3	7.8		FALSE	FALSE	FALSE	FALSE	FALSE	FALSE	FALSE	FALSE	FALSE	FALSE	FALSE	FALSE	FALSE	FALSE	FALSE	FALSE	FALSE	FALSE	FALSE	FALSE	FALSE	FALSE	FALSE	FALSE	FALSE	FALSE	FALSE	FALSE	FALSE	FALSE	FALSE	FALSE	FALSE	1	1	1	1	1	1	FALSE	FALSE	FALSE	FALSE	FALSE	FALSE
190	Sinap 33	7.3	7.8		FALSE	FALSE	FALSE	FALSE	FALSE	FALSE	FALSE	FALSE	FALSE	FALSE	FALSE	FALSE	FALSE	FALSE	FALSE	FALSE	FALSE	FALSE	FALSE	FALSE	FALSE	FALSE	FALSE	FALSE	FALSE	FALSE	FALSE	FALSE	FALSE	FALSE	FALSE	FALSE	FALSE	1	1	1	1	1	1	FALSE	FALSE	FALSE	FALSE	FALSE	FALSE
191	Sinap 34	7.8	8.7		FALSE	FALSE	FALSE	FALSE	FALSE	FALSE	FALSE	FALSE	FALSE	FALSE	FALSE	FALSE	FALSE	FALSE	FALSE	FALSE	FALSE	FALSE	FALSE	FALSE	FALSE	FALSE	FALSE	FALSE	FALSE	FALSE	FALSE	FALSE	FALSE	FALSE	FALSE	FALSE	FALSE	FALSE	FALSE	FALSE	FALSE	FALSE	1	1	1	1	1	1	1
192	Sinap 45	9.7	11.1		FALSE	FALSE	FALSE	FALSE	FALSE	FALSE	FALSE	FALSE	FALSE	FALSE	FALSE	FALSE	FALSE	FALSE	FALSE	FALSE	FALSE	FALSE	FALSE	FALSE	FALSE	FALSE	FALSE	FALSE	FALSE	FALSE	FALSE	FALSE	FALSE	FALSE	FALSE	FALSE	FALSE	FALSE	FALSE	FALSE	FALSE	FALSE	FALSE	FALSE	FALSE	FALSE	FALSE	FALSE	FALSE
193	Sinap 49	8.7	9.7		FALSE	FALSE	FALSE	FALSE	FALSE	FALSE	FALSE	FALSE	FALSE	FALSE	FALSE	FALSE	FALSE	FALSE	FALSE	FALSE	FALSE	FALSE	FALSE	FALSE	FALSE	FALSE	FALSE	FALSE	FALSE	FALSE	FALSE	FALSE	FALSE	FALSE	FALSE	FALSE	FALSE	FALSE	FALSE	FALSE	FALSE	FALSE	FALSE	FALSE	FALSE	FALSE	FALSE	FALSE	FALSE
194	Sinap 51	9.7	11.1		FALSE	FALSE	FALSE	FALSE	FALSE	FALSE	FALSE	FALSE	FALSE	FALSE	FALSE	FALSE	FALSE	FALSE	FALSE	FALSE	FALSE	FALSE	FALSE	FALSE	FALSE	FALSE	FALSE	FALSE	FALSE	FALSE	FALSE	FALSE	FALSE	FALSE	FALSE	FALSE	FALSE	FALSE	FALSE	FALSE	FALSE	FALSE	FALSE	FALSE	FALSE	FALSE	FALSE	FALSE	FALSE
195	Sinap 63	7.8	8.7		FALSE	FALSE	FALSE	FALSE	FALSE	FALSE	FALSE	FALSE	FALSE	FALSE	FALSE	FALSE	FALSE	FALSE	FALSE	FALSE	FALSE	FALSE	FALSE	FALSE	FALSE	FALSE	FALSE	FALSE	FALSE	FALSE	FALSE	FALSE	FALSE	FALSE	FALSE	FALSE	FALSE	FALSE	FALSE	FALSE	FALSE	FALSE	1	1	1	1	1	1	1
196	Sinap 64	9.7	11.1		FALSE	FALSE	FALSE	FALSE	FALSE	FALSE	FALSE	FALSE	FALSE	FALSE	FALSE	FALSE	FALSE	FALSE	FALSE	FALSE	FALSE	FALSE	FALSE	FALSE	FALSE	FALSE	FALSE	FALSE	FALSE	FALSE	FALSE	FALSE	FALSE	FALSE	FALSE	FALSE	FALSE	FALSE	FALSE	FALSE	FALSE	FALSE	FALSE	FALSE	FALSE	FALSE	FALSE	FALSE	FALSE
197	Sinap 72	9.7	11.1		FALSE	FALSE	FALSE	FALSE	FALSE	FALSE	FALSE	FALSE	FALSE	FALSE	FALSE	FALSE	FALSE	FALSE	FALSE	FALSE	FALSE	FALSE	FALSE	FALSE	FALSE	FALSE	FALSE	FALSE	FALSE	FALSE	FALSE	FALSE	FALSE	FALSE	FALSE	FALSE	FALSE	FALSE	FALSE	FALSE	FALSE	FALSE	FALSE	FALSE	FALSE	FALSE	FALSE	FALSE	FALSE
198	Sinap 91	9.7	11.1		FALSE	FALSE	FALSE	FALSE	FALSE	FALSE	FALSE	FALSE	FALSE	FALSE	FALSE	FALSE	FALSE	FALSE	FALSE	FALSE	FALSE	FALSE	FALSE	FALSE	FALSE	FALSE	FALSE	FALSE	FALSE	FALSE	FALSE	FALSE	FALSE	FALSE	FALSE	FALSE	FALSE	FALSE	FALSE	FALSE	FALSE	FALSE	FALSE	FALSE	FALSE	FALSE	FALSE	FALSE	FALSE
199	Sinap 94	9.7	11.1		FALSE	FALSE	FALSE	FALSE	FALSE	FALSE	FALSE	FALSE	FALSE	FALSE	FALSE	FALSE	FALSE	FALSE	FALSE	FALSE	FALSE	FALSE	FALSE	FALSE	FALSE	FALSE	FALSE	FALSE	FALSE	FALSE	FALSE	FALSE	FALSE	FALSE	FALSE	FALSE	FALSE	FALSE	FALSE	FALSE	FALSE	FALSE	FALSE	FALSE	FALSE	FALSE	FALSE	FALSE	FALSE
200	Sinap 108	9.7	11.1		FALSE	FALSE	FALSE	FALSE	FALSE	FALSE	FALSE	FALSE	FALSE	FALSE	FALSE	FALSE	FALSE	FALSE	FALSE	FALSE	FALSE	FALSE	FALSE	FALSE	FALSE	FALSE	FALSE	FALSE	FALSE	FALSE	FALSE	FALSE	FALSE	FALSE	FALSE	FALSE	FALSE	FALSE	FALSE	FALSE	FALSE	FALSE	FALSE	FALSE	FALSE	FALSE	FALSE	FALSE	FALSE
201	Sinap 40	9.7	11.1		FALSE	FALSE	FALSE	FALSE	FALSE	FALSE	FALSE	FALSE	FALSE	FALSE	FALSE	FALSE	FALSE	FALSE	FALSE	FALSE	FALSE	FALSE	FALSE	FALSE	FALSE	FALSE	FALSE	FALSE	FALSE	FALSE	FALSE	FALSE	FALSE	FALSE	FALSE	FALSE	FALSE	FALSE	FALSE	FALSE	FALSE	FALSE	FALSE	FALSE	FALSE	FALSE	FALSE	FALSE	FALSE
202	Sinap 46	8.7	9.7		FALSE	FALSE	FALSE	FALSE	FALSE	FALSE	FALSE	FALSE	FALSE	FALSE	FALSE	FALSE	FALSE	FALSE	FALSE	FALSE	FALSE	FALSE	FALSE	FALSE	FALSE	FALSE	FALSE	FALSE	FALSE	FALSE	FALSE	FALSE	FALSE	FALSE	FALSE	FALSE	FALSE	FALSE	FALSE	FALSE	FALSE	FALSE	FALSE	FALSE	FALSE	FALSE	FALSE	FALSE	FALSE
203	Sinap 50	8.7	9.7		FALSE	FALSE	FALSE	FALSE	FALSE	FALSE	FALSE	FALSE	FALSE	FALSE	FALSE	FALSE	FALSE	FALSE	FALSE	FALSE	FALSE	FALSE	FALSE	FALSE	FALSE	FALSE	FALSE	FALSE	FALSE	FALSE	FALSE	FALSE	FALSE	FALSE	FALSE	FALSE	FALSE	FALSE	FALSE	FALSE	FALSE	FALSE	FALSE	FALSE	FALSE	FALSE	FALSE	FALSE	FALSE
204	Sinap 58	8.7	9.7		FALSE	FALSE	FALSE	FALSE	FALSE	FALSE	FALSE	FALSE	FALSE	FALSE	FALSE	FALSE	FALSE	FALSE	FALSE	FALSE	FALSE	FALSE	FALSE	FALSE	FALSE	FALSE	FALSE	FALSE	FALSE	FALSE	FALSE	FALSE	FALSE	FALSE	FALSE	FALSE	FALSE	FALSE	FALSE	FALSE	FALSE	FALSE	FALSE	FALSE	FALSE	FALSE	FALSE	FALSE	FALSE
205	Sinap 70	7.3	7.8		FALSE	FALSE	FALSE	FALSE	FALSE	FALSE	FALSE	FALSE	FALSE	FALSE	FALSE	FALSE	FALSE	FALSE	FALSE	FALSE	FALSE	FALSE	FALSE	FALSE	FALSE	FALSE	FALSE	FALSE	FALSE	FALSE	FALSE	FALSE	FALSE	FALSE	FALSE	FALSE	FALSE	1	1	1	1	1	1	FALSE	FALSE	FALSE	FALSE	FALSE	FALSE
206	Sinap 77	4.9	7.3		FALSE	FALSE	FALSE	FALSE	FALSE	FALSE	FALSE	FALSE	FALSE	2	2	2	2	1	1	1	1	1	1	1	1	1	1	1	1	1	1	1	1	1	1	1	1	1	FALSE	FALSE	FALSE	FALSE	FALSE	FALSE	FALSE	FALSE	FALSE	FALSE	FALSE
207	Sinap 78	4.9	7.3		FALSE	FALSE	FALSE	FALSE	FALSE	FALSE	FALSE	FALSE	FALSE	2	2	2	2	1	1	1	1	1	1	1	1	1	1	1	1	1	1	1	1	1	1	1	1	1	FALSE	FALSE	FALSE	FALSE	FALSE	FALSE	FALSE	FALSE	FALSE	FALSE	FALSE
208	Sinap 88	9.7	11.1		FALSE	FALSE	FALSE	FALSE	FALSE	FALSE	FALSE	FALSE	FALSE	FALSE	FALSE	FALSE	FALSE	FALSE	FALSE	FALSE	FALSE	FALSE	FALSE	FALSE	FALSE	FALSE	FALSE	FALSE	FALSE	FALSE	FALSE	FALSE	FALSE	FALSE	FALSE	FALSE	FALSE	FALSE	FALSE	FALSE	FALSE	FALSE	FALSE	FALSE	FALSE	FALSE	FALSE	FALSE	FALSE
209	Sinap 83	8.7	9.7		FALSE	FALSE	FALSE	FALSE	FALSE	FALSE	FALSE	FALSE	FALSE	FALSE	FALSE	FALSE	FALSE	FALSE	FALSE	FALSE	FALSE	FALSE	FALSE	FALSE	FALSE	FALSE	FALSE	FALSE	FALSE	FALSE	FALSE	FALSE	FALSE	FALSE	FALSE	FALSE	FALSE	FALSE	FALSE	FALSE	FALSE	FALSE	FALSE	FALSE	FALSE	FALSE	FALSE	FALSE	FALSE
210	Vivero de Pinos	7.8	8.7		FALSE	FALSE	FALSE	FALSE	FALSE	FALSE	FALSE	FALSE	FALSE	FALSE	FALSE	FALSE	FALSE	FALSE	FALSE	FALSE	FALSE	FALSE	FALSE	FALSE	FALSE	FALSE	FALSE	FALSE	FALSE	FALSE	FALSE	FALSE	FALSE	FALSE	FALSE	FALSE	FALSE	FALSE	FALSE	FALSE	FALSE	FALSE	1	1	1	1	1	1	1
211	Can Ponsic I	9.7	11.1		FALSE	FALSE	FALSE	FALSE	FALSE	FALSE	FALSE	FALSE	FALSE	FALSE	FALSE	FALSE	FALSE	FALSE	FALSE	FALSE	FALSE	FALSE	FALSE	FALSE	FALSE	FALSE	FALSE	FALSE	FALSE	FALSE	FALSE	FALSE	FALSE	FALSE	FALSE	FALSE	FALSE	FALSE	FALSE	FALSE	FALSE	FALSE	FALSE	FALSE	FALSE	FALSE	FALSE	FALSE	FALSE
212	Khirgis-Nur II-lower	4.9	7.3		FALSE	FALSE	FALSE	FALSE	FALSE	FALSE	FALSE	FALSE	FALSE	2	2	2	2	1	1	1	1	1	1	1	1	1	1	1	1	1	1	1	1	1	1	1	1	1	FALSE	FALSE	FALSE	FALSE	FALSE	FALSE	FALSE	FALSE	FALSE	FALSE	FALSE
213	Khirgis-Nur II-Altan-Teli	7.3	7.8		FALSE	FALSE	FALSE	FALSE	FALSE	FALSE	FALSE	FALSE	FALSE	FALSE	FALSE	FALSE	FALSE	FALSE	FALSE	FALSE	FALSE	FALSE	FALSE	FALSE	FALSE	FALSE	FALSE	FALSE	FALSE	FALSE	FALSE	FALSE	FALSE	FALSE	FALSE	FALSE	FALSE	1	1	1	1	1	1	FALSE	FALSE	FALSE	FALSE	FALSE	FALSE
214	Altan-Teli	7.8	8.7		FALSE	FALSE	FALSE	FALSE	FALSE	FALSE	FALSE	FALSE	FALSE	FALSE	FALSE	FALSE	FALSE	FALSE	FALSE	FALSE	FALSE	FALSE	FALSE	FALSE	FALSE	FALSE	FALSE	FALSE	FALSE	FALSE	FALSE	FALSE	FALSE	FALSE	FALSE	FALSE	FALSE	FALSE	FALSE	FALSE	FALSE	FALSE	1	1	1	1	1	1	1
215	Oshin-I-5 upper	9.7	11.1		FALSE	FALSE	FALSE	FALSE	FALSE	FALSE	FALSE	FALSE	FALSE	FALSE	FALSE	FALSE	FALSE	FALSE	FALSE	FALSE	FALSE	FALSE	FALSE	FALSE	FALSE	FALSE	FALSE	FALSE	FALSE	FALSE	FALSE	FALSE	FALSE	FALSE	FALSE	FALSE	FALSE	FALSE	FALSE	FALSE	FALSE	FALSE	FALSE	FALSE	FALSE	FALSE	FALSE	FALSE	FALSE
216	Qaidam-Tuosu	9.7	11.1		FALSE	FALSE	FALSE	FALSE	FALSE	FALSE	FALSE	FALSE	FALSE	FALSE	FALSE	FALSE	FALSE	FALSE	FALSE	FALSE	FALSE	FALSE	FALSE	FALSE	FALSE	FALSE	FALSE	FALSE	FALSE	FALSE	FALSE	FALSE	FALSE	FALSE	FALSE	FALSE	FALSE	FALSE	FALSE	FALSE	FALSE	FALSE	FALSE	FALSE	FALSE	FALSE	FALSE	FALSE	FALSE
217	Amuwusu	9.7	11.1		FALSE	FALSE	FALSE	FALSE	FALSE	FALSE	FALSE	FALSE	FALSE	FALSE	FALSE	FALSE	FALSE	FALSE	FALSE	FALSE	FALSE	FALSE	FALSE	FALSE	FALSE	FALSE	FALSE	FALSE	FALSE	FALSE	FALSE	FALSE	FALSE	FALSE	FALSE	FALSE	FALSE	FALSE	FALSE	FALSE	FALSE	FALSE	FALSE	FALSE	FALSE	FALSE	FALSE	FALSE	FALSE
218	Biru-Bulong	8.7	9.7		FALSE	FALSE	FALSE	FALSE	FALSE	FALSE	FALSE	FALSE	FALSE	FALSE	FALSE	FALSE	FALSE	FALSE	FALSE	FALSE	FALSE	FALSE	FALSE	FALSE	FALSE	FALSE	FALSE	FALSE	FALSE	FALSE	FALSE	FALSE	FALSE	FALSE	FALSE	FALSE	FALSE	FALSE	FALSE	FALSE	FALSE	FALSE	FALSE	FALSE	FALSE	FALSE	FALSE	FALSE	FALSE
219	Wuzhong-ganhegou	9.7	11.1		FALSE	FALSE	FALSE	FALSE	FALSE	FALSE	FALSE	FALSE	FALSE	FALSE	FALSE	FALSE	FALSE	FALSE	FALSE	FALSE	FALSE	FALSE	FALSE	FALSE	FALSE	FALSE	FALSE	FALSE	FALSE	FALSE	FALSE	FALSE	FALSE	FALSE	FALSE	FALSE	FALSE	FALSE	FALSE	FALSE	FALSE	FALSE	FALSE	FALSE	FALSE	FALSE	FALSE	FALSE	FALSE
220	Zhongning-ganhegou	9.7	11.1		FALSE	FALSE	FALSE	FALSE	FALSE	FALSE	FALSE	FALSE	FALSE	FALSE	FALSE	FALSE	FALSE	FALSE	FALSE	FALSE	FALSE	FALSE	FALSE	FALSE	FALSE	FALSE	FALSE	FALSE	FALSE	FALSE	FALSE	FALSE	FALSE	FALSE	FALSE	FALSE	FALSE	FALSE	FALSE	FALSE	FALSE	FALSE	FALSE	FALSE	FALSE	FALSE	FALSE	FALSE	FALSE
221	Sherullah 9	8.7	9.7		FALSE	FALSE	FALSE	FALSE	FALSE	FALSE	FALSE	FALSE	FALSE	FALSE	FALSE	FALSE	FALSE	FALSE	FALSE	FALSE	FALSE	FALSE	FALSE	FALSE	FALSE	FALSE	FALSE	FALSE	FALSE	FALSE	FALSE	FALSE	FALSE	FALSE	FALSE	FALSE	FALSE	FALSE	FALSE	FALSE	FALSE	FALSE	FALSE	FALSE	FALSE	FALSE	FALSE	FALSE	FALSE
222	Taghar	7.8	8.7		FALSE	FALSE	FALSE	FALSE	FALSE	FALSE	FALSE	FALSE	FALSE	FALSE	FALSE	FALSE	FALSE	FALSE	FALSE	FALSE	FALSE	FALSE	FALSE	FALSE	FALSE	FALSE	FALSE	FALSE	FALSE	FALSE	FALSE	FALSE	FALSE	FALSE	FALSE	FALSE	FALSE	FALSE	FALSE	FALSE	FALSE	FALSE	1	1	1	1	1	1	1
223	Sinap 114	9.7	11.1		FALSE	FALSE	FALSE	FALSE	FALSE	FALSE	FALSE	FALSE	FALSE	FALSE	FALSE	FALSE	FALSE	FALSE	FALSE	FALSE	FALSE	FALSE	FALSE	FALSE	FALSE	FALSE	FALSE	FALSE	FALSE	FALSE	FALSE	FALSE	FALSE	FALSE	FALSE	FALSE	FALSE	FALSE	FALSE	FALSE	FALSE	FALSE	FALSE	FALSE	FALSE	FALSE	FALSE	FALSE	FALSE
224	Oshin-II-5 upper	9.7	11.1		FALSE	FALSE	FALSE	FALSE	FALSE	FALSE	FALSE	FALSE	FALSE	FALSE	FALSE	FALSE	FALSE	FALSE	FALSE	FALSE	FALSE	FALSE	FALSE	FALSE	FALSE	FALSE	FALSE	FALSE	FALSE	FALSE	FALSE	FALSE	FALSE	FALSE	FALSE	FALSE	FALSE	FALSE	FALSE	FALSE	FALSE	FALSE	FALSE	FALSE	FALSE	FALSE	FALSE	FALSE	FALSE
225	Puy Courny	4.9	7.3		FALSE	FALSE	FALSE	FALSE	FALSE	FALSE	FALSE	FALSE	FALSE	2	2	2	2	1	1	1	1	1	1	1	1	1	1	1	1	1	1	1	1	1	1	1	1	1	FALSE	FALSE	FALSE	FALSE	FALSE	FALSE	FALSE	FALSE	FALSE	FALSE	FALSE
226	Arquillo 1	4.9	7.3		FALSE	FALSE	FALSE	FALSE	FALSE	FALSE	FALSE	FALSE	FALSE	2	2	2	2	1	1	1	1	1	1	1	1	1	1	1	1	1	1	1	1	1	1	1	1	1	FALSE	FALSE	FALSE	FALSE	FALSE	FALSE	FALSE	FALSE	FALSE	FALSE	FALSE
227	La Gloria 5	4.9	7.3		FALSE	FALSE	FALSE	FALSE	FALSE	FALSE	FALSE	FALSE	FALSE	2	2	2	2	1	1	1	1	1	1	1	1	1	1	1	1	1	1	1	1	1	1	1	1	1	FALSE	FALSE	FALSE	FALSE	FALSE	FALSE	FALSE	FALSE	FALSE	FALSE	FALSE
228	Rambla de Valdecebro 6	4.9	7.3		FALSE	FALSE	FALSE	FALSE	FALSE	FALSE	FALSE	FALSE	FALSE	2	2	2	2	1	1	1	1	1	1	1	1	1	1	1	1	1	1	1	1	1	1	1	1	1	FALSE	FALSE	FALSE	FALSE	FALSE	FALSE	FALSE	FALSE	FALSE	FALSE	FALSE
229	Rambla de Valdecebro 3	4.9	7.3		FALSE	FALSE	FALSE	FALSE	FALSE	FALSE	FALSE	FALSE	FALSE	2	2	2	2	1	1	1	1	1	1	1	1	1	1	1	1	1	1	1	1	1	1	1	1	1	FALSE	FALSE	FALSE	FALSE	FALSE	FALSE	FALSE	FALSE	FALSE	FALSE	FALSE
230	Bunker de Valdecebro	4.9	7.3		FALSE	FALSE	FALSE	FALSE	FALSE	FALSE	FALSE	FALSE	FALSE	2	2	2	2	1	1	1	1	1	1	1	1	1	1	1	1	1	1	1	1	1	1	1	1	1	FALSE	FALSE	FALSE	FALSE	FALSE	FALSE	FALSE	FALSE	FALSE	FALSE	FALSE
231	Rambla de Valdecebro 0	4.9	7.3		FALSE	FALSE	FALSE	FALSE	FALSE	FALSE	FALSE	FALSE	FALSE	2	2	2	2	1	1	1	1	1	1	1	1	1	1	1	1	1	1	1	1	1	1	1	1	1	FALSE	FALSE	FALSE	FALSE	FALSE	FALSE	FALSE	FALSE	FALSE	FALSE	FALSE
232	Kholobolochi Nor	4.9	7.3		FALSE	FALSE	FALSE	FALSE	FALSE	FALSE	FALSE	FALSE	FALSE	2	2	2	2	1	1	1	1	1	1	1	1	1	1	1	1	1	1	1	1	1	1	1	1	1	FALSE	FALSE	FALSE	FALSE	FALSE	FALSE	FALSE	FALSE	FALSE	FALSE	FALSE
233	Khirgis-Nur I-Altan-Teli	7.3	7.8		FALSE	FALSE	FALSE	FALSE	FALSE	FALSE	FALSE	FALSE	FALSE	FALSE	FALSE	FALSE	FALSE	FALSE	FALSE	FALSE	FALSE	FALSE	FALSE	FALSE	FALSE	FALSE	FALSE	FALSE	FALSE	FALSE	FALSE	FALSE	FALSE	FALSE	FALSE	FALSE	FALSE	1	1	1	1	1	1	FALSE	FALSE	FALSE	FALSE	FALSE	FALSE
234	Olkhon (Sarayskaya, hor. 3)	4.9	7.3		FALSE	FALSE	FALSE	FALSE	FALSE	FALSE	FALSE	FALSE	FALSE	2	2	2	2	1	1	1	1	1	1	1	1	1	1	1	1	1	1	1	1	1	1	1	1	1	FALSE	FALSE	FALSE	FALSE	FALSE	FALSE	FALSE	FALSE	FALSE	FALSE	FALSE
235	Dzhuanaryk	7.8	8.7		FALSE	FALSE	FALSE	FALSE	FALSE	FALSE	FALSE	FALSE	FALSE	FALSE	FALSE	FALSE	FALSE	FALSE	FALSE	FALSE	FALSE	FALSE	FALSE	FALSE	FALSE	FALSE	FALSE	FALSE	FALSE	FALSE	FALSE	FALSE	FALSE	FALSE	FALSE	FALSE	FALSE	FALSE	FALSE	FALSE	FALSE	FALSE	1	1	1	1	1	1	1
236	Bel'dersaj lower	7.8	8.7		FALSE	FALSE	FALSE	FALSE	FALSE	FALSE	FALSE	FALSE	FALSE	FALSE	FALSE	FALSE	FALSE	FALSE	FALSE	FALSE	FALSE	FALSE	FALSE	FALSE	FALSE	FALSE	FALSE	FALSE	FALSE	FALSE	FALSE	FALSE	FALSE	FALSE	FALSE	FALSE	FALSE	FALSE	FALSE	FALSE	FALSE	FALSE	1	1	1	1	1	1	1
237	Ortok	7.3	7.8		FALSE	FALSE	FALSE	FALSE	FALSE	FALSE	FALSE	FALSE	FALSE	FALSE	FALSE	FALSE	FALSE	FALSE	FALSE	FALSE	FALSE	FALSE	FALSE	FALSE	FALSE	FALSE	FALSE	FALSE	FALSE	FALSE	FALSE	FALSE	FALSE	FALSE	FALSE	FALSE	FALSE	1	1	1	1	1	1	FALSE	FALSE	FALSE	FALSE	FALSE	FALSE
238	Saty lower	7.8	8.7		FALSE	FALSE	FALSE	FALSE	FALSE	FALSE	FALSE	FALSE	FALSE	FALSE	FALSE	FALSE	FALSE	FALSE	FALSE	FALSE	FALSE	FALSE	FALSE	FALSE	FALSE	FALSE	FALSE	FALSE	FALSE	FALSE	FALSE	FALSE	FALSE	FALSE	FALSE	FALSE	FALSE	FALSE	FALSE	FALSE	FALSE	FALSE	1	1	1	1	1	1	1
239	Botamojnak	9.7	11.1		FALSE	FALSE	FALSE	FALSE	FALSE	FALSE	FALSE	FALSE	FALSE	FALSE	FALSE	FALSE	FALSE	FALSE	FALSE	FALSE	FALSE	FALSE	FALSE	FALSE	FALSE	FALSE	FALSE	FALSE	FALSE	FALSE	FALSE	FALSE	FALSE	FALSE	FALSE	FALSE	FALSE	FALSE	FALSE	FALSE	FALSE	FALSE	FALSE	FALSE	FALSE	FALSE	FALSE	FALSE	FALSE
240	Sor	7.3	7.8		FALSE	FALSE	FALSE	FALSE	FALSE	FALSE	FALSE	FALSE	FALSE	FALSE	FALSE	FALSE	FALSE	FALSE	FALSE	FALSE	FALSE	FALSE	FALSE	FALSE	FALSE	FALSE	FALSE	FALSE	FALSE	FALSE	FALSE	FALSE	FALSE	FALSE	FALSE	FALSE	FALSE	1	1	1	1	1	1	FALSE	FALSE	FALSE	FALSE	FALSE	FALSE
241	Karabastuz	4.9	7.3		FALSE	FALSE	FALSE	FALSE	FALSE	FALSE	FALSE	FALSE	FALSE	2	2	2	2	1	1	1	1	1	1	1	1	1	1	1	1	1	1	1	1	1	1	1	1	1	FALSE	FALSE	FALSE	FALSE	FALSE	FALSE	FALSE	FALSE	FALSE	FALSE	FALSE
242	Turme	9.7	11.1		FALSE	FALSE	FALSE	FALSE	FALSE	FALSE	FALSE	FALSE	FALSE	FALSE	FALSE	FALSE	FALSE	FALSE	FALSE	FALSE	FALSE	FALSE	FALSE	FALSE	FALSE	FALSE	FALSE	FALSE	FALSE	FALSE	FALSE	FALSE	FALSE	FALSE	FALSE	FALSE	FALSE	FALSE	FALSE	FALSE	FALSE	FALSE	FALSE	FALSE	FALSE	FALSE	FALSE	FALSE	FALSE
243	Pentalophos 1 (PNT)	9.7	11.1		FALSE	FALSE	FALSE	FALSE	FALSE	FALSE	FALSE	FALSE	FALSE	FALSE	FALSE	FALSE	FALSE	FALSE	FALSE	FALSE	FALSE	FALSE	FALSE	FALSE	FALSE	FALSE	FALSE	FALSE	FALSE	FALSE	FALSE	FALSE	FALSE	FALSE	FALSE	FALSE	FALSE	FALSE	FALSE	FALSE	FALSE	FALSE	FALSE	FALSE	FALSE	FALSE	FALSE	FALSE	FALSE
244	Nikiti 2 (NIK)	7.8	8.7		FALSE	FALSE	FALSE	FALSE	FALSE	FALSE	FALSE	FALSE	FALSE	FALSE	FALSE	FALSE	FALSE	FALSE	FALSE	FALSE	FALSE	FALSE	FALSE	FALSE	FALSE	FALSE	FALSE	FALSE	FALSE	FALSE	FALSE	FALSE	FALSE	FALSE	FALSE	FALSE	FALSE	FALSE	FALSE	FALSE	FALSE	FALSE	1	1	1	1	1	1	1
245	Vathylakkos 1 (VLO)	7.3	7.8		FALSE	FALSE	FALSE	FALSE	FALSE	FALSE	FALSE	FALSE	FALSE	FALSE	FALSE	FALSE	FALSE	FALSE	FALSE	FALSE	FALSE	FALSE	FALSE	FALSE	FALSE	FALSE	FALSE	FALSE	FALSE	FALSE	FALSE	FALSE	FALSE	FALSE	FALSE	FALSE	FALSE	1	1	1	1	1	1	FALSE	FALSE	FALSE	FALSE	FALSE	FALSE
246	Vathylakkos 2 (VTK)	7.3	7.8		FALSE	FALSE	FALSE	FALSE	FALSE	FALSE	FALSE	FALSE	FALSE	FALSE	FALSE	FALSE	FALSE	FALSE	FALSE	FALSE	FALSE	FALSE	FALSE	FALSE	FALSE	FALSE	FALSE	FALSE	FALSE	FALSE	FALSE	FALSE	FALSE	FALSE	FALSE	FALSE	FALSE	1	1	1	1	1	1	FALSE	FALSE	FALSE	FALSE	FALSE	FALSE
247	Vathylakkos 3 (VAT)	7.3	7.8		FALSE	FALSE	FALSE	FALSE	FALSE	FALSE	FALSE	FALSE	FALSE	FALSE	FALSE	FALSE	FALSE	FALSE	FALSE	FALSE	FALSE	FALSE	FALSE	FALSE	FALSE	FALSE	FALSE	FALSE	FALSE	FALSE	FALSE	FALSE	FALSE	FALSE	FALSE	FALSE	FALSE	1	1	1	1	1	1	FALSE	FALSE	FALSE	FALSE	FALSE	FALSE
248	Samos (A-1)	7.3	7.8		FALSE	FALSE	FALSE	FALSE	FALSE	FALSE	FALSE	FALSE	FALSE	FALSE	FALSE	FALSE	FALSE	FALSE	FALSE	FALSE	FALSE	FALSE	FALSE	FALSE	FALSE	FALSE	FALSE	FALSE	FALSE	FALSE	FALSE	FALSE	FALSE	FALSE	FALSE	FALSE	FALSE	1	1	1	1	1	1	FALSE	FALSE	FALSE	FALSE	FALSE	FALSE
249	Tanagra	7.8	8.7		FALSE	FALSE	FALSE	FALSE	FALSE	FALSE	FALSE	FALSE	FALSE	FALSE	FALSE	FALSE	FALSE	FALSE	FALSE	FALSE	FALSE	FALSE	FALSE	FALSE	FALSE	FALSE	FALSE	FALSE	FALSE	FALSE	FALSE	FALSE	FALSE	FALSE	FALSE	FALSE	FALSE	FALSE	FALSE	FALSE	FALSE	FALSE	1	1	1	1	1	1	1
250	Chalkoutsi	7.3	7.8		FALSE	FALSE	FALSE	FALSE	FALSE	FALSE	FALSE	FALSE	FALSE	FALSE	FALSE	FALSE	FALSE	FALSE	FALSE	FALSE	FALSE	FALSE	FALSE	FALSE	FALSE	FALSE	FALSE	FALSE	FALSE	FALSE	FALSE	FALSE	FALSE	FALSE	FALSE	FALSE	FALSE	1	1	1	1	1	1	FALSE	FALSE	FALSE	FALSE	FALSE	FALSE
251	Triada	7.8	8.7		FALSE	FALSE	FALSE	FALSE	FALSE	FALSE	FALSE	FALSE	FALSE	FALSE	FALSE	FALSE	FALSE	FALSE	FALSE	FALSE	FALSE	FALSE	FALSE	FALSE	FALSE	FALSE	FALSE	FALSE	FALSE	FALSE	FALSE	FALSE	FALSE	FALSE	FALSE	FALSE	FALSE	FALSE	FALSE	FALSE	FALSE	FALSE	1	1	1	1	1	1	1
252	Alifakas	7.3	7.8		FALSE	FALSE	FALSE	FALSE	FALSE	FALSE	FALSE	FALSE	FALSE	FALSE	FALSE	FALSE	FALSE	FALSE	FALSE	FALSE	FALSE	FALSE	FALSE	FALSE	FALSE	FALSE	FALSE	FALSE	FALSE	FALSE	FALSE	FALSE	FALSE	FALSE	FALSE	FALSE	FALSE	1	1	1	1	1	1	FALSE	FALSE	FALSE	FALSE	FALSE	FALSE
253	Achladi	7.3	7.8		FALSE	FALSE	FALSE	FALSE	FALSE	FALSE	FALSE	FALSE	FALSE	FALSE	FALSE	FALSE	FALSE	FALSE	FALSE	FALSE	FALSE	FALSE	FALSE	FALSE	FALSE	FALSE	FALSE	FALSE	FALSE	FALSE	FALSE	FALSE	FALSE	FALSE	FALSE	FALSE	FALSE	1	1	1	1	1	1	FALSE	FALSE	FALSE	FALSE	FALSE	FALSE
254	Rhodes	7.8	8.7		FALSE	FALSE	FALSE	FALSE	FALSE	FALSE	FALSE	FALSE	FALSE	FALSE	FALSE	FALSE	FALSE	FALSE	FALSE	FALSE	FALSE	FALSE	FALSE	FALSE	FALSE	FALSE	FALSE	FALSE	FALSE	FALSE	FALSE	FALSE	FALSE	FALSE	FALSE	FALSE	FALSE	FALSE	FALSE	FALSE	FALSE	FALSE	1	1	1	1	1	1	1
255	Servia	7.8	8.7		FALSE	FALSE	FALSE	FALSE	FALSE	FALSE	FALSE	FALSE	FALSE	FALSE	FALSE	FALSE	FALSE	FALSE	FALSE	FALSE	FALSE	FALSE	FALSE	FALSE	FALSE	FALSE	FALSE	FALSE	FALSE	FALSE	FALSE	FALSE	FALSE	FALSE	FALSE	FALSE	FALSE	FALSE	FALSE	FALSE	FALSE	FALSE	1	1	1	1	1	1	1
256	Ano Metochi	7.3	7.8		FALSE	FALSE	FALSE	FALSE	FALSE	FALSE	FALSE	FALSE	FALSE	FALSE	FALSE	FALSE	FALSE	FALSE	FALSE	FALSE	FALSE	FALSE	FALSE	FALSE	FALSE	FALSE	FALSE	FALSE	FALSE	FALSE	FALSE	FALSE	FALSE	FALSE	FALSE	FALSE	FALSE	1	1	1	1	1	1	FALSE	FALSE	FALSE	FALSE	FALSE	FALSE
257	Pikermi-MNHN (PIK)	7.3	7.8		FALSE	FALSE	FALSE	FALSE	FALSE	FALSE	FALSE	FALSE	FALSE	FALSE	FALSE	FALSE	FALSE	FALSE	FALSE	FALSE	FALSE	FALSE	FALSE	FALSE	FALSE	FALSE	FALSE	FALSE	FALSE	FALSE	FALSE	FALSE	FALSE	FALSE	FALSE	FALSE	FALSE	1	1	1	1	1	1	FALSE	FALSE	FALSE	FALSE	FALSE	FALSE
258	Chomateres	7.3	7.8		FALSE	FALSE	FALSE	FALSE	FALSE	FALSE	FALSE	FALSE	FALSE	FALSE	FALSE	FALSE	FALSE	FALSE	FALSE	FALSE	FALSE	FALSE	FALSE	FALSE	FALSE	FALSE	FALSE	FALSE	FALSE	FALSE	FALSE	FALSE	FALSE	FALSE	FALSE	FALSE	FALSE	1	1	1	1	1	1	FALSE	FALSE	FALSE	FALSE	FALSE	FALSE
259	Dytiko 1 (DTK)	4.9	7.3		FALSE	FALSE	FALSE	FALSE	FALSE	FALSE	FALSE	FALSE	FALSE	2	2	2	2	1	1	1	1	1	1	1	1	1	1	1	1	1	1	1	1	1	1	1	1	1	FALSE	FALSE	FALSE	FALSE	FALSE	FALSE	FALSE	FALSE	FALSE	FALSE	FALSE
260	Dytiko 2 (DIT)	4.9	7.3		FALSE	FALSE	FALSE	FALSE	FALSE	FALSE	FALSE	FALSE	FALSE	2	2	2	2	1	1	1	1	1	1	1	1	1	1	1	1	1	1	1	1	1	1	1	1	1	FALSE	FALSE	FALSE	FALSE	FALSE	FALSE	FALSE	FALSE	FALSE	FALSE	FALSE
261	Dytiko 3 (DKO)	4.9	7.3		FALSE	FALSE	FALSE	FALSE	FALSE	FALSE	FALSE	FALSE	FALSE	2	2	2	2	1	1	1	1	1	1	1	1	1	1	1	1	1	1	1	1	1	1	1	1	1	FALSE	FALSE	FALSE	FALSE	FALSE	FALSE	FALSE	FALSE	FALSE	FALSE	FALSE
262	Sinap 8B	9.7	11.1		FALSE	FALSE	FALSE	FALSE	FALSE	FALSE	FALSE	FALSE	FALSE	FALSE	FALSE	FALSE	FALSE	FALSE	FALSE	FALSE	FALSE	FALSE	FALSE	FALSE	FALSE	FALSE	FALSE	FALSE	FALSE	FALSE	FALSE	FALSE	FALSE	FALSE	FALSE	FALSE	FALSE	FALSE	FALSE	FALSE	FALSE	FALSE	FALSE	FALSE	FALSE	FALSE	FALSE	FALSE	FALSE
263	Lantian-jiulaopo-s3	7.3	7.8		FALSE	FALSE	FALSE	FALSE	FALSE	FALSE	FALSE	FALSE	FALSE	FALSE	FALSE	FALSE	FALSE	FALSE	FALSE	FALSE	FALSE	FALSE	FALSE	FALSE	FALSE	FALSE	FALSE	FALSE	FALSE	FALSE	FALSE	FALSE	FALSE	FALSE	FALSE	FALSE	FALSE	1	1	1	1	1	1	FALSE	FALSE	FALSE	FALSE	FALSE	FALSE
264	Lantian-Shuijiazui	9.7	11.1		FALSE	FALSE	FALSE	FALSE	FALSE	FALSE	FALSE	FALSE	FALSE	FALSE	FALSE	FALSE	FALSE	FALSE	FALSE	FALSE	FALSE	FALSE	FALSE	FALSE	FALSE	FALSE	FALSE	FALSE	FALSE	FALSE	FALSE	FALSE	FALSE	FALSE	FALSE	FALSE	FALSE	FALSE	FALSE	FALSE	FALSE	FALSE	FALSE	FALSE	FALSE	FALSE	FALSE	FALSE	FALSE
265	Lantian-koujiacun-damiaogou	7.3	7.8		FALSE	FALSE	FALSE	FALSE	FALSE	FALSE	FALSE	FALSE	FALSE	FALSE	FALSE	FALSE	FALSE	FALSE	FALSE	FALSE	FALSE	FALSE	FALSE	FALSE	FALSE	FALSE	FALSE	FALSE	FALSE	FALSE	FALSE	FALSE	FALSE	FALSE	FALSE	FALSE	FALSE	1	1	1	1	1	1	FALSE	FALSE	FALSE	FALSE	FALSE	FALSE
266	Lantian-majiahe-yuanjiagou	7.3	7.8		FALSE	FALSE	FALSE	FALSE	FALSE	FALSE	FALSE	FALSE	FALSE	FALSE	FALSE	FALSE	FALSE	FALSE	FALSE	FALSE	FALSE	FALSE	FALSE	FALSE	FALSE	FALSE	FALSE	FALSE	FALSE	FALSE	FALSE	FALSE	FALSE	FALSE	FALSE	FALSE	FALSE	1	1	1	1	1	1	FALSE	FALSE	FALSE	FALSE	FALSE	FALSE
267	Lantian-gongwangling-shuizigou	7.3	7.8		FALSE	FALSE	FALSE	FALSE	FALSE	FALSE	FALSE	FALSE	FALSE	FALSE	FALSE	FALSE	FALSE	FALSE	FALSE	FALSE	FALSE	FALSE	FALSE	FALSE	FALSE	FALSE	FALSE	FALSE	FALSE	FALSE	FALSE	FALSE	FALSE	FALSE	FALSE	FALSE	FALSE	1	1	1	1	1	1	FALSE	FALSE	FALSE	FALSE	FALSE	FALSE
268	Yushe-hounao	4.9	7.3		FALSE	FALSE	FALSE	FALSE	FALSE	FALSE	FALSE	FALSE	FALSE	2	2	2	2	1	1	1	1	1	1	1	1	1	1	1	1	1	1	1	1	1	1	1	1	1	FALSE	FALSE	FALSE	FALSE	FALSE	FALSE	FALSE	FALSE	FALSE	FALSE	FALSE
269	Lufeng-shihuiba	7.3	7.8		FALSE	FALSE	FALSE	FALSE	FALSE	FALSE	FALSE	FALSE	FALSE	FALSE	FALSE	FALSE	FALSE	FALSE	FALSE	FALSE	FALSE	FALSE	FALSE	FALSE	FALSE	FALSE	FALSE	FALSE	FALSE	FALSE	FALSE	FALSE	FALSE	FALSE	FALSE	FALSE	FALSE	1	1	1	1	1	1	FALSE	FALSE	FALSE	FALSE	FALSE	FALSE
270	Grakali	9.7	11.1		FALSE	FALSE	FALSE	FALSE	FALSE	FALSE	FALSE	FALSE	FALSE	FALSE	FALSE	FALSE	FALSE	FALSE	FALSE	FALSE	FALSE	FALSE	FALSE	FALSE	FALSE	FALSE	FALSE	FALSE	FALSE	FALSE	FALSE	FALSE	FALSE	FALSE	FALSE	FALSE	FALSE	FALSE	FALSE	FALSE	FALSE	FALSE	FALSE	FALSE	FALSE	FALSE	FALSE	FALSE	FALSE
271	Udabno II	8.7	9.7		FALSE	FALSE	FALSE	FALSE	FALSE	FALSE	FALSE	FALSE	FALSE	FALSE	FALSE	FALSE	FALSE	FALSE	FALSE	FALSE	FALSE	FALSE	FALSE	FALSE	FALSE	FALSE	FALSE	FALSE	FALSE	FALSE	FALSE	FALSE	FALSE	FALSE	FALSE	FALSE	FALSE	FALSE	FALSE	FALSE	FALSE	FALSE	FALSE	FALSE	FALSE	FALSE	FALSE	FALSE	FALSE
272	Eldari II & III	7.8	8.7		FALSE	FALSE	FALSE	FALSE	FALSE	FALSE	FALSE	FALSE	FALSE	FALSE	FALSE	FALSE	FALSE	FALSE	FALSE	FALSE	FALSE	FALSE	FALSE	FALSE	FALSE	FALSE	FALSE	FALSE	FALSE	FALSE	FALSE	FALSE	FALSE	FALSE	FALSE	FALSE	FALSE	FALSE	FALSE	FALSE	FALSE	FALSE	1	1	1	1	1	1	1
273	Natlismtsemeli I	9.7	11.1		FALSE	FALSE	FALSE	FALSE	FALSE	FALSE	FALSE	FALSE	FALSE	FALSE	FALSE	FALSE	FALSE	FALSE	FALSE	FALSE	FALSE	FALSE	FALSE	FALSE	FALSE	FALSE	FALSE	FALSE	FALSE	FALSE	FALSE	FALSE	FALSE	FALSE	FALSE	FALSE	FALSE	FALSE	FALSE	FALSE	FALSE	FALSE	FALSE	FALSE	FALSE	FALSE	FALSE	FALSE	FALSE
274	Buzhor 2	9.7	11.1		FALSE	FALSE	FALSE	FALSE	FALSE	FALSE	FALSE	FALSE	FALSE	FALSE	FALSE	FALSE	FALSE	FALSE	FALSE	FALSE	FALSE	FALSE	FALSE	FALSE	FALSE	FALSE	FALSE	FALSE	FALSE	FALSE	FALSE	FALSE	FALSE	FALSE	FALSE	FALSE	FALSE	FALSE	FALSE	FALSE	FALSE	FALSE	FALSE	FALSE	FALSE	FALSE	FALSE	FALSE	FALSE
275	Atavaska	9.7	11.1		FALSE	FALSE	FALSE	FALSE	FALSE	FALSE	FALSE	FALSE	FALSE	FALSE	FALSE	FALSE	FALSE	FALSE	FALSE	FALSE	FALSE	FALSE	FALSE	FALSE	FALSE	FALSE	FALSE	FALSE	FALSE	FALSE	FALSE	FALSE	FALSE	FALSE	FALSE	FALSE	FALSE	FALSE	FALSE	FALSE	FALSE	FALSE	FALSE	FALSE	FALSE	FALSE	FALSE	FALSE	FALSE
276	Poksheshty	8.7	9.7		FALSE	FALSE	FALSE	FALSE	FALSE	FALSE	FALSE	FALSE	FALSE	FALSE	FALSE	FALSE	FALSE	FALSE	FALSE	FALSE	FALSE	FALSE	FALSE	FALSE	FALSE	FALSE	FALSE	FALSE	FALSE	FALSE	FALSE	FALSE	FALSE	FALSE	FALSE	FALSE	FALSE	FALSE	FALSE	FALSE	FALSE	FALSE	FALSE	FALSE	FALSE	FALSE	FALSE	FALSE	FALSE
277	Fiume Santo	7.3	7.8		FALSE	FALSE	FALSE	FALSE	FALSE	FALSE	FALSE	FALSE	FALSE	FALSE	FALSE	FALSE	FALSE	FALSE	FALSE	FALSE	FALSE	FALSE	FALSE	FALSE	FALSE	FALSE	FALSE	FALSE	FALSE	FALSE	FALSE	FALSE	FALSE	FALSE	FALSE	FALSE	FALSE	1	1	1	1	1	1	FALSE	FALSE	FALSE	FALSE	FALSE	FALSE
278	Serrazzano	7.3	7.8		FALSE	FALSE	FALSE	FALSE	FALSE	FALSE	FALSE	FALSE	FALSE	FALSE	FALSE	FALSE	FALSE	FALSE	FALSE	FALSE	FALSE	FALSE	FALSE	FALSE	FALSE	FALSE	FALSE	FALSE	FALSE	FALSE	FALSE	FALSE	FALSE	FALSE	FALSE	FALSE	FALSE	1	1	1	1	1	1	FALSE	FALSE	FALSE	FALSE	FALSE	FALSE
279	Velona	4.9	7.3		FALSE	FALSE	FALSE	FALSE	FALSE	FALSE	FALSE	FALSE	FALSE	2	2	2	2	1	1	1	1	1	1	1	1	1	1	1	1	1	1	1	1	1	1	1	1	1	FALSE	FALSE	FALSE	FALSE	FALSE	FALSE	FALSE	FALSE	FALSE	FALSE	FALSE
280	Hostalets de Pierola Superior	9.7	11.1		FALSE	FALSE	FALSE	FALSE	FALSE	FALSE	FALSE	FALSE	FALSE	FALSE	FALSE	FALSE	FALSE	FALSE	FALSE	FALSE	FALSE	FALSE	FALSE	FALSE	FALSE	FALSE	FALSE	FALSE	FALSE	FALSE	FALSE	FALSE	FALSE	FALSE	FALSE	FALSE	FALSE	FALSE	FALSE	FALSE	FALSE	FALSE	FALSE	FALSE	FALSE	FALSE	FALSE	FALSE	FALSE
281	Crevillente 15	7.3	7.8		FALSE	FALSE	FALSE	FALSE	FALSE	FALSE	FALSE	FALSE	FALSE	FALSE	FALSE	FALSE	FALSE	FALSE	FALSE	FALSE	FALSE	FALSE	FALSE	FALSE	FALSE	FALSE	FALSE	FALSE	FALSE	FALSE	FALSE	FALSE	FALSE	FALSE	FALSE	FALSE	FALSE	1	1	1	1	1	1	FALSE	FALSE	FALSE	FALSE	FALSE	FALSE
282	Crevillente 16	7.3	7.8		FALSE	FALSE	FALSE	FALSE	FALSE	FALSE	FALSE	FALSE	FALSE	FALSE	FALSE	FALSE	FALSE	FALSE	FALSE	FALSE	FALSE	FALSE	FALSE	FALSE	FALSE	FALSE	FALSE	FALSE	FALSE	FALSE	FALSE	FALSE	FALSE	FALSE	FALSE	FALSE	FALSE	1	1	1	1	1	1	FALSE	FALSE	FALSE	FALSE	FALSE	FALSE
283	Chimishlija (Cimislia)	7.3	7.8		FALSE	FALSE	FALSE	FALSE	FALSE	FALSE	FALSE	FALSE	FALSE	FALSE	FALSE	FALSE	FALSE	FALSE	FALSE	FALSE	FALSE	FALSE	FALSE	FALSE	FALSE	FALSE	FALSE	FALSE	FALSE	FALSE	FALSE	FALSE	FALSE	FALSE	FALSE	FALSE	FALSE	1	1	1	1	1	1	FALSE	FALSE	FALSE	FALSE	FALSE	FALSE
284	Kujalnitskij liman	7.8	8.7		FALSE	FALSE	FALSE	FALSE	FALSE	FALSE	FALSE	FALSE	FALSE	FALSE	FALSE	FALSE	FALSE	FALSE	FALSE	FALSE	FALSE	FALSE	FALSE	FALSE	FALSE	FALSE	FALSE	FALSE	FALSE	FALSE	FALSE	FALSE	FALSE	FALSE	FALSE	FALSE	FALSE	FALSE	FALSE	FALSE	FALSE	FALSE	1	1	1	1	1	1	1
285	Pichugino	7.8	8.7		FALSE	FALSE	FALSE	FALSE	FALSE	FALSE	FALSE	FALSE	FALSE	FALSE	FALSE	FALSE	FALSE	FALSE	FALSE	FALSE	FALSE	FALSE	FALSE	FALSE	FALSE	FALSE	FALSE	FALSE	FALSE	FALSE	FALSE	FALSE	FALSE	FALSE	FALSE	FALSE	FALSE	FALSE	FALSE	FALSE	FALSE	FALSE	1	1	1	1	1	1	1
286	Tiraspol (Kolkotova Balka)	7.8	8.7		FALSE	FALSE	FALSE	FALSE	FALSE	FALSE	FALSE	FALSE	FALSE	FALSE	FALSE	FALSE	FALSE	FALSE	FALSE	FALSE	FALSE	FALSE	FALSE	FALSE	FALSE	FALSE	FALSE	FALSE	FALSE	FALSE	FALSE	FALSE	FALSE	FALSE	FALSE	FALSE	FALSE	FALSE	FALSE	FALSE	FALSE	FALSE	1	1	1	1	1	1	1
287	Odessa 2	4.9	7.3		FALSE	FALSE	FALSE	FALSE	FALSE	FALSE	FALSE	FALSE	FALSE	2	2	2	2	1	1	1	1	1	1	1	1	1	1	1	1	1	1	1	1	1	1	1	1	1	FALSE	FALSE	FALSE	FALSE	FALSE	FALSE	FALSE	FALSE	FALSE	FALSE	FALSE
288	Krivaja Balka	4.9	7.3		FALSE	FALSE	FALSE	FALSE	FALSE	FALSE	FALSE	FALSE	FALSE	2	2	2	2	1	1	1	1	1	1	1	1	1	1	1	1	1	1	1	1	1	1	1	1	1	FALSE	FALSE	FALSE	FALSE	FALSE	FALSE	FALSE	FALSE	FALSE	FALSE	FALSE
289	Zheltokamenka	9.7	11.1		FALSE	FALSE	FALSE	FALSE	FALSE	FALSE	FALSE	FALSE	FALSE	FALSE	FALSE	FALSE	FALSE	FALSE	FALSE	FALSE	FALSE	FALSE	FALSE	FALSE	FALSE	FALSE	FALSE	FALSE	FALSE	FALSE	FALSE	FALSE	FALSE	FALSE	FALSE	FALSE	FALSE	FALSE	FALSE	FALSE	FALSE	FALSE	FALSE	FALSE	FALSE	FALSE	FALSE	FALSE	FALSE
290	Inzersdorf	9.7	11.1		FALSE	FALSE	FALSE	FALSE	FALSE	FALSE	FALSE	FALSE	FALSE	FALSE	FALSE	FALSE	FALSE	FALSE	FALSE	FALSE	FALSE	FALSE	FALSE	FALSE	FALSE	FALSE	FALSE	FALSE	FALSE	FALSE	FALSE	FALSE	FALSE	FALSE	FALSE	FALSE	FALSE	FALSE	FALSE	FALSE	FALSE	FALSE	FALSE	FALSE	FALSE	FALSE	FALSE	FALSE	FALSE
291	Aljezar B	7.3	7.8		FALSE	FALSE	FALSE	FALSE	FALSE	FALSE	FALSE	FALSE	FALSE	FALSE	FALSE	FALSE	FALSE	FALSE	FALSE	FALSE	FALSE	FALSE	FALSE	FALSE	FALSE	FALSE	FALSE	FALSE	FALSE	FALSE	FALSE	FALSE	FALSE	FALSE	FALSE	FALSE	FALSE	1	1	1	1	1	1	FALSE	FALSE	FALSE	FALSE	FALSE	FALSE
292	Dinotheriensande	9.7	11.1		FALSE	FALSE	FALSE	FALSE	FALSE	FALSE	FALSE	FALSE	FALSE	FALSE	FALSE	FALSE	FALSE	FALSE	FALSE	FALSE	FALSE	FALSE	FALSE	FALSE	FALSE	FALSE	FALSE	FALSE	FALSE	FALSE	FALSE	FALSE	FALSE	FALSE	FALSE	FALSE	FALSE	FALSE	FALSE	FALSE	FALSE	FALSE	FALSE	FALSE	FALSE	FALSE	FALSE	FALSE	FALSE
293	Breitenfeld	9.7	11.1		FALSE	FALSE	FALSE	FALSE	FALSE	FALSE	FALSE	FALSE	FALSE	FALSE	FALSE	FALSE	FALSE	FALSE	FALSE	FALSE	FALSE	FALSE	FALSE	FALSE	FALSE	FALSE	FALSE	FALSE	FALSE	FALSE	FALSE	FALSE	FALSE	FALSE	FALSE	FALSE	FALSE	FALSE	FALSE	FALSE	FALSE	FALSE	FALSE	FALSE	FALSE	FALSE	FALSE	FALSE	FALSE
294	Bermersheim	9.7	11.1		FALSE	FALSE	FALSE	FALSE	FALSE	FALSE	FALSE	FALSE	FALSE	FALSE	FALSE	FALSE	FALSE	FALSE	FALSE	FALSE	FALSE	FALSE	FALSE	FALSE	FALSE	FALSE	FALSE	FALSE	FALSE	FALSE	FALSE	FALSE	FALSE	FALSE	FALSE	FALSE	FALSE	FALSE	FALSE	FALSE	FALSE	FALSE	FALSE	FALSE	FALSE	FALSE	FALSE	FALSE	FALSE
295	Laaerberg	9.7	11.1		FALSE	FALSE	FALSE	FALSE	FALSE	FALSE	FALSE	FALSE	FALSE	FALSE	FALSE	FALSE	FALSE	FALSE	FALSE	FALSE	FALSE	FALSE	FALSE	FALSE	FALSE	FALSE	FALSE	FALSE	FALSE	FALSE	FALSE	FALSE	FALSE	FALSE	FALSE	FALSE	FALSE	FALSE	FALSE	FALSE	FALSE	FALSE	FALSE	FALSE	FALSE	FALSE	FALSE	FALSE	FALSE
296	Nikolsburg	9.7	11.1		FALSE	FALSE	FALSE	FALSE	FALSE	FALSE	FALSE	FALSE	FALSE	FALSE	FALSE	FALSE	FALSE	FALSE	FALSE	FALSE	FALSE	FALSE	FALSE	FALSE	FALSE	FALSE	FALSE	FALSE	FALSE	FALSE	FALSE	FALSE	FALSE	FALSE	FALSE	FALSE	FALSE	FALSE	FALSE	FALSE	FALSE	FALSE	FALSE	FALSE	FALSE	FALSE	FALSE	FALSE	FALSE
297	Las Casiones	4.9	7.3		FALSE	FALSE	FALSE	FALSE	FALSE	FALSE	FALSE	FALSE	FALSE	2	2	2	2	1	1	1	1	1	1	1	1	1	1	1	1	1	1	1	1	1	1	1	1	1	FALSE	FALSE	FALSE	FALSE	FALSE	FALSE	FALSE	FALSE	FALSE	FALSE	FALSE
298	Arenas del Rey	4.9	7.3		FALSE	FALSE	FALSE	FALSE	FALSE	FALSE	FALSE	FALSE	FALSE	2	2	2	2	1	1	1	1	1	1	1	1	1	1	1	1	1	1	1	1	1	1	1	1	1	FALSE	FALSE	FALSE	FALSE	FALSE	FALSE	FALSE	FALSE	FALSE	FALSE	FALSE
299	Molina de Aragón	9.7	11.1		FALSE	FALSE	FALSE	FALSE	FALSE	FALSE	FALSE	FALSE	FALSE	FALSE	FALSE	FALSE	FALSE	FALSE	FALSE	FALSE	FALSE	FALSE	FALSE	FALSE	FALSE	FALSE	FALSE	FALSE	FALSE	FALSE	FALSE	FALSE	FALSE	FALSE	FALSE	FALSE	FALSE	FALSE	FALSE	FALSE	FALSE	FALSE	FALSE	FALSE	FALSE	FALSE	FALSE	FALSE	FALSE
300	Valdecebro 3	4.9	7.3		FALSE	FALSE	FALSE	FALSE	FALSE	FALSE	FALSE	FALSE	FALSE	2	2	2	2	1	1	1	1	1	1	1	1	1	1	1	1	1	1	1	1	1	1	1	1	1	FALSE	FALSE	FALSE	FALSE	FALSE	FALSE	FALSE	FALSE	FALSE	FALSE	FALSE
301	Cerro de la Garita	7.3	7.8		FALSE	FALSE	FALSE	FALSE	FALSE	FALSE	FALSE	FALSE	FALSE	FALSE	FALSE	FALSE	FALSE	FALSE	FALSE	FALSE	FALSE	FALSE	FALSE	FALSE	FALSE	FALSE	FALSE	FALSE	FALSE	FALSE	FALSE	FALSE	FALSE	FALSE	FALSE	FALSE	FALSE	1	1	1	1	1	1	FALSE	FALSE	FALSE	FALSE	FALSE	FALSE
302	Masada del Valle 2	7.3	7.8		FALSE	FALSE	FALSE	FALSE	FALSE	FALSE	FALSE	FALSE	FALSE	FALSE	FALSE	FALSE	FALSE	FALSE	FALSE	FALSE	FALSE	FALSE	FALSE	FALSE	FALSE	FALSE	FALSE	FALSE	FALSE	FALSE	FALSE	FALSE	FALSE	FALSE	FALSE	FALSE	FALSE	1	1	1	1	1	1	FALSE	FALSE	FALSE	FALSE	FALSE	FALSE
303	Croix-Rousse	8.7	9.7		FALSE	FALSE	FALSE	FALSE	FALSE	FALSE	FALSE	FALSE	FALSE	FALSE	FALSE	FALSE	FALSE	FALSE	FALSE	FALSE	FALSE	FALSE	FALSE	FALSE	FALSE	FALSE	FALSE	FALSE	FALSE	FALSE	FALSE	FALSE	FALSE	FALSE	FALSE	FALSE	FALSE	FALSE	FALSE	FALSE	FALSE	FALSE	FALSE	FALSE	FALSE	FALSE	FALSE	FALSE	FALSE
304	Masa del Barbo 2	8.7	9.7		FALSE	FALSE	FALSE	FALSE	FALSE	FALSE	FALSE	FALSE	FALSE	FALSE	FALSE	FALSE	FALSE	FALSE	FALSE	FALSE	FALSE	FALSE	FALSE	FALSE	FALSE	FALSE	FALSE	FALSE	FALSE	FALSE	FALSE	FALSE	FALSE	FALSE	FALSE	FALSE	FALSE	FALSE	FALSE	FALSE	FALSE	FALSE	FALSE	FALSE	FALSE	FALSE	FALSE	FALSE	FALSE
305	Orignac	8.7	9.7		FALSE	FALSE	FALSE	FALSE	FALSE	FALSE	FALSE	FALSE	FALSE	FALSE	FALSE	FALSE	FALSE	FALSE	FALSE	FALSE	FALSE	FALSE	FALSE	FALSE	FALSE	FALSE	FALSE	FALSE	FALSE	FALSE	FALSE	FALSE	FALSE	FALSE	FALSE	FALSE	FALSE	FALSE	FALSE	FALSE	FALSE	FALSE	FALSE	FALSE	FALSE	FALSE	FALSE	FALSE	FALSE
306	Das	9.7	11.1		FALSE	FALSE	FALSE	FALSE	FALSE	FALSE	FALSE	FALSE	FALSE	FALSE	FALSE	FALSE	FALSE	FALSE	FALSE	FALSE	FALSE	FALSE	FALSE	FALSE	FALSE	FALSE	FALSE	FALSE	FALSE	FALSE	FALSE	FALSE	FALSE	FALSE	FALSE	FALSE	FALSE	FALSE	FALSE	FALSE	FALSE	FALSE	FALSE	FALSE	FALSE	FALSE	FALSE	FALSE	FALSE
307	Estevar	9.7	11.1		FALSE	FALSE	FALSE	FALSE	FALSE	FALSE	FALSE	FALSE	FALSE	FALSE	FALSE	FALSE	FALSE	FALSE	FALSE	FALSE	FALSE	FALSE	FALSE	FALSE	FALSE	FALSE	FALSE	FALSE	FALSE	FALSE	FALSE	FALSE	FALSE	FALSE	FALSE	FALSE	FALSE	FALSE	FALSE	FALSE	FALSE	FALSE	FALSE	FALSE	FALSE	FALSE	FALSE	FALSE	FALSE
308	Hinterauerbach	9.7	11.1		FALSE	FALSE	FALSE	FALSE	FALSE	FALSE	FALSE	FALSE	FALSE	FALSE	FALSE	FALSE	FALSE	FALSE	FALSE	FALSE	FALSE	FALSE	FALSE	FALSE	FALSE	FALSE	FALSE	FALSE	FALSE	FALSE	FALSE	FALSE	FALSE	FALSE	FALSE	FALSE	FALSE	FALSE	FALSE	FALSE	FALSE	FALSE	FALSE	FALSE	FALSE	FALSE	FALSE	FALSE	FALSE
309	Peralejos D	7.8	8.7		FALSE	FALSE	FALSE	FALSE	FALSE	FALSE	FALSE	FALSE	FALSE	FALSE	FALSE	FALSE	FALSE	FALSE	FALSE	FALSE	FALSE	FALSE	FALSE	FALSE	FALSE	FALSE	FALSE	FALSE	FALSE	FALSE	FALSE	FALSE	FALSE	FALSE	FALSE	FALSE	FALSE	FALSE	FALSE	FALSE	FALSE	FALSE	1	1	1	1	1	1	1
310	Sinap 118	4.9	7.3		FALSE	FALSE	FALSE	FALSE	FALSE	FALSE	FALSE	FALSE	FALSE	2	2	2	2	1	1	1	1	1	1	1	1	1	1	1	1	1	1	1	1	1	1	1	1	1	FALSE	FALSE	FALSE	FALSE	FALSE	FALSE	FALSE	FALSE	FALSE	FALSE	FALSE
311	Esvres - Upper Faluns	9.7	11.1		FALSE	FALSE	FALSE	FALSE	FALSE	FALSE	FALSE	FALSE	FALSE	FALSE	FALSE	FALSE	FALSE	FALSE	FALSE	FALSE	FALSE	FALSE	FALSE	FALSE	FALSE	FALSE	FALSE	FALSE	FALSE	FALSE	FALSE	FALSE	FALSE	FALSE	FALSE	FALSE	FALSE	FALSE	FALSE	FALSE	FALSE	FALSE	FALSE	FALSE	FALSE	FALSE	FALSE	FALSE	FALSE
312	Masa del Barbo 2B	8.7	9.7		FALSE	FALSE	FALSE	FALSE	FALSE	FALSE	FALSE	FALSE	FALSE	FALSE	FALSE	FALSE	FALSE	FALSE	FALSE	FALSE	FALSE	FALSE	FALSE	FALSE	FALSE	FALSE	FALSE	FALSE	FALSE	FALSE	FALSE	FALSE	FALSE	FALSE	FALSE	FALSE	FALSE	FALSE	FALSE	FALSE	FALSE	FALSE	FALSE	FALSE	FALSE	FALSE	FALSE	FALSE	FALSE
313	Jebel Dhannah	4.9	7.3		FALSE	FALSE	FALSE	FALSE	FALSE	FALSE	FALSE	FALSE	FALSE	2	2	2	2	1	1	1	1	1	1	1	1	1	1	1	1	1	1	1	1	1	1	1	1	1	FALSE	FALSE	FALSE	FALSE	FALSE	FALSE	FALSE	FALSE	FALSE	FALSE	FALSE
314	Can Trullàs	8.7	9.7		FALSE	FALSE	FALSE	FALSE	FALSE	FALSE	FALSE	FALSE	FALSE	FALSE	FALSE	FALSE	FALSE	FALSE	FALSE	FALSE	FALSE	FALSE	FALSE	FALSE	FALSE	FALSE	FALSE	FALSE	FALSE	FALSE	FALSE	FALSE	FALSE	FALSE	FALSE	FALSE	FALSE	FALSE	FALSE	FALSE	FALSE	FALSE	FALSE	FALSE	FALSE	FALSE	FALSE	FALSE	FALSE
315	Achldorf	9.7	11.1		FALSE	FALSE	FALSE	FALSE	FALSE	FALSE	FALSE	FALSE	FALSE	FALSE	FALSE	FALSE	FALSE	FALSE	FALSE	FALSE	FALSE	FALSE	FALSE	FALSE	FALSE	FALSE	FALSE	FALSE	FALSE	FALSE	FALSE	FALSE	FALSE	FALSE	FALSE	FALSE	FALSE	FALSE	FALSE	FALSE	FALSE	FALSE	FALSE	FALSE	FALSE	FALSE	FALSE	FALSE	FALSE
316	Bonnefont	9.7	11.1		FALSE	FALSE	FALSE	FALSE	FALSE	FALSE	FALSE	FALSE	FALSE	FALSE	FALSE	FALSE	FALSE	FALSE	FALSE	FALSE	FALSE	FALSE	FALSE	FALSE	FALSE	FALSE	FALSE	FALSE	FALSE	FALSE	FALSE	FALSE	FALSE	FALSE	FALSE	FALSE	FALSE	FALSE	FALSE	FALSE	FALSE	FALSE	FALSE	FALSE	FALSE	FALSE	FALSE	FALSE	FALSE
317	Trie-sur-Baïse	9.7	11.1		FALSE	FALSE	FALSE	FALSE	FALSE	FALSE	FALSE	FALSE	FALSE	FALSE	FALSE	FALSE	FALSE	FALSE	FALSE	FALSE	FALSE	FALSE	FALSE	FALSE	FALSE	FALSE	FALSE	FALSE	FALSE	FALSE	FALSE	FALSE	FALSE	FALSE	FALSE	FALSE	FALSE	FALSE	FALSE	FALSE	FALSE	FALSE	FALSE	FALSE	FALSE	FALSE	FALSE	FALSE	FALSE
318	Nakali	9.7	11.1		FALSE	FALSE	FALSE	FALSE	FALSE	FALSE	FALSE	FALSE	FALSE	FALSE	FALSE	FALSE	FALSE	FALSE	FALSE	FALSE	FALSE	FALSE	FALSE	FALSE	FALSE	FALSE	FALSE	FALSE	FALSE	FALSE	FALSE	FALSE	FALSE	FALSE	FALSE	FALSE	FALSE	FALSE	FALSE	FALSE	FALSE	FALSE	FALSE	FALSE	FALSE	FALSE	FALSE	FALSE	FALSE
319	Builstyn Khudag	8.7	9.7		FALSE	FALSE	FALSE	FALSE	FALSE	FALSE	FALSE	FALSE	FALSE	FALSE	FALSE	FALSE	FALSE	FALSE	FALSE	FALSE	FALSE	FALSE	FALSE	FALSE	FALSE	FALSE	FALSE	FALSE	FALSE	FALSE	FALSE	FALSE	FALSE	FALSE	FALSE	FALSE	FALSE	FALSE	FALSE	FALSE	FALSE	FALSE	FALSE	FALSE	FALSE	FALSE	FALSE	FALSE	FALSE
320	Valdecebro 5	7.3	7.8		FALSE	FALSE	FALSE	FALSE	FALSE	FALSE	FALSE	FALSE	FALSE	FALSE	FALSE	FALSE	FALSE	FALSE	FALSE	FALSE	FALSE	FALSE	FALSE	FALSE	FALSE	FALSE	FALSE	FALSE	FALSE	FALSE	FALSE	FALSE	FALSE	FALSE	FALSE	FALSE	FALSE	1	1	1	1	1	1	FALSE	FALSE	FALSE	FALSE	FALSE	FALSE
321	Aveiras de Baixo	9.7	11.1		FALSE	FALSE	FALSE	FALSE	FALSE	FALSE	FALSE	FALSE	FALSE	FALSE	FALSE	FALSE	FALSE	FALSE	FALSE	FALSE	FALSE	FALSE	FALSE	FALSE	FALSE	FALSE	FALSE	FALSE	FALSE	FALSE	FALSE	FALSE	FALSE	FALSE	FALSE	FALSE	FALSE	FALSE	FALSE	FALSE	FALSE	FALSE	FALSE	FALSE	FALSE	FALSE	FALSE	FALSE	FALSE
322	Azambujeira inf.	9.7	11.1		FALSE	FALSE	FALSE	FALSE	FALSE	FALSE	FALSE	FALSE	FALSE	FALSE	FALSE	FALSE	FALSE	FALSE	FALSE	FALSE	FALSE	FALSE	FALSE	FALSE	FALSE	FALSE	FALSE	FALSE	FALSE	FALSE	FALSE	FALSE	FALSE	FALSE	FALSE	FALSE	FALSE	FALSE	FALSE	FALSE	FALSE	FALSE	FALSE	FALSE	FALSE	FALSE	FALSE	FALSE	FALSE
323	Hadjidimovo-1	7.3	7.8		FALSE	FALSE	FALSE	FALSE	FALSE	FALSE	FALSE	FALSE	FALSE	FALSE	FALSE	FALSE	FALSE	FALSE	FALSE	FALSE	FALSE	FALSE	FALSE	FALSE	FALSE	FALSE	FALSE	FALSE	FALSE	FALSE	FALSE	FALSE	FALSE	FALSE	FALSE	FALSE	FALSE	1	1	1	1	1	1	FALSE	FALSE	FALSE	FALSE	FALSE	FALSE
324	Gargano	4.9	7.3		FALSE	FALSE	FALSE	FALSE	FALSE	FALSE	FALSE	FALSE	FALSE	2	2	2	2	1	1	1	1	1	1	1	1	1	1	1	1	1	1	1	1	1	1	1	1	1	FALSE	FALSE	FALSE	FALSE	FALSE	FALSE	FALSE	FALSE	FALSE	FALSE	FALSE
325	Akgedik-Bayir	7.3	7.8		FALSE	FALSE	FALSE	FALSE	FALSE	FALSE	FALSE	FALSE	FALSE	FALSE	FALSE	FALSE	FALSE	FALSE	FALSE	FALSE	FALSE	FALSE	FALSE	FALSE	FALSE	FALSE	FALSE	FALSE	FALSE	FALSE	FALSE	FALSE	FALSE	FALSE	FALSE	FALSE	FALSE	1	1	1	1	1	1	FALSE	FALSE	FALSE	FALSE	FALSE	FALSE
326	Silata	4.9	7.3		FALSE	FALSE	FALSE	FALSE	FALSE	FALSE	FALSE	FALSE	FALSE	2	2	2	2	1	1	1	1	1	1	1	1	1	1	1	1	1	1	1	1	1	1	1	1	1	FALSE	FALSE	FALSE	FALSE	FALSE	FALSE	FALSE	FALSE	FALSE	FALSE	FALSE
327	Gusinyy perelyot	7.3	7.8		FALSE	FALSE	FALSE	FALSE	FALSE	FALSE	FALSE	FALSE	FALSE	FALSE	FALSE	FALSE	FALSE	FALSE	FALSE	FALSE	FALSE	FALSE	FALSE	FALSE	FALSE	FALSE	FALSE	FALSE	FALSE	FALSE	FALSE	FALSE	FALSE	FALSE	FALSE	FALSE	FALSE	1	1	1	1	1	1	FALSE	FALSE	FALSE	FALSE	FALSE	FALSE
328	Masia de la Roma 2	9.7	11.1		FALSE	FALSE	FALSE	FALSE	FALSE	FALSE	FALSE	FALSE	FALSE	FALSE	FALSE	FALSE	FALSE	FALSE	FALSE	FALSE	FALSE	FALSE	FALSE	FALSE	FALSE	FALSE	FALSE	FALSE	FALSE	FALSE	FALSE	FALSE	FALSE	FALSE	FALSE	FALSE	FALSE	FALSE	FALSE	FALSE	FALSE	FALSE	FALSE	FALSE	FALSE	FALSE	FALSE	FALSE	FALSE
329	Concud Barranco	7.3	7.8		FALSE	FALSE	FALSE	FALSE	FALSE	FALSE	FALSE	FALSE	FALSE	FALSE	FALSE	FALSE	FALSE	FALSE	FALSE	FALSE	FALSE	FALSE	FALSE	FALSE	FALSE	FALSE	FALSE	FALSE	FALSE	FALSE	FALSE	FALSE	FALSE	FALSE	FALSE	FALSE	FALSE	1	1	1	1	1	1	FALSE	FALSE	FALSE	FALSE	FALSE	FALSE
330	Kalimanci 1	7.8	8.7		FALSE	FALSE	FALSE	FALSE	FALSE	FALSE	FALSE	FALSE	FALSE	FALSE	FALSE	FALSE	FALSE	FALSE	FALSE	FALSE	FALSE	FALSE	FALSE	FALSE	FALSE	FALSE	FALSE	FALSE	FALSE	FALSE	FALSE	FALSE	FALSE	FALSE	FALSE	FALSE	FALSE	FALSE	FALSE	FALSE	FALSE	FALSE	1	1	1	1	1	1	1
331	Kalimanci 3	7.3	7.8		FALSE	FALSE	FALSE	FALSE	FALSE	FALSE	FALSE	FALSE	FALSE	FALSE	FALSE	FALSE	FALSE	FALSE	FALSE	FALSE	FALSE	FALSE	FALSE	FALSE	FALSE	FALSE	FALSE	FALSE	FALSE	FALSE	FALSE	FALSE	FALSE	FALSE	FALSE	FALSE	FALSE	1	1	1	1	1	1	FALSE	FALSE	FALSE	FALSE	FALSE	FALSE
332	Kalimanci 4	7.3	7.8		FALSE	FALSE	FALSE	FALSE	FALSE	FALSE	FALSE	FALSE	FALSE	FALSE	FALSE	FALSE	FALSE	FALSE	FALSE	FALSE	FALSE	FALSE	FALSE	FALSE	FALSE	FALSE	FALSE	FALSE	FALSE	FALSE	FALSE	FALSE	FALSE	FALSE	FALSE	FALSE	FALSE	1	1	1	1	1	1	FALSE	FALSE	FALSE	FALSE	FALSE	FALSE
333	Kromidovo 1	4.9	7.3		FALSE	FALSE	FALSE	FALSE	FALSE	FALSE	FALSE	FALSE	FALSE	2	2	2	2	1	1	1	1	1	1	1	1	1	1	1	1	1	1	1	1	1	1	1	1	1	FALSE	FALSE	FALSE	FALSE	FALSE	FALSE	FALSE	FALSE	FALSE	FALSE	FALSE
334	Hamra	4.9	7.3		FALSE	FALSE	FALSE	FALSE	FALSE	FALSE	FALSE	FALSE	FALSE	2	2	2	2	1	1	1	1	1	1	1	1	1	1	1	1	1	1	1	1	1	1	1	1	1	FALSE	FALSE	FALSE	FALSE	FALSE	FALSE	FALSE	FALSE	FALSE	FALSE	FALSE
335	Jebel Barakah	4.9	7.3		FALSE	FALSE	FALSE	FALSE	FALSE	FALSE	FALSE	FALSE	FALSE	2	2	2	2	1	1	1	1	1	1	1	1	1	1	1	1	1	1	1	1	1	1	1	1	1	FALSE	FALSE	FALSE	FALSE	FALSE	FALSE	FALSE	FALSE	FALSE	FALSE	FALSE
336	Shuwaihat	4.9	7.3		FALSE	FALSE	FALSE	FALSE	FALSE	FALSE	FALSE	FALSE	FALSE	2	2	2	2	1	1	1	1	1	1	1	1	1	1	1	1	1	1	1	1	1	1	1	1	1	FALSE	FALSE	FALSE	FALSE	FALSE	FALSE	FALSE	FALSE	FALSE	FALSE	FALSE
337	Thumayriya	4.9	7.3		FALSE	FALSE	FALSE	FALSE	FALSE	FALSE	FALSE	FALSE	FALSE	2	2	2	2	1	1	1	1	1	1	1	1	1	1	1	1	1	1	1	1	1	1	1	1	1	FALSE	FALSE	FALSE	FALSE	FALSE	FALSE	FALSE	FALSE	FALSE	FALSE	FALSE
338	Kihal	4.9	7.3		FALSE	FALSE	FALSE	FALSE	FALSE	FALSE	FALSE	FALSE	FALSE	2	2	2	2	1	1	1	1	1	1	1	1	1	1	1	1	1	1	1	1	1	1	1	1	1	FALSE	FALSE	FALSE	FALSE	FALSE	FALSE	FALSE	FALSE	FALSE	FALSE	FALSE
339	Lantian-6	7.3	7.8		FALSE	FALSE	FALSE	FALSE	FALSE	FALSE	FALSE	FALSE	FALSE	FALSE	FALSE	FALSE	FALSE	FALSE	FALSE	FALSE	FALSE	FALSE	FALSE	FALSE	FALSE	FALSE	FALSE	FALSE	FALSE	FALSE	FALSE	FALSE	FALSE	FALSE	FALSE	FALSE	FALSE	1	1	1	1	1	1	FALSE	FALSE	FALSE	FALSE	FALSE	FALSE
340	Prottes	8.7	9.7		FALSE	FALSE	FALSE	FALSE	FALSE	FALSE	FALSE	FALSE	FALSE	FALSE	FALSE	FALSE	FALSE	FALSE	FALSE	FALSE	FALSE	FALSE	FALSE	FALSE	FALSE	FALSE	FALSE	FALSE	FALSE	FALSE	FALSE	FALSE	FALSE	FALSE	FALSE	FALSE	FALSE	FALSE	FALSE	FALSE	FALSE	FALSE	FALSE	FALSE	FALSE	FALSE	FALSE	FALSE	FALSE
341	Edeleny	9.7	11.1		FALSE	FALSE	FALSE	FALSE	FALSE	FALSE	FALSE	FALSE	FALSE	FALSE	FALSE	FALSE	FALSE	FALSE	FALSE	FALSE	FALSE	FALSE	FALSE	FALSE	FALSE	FALSE	FALSE	FALSE	FALSE	FALSE	FALSE	FALSE	FALSE	FALSE	FALSE	FALSE	FALSE	FALSE	FALSE	FALSE	FALSE	FALSE	FALSE	FALSE	FALSE	FALSE	FALSE	FALSE	FALSE
342	Schwechat	8.7	9.7		FALSE	FALSE	FALSE	FALSE	FALSE	FALSE	FALSE	FALSE	FALSE	FALSE	FALSE	FALSE	FALSE	FALSE	FALSE	FALSE	FALSE	FALSE	FALSE	FALSE	FALSE	FALSE	FALSE	FALSE	FALSE	FALSE	FALSE	FALSE	FALSE	FALSE	FALSE	FALSE	FALSE	FALSE	FALSE	FALSE	FALSE	FALSE	FALSE	FALSE	FALSE	FALSE	FALSE	FALSE	FALSE
343	Chiang Muan	9.7	11.1		FALSE	FALSE	FALSE	FALSE	FALSE	FALSE	FALSE	FALSE	FALSE	FALSE	FALSE	FALSE	FALSE	FALSE	FALSE	FALSE	FALSE	FALSE	FALSE	FALSE	FALSE	FALSE	FALSE	FALSE	FALSE	FALSE	FALSE	FALSE	FALSE	FALSE	FALSE	FALSE	FALSE	FALSE	FALSE	FALSE	FALSE	FALSE	FALSE	FALSE	FALSE	FALSE	FALSE	FALSE	FALSE
344	Tha Chang 2	8.7	9.7		FALSE	FALSE	FALSE	FALSE	FALSE	FALSE	FALSE	FALSE	FALSE	FALSE	FALSE	FALSE	FALSE	FALSE	FALSE	FALSE	FALSE	FALSE	FALSE	FALSE	FALSE	FALSE	FALSE	FALSE	FALSE	FALSE	FALSE	FALSE	FALSE	FALSE	FALSE	FALSE	FALSE	FALSE	FALSE	FALSE	FALSE	FALSE	FALSE	FALSE	FALSE	FALSE	FALSE	FALSE	FALSE
345	Sop Mae Tham	9.7	11.1		FALSE	FALSE	FALSE	FALSE	FALSE	FALSE	FALSE	FALSE	FALSE	FALSE	FALSE	FALSE	FALSE	FALSE	FALSE	FALSE	FALSE	FALSE	FALSE	FALSE	FALSE	FALSE	FALSE	FALSE	FALSE	FALSE	FALSE	FALSE	FALSE	FALSE	FALSE	FALSE	FALSE	FALSE	FALSE	FALSE	FALSE	FALSE	FALSE	FALSE	FALSE	FALSE	FALSE	FALSE	FALSE
346	Lothagam 1	7.3	7.8		FALSE	FALSE	FALSE	FALSE	FALSE	FALSE	FALSE	FALSE	FALSE	FALSE	FALSE	FALSE	FALSE	FALSE	FALSE	FALSE	FALSE	FALSE	FALSE	FALSE	FALSE	FALSE	FALSE	FALSE	FALSE	FALSE	FALSE	FALSE	FALSE	FALSE	FALSE	FALSE	FALSE	1	1	1	1	1	1	FALSE	FALSE	FALSE	FALSE	FALSE	FALSE
347	Lothagam 2	4.9	7.3		FALSE	FALSE	FALSE	FALSE	FALSE	FALSE	FALSE	FALSE	FALSE	2	2	2	2	1	1	1	1	1	1	1	1	1	1	1	1	1	1	1	1	1	1	1	1	1	FALSE	FALSE	FALSE	FALSE	FALSE	FALSE	FALSE	FALSE	FALSE	FALSE	FALSE
348	Samburu Hills 2	8.7	9.7		FALSE	FALSE	FALSE	FALSE	FALSE	FALSE	FALSE	FALSE	FALSE	FALSE	FALSE	FALSE	FALSE	FALSE	FALSE	FALSE	FALSE	FALSE	FALSE	FALSE	FALSE	FALSE	FALSE	FALSE	FALSE	FALSE	FALSE	FALSE	FALSE	FALSE	FALSE	FALSE	FALSE	FALSE	FALSE	FALSE	FALSE	FALSE	FALSE	FALSE	FALSE	FALSE	FALSE	FALSE	FALSE
349	Manonga 1	4.9	7.3		FALSE	FALSE	FALSE	FALSE	FALSE	FALSE	FALSE	FALSE	FALSE	2	2	2	2	1	1	1	1	1	1	1	1	1	1	1	1	1	1	1	1	1	1	1	1	1	FALSE	FALSE	FALSE	FALSE	FALSE	FALSE	FALSE	FALSE	FALSE	FALSE	FALSE
350	Albertine 1	4.9	7.3		FALSE	FALSE	FALSE	FALSE	FALSE	FALSE	FALSE	FALSE	FALSE	2	2	2	2	1	1	1	1	1	1	1	1	1	1	1	1	1	1	1	1	1	1	1	1	1	FALSE	FALSE	FALSE	FALSE	FALSE	FALSE	FALSE	FALSE	FALSE	FALSE	FALSE
351	Albertine 6	8.7	9.7		FALSE	FALSE	FALSE	FALSE	FALSE	FALSE	FALSE	FALSE	FALSE	FALSE	FALSE	FALSE	FALSE	FALSE	FALSE	FALSE	FALSE	FALSE	FALSE	FALSE	FALSE	FALSE	FALSE	FALSE	FALSE	FALSE	FALSE	FALSE	FALSE	FALSE	FALSE	FALSE	FALSE	FALSE	FALSE	FALSE	FALSE	FALSE	FALSE	FALSE	FALSE	FALSE	FALSE	FALSE	FALSE
352	Albertine 7	4.9	7.3		FALSE	FALSE	FALSE	FALSE	FALSE	FALSE	FALSE	FALSE	FALSE	2	2	2	2	1	1	1	1	1	1	1	1	1	1	1	1	1	1	1	1	1	1	1	1	1	FALSE	FALSE	FALSE	FALSE	FALSE	FALSE	FALSE	FALSE	FALSE	FALSE	FALSE
353	Albertine 11	4.9	7.3		FALSE	FALSE	FALSE	FALSE	FALSE	FALSE	FALSE	FALSE	FALSE	2	2	2	2	1	1	1	1	1	1	1	1	1	1	1	1	1	1	1	1	1	1	1	1	1	FALSE	FALSE	FALSE	FALSE	FALSE	FALSE	FALSE	FALSE	FALSE	FALSE	FALSE
354	Albertine 14	4.9	7.3		FALSE	FALSE	FALSE	FALSE	FALSE	FALSE	FALSE	FALSE	FALSE	2	2	2	2	1	1	1	1	1	1	1	1	1	1	1	1	1	1	1	1	1	1	1	1	1	FALSE	FALSE	FALSE	FALSE	FALSE	FALSE	FALSE	FALSE	FALSE	FALSE	FALSE
355	Awash 1	9.7	11.1		FALSE	FALSE	FALSE	FALSE	FALSE	FALSE	FALSE	FALSE	FALSE	FALSE	FALSE	FALSE	FALSE	FALSE	FALSE	FALSE	FALSE	FALSE	FALSE	FALSE	FALSE	FALSE	FALSE	FALSE	FALSE	FALSE	FALSE	FALSE	FALSE	FALSE	FALSE	FALSE	FALSE	FALSE	FALSE	FALSE	FALSE	FALSE	FALSE	FALSE	FALSE	FALSE	FALSE	FALSE	FALSE
356	Ngorora	9.7	11.1		FALSE	FALSE	FALSE	FALSE	FALSE	FALSE	FALSE	FALSE	FALSE	FALSE	FALSE	FALSE	FALSE	FALSE	FALSE	FALSE	FALSE	FALSE	FALSE	FALSE	FALSE	FALSE	FALSE	FALSE	FALSE	FALSE	FALSE	FALSE	FALSE	FALSE	FALSE	FALSE	FALSE	FALSE	FALSE	FALSE	FALSE	FALSE	FALSE	FALSE	FALSE	FALSE	FALSE	FALSE	FALSE
357	Mpesida	4.9	7.3		FALSE	FALSE	FALSE	FALSE	FALSE	FALSE	FALSE	FALSE	FALSE	2	2	2	2	1	1	1	1	1	1	1	1	1	1	1	1	1	1	1	1	1	1	1	1	1	FALSE	FALSE	FALSE	FALSE	FALSE	FALSE	FALSE	FALSE	FALSE	FALSE	FALSE
358	Kefraya	7.3	7.8		FALSE	FALSE	FALSE	FALSE	FALSE	FALSE	FALSE	FALSE	FALSE	FALSE	FALSE	FALSE	FALSE	FALSE	FALSE	FALSE	FALSE	FALSE	FALSE	FALSE	FALSE	FALSE	FALSE	FALSE	FALSE	FALSE	FALSE	FALSE	FALSE	FALSE	FALSE	FALSE	FALSE	1	1	1	1	1	1	FALSE	FALSE	FALSE	FALSE	FALSE	FALSE
359	Akin	9.7	11.1		FALSE	FALSE	FALSE	FALSE	FALSE	FALSE	FALSE	FALSE	FALSE	FALSE	FALSE	FALSE	FALSE	FALSE	FALSE	FALSE	FALSE	FALSE	FALSE	FALSE	FALSE	FALSE	FALSE	FALSE	FALSE	FALSE	FALSE	FALSE	FALSE	FALSE	FALSE	FALSE	FALSE	FALSE	FALSE	FALSE	FALSE	FALSE	FALSE	FALSE	FALSE	FALSE	FALSE	FALSE	FALSE
360	Selcik	8.7	9.7		FALSE	FALSE	FALSE	FALSE	FALSE	FALSE	FALSE	FALSE	FALSE	FALSE	FALSE	FALSE	FALSE	FALSE	FALSE	FALSE	FALSE	FALSE	FALSE	FALSE	FALSE	FALSE	FALSE	FALSE	FALSE	FALSE	FALSE	FALSE	FALSE	FALSE	FALSE	FALSE	FALSE	FALSE	FALSE	FALSE	FALSE	FALSE	FALSE	FALSE	FALSE	FALSE	FALSE	FALSE	FALSE
361	Garkin	7.8	8.7		FALSE	FALSE	FALSE	FALSE	FALSE	FALSE	FALSE	FALSE	FALSE	FALSE	FALSE	FALSE	FALSE	FALSE	FALSE	FALSE	FALSE	FALSE	FALSE	FALSE	FALSE	FALSE	FALSE	FALSE	FALSE	FALSE	FALSE	FALSE	FALSE	FALSE	FALSE	FALSE	FALSE	FALSE	FALSE	FALSE	FALSE	FALSE	1	1	1	1	1	1	1
362	Sandikli Kinik	4.9	7.3		FALSE	FALSE	FALSE	FALSE	FALSE	FALSE	FALSE	FALSE	FALSE	2	2	2	2	1	1	1	1	1	1	1	1	1	1	1	1	1	1	1	1	1	1	1	1	1	FALSE	FALSE	FALSE	FALSE	FALSE	FALSE	FALSE	FALSE	FALSE	FALSE	FALSE
363	Bala Yaylaköy	7.8	8.7		FALSE	FALSE	FALSE	FALSE	FALSE	FALSE	FALSE	FALSE	FALSE	FALSE	FALSE	FALSE	FALSE	FALSE	FALSE	FALSE	FALSE	FALSE	FALSE	FALSE	FALSE	FALSE	FALSE	FALSE	FALSE	FALSE	FALSE	FALSE	FALSE	FALSE	FALSE	FALSE	FALSE	FALSE	FALSE	FALSE	FALSE	FALSE	1	1	1	1	1	1	1
364	Karacahasan	7.8	8.7		FALSE	FALSE	FALSE	FALSE	FALSE	FALSE	FALSE	FALSE	FALSE	FALSE	FALSE	FALSE	FALSE	FALSE	FALSE	FALSE	FALSE	FALSE	FALSE	FALSE	FALSE	FALSE	FALSE	FALSE	FALSE	FALSE	FALSE	FALSE	FALSE	FALSE	FALSE	FALSE	FALSE	FALSE	FALSE	FALSE	FALSE	FALSE	1	1	1	1	1	1	1
365	Eminova	7.8	8.7		FALSE	FALSE	FALSE	FALSE	FALSE	FALSE	FALSE	FALSE	FALSE	FALSE	FALSE	FALSE	FALSE	FALSE	FALSE	FALSE	FALSE	FALSE	FALSE	FALSE	FALSE	FALSE	FALSE	FALSE	FALSE	FALSE	FALSE	FALSE	FALSE	FALSE	FALSE	FALSE	FALSE	FALSE	FALSE	FALSE	FALSE	FALSE	1	1	1	1	1	1	1
366	Basbereket	7.8	8.7		FALSE	FALSE	FALSE	FALSE	FALSE	FALSE	FALSE	FALSE	FALSE	FALSE	FALSE	FALSE	FALSE	FALSE	FALSE	FALSE	FALSE	FALSE	FALSE	FALSE	FALSE	FALSE	FALSE	FALSE	FALSE	FALSE	FALSE	FALSE	FALSE	FALSE	FALSE	FALSE	FALSE	FALSE	FALSE	FALSE	FALSE	FALSE	1	1	1	1	1	1	1
367	Pinaryaka	7.3	7.8		FALSE	FALSE	FALSE	FALSE	FALSE	FALSE	FALSE	FALSE	FALSE	FALSE	FALSE	FALSE	FALSE	FALSE	FALSE	FALSE	FALSE	FALSE	FALSE	FALSE	FALSE	FALSE	FALSE	FALSE	FALSE	FALSE	FALSE	FALSE	FALSE	FALSE	FALSE	FALSE	FALSE	1	1	1	1	1	1	FALSE	FALSE	FALSE	FALSE	FALSE	FALSE
368	Kavakdere (Turolian)	7.3	7.8		FALSE	FALSE	FALSE	FALSE	FALSE	FALSE	FALSE	FALSE	FALSE	FALSE	FALSE	FALSE	FALSE	FALSE	FALSE	FALSE	FALSE	FALSE	FALSE	FALSE	FALSE	FALSE	FALSE	FALSE	FALSE	FALSE	FALSE	FALSE	FALSE	FALSE	FALSE	FALSE	FALSE	1	1	1	1	1	1	FALSE	FALSE	FALSE	FALSE	FALSE	FALSE
369	Inönü 2	9.7	11.1		FALSE	FALSE	FALSE	FALSE	FALSE	FALSE	FALSE	FALSE	FALSE	FALSE	FALSE	FALSE	FALSE	FALSE	FALSE	FALSE	FALSE	FALSE	FALSE	FALSE	FALSE	FALSE	FALSE	FALSE	FALSE	FALSE	FALSE	FALSE	FALSE	FALSE	FALSE	FALSE	FALSE	FALSE	FALSE	FALSE	FALSE	FALSE	FALSE	FALSE	FALSE	FALSE	FALSE	FALSE	FALSE
370	Amasya 2	4.9	7.3		FALSE	FALSE	FALSE	FALSE	FALSE	FALSE	FALSE	FALSE	FALSE	2	2	2	2	1	1	1	1	1	1	1	1	1	1	1	1	1	1	1	1	1	1	1	1	1	FALSE	FALSE	FALSE	FALSE	FALSE	FALSE	FALSE	FALSE	FALSE	FALSE	FALSE
371	Incirlikdere	8.7	9.7		FALSE	FALSE	FALSE	FALSE	FALSE	FALSE	FALSE	FALSE	FALSE	FALSE	FALSE	FALSE	FALSE	FALSE	FALSE	FALSE	FALSE	FALSE	FALSE	FALSE	FALSE	FALSE	FALSE	FALSE	FALSE	FALSE	FALSE	FALSE	FALSE	FALSE	FALSE	FALSE	FALSE	FALSE	FALSE	FALSE	FALSE	FALSE	FALSE	FALSE	FALSE	FALSE	FALSE	FALSE	FALSE
372	Musaköy	7.8	8.7		FALSE	FALSE	FALSE	FALSE	FALSE	FALSE	FALSE	FALSE	FALSE	FALSE	FALSE	FALSE	FALSE	FALSE	FALSE	FALSE	FALSE	FALSE	FALSE	FALSE	FALSE	FALSE	FALSE	FALSE	FALSE	FALSE	FALSE	FALSE	FALSE	FALSE	FALSE	FALSE	FALSE	FALSE	FALSE	FALSE	FALSE	FALSE	1	1	1	1	1	1	1
373	Gülpinar 3	7.3	7.8		FALSE	FALSE	FALSE	FALSE	FALSE	FALSE	FALSE	FALSE	FALSE	FALSE	FALSE	FALSE	FALSE	FALSE	FALSE	FALSE	FALSE	FALSE	FALSE	FALSE	FALSE	FALSE	FALSE	FALSE	FALSE	FALSE	FALSE	FALSE	FALSE	FALSE	FALSE	FALSE	FALSE	1	1	1	1	1	1	FALSE	FALSE	FALSE	FALSE	FALSE	FALSE
374	Corakyerler	7.8	8.7		FALSE	FALSE	FALSE	FALSE	FALSE	FALSE	FALSE	FALSE	FALSE	FALSE	FALSE	FALSE	FALSE	FALSE	FALSE	FALSE	FALSE	FALSE	FALSE	FALSE	FALSE	FALSE	FALSE	FALSE	FALSE	FALSE	FALSE	FALSE	FALSE	FALSE	FALSE	FALSE	FALSE	FALSE	FALSE	FALSE	FALSE	FALSE	1	1	1	1	1	1	1
375	Karacay	7.8	8.7		FALSE	FALSE	FALSE	FALSE	FALSE	FALSE	FALSE	FALSE	FALSE	FALSE	FALSE	FALSE	FALSE	FALSE	FALSE	FALSE	FALSE	FALSE	FALSE	FALSE	FALSE	FALSE	FALSE	FALSE	FALSE	FALSE	FALSE	FALSE	FALSE	FALSE	FALSE	FALSE	FALSE	FALSE	FALSE	FALSE	FALSE	FALSE	1	1	1	1	1	1	1
376	Sazak	7.3	7.8		FALSE	FALSE	FALSE	FALSE	FALSE	FALSE	FALSE	FALSE	FALSE	FALSE	FALSE	FALSE	FALSE	FALSE	FALSE	FALSE	FALSE	FALSE	FALSE	FALSE	FALSE	FALSE	FALSE	FALSE	FALSE	FALSE	FALSE	FALSE	FALSE	FALSE	FALSE	FALSE	FALSE	1	1	1	1	1	1	FALSE	FALSE	FALSE	FALSE	FALSE	FALSE
377	Sabuncubaglari 1	7.8	8.7		FALSE	FALSE	FALSE	FALSE	FALSE	FALSE	FALSE	FALSE	FALSE	FALSE	FALSE	FALSE	FALSE	FALSE	FALSE	FALSE	FALSE	FALSE	FALSE	FALSE	FALSE	FALSE	FALSE	FALSE	FALSE	FALSE	FALSE	FALSE	FALSE	FALSE	FALSE	FALSE	FALSE	FALSE	FALSE	FALSE	FALSE	FALSE	1	1	1	1	1	1	1
378	Dadasun 1	7.8	8.7		FALSE	FALSE	FALSE	FALSE	FALSE	FALSE	FALSE	FALSE	FALSE	FALSE	FALSE	FALSE	FALSE	FALSE	FALSE	FALSE	FALSE	FALSE	FALSE	FALSE	FALSE	FALSE	FALSE	FALSE	FALSE	FALSE	FALSE	FALSE	FALSE	FALSE	FALSE	FALSE	FALSE	FALSE	FALSE	FALSE	FALSE	FALSE	1	1	1	1	1	1	1
379	Cevril 1	7.8	8.7		FALSE	FALSE	FALSE	FALSE	FALSE	FALSE	FALSE	FALSE	FALSE	FALSE	FALSE	FALSE	FALSE	FALSE	FALSE	FALSE	FALSE	FALSE	FALSE	FALSE	FALSE	FALSE	FALSE	FALSE	FALSE	FALSE	FALSE	FALSE	FALSE	FALSE	FALSE	FALSE	FALSE	FALSE	FALSE	FALSE	FALSE	FALSE	1	1	1	1	1	1	1
380	Domuzdere	7.8	8.7		FALSE	FALSE	FALSE	FALSE	FALSE	FALSE	FALSE	FALSE	FALSE	FALSE	FALSE	FALSE	FALSE	FALSE	FALSE	FALSE	FALSE	FALSE	FALSE	FALSE	FALSE	FALSE	FALSE	FALSE	FALSE	FALSE	FALSE	FALSE	FALSE	FALSE	FALSE	FALSE	FALSE	FALSE	FALSE	FALSE	FALSE	FALSE	1	1	1	1	1	1	1
381	Mahmutlu	8.7	9.7		FALSE	FALSE	FALSE	FALSE	FALSE	FALSE	FALSE	FALSE	FALSE	FALSE	FALSE	FALSE	FALSE	FALSE	FALSE	FALSE	FALSE	FALSE	FALSE	FALSE	FALSE	FALSE	FALSE	FALSE	FALSE	FALSE	FALSE	FALSE	FALSE	FALSE	FALSE	FALSE	FALSE	FALSE	FALSE	FALSE	FALSE	FALSE	FALSE	FALSE	FALSE	FALSE	FALSE	FALSE	FALSE
382	Kizilören	7.3	7.8		FALSE	FALSE	FALSE	FALSE	FALSE	FALSE	FALSE	FALSE	FALSE	FALSE	FALSE	FALSE	FALSE	FALSE	FALSE	FALSE	FALSE	FALSE	FALSE	FALSE	FALSE	FALSE	FALSE	FALSE	FALSE	FALSE	FALSE	FALSE	FALSE	FALSE	FALSE	FALSE	FALSE	1	1	1	1	1	1	FALSE	FALSE	FALSE	FALSE	FALSE	FALSE
383	Asagicigil 2	7.8	8.7		FALSE	FALSE	FALSE	FALSE	FALSE	FALSE	FALSE	FALSE	FALSE	FALSE	FALSE	FALSE	FALSE	FALSE	FALSE	FALSE	FALSE	FALSE	FALSE	FALSE	FALSE	FALSE	FALSE	FALSE	FALSE	FALSE	FALSE	FALSE	FALSE	FALSE	FALSE	FALSE	FALSE	FALSE	FALSE	FALSE	FALSE	FALSE	1	1	1	1	1	1	1
384	Kayadibi 3	7.8	8.7		FALSE	FALSE	FALSE	FALSE	FALSE	FALSE	FALSE	FALSE	FALSE	FALSE	FALSE	FALSE	FALSE	FALSE	FALSE	FALSE	FALSE	FALSE	FALSE	FALSE	FALSE	FALSE	FALSE	FALSE	FALSE	FALSE	FALSE	FALSE	FALSE	FALSE	FALSE	FALSE	FALSE	FALSE	FALSE	FALSE	FALSE	FALSE	1	1	1	1	1	1	1
385	Harmancik	8.7	9.7		FALSE	FALSE	FALSE	FALSE	FALSE	FALSE	FALSE	FALSE	FALSE	FALSE	FALSE	FALSE	FALSE	FALSE	FALSE	FALSE	FALSE	FALSE	FALSE	FALSE	FALSE	FALSE	FALSE	FALSE	FALSE	FALSE	FALSE	FALSE	FALSE	FALSE	FALSE	FALSE	FALSE	FALSE	FALSE	FALSE	FALSE	FALSE	FALSE	FALSE	FALSE	FALSE	FALSE	FALSE	FALSE
386	Serefköy	7.3	7.8		FALSE	FALSE	FALSE	FALSE	FALSE	FALSE	FALSE	FALSE	FALSE	FALSE	FALSE	FALSE	FALSE	FALSE	FALSE	FALSE	FALSE	FALSE	FALSE	FALSE	FALSE	FALSE	FALSE	FALSE	FALSE	FALSE	FALSE	FALSE	FALSE	FALSE	FALSE	FALSE	FALSE	1	1	1	1	1	1	FALSE	FALSE	FALSE	FALSE	FALSE	FALSE
387	Salihpasalar 1	7.3	7.8		FALSE	FALSE	FALSE	FALSE	FALSE	FALSE	FALSE	FALSE	FALSE	FALSE	FALSE	FALSE	FALSE	FALSE	FALSE	FALSE	FALSE	FALSE	FALSE	FALSE	FALSE	FALSE	FALSE	FALSE	FALSE	FALSE	FALSE	FALSE	FALSE	FALSE	FALSE	FALSE	FALSE	1	1	1	1	1	1	FALSE	FALSE	FALSE	FALSE	FALSE	FALSE
388	Salihpasalar 2	7.3	7.8		FALSE	FALSE	FALSE	FALSE	FALSE	FALSE	FALSE	FALSE	FALSE	FALSE	FALSE	FALSE	FALSE	FALSE	FALSE	FALSE	FALSE	FALSE	FALSE	FALSE	FALSE	FALSE	FALSE	FALSE	FALSE	FALSE	FALSE	FALSE	FALSE	FALSE	FALSE	FALSE	FALSE	1	1	1	1	1	1	FALSE	FALSE	FALSE	FALSE	FALSE	FALSE
389	Elekci	7.3	7.8		FALSE	FALSE	FALSE	FALSE	FALSE	FALSE	FALSE	FALSE	FALSE	FALSE	FALSE	FALSE	FALSE	FALSE	FALSE	FALSE	FALSE	FALSE	FALSE	FALSE	FALSE	FALSE	FALSE	FALSE	FALSE	FALSE	FALSE	FALSE	FALSE	FALSE	FALSE	FALSE	FALSE	1	1	1	1	1	1	FALSE	FALSE	FALSE	FALSE	FALSE	FALSE
390	Özluce	7.3	7.8		FALSE	FALSE	FALSE	FALSE	FALSE	FALSE	FALSE	FALSE	FALSE	FALSE	FALSE	FALSE	FALSE	FALSE	FALSE	FALSE	FALSE	FALSE	FALSE	FALSE	FALSE	FALSE	FALSE	FALSE	FALSE	FALSE	FALSE	FALSE	FALSE	FALSE	FALSE	FALSE	FALSE	1	1	1	1	1	1	FALSE	FALSE	FALSE	FALSE	FALSE	FALSE
391	Yeniyaylacik	8.7	9.7		FALSE	FALSE	FALSE	FALSE	FALSE	FALSE	FALSE	FALSE	FALSE	FALSE	FALSE	FALSE	FALSE	FALSE	FALSE	FALSE	FALSE	FALSE	FALSE	FALSE	FALSE	FALSE	FALSE	FALSE	FALSE	FALSE	FALSE	FALSE	FALSE	FALSE	FALSE	FALSE	FALSE	FALSE	FALSE	FALSE	FALSE	FALSE	FALSE	FALSE	FALSE	FALSE	FALSE	FALSE	FALSE
392	Taskinpasa 1	4.9	7.3		FALSE	FALSE	FALSE	FALSE	FALSE	FALSE	FALSE	FALSE	FALSE	2	2	2	2	1	1	1	1	1	1	1	1	1	1	1	1	1	1	1	1	1	1	1	1	1	FALSE	FALSE	FALSE	FALSE	FALSE	FALSE	FALSE	FALSE	FALSE	FALSE	FALSE
393	Haliminhani 4	7.8	8.7		FALSE	FALSE	FALSE	FALSE	FALSE	FALSE	FALSE	FALSE	FALSE	FALSE	FALSE	FALSE	FALSE	FALSE	FALSE	FALSE	FALSE	FALSE	FALSE	FALSE	FALSE	FALSE	FALSE	FALSE	FALSE	FALSE	FALSE	FALSE	FALSE	FALSE	FALSE	FALSE	FALSE	FALSE	FALSE	FALSE	FALSE	FALSE	1	1	1	1	1	1	1
394	Sarihasan	7.8	8.7		FALSE	FALSE	FALSE	FALSE	FALSE	FALSE	FALSE	FALSE	FALSE	FALSE	FALSE	FALSE	FALSE	FALSE	FALSE	FALSE	FALSE	FALSE	FALSE	FALSE	FALSE	FALSE	FALSE	FALSE	FALSE	FALSE	FALSE	FALSE	FALSE	FALSE	FALSE	FALSE	FALSE	FALSE	FALSE	FALSE	FALSE	FALSE	1	1	1	1	1	1	1
395	Düzyayla	7.3	7.8		FALSE	FALSE	FALSE	FALSE	FALSE	FALSE	FALSE	FALSE	FALSE	FALSE	FALSE	FALSE	FALSE	FALSE	FALSE	FALSE	FALSE	FALSE	FALSE	FALSE	FALSE	FALSE	FALSE	FALSE	FALSE	FALSE	FALSE	FALSE	FALSE	FALSE	FALSE	FALSE	FALSE	1	1	1	1	1	1	FALSE	FALSE	FALSE	FALSE	FALSE	FALSE
396	Yulafli (CY)	8.7	9.7		FALSE	FALSE	FALSE	FALSE	FALSE	FALSE	FALSE	FALSE	FALSE	FALSE	FALSE	FALSE	FALSE	FALSE	FALSE	FALSE	FALSE	FALSE	FALSE	FALSE	FALSE	FALSE	FALSE	FALSE	FALSE	FALSE	FALSE	FALSE	FALSE	FALSE	FALSE	FALSE	FALSE	FALSE	FALSE	FALSE	FALSE	FALSE	FALSE	FALSE	FALSE	FALSE	FALSE	FALSE	FALSE
397	Arapli (Igdebaglar)	9.7	11.1		FALSE	FALSE	FALSE	FALSE	FALSE	FALSE	FALSE	FALSE	FALSE	FALSE	FALSE	FALSE	FALSE	FALSE	FALSE	FALSE	FALSE	FALSE	FALSE	FALSE	FALSE	FALSE	FALSE	FALSE	FALSE	FALSE	FALSE	FALSE	FALSE	FALSE	FALSE	FALSE	FALSE	FALSE	FALSE	FALSE	FALSE	FALSE	FALSE	FALSE	FALSE	FALSE	FALSE	FALSE	FALSE
398	Kemiklitepe 1,2	7.3	7.8		FALSE	FALSE	FALSE	FALSE	FALSE	FALSE	FALSE	FALSE	FALSE	FALSE	FALSE	FALSE	FALSE	FALSE	FALSE	FALSE	FALSE	FALSE	FALSE	FALSE	FALSE	FALSE	FALSE	FALSE	FALSE	FALSE	FALSE	FALSE	FALSE	FALSE	FALSE	FALSE	FALSE	1	1	1	1	1	1	FALSE	FALSE	FALSE	FALSE	FALSE	FALSE
399	Akcaköy (1-6)	9.7	11.1		FALSE	FALSE	FALSE	FALSE	FALSE	FALSE	FALSE	FALSE	FALSE	FALSE	FALSE	FALSE	FALSE	FALSE	FALSE	FALSE	FALSE	FALSE	FALSE	FALSE	FALSE	FALSE	FALSE	FALSE	FALSE	FALSE	FALSE	FALSE	FALSE	FALSE	FALSE	FALSE	FALSE	FALSE	FALSE	FALSE	FALSE	FALSE	FALSE	FALSE	FALSE	FALSE	FALSE	FALSE	FALSE
400	Akkasdagi	7.3	7.8		FALSE	FALSE	FALSE	FALSE	FALSE	FALSE	FALSE	FALSE	FALSE	FALSE	FALSE	FALSE	FALSE	FALSE	FALSE	FALSE	FALSE	FALSE	FALSE	FALSE	FALSE	FALSE	FALSE	FALSE	FALSE	FALSE	FALSE	FALSE	FALSE	FALSE	FALSE	FALSE	FALSE	1	1	1	1	1	1	FALSE	FALSE	FALSE	FALSE	FALSE	FALSE
401	Karatchok Dagh	7.3	7.8		FALSE	FALSE	FALSE	FALSE	FALSE	FALSE	FALSE	FALSE	FALSE	FALSE	FALSE	FALSE	FALSE	FALSE	FALSE	FALSE	FALSE	FALSE	FALSE	FALSE	FALSE	FALSE	FALSE	FALSE	FALSE	FALSE	FALSE	FALSE	FALSE	FALSE	FALSE	FALSE	FALSE	1	1	1	1	1	1	FALSE	FALSE	FALSE	FALSE	FALSE	FALSE
402	Toros-Menalla	4.9	7.3		FALSE	FALSE	FALSE	FALSE	FALSE	FALSE	FALSE	FALSE	FALSE	2	2	2	2	1	1	1	1	1	1	1	1	1	1	1	1	1	1	1	1	1	1	1	1	1	FALSE	FALSE	FALSE	FALSE	FALSE	FALSE	FALSE	FALSE	FALSE	FALSE	FALSE
403	Nyanza 2 (Chamtwara 34)	4.9	7.3		FALSE	FALSE	FALSE	FALSE	FALSE	FALSE	FALSE	FALSE	FALSE	2	2	2	2	1	1	1	1	1	1	1	1	1	1	1	1	1	1	1	1	1	1	1	1	1	FALSE	FALSE	FALSE	FALSE	FALSE	FALSE	FALSE	FALSE	FALSE	FALSE	FALSE
404	Ngorora 9	8.7	9.7		FALSE	FALSE	FALSE	FALSE	FALSE	FALSE	FALSE	FALSE	FALSE	FALSE	FALSE	FALSE	FALSE	FALSE	FALSE	FALSE	FALSE	FALSE	FALSE	FALSE	FALSE	FALSE	FALSE	FALSE	FALSE	FALSE	FALSE	FALSE	FALSE	FALSE	FALSE	FALSE	FALSE	FALSE	FALSE	FALSE	FALSE	FALSE	FALSE	FALSE	FALSE	FALSE	FALSE	FALSE	FALSE
405	Ngorora 12	8.7	9.7		FALSE	FALSE	FALSE	FALSE	FALSE	FALSE	FALSE	FALSE	FALSE	FALSE	FALSE	FALSE	FALSE	FALSE	FALSE	FALSE	FALSE	FALSE	FALSE	FALSE	FALSE	FALSE	FALSE	FALSE	FALSE	FALSE	FALSE	FALSE	FALSE	FALSE	FALSE	FALSE	FALSE	FALSE	FALSE	FALSE	FALSE	FALSE	FALSE	FALSE	FALSE	FALSE	FALSE	FALSE	FALSE
406	Lukeino	4.9	7.3		FALSE	FALSE	FALSE	FALSE	FALSE	FALSE	FALSE	FALSE	FALSE	2	2	2	2	1	1	1	1	1	1	1	1	1	1	1	1	1	1	1	1	1	1	1	1	1	FALSE	FALSE	FALSE	FALSE	FALSE	FALSE	FALSE	FALSE	FALSE	FALSE	FALSE
407	Lukeino 4	4.9	7.3		FALSE	FALSE	FALSE	FALSE	FALSE	FALSE	FALSE	FALSE	FALSE	2	2	2	2	1	1	1	1	1	1	1	1	1	1	1	1	1	1	1	1	1	1	1	1	1	FALSE	FALSE	FALSE	FALSE	FALSE	FALSE	FALSE	FALSE	FALSE	FALSE	FALSE
408	Ngeringerowa 1/1003	8.7	9.7		FALSE	FALSE	FALSE	FALSE	FALSE	FALSE	FALSE	FALSE	FALSE	FALSE	FALSE	FALSE	FALSE	FALSE	FALSE	FALSE	FALSE	FALSE	FALSE	FALSE	FALSE	FALSE	FALSE	FALSE	FALSE	FALSE	FALSE	FALSE	FALSE	FALSE	FALSE	FALSE	FALSE	FALSE	FALSE	FALSE	FALSE	FALSE	FALSE	FALSE	FALSE	FALSE	FALSE	FALSE	FALSE
409	Inolelo 1	4.9	7.3		FALSE	FALSE	FALSE	FALSE	FALSE	FALSE	FALSE	FALSE	FALSE	2	2	2	2	1	1	1	1	1	1	1	1	1	1	1	1	1	1	1	1	1	1	1	1	1	FALSE	FALSE	FALSE	FALSE	FALSE	FALSE	FALSE	FALSE	FALSE	FALSE	FALSE
410	Shoshamagai	4.9	7.3		FALSE	FALSE	FALSE	FALSE	FALSE	FALSE	FALSE	FALSE	FALSE	2	2	2	2	1	1	1	1	1	1	1	1	1	1	1	1	1	1	1	1	1	1	1	1	1	FALSE	FALSE	FALSE	FALSE	FALSE	FALSE	FALSE	FALSE	FALSE	FALSE	FALSE
411	Langebaanweg 2 (PPM)	4.9	7.3		FALSE	FALSE	FALSE	FALSE	FALSE	FALSE	FALSE	FALSE	FALSE	2	2	2	2	1	1	1	1	1	1	1	1	1	1	1	1	1	1	1	1	1	1	1	1	1	FALSE	FALSE	FALSE	FALSE	FALSE	FALSE	FALSE	FALSE	FALSE	FALSE	FALSE
412	Langebaanweg 3 (QSM)	4.9	7.3		FALSE	FALSE	FALSE	FALSE	FALSE	FALSE	FALSE	FALSE	FALSE	2	2	2	2	1	1	1	1	1	1	1	1	1	1	1	1	1	1	1	1	1	1	1	1	1	FALSE	FALSE	FALSE	FALSE	FALSE	FALSE	FALSE	FALSE	FALSE	FALSE	FALSE
413	Mwambiti 3	4.9	7.3		FALSE	FALSE	FALSE	FALSE	FALSE	FALSE	FALSE	FALSE	FALSE	2	2	2	2	1	1	1	1	1	1	1	1	1	1	1	1	1	1	1	1	1	1	1	1	1	FALSE	FALSE	FALSE	FALSE	FALSE	FALSE	FALSE	FALSE	FALSE	FALSE	FALSE
414	Inolelo 3	4.9	7.3		FALSE	FALSE	FALSE	FALSE	FALSE	FALSE	FALSE	FALSE	FALSE	2	2	2	2	1	1	1	1	1	1	1	1	1	1	1	1	1	1	1	1	1	1	1	1	1	FALSE	FALSE	FALSE	FALSE	FALSE	FALSE	FALSE	FALSE	FALSE	FALSE	FALSE
415	Darayaspoon	7.8	8.7		FALSE	FALSE	FALSE	FALSE	FALSE	FALSE	FALSE	FALSE	FALSE	FALSE	FALSE	FALSE	FALSE	FALSE	FALSE	FALSE	FALSE	FALSE	FALSE	FALSE	FALSE	FALSE	FALSE	FALSE	FALSE	FALSE	FALSE	FALSE	FALSE	FALSE	FALSE	FALSE	FALSE	FALSE	FALSE	FALSE	FALSE	FALSE	1	1	1	1	1	1	1
416	Marmar	7.3	7.8		FALSE	FALSE	FALSE	FALSE	FALSE	FALSE	FALSE	FALSE	FALSE	FALSE	FALSE	FALSE	FALSE	FALSE	FALSE	FALSE	FALSE	FALSE	FALSE	FALSE	FALSE	FALSE	FALSE	FALSE	FALSE	FALSE	FALSE	FALSE	FALSE	FALSE	FALSE	FALSE	FALSE	1	1	1	1	1	1	FALSE	FALSE	FALSE	FALSE	FALSE	FALSE
417	Hangmon	7.8	8.7		FALSE	FALSE	FALSE	FALSE	FALSE	FALSE	FALSE	FALSE	FALSE	FALSE	FALSE	FALSE	FALSE	FALSE	FALSE	FALSE	FALSE	FALSE	FALSE	FALSE	FALSE	FALSE	FALSE	FALSE	FALSE	FALSE	FALSE	FALSE	FALSE	FALSE	FALSE	FALSE	FALSE	FALSE	FALSE	FALSE	FALSE	FALSE	1	1	1	1	1	1	1
418	Nombrevilla-9	9.7	11.1		FALSE	FALSE	FALSE	FALSE	FALSE	FALSE	FALSE	FALSE	FALSE	FALSE	FALSE	FALSE	FALSE	FALSE	FALSE	FALSE	FALSE	FALSE	FALSE	FALSE	FALSE	FALSE	FALSE	FALSE	FALSE	FALSE	FALSE	FALSE	FALSE	FALSE	FALSE	FALSE	FALSE	FALSE	FALSE	FALSE	FALSE	FALSE	FALSE	FALSE	FALSE	FALSE	FALSE	FALSE	FALSE
419	Salihpasalar	7.3	7.8		FALSE	FALSE	FALSE	FALSE	FALSE	FALSE	FALSE	FALSE	FALSE	FALSE	FALSE	FALSE	FALSE	FALSE	FALSE	FALSE	FALSE	FALSE	FALSE	FALSE	FALSE	FALSE	FALSE	FALSE	FALSE	FALSE	FALSE	FALSE	FALSE	FALSE	FALSE	FALSE	FALSE	1	1	1	1	1	1	FALSE	FALSE	FALSE	FALSE	FALSE	FALSE
420	Kalimantsi-Pehtsata	7.3	7.8		FALSE	FALSE	FALSE	FALSE	FALSE	FALSE	FALSE	FALSE	FALSE	FALSE	FALSE	FALSE	FALSE	FALSE	FALSE	FALSE	FALSE	FALSE	FALSE	FALSE	FALSE	FALSE	FALSE	FALSE	FALSE	FALSE	FALSE	FALSE	FALSE	FALSE	FALSE	FALSE	FALSE	1	1	1	1	1	1	FALSE	FALSE	FALSE	FALSE	FALSE	FALSE
421	Binxian	7.3	7.8		FALSE	FALSE	FALSE	FALSE	FALSE	FALSE	FALSE	FALSE	FALSE	FALSE	FALSE	FALSE	FALSE	FALSE	FALSE	FALSE	FALSE	FALSE	FALSE	FALSE	FALSE	FALSE	FALSE	FALSE	FALSE	FALSE	FALSE	FALSE	FALSE	FALSE	FALSE	FALSE	FALSE	1	1	1	1	1	1	FALSE	FALSE	FALSE	FALSE	FALSE	FALSE
422	Dongxiang-wangji	9.7	11.1		FALSE	FALSE	FALSE	FALSE	FALSE	FALSE	FALSE	FALSE	FALSE	FALSE	FALSE	FALSE	FALSE	FALSE	FALSE	FALSE	FALSE	FALSE	FALSE	FALSE	FALSE	FALSE	FALSE	FALSE	FALSE	FALSE	FALSE	FALSE	FALSE	FALSE	FALSE	FALSE	FALSE	FALSE	FALSE	FALSE	FALSE	FALSE	FALSE	FALSE	FALSE	FALSE	FALSE	FALSE	FALSE
423	Fugu-Laogaochuan-wangdafuliang	8.7	9.7		FALSE	FALSE	FALSE	FALSE	FALSE	FALSE	FALSE	FALSE	FALSE	FALSE	FALSE	FALSE	FALSE	FALSE	FALSE	FALSE	FALSE	FALSE	FALSE	FALSE	FALSE	FALSE	FALSE	FALSE	FALSE	FALSE	FALSE	FALSE	FALSE	FALSE	FALSE	FALSE	FALSE	FALSE	FALSE	FALSE	FALSE	FALSE	FALSE	FALSE	FALSE	FALSE	FALSE	FALSE	FALSE
424	Fu-Ku-Lok.51	7.3	7.8		FALSE	FALSE	FALSE	FALSE	FALSE	FALSE	FALSE	FALSE	FALSE	FALSE	FALSE	FALSE	FALSE	FALSE	FALSE	FALSE	FALSE	FALSE	FALSE	FALSE	FALSE	FALSE	FALSE	FALSE	FALSE	FALSE	FALSE	FALSE	FALSE	FALSE	FALSE	FALSE	FALSE	1	1	1	1	1	1	FALSE	FALSE	FALSE	FALSE	FALSE	FALSE
425	Hsin-An-Loc.12	4.9	7.3		FALSE	FALSE	FALSE	FALSE	FALSE	FALSE	FALSE	FALSE	FALSE	2	2	2	2	1	1	1	1	1	1	1	1	1	1	1	1	1	1	1	1	1	1	1	1	1	FALSE	FALSE	FALSE	FALSE	FALSE	FALSE	FALSE	FALSE	FALSE	FALSE	FALSE
426	Huade-Heishatou	7.3	7.8		FALSE	FALSE	FALSE	FALSE	FALSE	FALSE	FALSE	FALSE	FALSE	FALSE	FALSE	FALSE	FALSE	FALSE	FALSE	FALSE	FALSE	FALSE	FALSE	FALSE	FALSE	FALSE	FALSE	FALSE	FALSE	FALSE	FALSE	FALSE	FALSE	FALSE	FALSE	FALSE	FALSE	1	1	1	1	1	1	FALSE	FALSE	FALSE	FALSE	FALSE	FALSE
427	Huade-Tuchetse	7.3	7.8		FALSE	FALSE	FALSE	FALSE	FALSE	FALSE	FALSE	FALSE	FALSE	FALSE	FALSE	FALSE	FALSE	FALSE	FALSE	FALSE	FALSE	FALSE	FALSE	FALSE	FALSE	FALSE	FALSE	FALSE	FALSE	FALSE	FALSE	FALSE	FALSE	FALSE	FALSE	FALSE	FALSE	1	1	1	1	1	1	FALSE	FALSE	FALSE	FALSE	FALSE	FALSE
428	Jilong	7.3	7.8		FALSE	FALSE	FALSE	FALSE	FALSE	FALSE	FALSE	FALSE	FALSE	FALSE	FALSE	FALSE	FALSE	FALSE	FALSE	FALSE	FALSE	FALSE	FALSE	FALSE	FALSE	FALSE	FALSE	FALSE	FALSE	FALSE	FALSE	FALSE	FALSE	FALSE	FALSE	FALSE	FALSE	1	1	1	1	1	1	FALSE	FALSE	FALSE	FALSE	FALSE	FALSE
429	Jingmen-Yangjiaji-Dingjiapo	7.3	7.8		FALSE	FALSE	FALSE	FALSE	FALSE	FALSE	FALSE	FALSE	FALSE	FALSE	FALSE	FALSE	FALSE	FALSE	FALSE	FALSE	FALSE	FALSE	FALSE	FALSE	FALSE	FALSE	FALSE	FALSE	FALSE	FALSE	FALSE	FALSE	FALSE	FALSE	FALSE	FALSE	FALSE	1	1	1	1	1	1	FALSE	FALSE	FALSE	FALSE	FALSE	FALSE
430	Jungar-Yaogou	7.3	7.8		FALSE	FALSE	FALSE	FALSE	FALSE	FALSE	FALSE	FALSE	FALSE	FALSE	FALSE	FALSE	FALSE	FALSE	FALSE	FALSE	FALSE	FALSE	FALSE	FALSE	FALSE	FALSE	FALSE	FALSE	FALSE	FALSE	FALSE	FALSE	FALSE	FALSE	FALSE	FALSE	FALSE	1	1	1	1	1	1	FALSE	FALSE	FALSE	FALSE	FALSE	FALSE
431	Qingyang-Lok.115	4.9	7.3		FALSE	FALSE	FALSE	FALSE	FALSE	FALSE	FALSE	FALSE	FALSE	2	2	2	2	1	1	1	1	1	1	1	1	1	1	1	1	1	1	1	1	1	1	1	1	1	FALSE	FALSE	FALSE	FALSE	FALSE	FALSE	FALSE	FALSE	FALSE	FALSE	FALSE
432	Qingyang-Lok.116	4.9	7.3		FALSE	FALSE	FALSE	FALSE	FALSE	FALSE	FALSE	FALSE	FALSE	2	2	2	2	1	1	1	1	1	1	1	1	1	1	1	1	1	1	1	1	1	1	1	1	1	FALSE	FALSE	FALSE	FALSE	FALSE	FALSE	FALSE	FALSE	FALSE	FALSE	FALSE
433	Lantian-12	9.7	11.1		FALSE	FALSE	FALSE	FALSE	FALSE	FALSE	FALSE	FALSE	FALSE	FALSE	FALSE	FALSE	FALSE	FALSE	FALSE	FALSE	FALSE	FALSE	FALSE	FALSE	FALSE	FALSE	FALSE	FALSE	FALSE	FALSE	FALSE	FALSE	FALSE	FALSE	FALSE	FALSE	FALSE	FALSE	FALSE	FALSE	FALSE	FALSE	FALSE	FALSE	FALSE	FALSE	FALSE	FALSE	FALSE
434	Lantian-30	7.8	8.7		FALSE	FALSE	FALSE	FALSE	FALSE	FALSE	FALSE	FALSE	FALSE	FALSE	FALSE	FALSE	FALSE	FALSE	FALSE	FALSE	FALSE	FALSE	FALSE	FALSE	FALSE	FALSE	FALSE	FALSE	FALSE	FALSE	FALSE	FALSE	FALSE	FALSE	FALSE	FALSE	FALSE	FALSE	FALSE	FALSE	FALSE	FALSE	1	1	1	1	1	1	1
435	Lantian-42	4.9	7.3		FALSE	FALSE	FALSE	FALSE	FALSE	FALSE	FALSE	FALSE	FALSE	2	2	2	2	1	1	1	1	1	1	1	1	1	1	1	1	1	1	1	1	1	1	1	1	1	FALSE	FALSE	FALSE	FALSE	FALSE	FALSE	FALSE	FALSE	FALSE	FALSE	FALSE
436	Lantian-44	4.9	7.3		FALSE	FALSE	FALSE	FALSE	FALSE	FALSE	FALSE	FALSE	FALSE	2	2	2	2	1	1	1	1	1	1	1	1	1	1	1	1	1	1	1	1	1	1	1	1	1	FALSE	FALSE	FALSE	FALSE	FALSE	FALSE	FALSE	FALSE	FALSE	FALSE	FALSE
437	Lantian-shuijiazui-L1(s5)	9.7	11.1		FALSE	FALSE	FALSE	FALSE	FALSE	FALSE	FALSE	FALSE	FALSE	FALSE	FALSE	FALSE	FALSE	FALSE	FALSE	FALSE	FALSE	FALSE	FALSE	FALSE	FALSE	FALSE	FALSE	FALSE	FALSE	FALSE	FALSE	FALSE	FALSE	FALSE	FALSE	FALSE	FALSE	FALSE	FALSE	FALSE	FALSE	FALSE	FALSE	FALSE	FALSE	FALSE	FALSE	FALSE	FALSE
438	Lantian-shuijiazui-L4(s6)	9.7	11.1		FALSE	FALSE	FALSE	FALSE	FALSE	FALSE	FALSE	FALSE	FALSE	FALSE	FALSE	FALSE	FALSE	FALSE	FALSE	FALSE	FALSE	FALSE	FALSE	FALSE	FALSE	FALSE	FALSE	FALSE	FALSE	FALSE	FALSE	FALSE	FALSE	FALSE	FALSE	FALSE	FALSE	FALSE	FALSE	FALSE	FALSE	FALSE	FALSE	FALSE	FALSE	FALSE	FALSE	FALSE	FALSE
439	Lantian-shuijiazui-s4	9.7	11.1		FALSE	FALSE	FALSE	FALSE	FALSE	FALSE	FALSE	FALSE	FALSE	FALSE	FALSE	FALSE	FALSE	FALSE	FALSE	FALSE	FALSE	FALSE	FALSE	FALSE	FALSE	FALSE	FALSE	FALSE	FALSE	FALSE	FALSE	FALSE	FALSE	FALSE	FALSE	FALSE	FALSE	FALSE	FALSE	FALSE	FALSE	FALSE	FALSE	FALSE	FALSE	FALSE	FALSE	FALSE	FALSE
440	Pao-Te-Lok.108	4.9	7.3		FALSE	FALSE	FALSE	FALSE	FALSE	FALSE	FALSE	FALSE	FALSE	2	2	2	2	1	1	1	1	1	1	1	1	1	1	1	1	1	1	1	1	1	1	1	1	1	FALSE	FALSE	FALSE	FALSE	FALSE	FALSE	FALSE	FALSE	FALSE	FALSE	FALSE
441	Pao-Te-Lok.109	4.9	7.3		FALSE	FALSE	FALSE	FALSE	FALSE	FALSE	FALSE	FALSE	FALSE	2	2	2	2	1	1	1	1	1	1	1	1	1	1	1	1	1	1	1	1	1	1	1	1	1	FALSE	FALSE	FALSE	FALSE	FALSE	FALSE	FALSE	FALSE	FALSE	FALSE	FALSE
442	Pao-Te-Lok.110	4.9	7.3		FALSE	FALSE	FALSE	FALSE	FALSE	FALSE	FALSE	FALSE	FALSE	2	2	2	2	1	1	1	1	1	1	1	1	1	1	1	1	1	1	1	1	1	1	1	1	1	FALSE	FALSE	FALSE	FALSE	FALSE	FALSE	FALSE	FALSE	FALSE	FALSE	FALSE
443	Pao-Te-Lok.30	4.9	7.3		FALSE	FALSE	FALSE	FALSE	FALSE	FALSE	FALSE	FALSE	FALSE	2	2	2	2	1	1	1	1	1	1	1	1	1	1	1	1	1	1	1	1	1	1	1	1	1	FALSE	FALSE	FALSE	FALSE	FALSE	FALSE	FALSE	FALSE	FALSE	FALSE	FALSE
444	Pao-Te-Lok.31	4.9	7.3		FALSE	FALSE	FALSE	FALSE	FALSE	FALSE	FALSE	FALSE	FALSE	2	2	2	2	1	1	1	1	1	1	1	1	1	1	1	1	1	1	1	1	1	1	1	1	1	FALSE	FALSE	FALSE	FALSE	FALSE	FALSE	FALSE	FALSE	FALSE	FALSE	FALSE
445	Pao-Te-Lok.43	4.9	7.3		FALSE	FALSE	FALSE	FALSE	FALSE	FALSE	FALSE	FALSE	FALSE	2	2	2	2	1	1	1	1	1	1	1	1	1	1	1	1	1	1	1	1	1	1	1	1	1	FALSE	FALSE	FALSE	FALSE	FALSE	FALSE	FALSE	FALSE	FALSE	FALSE	FALSE
446	Pao-Te-Lok.44	4.9	7.3		FALSE	FALSE	FALSE	FALSE	FALSE	FALSE	FALSE	FALSE	FALSE	2	2	2	2	1	1	1	1	1	1	1	1	1	1	1	1	1	1	1	1	1	1	1	1	1	FALSE	FALSE	FALSE	FALSE	FALSE	FALSE	FALSE	FALSE	FALSE	FALSE	FALSE
447	Pao-Te-Lok.49	4.9	7.3		FALSE	FALSE	FALSE	FALSE	FALSE	FALSE	FALSE	FALSE	FALSE	2	2	2	2	1	1	1	1	1	1	1	1	1	1	1	1	1	1	1	1	1	1	1	1	1	FALSE	FALSE	FALSE	FALSE	FALSE	FALSE	FALSE	FALSE	FALSE	FALSE	FALSE
448	Pao-Te-Lok.52	4.9	7.3		FALSE	FALSE	FALSE	FALSE	FALSE	FALSE	FALSE	FALSE	FALSE	2	2	2	2	1	1	1	1	1	1	1	1	1	1	1	1	1	1	1	1	1	1	1	1	1	FALSE	FALSE	FALSE	FALSE	FALSE	FALSE	FALSE	FALSE	FALSE	FALSE	FALSE
449	Qinan-Chenggoucun	7.8	8.7		FALSE	FALSE	FALSE	FALSE	FALSE	FALSE	FALSE	FALSE	FALSE	FALSE	FALSE	FALSE	FALSE	FALSE	FALSE	FALSE	FALSE	FALSE	FALSE	FALSE	FALSE	FALSE	FALSE	FALSE	FALSE	FALSE	FALSE	FALSE	FALSE	FALSE	FALSE	FALSE	FALSE	FALSE	FALSE	FALSE	FALSE	FALSE	1	1	1	1	1	1	1
450	Songshan-Loc.2	4.9	7.3		FALSE	FALSE	FALSE	FALSE	FALSE	FALSE	FALSE	FALSE	FALSE	2	2	2	2	1	1	1	1	1	1	1	1	1	1	1	1	1	1	1	1	1	1	1	1	1	FALSE	FALSE	FALSE	FALSE	FALSE	FALSE	FALSE	FALSE	FALSE	FALSE	FALSE
451	Songshan-Loc.3	4.9	7.3		FALSE	FALSE	FALSE	FALSE	FALSE	FALSE	FALSE	FALSE	FALSE	2	2	2	2	1	1	1	1	1	1	1	1	1	1	1	1	1	1	1	1	1	1	1	1	1	FALSE	FALSE	FALSE	FALSE	FALSE	FALSE	FALSE	FALSE	FALSE	FALSE	FALSE
452	Wudu-longjiagou	7.3	7.8		FALSE	FALSE	FALSE	FALSE	FALSE	FALSE	FALSE	FALSE	FALSE	FALSE	FALSE	FALSE	FALSE	FALSE	FALSE	FALSE	FALSE	FALSE	FALSE	FALSE	FALSE	FALSE	FALSE	FALSE	FALSE	FALSE	FALSE	FALSE	FALSE	FALSE	FALSE	FALSE	FALSE	1	1	1	1	1	1	FALSE	FALSE	FALSE	FALSE	FALSE	FALSE
453	Wu-Hsiang-Loc.71	4.9	7.3		FALSE	FALSE	FALSE	FALSE	FALSE	FALSE	FALSE	FALSE	FALSE	2	2	2	2	1	1	1	1	1	1	1	1	1	1	1	1	1	1	1	1	1	1	1	1	1	FALSE	FALSE	FALSE	FALSE	FALSE	FALSE	FALSE	FALSE	FALSE	FALSE	FALSE
454	Wu-Hsiang-loc.78	4.9	7.3		FALSE	FALSE	FALSE	FALSE	FALSE	FALSE	FALSE	FALSE	FALSE	2	2	2	2	1	1	1	1	1	1	1	1	1	1	1	1	1	1	1	1	1	1	1	1	1	FALSE	FALSE	FALSE	FALSE	FALSE	FALSE	FALSE	FALSE	FALSE	FALSE	FALSE
455	Wu-Hsiang-Lok.70	4.9	7.3		FALSE	FALSE	FALSE	FALSE	FALSE	FALSE	FALSE	FALSE	FALSE	2	2	2	2	1	1	1	1	1	1	1	1	1	1	1	1	1	1	1	1	1	1	1	1	1	FALSE	FALSE	FALSE	FALSE	FALSE	FALSE	FALSE	FALSE	FALSE	FALSE	FALSE
456	Wu-Hsiang-Lok.73	4.9	7.3		FALSE	FALSE	FALSE	FALSE	FALSE	FALSE	FALSE	FALSE	FALSE	2	2	2	2	1	1	1	1	1	1	1	1	1	1	1	1	1	1	1	1	1	1	1	1	1	FALSE	FALSE	FALSE	FALSE	FALSE	FALSE	FALSE	FALSE	FALSE	FALSE	FALSE
457	Zhangqiu-Balouhe	7.3	7.8		FALSE	FALSE	FALSE	FALSE	FALSE	FALSE	FALSE	FALSE	FALSE	FALSE	FALSE	FALSE	FALSE	FALSE	FALSE	FALSE	FALSE	FALSE	FALSE	FALSE	FALSE	FALSE	FALSE	FALSE	FALSE	FALSE	FALSE	FALSE	FALSE	FALSE	FALSE	FALSE	FALSE	1	1	1	1	1	1	FALSE	FALSE	FALSE	FALSE	FALSE	FALSE
458	Fugu-Laogaochuan-lamagou	8.7	9.7		FALSE	FALSE	FALSE	FALSE	FALSE	FALSE	FALSE	FALSE	FALSE	FALSE	FALSE	FALSE	FALSE	FALSE	FALSE	FALSE	FALSE	FALSE	FALSE	FALSE	FALSE	FALSE	FALSE	FALSE	FALSE	FALSE	FALSE	FALSE	FALSE	FALSE	FALSE	FALSE	FALSE	FALSE	FALSE	FALSE	FALSE	FALSE	FALSE	FALSE	FALSE	FALSE	FALSE	FALSE	FALSE
459	Fugu-Laogaochuan-miaoliang	4.9	7.3		FALSE	FALSE	FALSE	FALSE	FALSE	FALSE	FALSE	FALSE	FALSE	2	2	2	2	1	1	1	1	1	1	1	1	1	1	1	1	1	1	1	1	1	1	1	1	1	FALSE	FALSE	FALSE	FALSE	FALSE	FALSE	FALSE	FALSE	FALSE	FALSE	FALSE
460	Bahe	7.8	8.7		FALSE	FALSE	FALSE	FALSE	FALSE	FALSE	FALSE	FALSE	FALSE	FALSE	FALSE	FALSE	FALSE	FALSE	FALSE	FALSE	FALSE	FALSE	FALSE	FALSE	FALSE	FALSE	FALSE	FALSE	FALSE	FALSE	FALSE	FALSE	FALSE	FALSE	FALSE	FALSE	FALSE	FALSE	FALSE	FALSE	FALSE	FALSE	1	1	1	1	1	1	1
461	Santiga (Sabadell)	9.7	11.1		FALSE	FALSE	FALSE	FALSE	FALSE	FALSE	FALSE	FALSE	FALSE	FALSE	FALSE	FALSE	FALSE	FALSE	FALSE	FALSE	FALSE	FALSE	FALSE	FALSE	FALSE	FALSE	FALSE	FALSE	FALSE	FALSE	FALSE	FALSE	FALSE	FALSE	FALSE	FALSE	FALSE	FALSE	FALSE	FALSE	FALSE	FALSE	FALSE	FALSE	FALSE	FALSE	FALSE	FALSE	FALSE
462	Creu Conill 20	9.7	11.1		FALSE	FALSE	FALSE	FALSE	FALSE	FALSE	FALSE	FALSE	FALSE	FALSE	FALSE	FALSE	FALSE	FALSE	FALSE	FALSE	FALSE	FALSE	FALSE	FALSE	FALSE	FALSE	FALSE	FALSE	FALSE	FALSE	FALSE	FALSE	FALSE	FALSE	FALSE	FALSE	FALSE	FALSE	FALSE	FALSE	FALSE	FALSE	FALSE	FALSE	FALSE	FALSE	FALSE	FALSE	FALSE
463	Baynunah	7.3	7.8		FALSE	FALSE	FALSE	FALSE	FALSE	FALSE	FALSE	FALSE	FALSE	FALSE	FALSE	FALSE	FALSE	FALSE	FALSE	FALSE	FALSE	FALSE	FALSE	FALSE	FALSE	FALSE	FALSE	FALSE	FALSE	FALSE	FALSE	FALSE	FALSE	FALSE	FALSE	FALSE	FALSE	1	1	1	1	1	1	FALSE	FALSE	FALSE	FALSE	FALSE	FALSE
464	Perivolaki	7.3	7.8		FALSE	FALSE	FALSE	FALSE	FALSE	FALSE	FALSE	FALSE	FALSE	FALSE	FALSE	FALSE	FALSE	FALSE	FALSE	FALSE	FALSE	FALSE	FALSE	FALSE	FALSE	FALSE	FALSE	FALSE	FALSE	FALSE	FALSE	FALSE	FALSE	FALSE	FALSE	FALSE	FALSE	1	1	1	1	1	1	FALSE	FALSE	FALSE	FALSE	FALSE	FALSE
465	Samos-Qx	7.8	8.7		FALSE	FALSE	FALSE	FALSE	FALSE	FALSE	FALSE	FALSE	FALSE	FALSE	FALSE	FALSE	FALSE	FALSE	FALSE	FALSE	FALSE	FALSE	FALSE	FALSE	FALSE	FALSE	FALSE	FALSE	FALSE	FALSE	FALSE	FALSE	FALSE	FALSE	FALSE	FALSE	FALSE	FALSE	FALSE	FALSE	FALSE	FALSE	1	1	1	1	1	1	1
466	Samos-Q6	7.8	8.7		FALSE	FALSE	FALSE	FALSE	FALSE	FALSE	FALSE	FALSE	FALSE	FALSE	FALSE	FALSE	FALSE	FALSE	FALSE	FALSE	FALSE	FALSE	FALSE	FALSE	FALSE	FALSE	FALSE	FALSE	FALSE	FALSE	FALSE	FALSE	FALSE	FALSE	FALSE	FALSE	FALSE	FALSE	FALSE	FALSE	FALSE	FALSE	1	1	1	1	1	1	1
467	Samos-Q5	7.3	7.8		FALSE	FALSE	FALSE	FALSE	FALSE	FALSE	FALSE	FALSE	FALSE	FALSE	FALSE	FALSE	FALSE	FALSE	FALSE	FALSE	FALSE	FALSE	FALSE	FALSE	FALSE	FALSE	FALSE	FALSE	FALSE	FALSE	FALSE	FALSE	FALSE	FALSE	FALSE	FALSE	FALSE	1	1	1	1	1	1	FALSE	FALSE	FALSE	FALSE	FALSE	FALSE
468	Kerassia 1	7.3	7.8		FALSE	FALSE	FALSE	FALSE	FALSE	FALSE	FALSE	FALSE	FALSE	FALSE	FALSE	FALSE	FALSE	FALSE	FALSE	FALSE	FALSE	FALSE	FALSE	FALSE	FALSE	FALSE	FALSE	FALSE	FALSE	FALSE	FALSE	FALSE	FALSE	FALSE	FALSE	FALSE	FALSE	1	1	1	1	1	1	FALSE	FALSE	FALSE	FALSE	FALSE	FALSE
469	Kerassia 4	7.3	7.8		FALSE	FALSE	FALSE	FALSE	FALSE	FALSE	FALSE	FALSE	FALSE	FALSE	FALSE	FALSE	FALSE	FALSE	FALSE	FALSE	FALSE	FALSE	FALSE	FALSE	FALSE	FALSE	FALSE	FALSE	FALSE	FALSE	FALSE	FALSE	FALSE	FALSE	FALSE	FALSE	FALSE	1	1	1	1	1	1	FALSE	FALSE	FALSE	FALSE	FALSE	FALSE
470	Kocherinovo 1	7.8	8.7		FALSE	FALSE	FALSE	FALSE	FALSE	FALSE	FALSE	FALSE	FALSE	FALSE	FALSE	FALSE	FALSE	FALSE	FALSE	FALSE	FALSE	FALSE	FALSE	FALSE	FALSE	FALSE	FALSE	FALSE	FALSE	FALSE	FALSE	FALSE	FALSE	FALSE	FALSE	FALSE	FALSE	FALSE	FALSE	FALSE	FALSE	FALSE	1	1	1	1	1	1	1
471	Kocherinovo 2	7.8	8.7		FALSE	FALSE	FALSE	FALSE	FALSE	FALSE	FALSE	FALSE	FALSE	FALSE	FALSE	FALSE	FALSE	FALSE	FALSE	FALSE	FALSE	FALSE	FALSE	FALSE	FALSE	FALSE	FALSE	FALSE	FALSE	FALSE	FALSE	FALSE	FALSE	FALSE	FALSE	FALSE	FALSE	FALSE	FALSE	FALSE	FALSE	FALSE	1	1	1	1	1	1	1
472	Strumyani 1	7.8	8.7		FALSE	FALSE	FALSE	FALSE	FALSE	FALSE	FALSE	FALSE	FALSE	FALSE	FALSE	FALSE	FALSE	FALSE	FALSE	FALSE	FALSE	FALSE	FALSE	FALSE	FALSE	FALSE	FALSE	FALSE	FALSE	FALSE	FALSE	FALSE	FALSE	FALSE	FALSE	FALSE	FALSE	FALSE	FALSE	FALSE	FALSE	FALSE	1	1	1	1	1	1	1
473	Strumyani 2	7.8	8.7		FALSE	FALSE	FALSE	FALSE	FALSE	FALSE	FALSE	FALSE	FALSE	FALSE	FALSE	FALSE	FALSE	FALSE	FALSE	FALSE	FALSE	FALSE	FALSE	FALSE	FALSE	FALSE	FALSE	FALSE	FALSE	FALSE	FALSE	FALSE	FALSE	FALSE	FALSE	FALSE	FALSE	FALSE	FALSE	FALSE	FALSE	FALSE	1	1	1	1	1	1	1
474	Ravin X	7.3	7.8		FALSE	FALSE	FALSE	FALSE	FALSE	FALSE	FALSE	FALSE	FALSE	FALSE	FALSE	FALSE	FALSE	FALSE	FALSE	FALSE	FALSE	FALSE	FALSE	FALSE	FALSE	FALSE	FALSE	FALSE	FALSE	FALSE	FALSE	FALSE	FALSE	FALSE	FALSE	FALSE	FALSE	1	1	1	1	1	1	FALSE	FALSE	FALSE	FALSE	FALSE	FALSE
475	Mytilinii 4	7.3	7.8		FALSE	FALSE	FALSE	FALSE	FALSE	FALSE	FALSE	FALSE	FALSE	FALSE	FALSE	FALSE	FALSE	FALSE	FALSE	FALSE	FALSE	FALSE	FALSE	FALSE	FALSE	FALSE	FALSE	FALSE	FALSE	FALSE	FALSE	FALSE	FALSE	FALSE	FALSE	FALSE	FALSE	1	1	1	1	1	1	FALSE	FALSE	FALSE	FALSE	FALSE	FALSE
476	Mytilinii 3	7.3	7.8		FALSE	FALSE	FALSE	FALSE	FALSE	FALSE	FALSE	FALSE	FALSE	FALSE	FALSE	FALSE	FALSE	FALSE	FALSE	FALSE	FALSE	FALSE	FALSE	FALSE	FALSE	FALSE	FALSE	FALSE	FALSE	FALSE	FALSE	FALSE	FALSE	FALSE	FALSE	FALSE	FALSE	1	1	1	1	1	1	FALSE	FALSE	FALSE	FALSE	FALSE	FALSE
477	Mytilinii 1A	7.3	7.8		FALSE	FALSE	FALSE	FALSE	FALSE	FALSE	FALSE	FALSE	FALSE	FALSE	FALSE	FALSE	FALSE	FALSE	FALSE	FALSE	FALSE	FALSE	FALSE	FALSE	FALSE	FALSE	FALSE	FALSE	FALSE	FALSE	FALSE	FALSE	FALSE	FALSE	FALSE	FALSE	FALSE	1	1	1	1	1	1	FALSE	FALSE	FALSE	FALSE	FALSE	FALSE
478	Mytilinii 1B	7.3	7.8		FALSE	FALSE	FALSE	FALSE	FALSE	FALSE	FALSE	FALSE	FALSE	FALSE	FALSE	FALSE	FALSE	FALSE	FALSE	FALSE	FALSE	FALSE	FALSE	FALSE	FALSE	FALSE	FALSE	FALSE	FALSE	FALSE	FALSE	FALSE	FALSE	FALSE	FALSE	FALSE	FALSE	1	1	1	1	1	1	FALSE	FALSE	FALSE	FALSE	FALSE	FALSE
479	Mytilinii 1C	7.3	7.8		FALSE	FALSE	FALSE	FALSE	FALSE	FALSE	FALSE	FALSE	FALSE	FALSE	FALSE	FALSE	FALSE	FALSE	FALSE	FALSE	FALSE	FALSE	FALSE	FALSE	FALSE	FALSE	FALSE	FALSE	FALSE	FALSE	FALSE	FALSE	FALSE	FALSE	FALSE	FALSE	FALSE	1	1	1	1	1	1	FALSE	FALSE	FALSE	FALSE	FALSE	FALSE
480	Achmet Aga	7.3	7.8		FALSE	FALSE	FALSE	FALSE	FALSE	FALSE	FALSE	FALSE	FALSE	FALSE	FALSE	FALSE	FALSE	FALSE	FALSE	FALSE	FALSE	FALSE	FALSE	FALSE	FALSE	FALSE	FALSE	FALSE	FALSE	FALSE	FALSE	FALSE	FALSE	FALSE	FALSE	FALSE	FALSE	1	1	1	1	1	1	FALSE	FALSE	FALSE	FALSE	FALSE	FALSE
481	Ravin Ar.	7.3	7.8		FALSE	FALSE	FALSE	FALSE	FALSE	FALSE	FALSE	FALSE	FALSE	FALSE	FALSE	FALSE	FALSE	FALSE	FALSE	FALSE	FALSE	FALSE	FALSE	FALSE	FALSE	FALSE	FALSE	FALSE	FALSE	FALSE	FALSE	FALSE	FALSE	FALSE	FALSE	FALSE	FALSE	1	1	1	1	1	1	FALSE	FALSE	FALSE	FALSE	FALSE	FALSE
482	Irrawaddy 1	7.8	8.7		FALSE	FALSE	FALSE	FALSE	FALSE	FALSE	FALSE	FALSE	FALSE	FALSE	FALSE	FALSE	FALSE	FALSE	FALSE	FALSE	FALSE	FALSE	FALSE	FALSE	FALSE	FALSE	FALSE	FALSE	FALSE	FALSE	FALSE	FALSE	FALSE	FALSE	FALSE	FALSE	FALSE	FALSE	FALSE	FALSE	FALSE	FALSE	1	1	1	1	1	1	1
483	Guanghe-zhuangheji-LX200019	7.3	7.8		FALSE	FALSE	FALSE	FALSE	FALSE	FALSE	FALSE	FALSE	FALSE	FALSE	FALSE	FALSE	FALSE	FALSE	FALSE	FALSE	FALSE	FALSE	FALSE	FALSE	FALSE	FALSE	FALSE	FALSE	FALSE	FALSE	FALSE	FALSE	FALSE	FALSE	FALSE	FALSE	FALSE	1	1	1	1	1	1	FALSE	FALSE	FALSE	FALSE	FALSE	FALSE
484	Hezheng-hetuo-LX200023	7.3	7.8		FALSE	FALSE	FALSE	FALSE	FALSE	FALSE	FALSE	FALSE	FALSE	FALSE	FALSE	FALSE	FALSE	FALSE	FALSE	FALSE	FALSE	FALSE	FALSE	FALSE	FALSE	FALSE	FALSE	FALSE	FALSE	FALSE	FALSE	FALSE	FALSE	FALSE	FALSE	FALSE	FALSE	1	1	1	1	1	1	FALSE	FALSE	FALSE	FALSE	FALSE	FALSE
485	Hezheng-heilingding-LX200035	7.3	7.8		FALSE	FALSE	FALSE	FALSE	FALSE	FALSE	FALSE	FALSE	FALSE	FALSE	FALSE	FALSE	FALSE	FALSE	FALSE	FALSE	FALSE	FALSE	FALSE	FALSE	FALSE	FALSE	FALSE	FALSE	FALSE	FALSE	FALSE	FALSE	FALSE	FALSE	FALSE	FALSE	FALSE	1	1	1	1	1	1	FALSE	FALSE	FALSE	FALSE	FALSE	FALSE
486	Guonigou	9.7	11.1		FALSE	FALSE	FALSE	FALSE	FALSE	FALSE	FALSE	FALSE	FALSE	FALSE	FALSE	FALSE	FALSE	FALSE	FALSE	FALSE	FALSE	FALSE	FALSE	FALSE	FALSE	FALSE	FALSE	FALSE	FALSE	FALSE	FALSE	FALSE	FALSE	FALSE	FALSE	FALSE	FALSE	FALSE	FALSE	FALSE	FALSE	FALSE	FALSE	FALSE	FALSE	FALSE	FALSE	FALSE	FALSE
487	Hezheng-Dashengou	8.7	9.7		FALSE	FALSE	FALSE	FALSE	FALSE	FALSE	FALSE	FALSE	FALSE	FALSE	FALSE	FALSE	FALSE	FALSE	FALSE	FALSE	FALSE	FALSE	FALSE	FALSE	FALSE	FALSE	FALSE	FALSE	FALSE	FALSE	FALSE	FALSE	FALSE	FALSE	FALSE	FALSE	FALSE	FALSE	FALSE	FALSE	FALSE	FALSE	FALSE	FALSE	FALSE	FALSE	FALSE	FALSE	FALSE
488	Yangjiashan	7.8	8.7		FALSE	FALSE	FALSE	FALSE	FALSE	FALSE	FALSE	FALSE	FALSE	FALSE	FALSE	FALSE	FALSE	FALSE	FALSE	FALSE	FALSE	FALSE	FALSE	FALSE	FALSE	FALSE	FALSE	FALSE	FALSE	FALSE	FALSE	FALSE	FALSE	FALSE	FALSE	FALSE	FALSE	FALSE	FALSE	FALSE	FALSE	FALSE	1	1	1	1	1	1	1
489	Yushe	7.3	7.8		FALSE	FALSE	FALSE	FALSE	FALSE	FALSE	FALSE	FALSE	FALSE	FALSE	FALSE	FALSE	FALSE	FALSE	FALSE	FALSE	FALSE	FALSE	FALSE	FALSE	FALSE	FALSE	FALSE	FALSE	FALSE	FALSE	FALSE	FALSE	FALSE	FALSE	FALSE	FALSE	FALSE	1	1	1	1	1	1	FALSE	FALSE	FALSE	FALSE	FALSE	FALSE
490	Thermopigi	7.3	7.8		FALSE	FALSE	FALSE	FALSE	FALSE	FALSE	FALSE	FALSE	FALSE	FALSE	FALSE	FALSE	FALSE	FALSE	FALSE	FALSE	FALSE	FALSE	FALSE	FALSE	FALSE	FALSE	FALSE	FALSE	FALSE	FALSE	FALSE	FALSE	FALSE	FALSE	FALSE	FALSE	FALSE	1	1	1	1	1	1	FALSE	FALSE	FALSE	FALSE	FALSE	FALSE
491	Lushi-Redclay	7.3	7.8		FALSE	FALSE	FALSE	FALSE	FALSE	FALSE	FALSE	FALSE	FALSE	FALSE	FALSE	FALSE	FALSE	FALSE	FALSE	FALSE	FALSE	FALSE	FALSE	FALSE	FALSE	FALSE	FALSE	FALSE	FALSE	FALSE	FALSE	FALSE	FALSE	FALSE	FALSE	FALSE	FALSE	1	1	1	1	1	1	FALSE	FALSE	FALSE	FALSE	FALSE	FALSE
492	Jingning	7.3	7.8		FALSE	FALSE	FALSE	FALSE	FALSE	FALSE	FALSE	FALSE	FALSE	FALSE	FALSE	FALSE	FALSE	FALSE	FALSE	FALSE	FALSE	FALSE	FALSE	FALSE	FALSE	FALSE	FALSE	FALSE	FALSE	FALSE	FALSE	FALSE	FALSE	FALSE	FALSE	FALSE	FALSE	1	1	1	1	1	1	FALSE	FALSE	FALSE	FALSE	FALSE	FALSE
493	Huachi	7.3	7.8		FALSE	FALSE	FALSE	FALSE	FALSE	FALSE	FALSE	FALSE	FALSE	FALSE	FALSE	FALSE	FALSE	FALSE	FALSE	FALSE	FALSE	FALSE	FALSE	FALSE	FALSE	FALSE	FALSE	FALSE	FALSE	FALSE	FALSE	FALSE	FALSE	FALSE	FALSE	FALSE	FALSE	1	1	1	1	1	1	FALSE	FALSE	FALSE	FALSE	FALSE	FALSE
494	Xili	7.3	7.8		FALSE	FALSE	FALSE	FALSE	FALSE	FALSE	FALSE	FALSE	FALSE	FALSE	FALSE	FALSE	FALSE	FALSE	FALSE	FALSE	FALSE	FALSE	FALSE	FALSE	FALSE	FALSE	FALSE	FALSE	FALSE	FALSE	FALSE	FALSE	FALSE	FALSE	FALSE	FALSE	FALSE	1	1	1	1	1	1	FALSE	FALSE	FALSE	FALSE	FALSE	FALSE
495	Chongxin	7.3	7.8		FALSE	FALSE	FALSE	FALSE	FALSE	FALSE	FALSE	FALSE	FALSE	FALSE	FALSE	FALSE	FALSE	FALSE	FALSE	FALSE	FALSE	FALSE	FALSE	FALSE	FALSE	FALSE	FALSE	FALSE	FALSE	FALSE	FALSE	FALSE	FALSE	FALSE	FALSE	FALSE	FALSE	1	1	1	1	1	1	FALSE	FALSE	FALSE	FALSE	FALSE	FALSE
496	Wenquan-dakusitai	7.3	7.8		FALSE	FALSE	FALSE	FALSE	FALSE	FALSE	FALSE	FALSE	FALSE	FALSE	FALSE	FALSE	FALSE	FALSE	FALSE	FALSE	FALSE	FALSE	FALSE	FALSE	FALSE	FALSE	FALSE	FALSE	FALSE	FALSE	FALSE	FALSE	FALSE	FALSE	FALSE	FALSE	FALSE	1	1	1	1	1	1	FALSE	FALSE	FALSE	FALSE	FALSE	FALSE
497	Huoxian-anlecun	7.3	7.8		FALSE	FALSE	FALSE	FALSE	FALSE	FALSE	FALSE	FALSE	FALSE	FALSE	FALSE	FALSE	FALSE	FALSE	FALSE	FALSE	FALSE	FALSE	FALSE	FALSE	FALSE	FALSE	FALSE	FALSE	FALSE	FALSE	FALSE	FALSE	FALSE	FALSE	FALSE	FALSE	FALSE	1	1	1	1	1	1	FALSE	FALSE	FALSE	FALSE	FALSE	FALSE
498	Guide-heerjia	7.3	7.8		FALSE	FALSE	FALSE	FALSE	FALSE	FALSE	FALSE	FALSE	FALSE	FALSE	FALSE	FALSE	FALSE	FALSE	FALSE	FALSE	FALSE	FALSE	FALSE	FALSE	FALSE	FALSE	FALSE	FALSE	FALSE	FALSE	FALSE	FALSE	FALSE	FALSE	FALSE	FALSE	FALSE	1	1	1	1	1	1	FALSE	FALSE	FALSE	FALSE	FALSE	FALSE
499	Guanghe-sigou	8.7	9.7		FALSE	FALSE	FALSE	FALSE	FALSE	FALSE	FALSE	FALSE	FALSE	FALSE	FALSE	FALSE	FALSE	FALSE	FALSE	FALSE	FALSE	FALSE	FALSE	FALSE	FALSE	FALSE	FALSE	FALSE	FALSE	FALSE	FALSE	FALSE	FALSE	FALSE	FALSE	FALSE	FALSE	FALSE	FALSE	FALSE	FALSE	FALSE	FALSE	FALSE	FALSE	FALSE	FALSE	FALSE	FALSE
500	Qaidam-shenggou	7.8	8.7		FALSE	FALSE	FALSE	FALSE	FALSE	FALSE	FALSE	FALSE	FALSE	FALSE	FALSE	FALSE	FALSE	FALSE	FALSE	FALSE	FALSE	FALSE	FALSE	FALSE	FALSE	FALSE	FALSE	FALSE	FALSE	FALSE	FALSE	FALSE	FALSE	FALSE	FALSE	FALSE	FALSE	FALSE	FALSE	FALSE	FALSE	FALSE	1	1	1	1	1	1	1
501	Beticha	9.7	11.1		FALSE	FALSE	FALSE	FALSE	FALSE	FALSE	FALSE	FALSE	FALSE	FALSE	FALSE	FALSE	FALSE	FALSE	FALSE	FALSE	FALSE	FALSE	FALSE	FALSE	FALSE	FALSE	FALSE	FALSE	FALSE	FALSE	FALSE	FALSE	FALSE	FALSE	FALSE	FALSE	FALSE	FALSE	FALSE	FALSE	FALSE	FALSE	FALSE	FALSE	FALSE	FALSE	FALSE	FALSE	FALSE
502	Nurpur	4.9	7.3		FALSE	FALSE	FALSE	FALSE	FALSE	FALSE	FALSE	FALSE	FALSE	2	2	2	2	1	1	1	1	1	1	1	1	1	1	1	1	1	1	1	1	1	1	1	1	1	FALSE	FALSE	FALSE	FALSE	FALSE	FALSE	FALSE	FALSE	FALSE	FALSE	FALSE
503	Zinda pir 4	7.8	8.7		FALSE	FALSE	FALSE	FALSE	FALSE	FALSE	FALSE	FALSE	FALSE	FALSE	FALSE	FALSE	FALSE	FALSE	FALSE	FALSE	FALSE	FALSE	FALSE	FALSE	FALSE	FALSE	FALSE	FALSE	FALSE	FALSE	FALSE	FALSE	FALSE	FALSE	FALSE	FALSE	FALSE	FALSE	FALSE	FALSE	FALSE	FALSE	1	1	1	1	1	1	1
504	Sivas	7.3	7.8		FALSE	FALSE	FALSE	FALSE	FALSE	FALSE	FALSE	FALSE	FALSE	FALSE	FALSE	FALSE	FALSE	FALSE	FALSE	FALSE	FALSE	FALSE	FALSE	FALSE	FALSE	FALSE	FALSE	FALSE	FALSE	FALSE	FALSE	FALSE	FALSE	FALSE	FALSE	FALSE	FALSE	1	1	1	1	1	1	FALSE	FALSE	FALSE	FALSE	FALSE	FALSE
505	Melka el Ouidane	7.3	7.8		FALSE	FALSE	FALSE	FALSE	FALSE	FALSE	FALSE	FALSE	FALSE	FALSE	FALSE	FALSE	FALSE	FALSE	FALSE	FALSE	FALSE	FALSE	FALSE	FALSE	FALSE	FALSE	FALSE	FALSE	FALSE	FALSE	FALSE	FALSE	FALSE	FALSE	FALSE	FALSE	FALSE	1	1	1	1	1	1	FALSE	FALSE	FALSE	FALSE	FALSE	FALSE
506	Haritalyangar	8.7	9.7		FALSE	FALSE	FALSE	FALSE	FALSE	FALSE	FALSE	FALSE	FALSE	FALSE	FALSE	FALSE	FALSE	FALSE	FALSE	FALSE	FALSE	FALSE	FALSE	FALSE	FALSE	FALSE	FALSE	FALSE	FALSE	FALSE	FALSE	FALSE	FALSE	FALSE	FALSE	FALSE	FALSE	FALSE	FALSE	FALSE	FALSE	FALSE	FALSE	FALSE	FALSE	FALSE	FALSE	FALSE	FALSE
507	Malm	4.9	7.3		FALSE	FALSE	FALSE	FALSE	FALSE	FALSE	FALSE	FALSE	FALSE	2	2	2	2	1	1	1	1	1	1	1	1	1	1	1	1	1	1	1	1	1	1	1	1	1	FALSE	FALSE	FALSE	FALSE	FALSE	FALSE	FALSE	FALSE	FALSE	FALSE	FALSE
508	Tinau khola	8.7	9.7		FALSE	FALSE	FALSE	FALSE	FALSE	FALSE	FALSE	FALSE	FALSE	FALSE	FALSE	FALSE	FALSE	FALSE	FALSE	FALSE	FALSE	FALSE	FALSE	FALSE	FALSE	FALSE	FALSE	FALSE	FALSE	FALSE	FALSE	FALSE	FALSE	FALSE	FALSE	FALSE	FALSE	FALSE	FALSE	FALSE	FALSE	FALSE	FALSE	FALSE	FALSE	FALSE	FALSE	FALSE	FALSE
509	C-136A	10	11.6		FALSE	FALSE	FALSE	FALSE	FALSE	FALSE	FALSE	FALSE	FALSE	FALSE	FALSE	FALSE	FALSE	FALSE	FALSE	FALSE	FALSE	FALSE	FALSE	FALSE	FALSE	FALSE	FALSE	FALSE	FALSE	FALSE	FALSE	FALSE	FALSE	FALSE	FALSE	FALSE	FALSE	FALSE	FALSE	FALSE	FALSE	FALSE	FALSE	FALSE	FALSE	FALSE	FALSE	FALSE	FALSE
510	Cerro Jancocata	10.6	10.7		FALSE	FALSE	FALSE	FALSE	FALSE	FALSE	FALSE	FALSE	FALSE	FALSE	FALSE	FALSE	FALSE	FALSE	FALSE	FALSE	FALSE	FALSE	FALSE	FALSE	FALSE	FALSE	FALSE	FALSE	FALSE	FALSE	FALSE	FALSE	FALSE	FALSE	FALSE	FALSE	FALSE	FALSE	FALSE	FALSE	FALSE	FALSE	FALSE	FALSE	FALSE	FALSE	FALSE	FALSE	FALSE
511	Chuitna River	8	11.3		FALSE	FALSE	FALSE	FALSE	FALSE	FALSE	FALSE	FALSE	FALSE	FALSE	FALSE	FALSE	FALSE	FALSE	FALSE	FALSE	FALSE	FALSE	FALSE	FALSE	FALSE	FALSE	FALSE	FALSE	FALSE	FALSE	FALSE	FALSE	FALSE	FALSE	FALSE	FALSE	FALSE	FALSE	FALSE	FALSE	FALSE	FALSE	FALSE	FALSE	1	1	1	1	1
512	Drenovets C-1	7.3	10		FALSE	FALSE	FALSE	FALSE	FALSE	FALSE	FALSE	FALSE	FALSE	FALSE	FALSE	FALSE	FALSE	FALSE	FALSE	FALSE	FALSE	FALSE	FALSE	FALSE	FALSE	FALSE	FALSE	FALSE	FALSE	FALSE	FALSE	FALSE	FALSE	FALSE	FALSE	FALSE	FALSE	1	1	1	1	1	1	1	1	1	1	1	1
513	Elazig	9	10		FALSE	FALSE	FALSE	FALSE	FALSE	FALSE	FALSE	FALSE	FALSE	FALSE	FALSE	FALSE	FALSE	FALSE	FALSE	FALSE	FALSE	FALSE	FALSE	FALSE	FALSE	FALSE	FALSE	FALSE	FALSE	FALSE	FALSE	FALSE	FALSE	FALSE	FALSE	FALSE	FALSE	FALSE	FALSE	FALSE	FALSE	FALSE	FALSE	FALSE	FALSE	FALSE	FALSE	FALSE	FALSE
514	Hog Creek 635	6	11.8		FALSE	FALSE	FALSE	FALSE	FALSE	FALSE	FALSE	FALSE	FALSE	FALSE	FALSE	FALSE	FALSE	FALSE	FALSE	FALSE	FALSE	FALSE	FALSE	FALSE	1	1	1	1	1	1	1	1	1	1	1	1	1	1	1	1	1	1	1	1	1	1	1	1	1
516	Homer	5	10		FALSE	FALSE	FALSE	FALSE	FALSE	FALSE	FALSE	FALSE	FALSE	FALSE	2	2	2	1	1	1	1	1	1	1	1	1	1	1	1	1	1	1	1	1	1	1	1	1	1	1	1	1	1	1	1	1	1	1	1
517	Kapturo	6.7	7.2		FALSE	FALSE	FALSE	FALSE	FALSE	FALSE	FALSE	FALSE	FALSE	FALSE	FALSE	FALSE	FALSE	FALSE	FALSE	FALSE	FALSE	FALSE	FALSE	FALSE	FALSE	FALSE	FALSE	FALSE	FALSE	FALSE	FALSE	1	1	1	1	1	1	FALSE	FALSE	FALSE	FALSE	FALSE	FALSE	FALSE	FALSE	FALSE	FALSE	FALSE	FALSE
518	Kimble Homestead	7.3	7.5		FALSE	FALSE	FALSE	FALSE	FALSE	FALSE	FALSE	FALSE	FALSE	FALSE	FALSE	FALSE	FALSE	FALSE	FALSE	FALSE	FALSE	FALSE	FALSE	FALSE	FALSE	FALSE	FALSE	FALSE	FALSE	FALSE	FALSE	FALSE	FALSE	FALSE	FALSE	FALSE	FALSE	1	1	1	FALSE	FALSE	FALSE	FALSE	FALSE	FALSE	FALSE	FALSE	FALSE
519	Kimble Homestead	7.2	7.3		FALSE	FALSE	FALSE	FALSE	FALSE	FALSE	FALSE	FALSE	FALSE	FALSE	FALSE	FALSE	FALSE	FALSE	FALSE	FALSE	FALSE	FALSE	FALSE	FALSE	FALSE	FALSE	FALSE	FALSE	FALSE	FALSE	FALSE	FALSE	FALSE	FALSE	FALSE	FALSE	1	1	FALSE	FALSE	FALSE	FALSE	FALSE	FALSE	FALSE	FALSE	FALSE	FALSE	FALSE
520	Legler Lignite	11	11		FALSE	FALSE	FALSE	FALSE	FALSE	FALSE	FALSE	FALSE	FALSE	FALSE	FALSE	FALSE	FALSE	FALSE	FALSE	FALSE	FALSE	FALSE	FALSE	FALSE	FALSE	FALSE	FALSE	FALSE	FALSE	FALSE	FALSE	FALSE	FALSE	FALSE	FALSE	FALSE	FALSE	FALSE	FALSE	FALSE	FALSE	FALSE	FALSE	FALSE	FALSE	FALSE	FALSE	FALSE	FALSE
521	Luhe Coal Mine	5.3	11.3		FALSE	FALSE	FALSE	FALSE	FALSE	FALSE	FALSE	FALSE	FALSE	FALSE	FALSE	FALSE	FALSE	1	1	1	1	1	1	1	1	1	1	1	1	1	1	1	1	1	1	1	1	1	1	1	1	1	1	1	1	1	1	1	1
522	Mt. Reba	7	7		FALSE	FALSE	FALSE	FALSE	FALSE	FALSE	FALSE	FALSE	FALSE	FALSE	FALSE	FALSE	FALSE	FALSE	FALSE	FALSE	FALSE	FALSE	FALSE	FALSE	FALSE	FALSE	FALSE	FALSE	FALSE	FALSE	FALSE	FALSE	FALSE	FALSE	1	FALSE	FALSE	FALSE	FALSE	FALSE	FALSE	FALSE	FALSE	FALSE	FALSE	FALSE	FALSE	FALSE	FALSE
523	Pickett Creek	8.5	10.5		FALSE	FALSE	FALSE	FALSE	FALSE	FALSE	FALSE	FALSE	FALSE	FALSE	FALSE	FALSE	FALSE	FALSE	FALSE	FALSE	FALSE	FALSE	FALSE	FALSE	FALSE	FALSE	FALSE	FALSE	FALSE	FALSE	FALSE	FALSE	FALSE	FALSE	FALSE	FALSE	FALSE	FALSE	FALSE	FALSE	FALSE	FALSE	FALSE	FALSE	FALSE	FALSE	FALSE	FALSE	FALSE
524	Pislepampa	6	7		FALSE	FALSE	FALSE	FALSE	FALSE	FALSE	FALSE	FALSE	FALSE	FALSE	FALSE	FALSE	FALSE	FALSE	FALSE	FALSE	FALSE	FALSE	FALSE	FALSE	1	1	1	1	1	1	1	1	1	1	1	FALSE	FALSE	FALSE	FALSE	FALSE	FALSE	FALSE	FALSE	FALSE	FALSE	FALSE	FALSE	FALSE	FALSE
525	Sivas-Hafik	8	9		FALSE	FALSE	FALSE	FALSE	FALSE	FALSE	FALSE	FALSE	FALSE	FALSE	FALSE	FALSE	FALSE	FALSE	FALSE	FALSE	FALSE	FALSE	FALSE	FALSE	FALSE	FALSE	FALSE	FALSE	FALSE	FALSE	FALSE	FALSE	FALSE	FALSE	FALSE	FALSE	FALSE	FALSE	FALSE	FALSE	FALSE	FALSE	FALSE	FALSE	1	1	1	1	1
526	Tagus Basin	9.7	11.1		FALSE	FALSE	FALSE	FALSE	FALSE	FALSE	FALSE	FALSE	FALSE	FALSE	FALSE	FALSE	FALSE	FALSE	FALSE	FALSE	FALSE	FALSE	FALSE	FALSE	FALSE	FALSE	FALSE	FALSE	FALSE	FALSE	FALSE	FALSE	FALSE	FALSE	FALSE	FALSE	FALSE	FALSE	FALSE	FALSE	FALSE	FALSE	FALSE	FALSE	FALSE	FALSE	FALSE	FALSE	FALSE
527	Tanaro River	5.7	6		FALSE	FALSE	FALSE	FALSE	FALSE	FALSE	FALSE	FALSE	FALSE	FALSE	FALSE	FALSE	FALSE	FALSE	FALSE	FALSE	FALSE	1	1	1	1	FALSE	FALSE	FALSE	FALSE	FALSE	FALSE	FALSE	FALSE	FALSE	FALSE	FALSE	FALSE	FALSE	FALSE	FALSE	FALSE	FALSE	FALSE	FALSE	FALSE	FALSE	FALSE	FALSE	FALSE
528	Tatlanika Creek	5.4	9		FALSE	FALSE	FALSE	FALSE	FALSE	FALSE	FALSE	FALSE	FALSE	FALSE	FALSE	FALSE	FALSE	FALSE	1	1	1	1	1	1	1	1	1	1	1	1	1	1	1	1	1	1	1	1	1	1	1	1	1	1	1	1	1	1	1
529	Trapper Creek	9	11.8		FALSE	FALSE	FALSE	FALSE	FALSE	FALSE	FALSE	FALSE	FALSE	FALSE	FALSE	FALSE	FALSE	FALSE	FALSE	FALSE	FALSE	FALSE	FALSE	FALSE	FALSE	FALSE	FALSE	FALSE	FALSE	FALSE	FALSE	FALSE	FALSE	FALSE	FALSE	FALSE	FALSE	FALSE	FALSE	FALSE	FALSE	FALSE	FALSE	FALSE	FALSE	FALSE	FALSE	FALSE	FALSE
530	Upper Jakokkota	10.6	10.7		FALSE	FALSE	FALSE	FALSE	FALSE	FALSE	FALSE	FALSE	FALSE	FALSE	FALSE	FALSE	FALSE	FALSE	FALSE	FALSE	FALSE	FALSE	FALSE	FALSE	FALSE	FALSE	FALSE	FALSE	FALSE	FALSE	FALSE	FALSE	FALSE	FALSE	FALSE	FALSE	FALSE	FALSE	FALSE	FALSE	FALSE	FALSE	FALSE	FALSE	FALSE	FALSE	FALSE	FALSE	FALSE
531	Vegora	4.9	7.3		FALSE	FALSE	FALSE	FALSE	FALSE	FALSE	FALSE	FALSE	FALSE	2	2	2	2	1	1	1	1	1	1	1	1	1	1	1	1	1	1	1	1	1	1	1	1	1	FALSE	FALSE	FALSE	FALSE	FALSE	FALSE	FALSE	FALSE	FALSE	FALSE	FALSE
532	Velikaya Began 856 well	5.4	7.1		FALSE	FALSE	FALSE	FALSE	FALSE	FALSE	FALSE	FALSE	FALSE	FALSE	FALSE	FALSE	FALSE	FALSE	1	1	1	1	1	1	1	1	1	1	1	1	1	1	1	1	1	1	FALSE	FALSE	FALSE	FALSE	FALSE	FALSE	FALSE	FALSE	FALSE	FALSE	FALSE	FALSE	FALSE
533	Velikaya Began 856 well	7.1	11.5		FALSE	FALSE	FALSE	FALSE	FALSE	FALSE	FALSE	FALSE	FALSE	FALSE	FALSE	FALSE	FALSE	FALSE	FALSE	FALSE	FALSE	FALSE	FALSE	FALSE	FALSE	FALSE	FALSE	FALSE	FALSE	FALSE	FALSE	FALSE	FALSE	FALSE	FALSE	1	1	1	1	1	1	1	1	1	1	1	1	1	1
534	Xiolongtan coalmine	9	11.6		FALSE	FALSE	FALSE	FALSE	FALSE	FALSE	FALSE	FALSE	FALSE	FALSE	FALSE	FALSE	FALSE	FALSE	FALSE	FALSE	FALSE	FALSE	FALSE	FALSE	FALSE	FALSE	FALSE	FALSE	FALSE	FALSE	FALSE	FALSE	FALSE	FALSE	FALSE	FALSE	FALSE	FALSE	FALSE	FALSE	FALSE	FALSE	FALSE	FALSE	FALSE	FALSE	FALSE	FALSE	FALSE
535	Polgardi 2	5.4	6.2		FALSE	FALSE	FALSE	FALSE	FALSE	FALSE	FALSE	FALSE	FALSE	FALSE	FALSE	FALSE	FALSE	FALSE	1	1	1	1	1	1	1	1	1	FALSE	FALSE	FALSE	FALSE	FALSE	FALSE	FALSE	FALSE	FALSE	FALSE	FALSE	FALSE	FALSE	FALSE	FALSE	FALSE	FALSE	FALSE	FALSE	FALSE	FALSE	FALSE
536	Polgardi 4	6.1	6.8		FALSE	FALSE	FALSE	FALSE	FALSE	FALSE	FALSE	FALSE	FALSE	FALSE	FALSE	FALSE	FALSE	FALSE	FALSE	FALSE	FALSE	FALSE	FALSE	FALSE	FALSE	1	1	1	1	1	1	1	1	FALSE	FALSE	FALSE	FALSE	FALSE	FALSE	FALSE	FALSE	FALSE	FALSE	FALSE	FALSE	FALSE	FALSE	FALSE	FALSE
537	Tardosbánya 3	6.8	7.7		FALSE	FALSE	FALSE	FALSE	FALSE	FALSE	FALSE	FALSE	FALSE	FALSE	FALSE	FALSE	FALSE	FALSE	FALSE	FALSE	FALSE	FALSE	FALSE	FALSE	FALSE	FALSE	FALSE	FALSE	FALSE	FALSE	FALSE	FALSE	1	1	1	1	1	1	1	1	1	1	FALSE	FALSE	FALSE	FALSE	FALSE	FALSE	FALSE
538	Csákvár	7.6	8.8		FALSE	FALSE	FALSE	FALSE	FALSE	FALSE	FALSE	FALSE	FALSE	FALSE	FALSE	FALSE	FALSE	FALSE	FALSE	FALSE	FALSE	FALSE	FALSE	FALSE	FALSE	FALSE	FALSE	FALSE	FALSE	FALSE	FALSE	FALSE	FALSE	FALSE	FALSE	FALSE	FALSE	FALSE	FALSE	FALSE	1	1	1	1	1	1	1	1	1
539	Dorn–Dürkheim	7.8	8.8		FALSE	FALSE	FALSE	FALSE	FALSE	FALSE	FALSE	FALSE	FALSE	FALSE	FALSE	FALSE	FALSE	FALSE	FALSE	FALSE	FALSE	FALSE	FALSE	FALSE	FALSE	FALSE	FALSE	FALSE	FALSE	FALSE	FALSE	FALSE	FALSE	FALSE	FALSE	FALSE	FALSE	FALSE	FALSE	FALSE	FALSE	FALSE	1	1	1	1	1	1	1
540	Prottes	7.8	8.8		FALSE	FALSE	FALSE	FALSE	FALSE	FALSE	FALSE	FALSE	FALSE	FALSE	FALSE	FALSE	FALSE	FALSE	FALSE	FALSE	FALSE	FALSE	FALSE	FALSE	FALSE	FALSE	FALSE	FALSE	FALSE	FALSE	FALSE	FALSE	FALSE	FALSE	FALSE	FALSE	FALSE	FALSE	FALSE	FALSE	FALSE	FALSE	1	1	1	1	1	1	1
541	Kohfidisch	8.6	9		FALSE	FALSE	FALSE	FALSE	FALSE	FALSE	FALSE	FALSE	FALSE	FALSE	FALSE	FALSE	FALSE	FALSE	FALSE	FALSE	FALSE	FALSE	FALSE	FALSE	FALSE	FALSE	FALSE	FALSE	FALSE	FALSE	FALSE	FALSE	FALSE	FALSE	FALSE	FALSE	FALSE	FALSE	FALSE	FALSE	FALSE	FALSE	FALSE	FALSE	FALSE	FALSE	FALSE	FALSE	FALSE
542	Suchomasty	8.8	9.2		FALSE	FALSE	FALSE	FALSE	FALSE	FALSE	FALSE	FALSE	FALSE	FALSE	FALSE	FALSE	FALSE	FALSE	FALSE	FALSE	FALSE	FALSE	FALSE	FALSE	FALSE	FALSE	FALSE	FALSE	FALSE	FALSE	FALSE	FALSE	FALSE	FALSE	FALSE	FALSE	FALSE	FALSE	FALSE	FALSE	FALSE	FALSE	FALSE	FALSE	FALSE	FALSE	FALSE	FALSE	FALSE
543	Varnitza	9.4	9.9		FALSE	FALSE	FALSE	FALSE	FALSE	FALSE	FALSE	FALSE	FALSE	FALSE	FALSE	FALSE	FALSE	FALSE	FALSE	FALSE	FALSE	FALSE	FALSE	FALSE	FALSE	FALSE	FALSE	FALSE	FALSE	FALSE	FALSE	FALSE	FALSE	FALSE	FALSE	FALSE	FALSE	FALSE	FALSE	FALSE	FALSE	FALSE	FALSE	FALSE	FALSE	FALSE	FALSE	FALSE	FALSE
544	Kalfa	9.5	9.9		FALSE	FALSE	FALSE	FALSE	FALSE	FALSE	FALSE	FALSE	FALSE	FALSE	FALSE	FALSE	FALSE	FALSE	FALSE	FALSE	FALSE	FALSE	FALSE	FALSE	FALSE	FALSE	FALSE	FALSE	FALSE	FALSE	FALSE	FALSE	FALSE	FALSE	FALSE	FALSE	FALSE	FALSE	FALSE	FALSE	FALSE	FALSE	FALSE	FALSE	FALSE	FALSE	FALSE	FALSE	FALSE
545	Buzhor 1	9.5	9.9		FALSE	FALSE	FALSE	FALSE	FALSE	FALSE	FALSE	FALSE	FALSE	FALSE	FALSE	FALSE	FALSE	FALSE	FALSE	FALSE	FALSE	FALSE	FALSE	FALSE	FALSE	FALSE	FALSE	FALSE	FALSE	FALSE	FALSE	FALSE	FALSE	FALSE	FALSE	FALSE	FALSE	FALSE	FALSE	FALSE	FALSE	FALSE	FALSE	FALSE	FALSE	FALSE	FALSE	FALSE	FALSE
546	Lapushna	9.6	10		FALSE	FALSE	FALSE	FALSE	FALSE	FALSE	FALSE	FALSE	FALSE	FALSE	FALSE	FALSE	FALSE	FALSE	FALSE	FALSE	FALSE	FALSE	FALSE	FALSE	FALSE	FALSE	FALSE	FALSE	FALSE	FALSE	FALSE	FALSE	FALSE	FALSE	FALSE	FALSE	FALSE	FALSE	FALSE	FALSE	FALSE	FALSE	FALSE	FALSE	FALSE	FALSE	FALSE	FALSE	FALSE
547	Maikop	9.6	10		FALSE	FALSE	FALSE	FALSE	FALSE	FALSE	FALSE	FALSE	FALSE	FALSE	FALSE	FALSE	FALSE	FALSE	FALSE	FALSE	FALSE	FALSE	FALSE	FALSE	FALSE	FALSE	FALSE	FALSE	FALSE	FALSE	FALSE	FALSE	FALSE	FALSE	FALSE	FALSE	FALSE	FALSE	FALSE	FALSE	FALSE	FALSE	FALSE	FALSE	FALSE	FALSE	FALSE	FALSE	FALSE
548	Götzendorf	9.8	9.9		FALSE	FALSE	FALSE	FALSE	FALSE	FALSE	FALSE	FALSE	FALSE	FALSE	FALSE	FALSE	FALSE	FALSE	FALSE	FALSE	FALSE	FALSE	FALSE	FALSE	FALSE	FALSE	FALSE	FALSE	FALSE	FALSE	FALSE	FALSE	FALSE	FALSE	FALSE	FALSE	FALSE	FALSE	FALSE	FALSE	FALSE	FALSE	FALSE	FALSE	FALSE	FALSE	FALSE	FALSE	FALSE
549	Rudabanja	9.9	10.3		FALSE	FALSE	FALSE	FALSE	FALSE	FALSE	FALSE	FALSE	FALSE	FALSE	FALSE	FALSE	FALSE	FALSE	FALSE	FALSE	FALSE	FALSE	FALSE	FALSE	FALSE	FALSE	FALSE	FALSE	FALSE	FALSE	FALSE	FALSE	FALSE	FALSE	FALSE	FALSE	FALSE	FALSE	FALSE	FALSE	FALSE	FALSE	FALSE	FALSE	FALSE	FALSE	FALSE	FALSE	FALSE
550	Richardhof-Golfplatz	10.1	10.3		FALSE	FALSE	FALSE	FALSE	FALSE	FALSE	FALSE	FALSE	FALSE	FALSE	FALSE	FALSE	FALSE	FALSE	FALSE	FALSE	FALSE	FALSE	FALSE	FALSE	FALSE	FALSE	FALSE	FALSE	FALSE	FALSE	FALSE	FALSE	FALSE	FALSE	FALSE	FALSE	FALSE	FALSE	FALSE	FALSE	FALSE	FALSE	FALSE	FALSE	FALSE	FALSE	FALSE	FALSE	FALSE
551	Tartaros	10	10.5		FALSE	FALSE	FALSE	FALSE	FALSE	FALSE	FALSE	FALSE	FALSE	FALSE	FALSE	FALSE	FALSE	FALSE	FALSE	FALSE	FALSE	FALSE	FALSE	FALSE	FALSE	FALSE	FALSE	FALSE	FALSE	FALSE	FALSE	FALSE	FALSE	FALSE	FALSE	FALSE	FALSE	FALSE	FALSE	FALSE	FALSE	FALSE	FALSE	FALSE	FALSE	FALSE	FALSE	FALSE	FALSE
552	Vösendorf	10.3	10.5		FALSE	FALSE	FALSE	FALSE	FALSE	FALSE	FALSE	FALSE	FALSE	FALSE	FALSE	FALSE	FALSE	FALSE	FALSE	FALSE	FALSE	FALSE	FALSE	FALSE	FALSE	FALSE	FALSE	FALSE	FALSE	FALSE	FALSE	FALSE	FALSE	FALSE	FALSE	FALSE	FALSE	FALSE	FALSE	FALSE	FALSE	FALSE	FALSE	FALSE	FALSE	FALSE	FALSE	FALSE	FALSE
553	Hammerschmeide 3	11	11.2		FALSE	FALSE	FALSE	FALSE	FALSE	FALSE	FALSE	FALSE	FALSE	FALSE	FALSE	FALSE	FALSE	FALSE	FALSE	FALSE	FALSE	FALSE	FALSE	FALSE	FALSE	FALSE	FALSE	FALSE	FALSE	FALSE	FALSE	FALSE	FALSE	FALSE	FALSE	FALSE	FALSE	FALSE	FALSE	FALSE	FALSE	FALSE	FALSE	FALSE	FALSE	FALSE	FALSE	FALSE	FALSE
554	Hammerschmeide 2	11	11.2		FALSE	FALSE	FALSE	FALSE	FALSE	FALSE	FALSE	FALSE	FALSE	FALSE	FALSE	FALSE	FALSE	FALSE	FALSE	FALSE	FALSE	FALSE	FALSE	FALSE	FALSE	FALSE	FALSE	FALSE	FALSE	FALSE	FALSE	FALSE	FALSE	FALSE	FALSE	FALSE	FALSE	FALSE	FALSE	FALSE	FALSE	FALSE	FALSE	FALSE	FALSE	FALSE	FALSE	FALSE	FALSE
555	Hammerschmeide 1	11.1	11.3		FALSE	FALSE	FALSE	FALSE	FALSE	FALSE	FALSE	FALSE	FALSE	FALSE	FALSE	FALSE	FALSE	FALSE	FALSE	FALSE	FALSE	FALSE	FALSE	FALSE	FALSE	FALSE	FALSE	FALSE	FALSE	FALSE	FALSE	FALSE	FALSE	FALSE	FALSE	FALSE	FALSE	FALSE	FALSE	FALSE	FALSE	FALSE	FALSE	FALSE	FALSE	FALSE	FALSE	FALSE	FALSE
556	Gritsev	10.9	11.5		FALSE	FALSE	FALSE	FALSE	FALSE	FALSE	FALSE	FALSE	FALSE	FALSE	FALSE	FALSE	FALSE	FALSE	FALSE	FALSE	FALSE	FALSE	FALSE	FALSE	FALSE	FALSE	FALSE	FALSE	FALSE	FALSE	FALSE	FALSE	FALSE	FALSE	FALSE	FALSE	FALSE	FALSE	FALSE	FALSE	FALSE	FALSE	FALSE	FALSE	FALSE	FALSE	FALSE	FALSE	FALSE
557	Petersbuch 14	10.8	11.8		FALSE	FALSE	FALSE	FALSE	FALSE	FALSE	FALSE	FALSE	FALSE	FALSE	FALSE	FALSE	FALSE	FALSE	FALSE	FALSE	FALSE	FALSE	FALSE	FALSE	FALSE	FALSE	FALSE	FALSE	FALSE	FALSE	FALSE	FALSE	FALSE	FALSE	FALSE	FALSE	FALSE	FALSE	FALSE	FALSE	FALSE	FALSE	FALSE	FALSE	FALSE	FALSE	FALSE	FALSE	FALSE
558	Petersbuch 48	11	12		FALSE	FALSE	FALSE	FALSE	FALSE	FALSE	FALSE	FALSE	FALSE	FALSE	FALSE	FALSE	FALSE	FALSE	FALSE	FALSE	FALSE	FALSE	FALSE	FALSE	FALSE	FALSE	FALSE	FALSE	FALSE	FALSE	FALSE	FALSE	FALSE	FALSE	FALSE	FALSE	FALSE	FALSE	FALSE	FALSE	FALSE	FALSE	FALSE	FALSE	FALSE	FALSE	FALSE	FALSE	FALSE
559	Felsötarkany 1 + 3/2	11.1	12.1		FALSE	FALSE	FALSE	FALSE	FALSE	FALSE	FALSE	FALSE	FALSE	FALSE	FALSE	FALSE	FALSE	FALSE	FALSE	FALSE	FALSE	FALSE	FALSE	FALSE	FALSE	FALSE	FALSE	FALSE	FALSE	FALSE	FALSE	FALSE	FALSE	FALSE	FALSE	FALSE	FALSE	FALSE	FALSE	FALSE	FALSE	FALSE	FALSE	FALSE	FALSE	FALSE	FALSE	FALSE	FALSE
561	Peralejos E	5.4	5.4		FALSE	FALSE	FALSE	FALSE	FALSE	FALSE	FALSE	FALSE	FALSE	FALSE	FALSE	FALSE	FALSE	FALSE	1	FALSE	FALSE	FALSE	FALSE	FALSE	FALSE	FALSE	FALSE	FALSE	FALSE	FALSE	FALSE	FALSE	FALSE	FALSE	FALSE	FALSE	FALSE	FALSE	FALSE	FALSE	FALSE	FALSE	FALSE	FALSE	FALSE	FALSE	FALSE	FALSE	FALSE
562	Lomas de Casares 2	5.5	5.5		FALSE	FALSE	FALSE	FALSE	FALSE	FALSE	FALSE	FALSE	FALSE	FALSE	FALSE	FALSE	FALSE	FALSE	FALSE	1	FALSE	FALSE	FALSE	FALSE	FALSE	FALSE	FALSE	FALSE	FALSE	FALSE	FALSE	FALSE	FALSE	FALSE	FALSE	FALSE	FALSE	FALSE	FALSE	FALSE	FALSE	FALSE	FALSE	FALSE	FALSE	FALSE	FALSE	FALSE	FALSE
563	Lomas de Casares 3	5.8	5.8		FALSE	FALSE	FALSE	FALSE	FALSE	FALSE	FALSE	FALSE	FALSE	FALSE	FALSE	FALSE	FALSE	FALSE	FALSE	FALSE	FALSE	FALSE	1	FALSE	FALSE	FALSE	FALSE	FALSE	FALSE	FALSE	FALSE	FALSE	FALSE	FALSE	FALSE	FALSE	FALSE	FALSE	FALSE	FALSE	FALSE	FALSE	FALSE	FALSE	FALSE	FALSE	FALSE	FALSE	FALSE
564	Lomas de Casares 4	5.8	5.8		FALSE	FALSE	FALSE	FALSE	FALSE	FALSE	FALSE	FALSE	FALSE	FALSE	FALSE	FALSE	FALSE	FALSE	FALSE	FALSE	FALSE	FALSE	1	FALSE	FALSE	FALSE	FALSE	FALSE	FALSE	FALSE	FALSE	FALSE	FALSE	FALSE	FALSE	FALSE	FALSE	FALSE	FALSE	FALSE	FALSE	FALSE	FALSE	FALSE	FALSE	FALSE	FALSE	FALSE	FALSE
565	Arquillo 1	6.2	6.2		FALSE	FALSE	FALSE	FALSE	FALSE	FALSE	FALSE	FALSE	FALSE	FALSE	FALSE	FALSE	FALSE	FALSE	FALSE	FALSE	FALSE	FALSE	FALSE	FALSE	FALSE	FALSE	1	FALSE	FALSE	FALSE	FALSE	FALSE	FALSE	FALSE	FALSE	FALSE	FALSE	FALSE	FALSE	FALSE	FALSE	FALSE	FALSE	FALSE	FALSE	FALSE	FALSE	FALSE	FALSE
566	Villastar	6.3	6.3		FALSE	FALSE	FALSE	FALSE	FALSE	FALSE	FALSE	FALSE	FALSE	FALSE	FALSE	FALSE	FALSE	FALSE	FALSE	FALSE	FALSE	FALSE	FALSE	FALSE	FALSE	FALSE	FALSE	1	FALSE	FALSE	FALSE	FALSE	FALSE	FALSE	FALSE	FALSE	FALSE	FALSE	FALSE	FALSE	FALSE	FALSE	FALSE	FALSE	FALSE	FALSE	FALSE	FALSE	FALSE
567	Bunker de Valdecebro 4/5	6.5	6.5		FALSE	FALSE	FALSE	FALSE	FALSE	FALSE	FALSE	FALSE	FALSE	FALSE	FALSE	FALSE	FALSE	FALSE	FALSE	FALSE	FALSE	FALSE	FALSE	FALSE	FALSE	FALSE	FALSE	FALSE	FALSE	1	FALSE	FALSE	FALSE	FALSE	FALSE	FALSE	FALSE	FALSE	FALSE	FALSE	FALSE	FALSE	FALSE	FALSE	FALSE	FALSE	FALSE	FALSE	FALSE
568	Valdecebro 3	6.6	6.6		FALSE	FALSE	FALSE	FALSE	FALSE	FALSE	FALSE	FALSE	FALSE	FALSE	FALSE	FALSE	FALSE	FALSE	FALSE	FALSE	FALSE	FALSE	FALSE	FALSE	FALSE	FALSE	FALSE	FALSE	FALSE	FALSE	1	FALSE	FALSE	FALSE	FALSE	FALSE	FALSE	FALSE	FALSE	FALSE	FALSE	FALSE	FALSE	FALSE	FALSE	FALSE	FALSE	FALSE	FALSE
569	Masada del Valle 7	6.9	6.9		FALSE	FALSE	FALSE	FALSE	FALSE	FALSE	FALSE	FALSE	FALSE	FALSE	FALSE	FALSE	FALSE	FALSE	FALSE	FALSE	FALSE	FALSE	FALSE	FALSE	FALSE	FALSE	FALSE	FALSE	FALSE	FALSE	FALSE	FALSE	FALSE	1	FALSE	FALSE	FALSE	FALSE	FALSE	FALSE	FALSE	FALSE	FALSE	FALSE	FALSE	FALSE	FALSE	FALSE	FALSE
570	Bunker de Valdecebro 3	6.9	6.9		FALSE	FALSE	FALSE	FALSE	FALSE	FALSE	FALSE	FALSE	FALSE	FALSE	FALSE	FALSE	FALSE	FALSE	FALSE	FALSE	FALSE	FALSE	FALSE	FALSE	FALSE	FALSE	FALSE	FALSE	FALSE	FALSE	FALSE	FALSE	FALSE	1	FALSE	FALSE	FALSE	FALSE	FALSE	FALSE	FALSE	FALSE	FALSE	FALSE	FALSE	FALSE	FALSE	FALSE	FALSE
571	La Gloria 6	7.1	7.1		FALSE	FALSE	FALSE	FALSE	FALSE	FALSE	FALSE	FALSE	FALSE	FALSE	FALSE	FALSE	FALSE	FALSE	FALSE	FALSE	FALSE	FALSE	FALSE	FALSE	FALSE	FALSE	FALSE	FALSE	FALSE	FALSE	FALSE	FALSE	FALSE	FALSE	FALSE	1	FALSE	FALSE	FALSE	FALSE	FALSE	FALSE	FALSE	FALSE	FALSE	FALSE	FALSE	FALSE	FALSE
572	Valdecebro 5	7.1	7.1		FALSE	FALSE	FALSE	FALSE	FALSE	FALSE	FALSE	FALSE	FALSE	FALSE	FALSE	FALSE	FALSE	FALSE	FALSE	FALSE	FALSE	FALSE	FALSE	FALSE	FALSE	FALSE	FALSE	FALSE	FALSE	FALSE	FALSE	FALSE	FALSE	FALSE	FALSE	1	FALSE	FALSE	FALSE	FALSE	FALSE	FALSE	FALSE	FALSE	FALSE	FALSE	FALSE	FALSE	FALSE
573	Concud	7.1	7.1		FALSE	FALSE	FALSE	FALSE	FALSE	FALSE	FALSE	FALSE	FALSE	FALSE	FALSE	FALSE	FALSE	FALSE	FALSE	FALSE	FALSE	FALSE	FALSE	FALSE	FALSE	FALSE	FALSE	FALSE	FALSE	FALSE	FALSE	FALSE	FALSE	FALSE	FALSE	1	FALSE	FALSE	FALSE	FALSE	FALSE	FALSE	FALSE	FALSE	FALSE	FALSE	FALSE	FALSE	FALSE
574	Concud 3	7.1	7.1		FALSE	FALSE	FALSE	FALSE	FALSE	FALSE	FALSE	FALSE	FALSE	FALSE	FALSE	FALSE	FALSE	FALSE	FALSE	FALSE	FALSE	FALSE	FALSE	FALSE	FALSE	FALSE	FALSE	FALSE	FALSE	FALSE	FALSE	FALSE	FALSE	FALSE	FALSE	1	FALSE	FALSE	FALSE	FALSE	FALSE	FALSE	FALSE	FALSE	FALSE	FALSE	FALSE	FALSE	FALSE
575	Los Mansuetos	7.1	7.1		FALSE	FALSE	FALSE	FALSE	FALSE	FALSE	FALSE	FALSE	FALSE	FALSE	FALSE	FALSE	FALSE	FALSE	FALSE	FALSE	FALSE	FALSE	FALSE	FALSE	FALSE	FALSE	FALSE	FALSE	FALSE	FALSE	FALSE	FALSE	FALSE	FALSE	FALSE	1	FALSE	FALSE	FALSE	FALSE	FALSE	FALSE	FALSE	FALSE	FALSE	FALSE	FALSE	FALSE	FALSE
576	Aljezar B	7.1	7.1		FALSE	FALSE	FALSE	FALSE	FALSE	FALSE	FALSE	FALSE	FALSE	FALSE	FALSE	FALSE	FALSE	FALSE	FALSE	FALSE	FALSE	FALSE	FALSE	FALSE	FALSE	FALSE	FALSE	FALSE	FALSE	FALSE	FALSE	FALSE	FALSE	FALSE	FALSE	1	FALSE	FALSE	FALSE	FALSE	FALSE	FALSE	FALSE	FALSE	FALSE	FALSE	FALSE	FALSE	FALSE
577	Toril	7.1	7.1		FALSE	FALSE	FALSE	FALSE	FALSE	FALSE	FALSE	FALSE	FALSE	FALSE	FALSE	FALSE	FALSE	FALSE	FALSE	FALSE	FALSE	FALSE	FALSE	FALSE	FALSE	FALSE	FALSE	FALSE	FALSE	FALSE	FALSE	FALSE	FALSE	FALSE	FALSE	1	FALSE	FALSE	FALSE	FALSE	FALSE	FALSE	FALSE	FALSE	FALSE	FALSE	FALSE	FALSE	FALSE
578	Villalba Baja 2B	7.1	7.1		FALSE	FALSE	FALSE	FALSE	FALSE	FALSE	FALSE	FALSE	FALSE	FALSE	FALSE	FALSE	FALSE	FALSE	FALSE	FALSE	FALSE	FALSE	FALSE	FALSE	FALSE	FALSE	FALSE	FALSE	FALSE	FALSE	FALSE	FALSE	FALSE	FALSE	FALSE	1	FALSE	FALSE	FALSE	FALSE	FALSE	FALSE	FALSE	FALSE	FALSE	FALSE	FALSE	FALSE	FALSE
579	El Regajo 4	7.2	7.2		FALSE	FALSE	FALSE	FALSE	FALSE	FALSE	FALSE	FALSE	FALSE	FALSE	FALSE	FALSE	FALSE	FALSE	FALSE	FALSE	FALSE	FALSE	FALSE	FALSE	FALSE	FALSE	FALSE	FALSE	FALSE	FALSE	FALSE	FALSE	FALSE	FALSE	FALSE	FALSE	1	FALSE	FALSE	FALSE	FALSE	FALSE	FALSE	FALSE	FALSE	FALSE	FALSE	FALSE	FALSE
580	El Regajo 3	7.2	7.2		FALSE	FALSE	FALSE	FALSE	FALSE	FALSE	FALSE	FALSE	FALSE	FALSE	FALSE	FALSE	FALSE	FALSE	FALSE	FALSE	FALSE	FALSE	FALSE	FALSE	FALSE	FALSE	FALSE	FALSE	FALSE	FALSE	FALSE	FALSE	FALSE	FALSE	FALSE	FALSE	1	FALSE	FALSE	FALSE	FALSE	FALSE	FALSE	FALSE	FALSE	FALSE	FALSE	FALSE	FALSE
581	Masada del Valle 5	7.2	7.2		FALSE	FALSE	FALSE	FALSE	FALSE	FALSE	FALSE	FALSE	FALSE	FALSE	FALSE	FALSE	FALSE	FALSE	FALSE	FALSE	FALSE	FALSE	FALSE	FALSE	FALSE	FALSE	FALSE	FALSE	FALSE	FALSE	FALSE	FALSE	FALSE	FALSE	FALSE	FALSE	1	FALSE	FALSE	FALSE	FALSE	FALSE	FALSE	FALSE	FALSE	FALSE	FALSE	FALSE	FALSE
582	Cubla	7.2	7.2		FALSE	FALSE	FALSE	FALSE	FALSE	FALSE	FALSE	FALSE	FALSE	FALSE	FALSE	FALSE	FALSE	FALSE	FALSE	FALSE	FALSE	FALSE	FALSE	FALSE	FALSE	FALSE	FALSE	FALSE	FALSE	FALSE	FALSE	FALSE	FALSE	FALSE	FALSE	FALSE	1	FALSE	FALSE	FALSE	FALSE	FALSE	FALSE	FALSE	FALSE	FALSE	FALSE	FALSE	FALSE
583	Tortajada C	7.3	7.3		FALSE	FALSE	FALSE	FALSE	FALSE	FALSE	FALSE	FALSE	FALSE	FALSE	FALSE	FALSE	FALSE	FALSE	FALSE	FALSE	FALSE	FALSE	FALSE	FALSE	FALSE	FALSE	FALSE	FALSE	FALSE	FALSE	FALSE	FALSE	FALSE	FALSE	FALSE	FALSE	FALSE	1	FALSE	FALSE	FALSE	FALSE	FALSE	FALSE	FALSE	FALSE	FALSE	FALSE	FALSE
584	Masada Ruea 4	7.5	7.5		FALSE	FALSE	FALSE	FALSE	FALSE	FALSE	FALSE	FALSE	FALSE	FALSE	FALSE	FALSE	FALSE	FALSE	FALSE	FALSE	FALSE	FALSE	FALSE	FALSE	FALSE	FALSE	FALSE	FALSE	FALSE	FALSE	FALSE	FALSE	FALSE	FALSE	FALSE	FALSE	FALSE	FALSE	FALSE	1	FALSE	FALSE	FALSE	FALSE	FALSE	FALSE	FALSE	FALSE	FALSE
585	Masada Ruea 3	7.5	7.5		FALSE	FALSE	FALSE	FALSE	FALSE	FALSE	FALSE	FALSE	FALSE	FALSE	FALSE	FALSE	FALSE	FALSE	FALSE	FALSE	FALSE	FALSE	FALSE	FALSE	FALSE	FALSE	FALSE	FALSE	FALSE	FALSE	FALSE	FALSE	FALSE	FALSE	FALSE	FALSE	FALSE	FALSE	FALSE	1	FALSE	FALSE	FALSE	FALSE	FALSE	FALSE	FALSE	FALSE	FALSE
586	Masada del Valle 2	7.6	7.6		FALSE	FALSE	FALSE	FALSE	FALSE	FALSE	FALSE	FALSE	FALSE	FALSE	FALSE	FALSE	FALSE	FALSE	FALSE	FALSE	FALSE	FALSE	FALSE	FALSE	FALSE	FALSE	FALSE	FALSE	FALSE	FALSE	FALSE	FALSE	FALSE	FALSE	FALSE	FALSE	FALSE	FALSE	FALSE	FALSE	1	FALSE	FALSE	FALSE	FALSE	FALSE	FALSE	FALSE	FALSE
587	Tortajada B	7.7	7.7		FALSE	FALSE	FALSE	FALSE	FALSE	FALSE	FALSE	FALSE	FALSE	FALSE	FALSE	FALSE	FALSE	FALSE	FALSE	FALSE	FALSE	FALSE	FALSE	FALSE	FALSE	FALSE	FALSE	FALSE	FALSE	FALSE	FALSE	FALSE	FALSE	FALSE	FALSE	FALSE	FALSE	FALSE	FALSE	FALSE	FALSE	1	FALSE	FALSE	FALSE	FALSE	FALSE	FALSE	FALSE
588	Vivero de Pinos	8	8		FALSE	FALSE	FALSE	FALSE	FALSE	FALSE	FALSE	FALSE	FALSE	FALSE	FALSE	FALSE	FALSE	FALSE	FALSE	FALSE	FALSE	FALSE	FALSE	FALSE	FALSE	FALSE	FALSE	FALSE	FALSE	FALSE	FALSE	FALSE	FALSE	FALSE	FALSE	FALSE	FALSE	FALSE	FALSE	FALSE	FALSE	FALSE	FALSE	FALSE	1	FALSE	FALSE	FALSE	FALSE
589	Los Aguanaces 3	8.1	8.1		FALSE	FALSE	FALSE	FALSE	FALSE	FALSE	FALSE	FALSE	FALSE	FALSE	FALSE	FALSE	FALSE	FALSE	FALSE	FALSE	FALSE	FALSE	FALSE	FALSE	FALSE	FALSE	FALSE	FALSE	FALSE	FALSE	FALSE	FALSE	FALSE	FALSE	FALSE	FALSE	FALSE	FALSE	FALSE	FALSE	FALSE	FALSE	FALSE	FALSE	FALSE	1	FALSE	FALSE	FALSE
590	Los Aguanaces	8.2	8.2		FALSE	FALSE	FALSE	FALSE	FALSE	FALSE	FALSE	FALSE	FALSE	FALSE	FALSE	FALSE	FALSE	FALSE	FALSE	FALSE	FALSE	FALSE	FALSE	FALSE	FALSE	FALSE	FALSE	FALSE	FALSE	FALSE	FALSE	FALSE	FALSE	FALSE	FALSE	FALSE	FALSE	FALSE	FALSE	FALSE	FALSE	FALSE	FALSE	FALSE	FALSE	FALSE	1	FALSE	FALSE
591	Los Aguanaces 1	8.2	8.2		FALSE	FALSE	FALSE	FALSE	FALSE	FALSE	FALSE	FALSE	FALSE	FALSE	FALSE	FALSE	FALSE	FALSE	FALSE	FALSE	FALSE	FALSE	FALSE	FALSE	FALSE	FALSE	FALSE	FALSE	FALSE	FALSE	FALSE	FALSE	FALSE	FALSE	FALSE	FALSE	FALSE	FALSE	FALSE	FALSE	FALSE	FALSE	FALSE	FALSE	FALSE	FALSE	1	FALSE	FALSE
592	La Gloria 10	8.2	8.2		FALSE	FALSE	FALSE	FALSE	FALSE	FALSE	FALSE	FALSE	FALSE	FALSE	FALSE	FALSE	FALSE	FALSE	FALSE	FALSE	FALSE	FALSE	FALSE	FALSE	FALSE	FALSE	FALSE	FALSE	FALSE	FALSE	FALSE	FALSE	FALSE	FALSE	FALSE	FALSE	FALSE	FALSE	FALSE	FALSE	FALSE	FALSE	FALSE	FALSE	FALSE	FALSE	1	FALSE	FALSE
593	Puente Minero 3	8.4	8.4		FALSE	FALSE	FALSE	FALSE	FALSE	FALSE	FALSE	FALSE	FALSE	FALSE	FALSE	FALSE	FALSE	FALSE	FALSE	FALSE	FALSE	FALSE	FALSE	FALSE	FALSE	FALSE	FALSE	FALSE	FALSE	FALSE	FALSE	FALSE	FALSE	FALSE	FALSE	FALSE	FALSE	FALSE	FALSE	FALSE	FALSE	FALSE	FALSE	FALSE	FALSE	FALSE	FALSE	FALSE	1
594	Masada Ruea 2	8.4	8.4		FALSE	FALSE	FALSE	FALSE	FALSE	FALSE	FALSE	FALSE	FALSE	FALSE	FALSE	FALSE	FALSE	FALSE	FALSE	FALSE	FALSE	FALSE	FALSE	FALSE	FALSE	FALSE	FALSE	FALSE	FALSE	FALSE	FALSE	FALSE	FALSE	FALSE	FALSE	FALSE	FALSE	FALSE	FALSE	FALSE	FALSE	FALSE	FALSE	FALSE	FALSE	FALSE	FALSE	FALSE	1
595	Peralejos D	8.9	8.9		FALSE	FALSE	FALSE	FALSE	FALSE	FALSE	FALSE	FALSE	FALSE	FALSE	FALSE	FALSE	FALSE	FALSE	FALSE	FALSE	FALSE	FALSE	FALSE	FALSE	FALSE	FALSE	FALSE	FALSE	FALSE	FALSE	FALSE	FALSE	FALSE	FALSE	FALSE	FALSE	FALSE	FALSE	FALSE	FALSE	FALSE	FALSE	FALSE	FALSE	FALSE	FALSE	FALSE	FALSE	FALSE
596	La Gloria 11	9	9		FALSE	FALSE	FALSE	FALSE	FALSE	FALSE	FALSE	FALSE	FALSE	FALSE	FALSE	FALSE	FALSE	FALSE	FALSE	FALSE	FALSE	FALSE	FALSE	FALSE	FALSE	FALSE	FALSE	FALSE	FALSE	FALSE	FALSE	FALSE	FALSE	FALSE	FALSE	FALSE	FALSE	FALSE	FALSE	FALSE	FALSE	FALSE	FALSE	FALSE	FALSE	FALSE	FALSE	FALSE	FALSE
597	Los Aguanaces 5B	9	9		FALSE	FALSE	FALSE	FALSE	FALSE	FALSE	FALSE	FALSE	FALSE	FALSE	FALSE	FALSE	FALSE	FALSE	FALSE	FALSE	FALSE	FALSE	FALSE	FALSE	FALSE	FALSE	FALSE	FALSE	FALSE	FALSE	FALSE	FALSE	FALSE	FALSE	FALSE	FALSE	FALSE	FALSE	FALSE	FALSE	FALSE	FALSE	FALSE	FALSE	FALSE	FALSE	FALSE	FALSE	FALSE
598	La Roma 2	9.3	9.3		FALSE	FALSE	FALSE	FALSE	FALSE	FALSE	FALSE	FALSE	FALSE	FALSE	FALSE	FALSE	FALSE	FALSE	FALSE	FALSE	FALSE	FALSE	FALSE	FALSE	FALSE	FALSE	FALSE	FALSE	FALSE	FALSE	FALSE	FALSE	FALSE	FALSE	FALSE	FALSE	FALSE	FALSE	FALSE	FALSE	FALSE	FALSE	FALSE	FALSE	FALSE	FALSE	FALSE	FALSE	FALSE
599	La Roma 1	9.4	9.4		FALSE	FALSE	FALSE	FALSE	FALSE	FALSE	FALSE	FALSE	FALSE	FALSE	FALSE	FALSE	FALSE	FALSE	FALSE	FALSE	FALSE	FALSE	FALSE	FALSE	FALSE	FALSE	FALSE	FALSE	FALSE	FALSE	FALSE	FALSE	FALSE	FALSE	FALSE	FALSE	FALSE	FALSE	FALSE	FALSE	FALSE	FALSE	FALSE	FALSE	FALSE	FALSE	FALSE	FALSE	FALSE
600	Puente Minero 10	9.5	9.5		FALSE	FALSE	FALSE	FALSE	FALSE	FALSE	FALSE	FALSE	FALSE	FALSE	FALSE	FALSE	FALSE	FALSE	FALSE	FALSE	FALSE	FALSE	FALSE	FALSE	FALSE	FALSE	FALSE	FALSE	FALSE	FALSE	FALSE	FALSE	FALSE	FALSE	FALSE	FALSE	FALSE	FALSE	FALSE	FALSE	FALSE	FALSE	FALSE	FALSE	FALSE	FALSE	FALSE	FALSE	FALSE
601	Puente Minero 2	9.6	9.6		FALSE	FALSE	FALSE	FALSE	FALSE	FALSE	FALSE	FALSE	FALSE	FALSE	FALSE	FALSE	FALSE	FALSE	FALSE	FALSE	FALSE	FALSE	FALSE	FALSE	FALSE	FALSE	FALSE	FALSE	FALSE	FALSE	FALSE	FALSE	FALSE	FALSE	FALSE	FALSE	FALSE	FALSE	FALSE	FALSE	FALSE	FALSE	FALSE	FALSE	FALSE	FALSE	FALSE	FALSE	FALSE
602	Masia d.l. Roma 11	9.6	9.6		FALSE	FALSE	FALSE	FALSE	FALSE	FALSE	FALSE	FALSE	FALSE	FALSE	FALSE	FALSE	FALSE	FALSE	FALSE	FALSE	FALSE	FALSE	FALSE	FALSE	FALSE	FALSE	FALSE	FALSE	FALSE	FALSE	FALSE	FALSE	FALSE	FALSE	FALSE	FALSE	FALSE	FALSE	FALSE	FALSE	FALSE	FALSE	FALSE	FALSE	FALSE	FALSE	FALSE	FALSE	FALSE
603	Puente Minero 8B	9.7	9.7		FALSE	FALSE	FALSE	FALSE	FALSE	FALSE	FALSE	FALSE	FALSE	FALSE	FALSE	FALSE	FALSE	FALSE	FALSE	FALSE	FALSE	FALSE	FALSE	FALSE	FALSE	FALSE	FALSE	FALSE	FALSE	FALSE	FALSE	FALSE	FALSE	FALSE	FALSE	FALSE	FALSE	FALSE	FALSE	FALSE	FALSE	FALSE	FALSE	FALSE	FALSE	FALSE	FALSE	FALSE	FALSE
604	Puente Minero 8A	9.7	9.7		FALSE	FALSE	FALSE	FALSE	FALSE	FALSE	FALSE	FALSE	FALSE	FALSE	FALSE	FALSE	FALSE	FALSE	FALSE	FALSE	FALSE	FALSE	FALSE	FALSE	FALSE	FALSE	FALSE	FALSE	FALSE	FALSE	FALSE	FALSE	FALSE	FALSE	FALSE	FALSE	FALSE	FALSE	FALSE	FALSE	FALSE	FALSE	FALSE	FALSE	FALSE	FALSE	FALSE	FALSE	FALSE
605	Masia d.l. Roma 9	9.7	9.7		FALSE	FALSE	FALSE	FALSE	FALSE	FALSE	FALSE	FALSE	FALSE	FALSE	FALSE	FALSE	FALSE	FALSE	FALSE	FALSE	FALSE	FALSE	FALSE	FALSE	FALSE	FALSE	FALSE	FALSE	FALSE	FALSE	FALSE	FALSE	FALSE	FALSE	FALSE	FALSE	FALSE	FALSE	FALSE	FALSE	FALSE	FALSE	FALSE	FALSE	FALSE	FALSE	FALSE	FALSE	FALSE
606	Masia d.l. Roma 7	9.7	9.7		FALSE	FALSE	FALSE	FALSE	FALSE	FALSE	FALSE	FALSE	FALSE	FALSE	FALSE	FALSE	FALSE	FALSE	FALSE	FALSE	FALSE	FALSE	FALSE	FALSE	FALSE	FALSE	FALSE	FALSE	FALSE	FALSE	FALSE	FALSE	FALSE	FALSE	FALSE	FALSE	FALSE	FALSE	FALSE	FALSE	FALSE	FALSE	FALSE	FALSE	FALSE	FALSE	FALSE	FALSE	FALSE
607	Masia d.l. Roma 4C	9.9	9.9		FALSE	FALSE	FALSE	FALSE	FALSE	FALSE	FALSE	FALSE	FALSE	FALSE	FALSE	FALSE	FALSE	FALSE	FALSE	FALSE	FALSE	FALSE	FALSE	FALSE	FALSE	FALSE	FALSE	FALSE	FALSE	FALSE	FALSE	FALSE	FALSE	FALSE	FALSE	FALSE	FALSE	FALSE	FALSE	FALSE	FALSE	FALSE	FALSE	FALSE	FALSE	FALSE	FALSE	FALSE	FALSE
608	Masia d.l. Roma 4B	9.9	9.9		FALSE	FALSE	FALSE	FALSE	FALSE	FALSE	FALSE	FALSE	FALSE	FALSE	FALSE	FALSE	FALSE	FALSE	FALSE	FALSE	FALSE	FALSE	FALSE	FALSE	FALSE	FALSE	FALSE	FALSE	FALSE	FALSE	FALSE	FALSE	FALSE	FALSE	FALSE	FALSE	FALSE	FALSE	FALSE	FALSE	FALSE	FALSE	FALSE	FALSE	FALSE	FALSE	FALSE	FALSE	FALSE
609	Masia d.l. Roma 3	9.9	9.9		FALSE	FALSE	FALSE	FALSE	FALSE	FALSE	FALSE	FALSE	FALSE	FALSE	FALSE	FALSE	FALSE	FALSE	FALSE	FALSE	FALSE	FALSE	FALSE	FALSE	FALSE	FALSE	FALSE	FALSE	FALSE	FALSE	FALSE	FALSE	FALSE	FALSE	FALSE	FALSE	FALSE	FALSE	FALSE	FALSE	FALSE	FALSE	FALSE	FALSE	FALSE	FALSE	FALSE	FALSE	FALSE
610	Casacante 4	10.2	10.2		FALSE	FALSE	FALSE	FALSE	FALSE	FALSE	FALSE	FALSE	FALSE	FALSE	FALSE	FALSE	FALSE	FALSE	FALSE	FALSE	FALSE	FALSE	FALSE	FALSE	FALSE	FALSE	FALSE	FALSE	FALSE	FALSE	FALSE	FALSE	FALSE	FALSE	FALSE	FALSE	FALSE	FALSE	FALSE	FALSE	FALSE	FALSE	FALSE	FALSE	FALSE	FALSE	FALSE	FALSE	FALSE
611	Casas Altas	10.7	10.7		FALSE	FALSE	FALSE	FALSE	FALSE	FALSE	FALSE	FALSE	FALSE	FALSE	FALSE	FALSE	FALSE	FALSE	FALSE	FALSE	FALSE	FALSE	FALSE	FALSE	FALSE	FALSE	FALSE	FALSE	FALSE	FALSE	FALSE	FALSE	FALSE	FALSE	FALSE	FALSE	FALSE	FALSE	FALSE	FALSE	FALSE	FALSE	FALSE	FALSE	FALSE	FALSE	FALSE	FALSE	FALSE
612	Nombrevilla 1	10.8	10.8		FALSE	FALSE	FALSE	FALSE	FALSE	FALSE	FALSE	FALSE	FALSE	FALSE	FALSE	FALSE	FALSE	FALSE	FALSE	FALSE	FALSE	FALSE	FALSE	FALSE	FALSE	FALSE	FALSE	FALSE	FALSE	FALSE	FALSE	FALSE	FALSE	FALSE	FALSE	FALSE	FALSE	FALSE	FALSE	FALSE	FALSE	FALSE	FALSE	FALSE	FALSE	FALSE	FALSE	FALSE	FALSE
613	Abezames	8.7	11.2		FALSE	FALSE	FALSE	FALSE	FALSE	FALSE	FALSE	FALSE	FALSE	FALSE	FALSE	FALSE	FALSE	FALSE	FALSE	FALSE	FALSE	FALSE	FALSE	FALSE	FALSE	FALSE	FALSE	FALSE	FALSE	FALSE	FALSE	FALSE	FALSE	FALSE	FALSE	FALSE	FALSE	FALSE	FALSE	FALSE	FALSE	FALSE	FALSE	FALSE	FALSE	FALSE	FALSE	FALSE	FALSE
614	Achldorf	11	12		FALSE	FALSE	FALSE	FALSE	FALSE	FALSE	FALSE	FALSE	FALSE	FALSE	FALSE	FALSE	FALSE	FALSE	FALSE	FALSE	FALSE	FALSE	FALSE	FALSE	FALSE	FALSE	FALSE	FALSE	FALSE	FALSE	FALSE	FALSE	FALSE	FALSE	FALSE	FALSE	FALSE	FALSE	FALSE	FALSE	FALSE	FALSE	FALSE	FALSE	FALSE	FALSE	FALSE	FALSE	FALSE
615	Agarak	5.3	7.1		FALSE	FALSE	FALSE	FALSE	FALSE	FALSE	FALSE	FALSE	FALSE	FALSE	FALSE	FALSE	FALSE	1	1	1	1	1	1	1	1	1	1	1	1	1	1	1	1	1	1	1	FALSE	FALSE	FALSE	FALSE	FALSE	FALSE	FALSE	FALSE	FALSE	FALSE	FALSE	FALSE	FALSE
616	Balatonszentgyörgy	11	11.5		FALSE	FALSE	FALSE	FALSE	FALSE	FALSE	FALSE	FALSE	FALSE	FALSE	FALSE	FALSE	FALSE	FALSE	FALSE	FALSE	FALSE	FALSE	FALSE	FALSE	FALSE	FALSE	FALSE	FALSE	FALSE	FALSE	FALSE	FALSE	FALSE	FALSE	FALSE	FALSE	FALSE	FALSE	FALSE	FALSE	FALSE	FALSE	FALSE	FALSE	FALSE	FALSE	FALSE	FALSE	FALSE
617	Barbara	5.3	9		FALSE	FALSE	FALSE	FALSE	FALSE	FALSE	FALSE	FALSE	FALSE	FALSE	FALSE	FALSE	FALSE	1	1	1	1	1	1	1	1	1	1	1	1	1	1	1	1	1	1	1	1	1	1	1	1	1	1	1	1	1	1	1	1
618	Bou Regreg	5.7	6.7		FALSE	FALSE	FALSE	FALSE	FALSE	FALSE	FALSE	FALSE	FALSE	FALSE	FALSE	FALSE	FALSE	FALSE	FALSE	FALSE	FALSE	1	1	1	1	1	1	1	1	1	1	1	FALSE	FALSE	FALSE	FALSE	FALSE	FALSE	FALSE	FALSE	FALSE	FALSE	FALSE	FALSE	FALSE	FALSE	FALSE	FALSE	FALSE
619	Can vilella	6.6	6.7		FALSE	FALSE	FALSE	FALSE	FALSE	FALSE	FALSE	FALSE	FALSE	FALSE	FALSE	FALSE	FALSE	FALSE	FALSE	FALSE	FALSE	FALSE	FALSE	FALSE	FALSE	FALSE	FALSE	FALSE	FALSE	FALSE	1	1	FALSE	FALSE	FALSE	FALSE	FALSE	FALSE	FALSE	FALSE	FALSE	FALSE	FALSE	FALSE	FALSE	FALSE	FALSE	FALSE	FALSE
620	Capodarso	6	6.3		FALSE	FALSE	FALSE	FALSE	FALSE	FALSE	FALSE	FALSE	FALSE	FALSE	FALSE	FALSE	FALSE	FALSE	FALSE	FALSE	FALSE	FALSE	FALSE	FALSE	1	1	1	1	FALSE	FALSE	FALSE	FALSE	FALSE	FALSE	FALSE	FALSE	FALSE	FALSE	FALSE	FALSE	FALSE	FALSE	FALSE	FALSE	FALSE	FALSE	FALSE	FALSE	FALSE
621	Carmona	6.1	6.3		FALSE	FALSE	FALSE	FALSE	FALSE	FALSE	FALSE	FALSE	FALSE	FALSE	FALSE	FALSE	FALSE	FALSE	FALSE	FALSE	FALSE	FALSE	FALSE	FALSE	FALSE	1	1	1	FALSE	FALSE	FALSE	FALSE	FALSE	FALSE	FALSE	FALSE	FALSE	FALSE	FALSE	FALSE	FALSE	FALSE	FALSE	FALSE	FALSE	FALSE	FALSE	FALSE	FALSE
622	Douiet 1	6.4	6.7		FALSE	FALSE	FALSE	FALSE	FALSE	FALSE	FALSE	FALSE	FALSE	FALSE	FALSE	FALSE	FALSE	FALSE	FALSE	FALSE	FALSE	FALSE	FALSE	FALSE	FALSE	FALSE	FALSE	FALSE	1	1	1	1	FALSE	FALSE	FALSE	FALSE	FALSE	FALSE	FALSE	FALSE	FALSE	FALSE	FALSE	FALSE	FALSE	FALSE	FALSE	FALSE	FALSE
623	Site 380A	5.7	6.2		FALSE	FALSE	FALSE	FALSE	FALSE	FALSE	FALSE	FALSE	FALSE	FALSE	FALSE	FALSE	FALSE	FALSE	FALSE	FALSE	FALSE	1	1	1	1	1	1	FALSE	FALSE	FALSE	FALSE	FALSE	FALSE	FALSE	FALSE	FALSE	FALSE	FALSE	FALSE	FALSE	FALSE	FALSE	FALSE	FALSE	FALSE	FALSE	FALSE	FALSE	FALSE
624	Lower Jakokkota	10.6	10.7		FALSE	FALSE	FALSE	FALSE	FALSE	FALSE	FALSE	FALSE	FALSE	FALSE	FALSE	FALSE	FALSE	FALSE	FALSE	FALSE	FALSE	FALSE	FALSE	FALSE	FALSE	FALSE	FALSE	FALSE	FALSE	FALSE	FALSE	FALSE	FALSE	FALSE	FALSE	FALSE	FALSE	FALSE	FALSE	FALSE	FALSE	FALSE	FALSE	FALSE	FALSE	FALSE	FALSE	FALSE	FALSE
625	Fingerrock Nevada	8	13		FALSE	FALSE	FALSE	FALSE	FALSE	FALSE	FALSE	FALSE	FALSE	FALSE	FALSE	FALSE	FALSE	FALSE	FALSE	FALSE	FALSE	FALSE	FALSE	FALSE	FALSE	FALSE	FALSE	FALSE	FALSE	FALSE	FALSE	FALSE	FALSE	FALSE	FALSE	FALSE	FALSE	FALSE	FALSE	FALSE	FALSE	FALSE	FALSE	FALSE	1	1	1	1	1
626	Deleina	10	11.6		FALSE	FALSE	FALSE	FALSE	FALSE	FALSE	FALSE	FALSE	FALSE	FALSE	FALSE	FALSE	FALSE	FALSE	FALSE	FALSE	FALSE	FALSE	FALSE	FALSE	FALSE	FALSE	FALSE	FALSE	FALSE	FALSE	FALSE	FALSE	FALSE	FALSE	FALSE	FALSE	FALSE	FALSE	FALSE	FALSE	FALSE	FALSE	FALSE	FALSE	FALSE	FALSE	FALSE	FALSE	FALSE
627	Deleina	10	11.6		FALSE	FALSE	FALSE	FALSE	FALSE	FALSE	FALSE	FALSE	FALSE	FALSE	FALSE	FALSE	FALSE	FALSE	FALSE	FALSE	FALSE	FALSE	FALSE	FALSE	FALSE	FALSE	FALSE	FALSE	FALSE	FALSE	FALSE	FALSE	FALSE	FALSE	FALSE	FALSE	FALSE	FALSE	FALSE	FALSE	FALSE	FALSE	FALSE	FALSE	FALSE	FALSE	FALSE	FALSE	FALSE
628	Deleina	10	11.6		FALSE	FALSE	FALSE	FALSE	FALSE	FALSE	FALSE	FALSE	FALSE	FALSE	FALSE	FALSE	FALSE	FALSE	FALSE	FALSE	FALSE	FALSE	FALSE	FALSE	FALSE	FALSE	FALSE	FALSE	FALSE	FALSE	FALSE	FALSE	FALSE	FALSE	FALSE	FALSE	FALSE	FALSE	FALSE	FALSE	FALSE	FALSE	FALSE	FALSE	FALSE	FALSE	FALSE	FALSE	FALSE
629	Deleina	10	11.6		FALSE	FALSE	FALSE	FALSE	FALSE	FALSE	FALSE	FALSE	FALSE	FALSE	FALSE	FALSE	FALSE	FALSE	FALSE	FALSE	FALSE	FALSE	FALSE	FALSE	FALSE	FALSE	FALSE	FALSE	FALSE	FALSE	FALSE	FALSE	FALSE	FALSE	FALSE	FALSE	FALSE	FALSE	FALSE	FALSE	FALSE	FALSE	FALSE	FALSE	FALSE	FALSE	FALSE	FALSE	FALSE
630	Deleina	10	11.6		FALSE	FALSE	FALSE	FALSE	FALSE	FALSE	FALSE	FALSE	FALSE	FALSE	FALSE	FALSE	FALSE	FALSE	FALSE	FALSE	FALSE	FALSE	FALSE	FALSE	FALSE	FALSE	FALSE	FALSE	FALSE	FALSE	FALSE	FALSE	FALSE	FALSE	FALSE	FALSE	FALSE	FALSE	FALSE	FALSE	FALSE	FALSE	FALSE	FALSE	FALSE	FALSE	FALSE	FALSE	FALSE
638	Drenovets	6	7.1		FALSE	FALSE	FALSE	FALSE	FALSE	FALSE	FALSE	FALSE	FALSE	FALSE	FALSE	FALSE	FALSE	FALSE	FALSE	FALSE	FALSE	FALSE	FALSE	FALSE	1	1	1	1	1	1	1	1	1	1	1	1	FALSE	FALSE	FALSE	FALSE	FALSE	FALSE	FALSE	FALSE	FALSE	FALSE	FALSE	FALSE	FALSE
639	Drenovets	7.1	9		FALSE	FALSE	FALSE	FALSE	FALSE	FALSE	FALSE	FALSE	FALSE	FALSE	FALSE	FALSE	FALSE	FALSE	FALSE	FALSE	FALSE	FALSE	FALSE	FALSE	FALSE	FALSE	FALSE	FALSE	FALSE	FALSE	FALSE	FALSE	FALSE	FALSE	FALSE	1	1	1	1	1	1	1	1	1	1	1	1	1	1
640	Drenovets	6	7.1		FALSE	FALSE	FALSE	FALSE	FALSE	FALSE	FALSE	FALSE	FALSE	FALSE	FALSE	FALSE	FALSE	FALSE	FALSE	FALSE	FALSE	FALSE	FALSE	FALSE	1	1	1	1	1	1	1	1	1	1	1	1	FALSE	FALSE	FALSE	FALSE	FALSE	FALSE	FALSE	FALSE	FALSE	FALSE	FALSE	FALSE	FALSE
644	Drenovets	9	10		FALSE	FALSE	FALSE	FALSE	FALSE	FALSE	FALSE	FALSE	FALSE	FALSE	FALSE	FALSE	FALSE	FALSE	FALSE	FALSE	FALSE	FALSE	FALSE	FALSE	FALSE	FALSE	FALSE	FALSE	FALSE	FALSE	FALSE	FALSE	FALSE	FALSE	FALSE	FALSE	FALSE	FALSE	FALSE	FALSE	FALSE	FALSE	FALSE	FALSE	FALSE	FALSE	FALSE	FALSE	FALSE
649	Drenovets	7.1	9		FALSE	FALSE	FALSE	FALSE	FALSE	FALSE	FALSE	FALSE	FALSE	FALSE	FALSE	FALSE	FALSE	FALSE	FALSE	FALSE	FALSE	FALSE	FALSE	FALSE	FALSE	FALSE	FALSE	FALSE	FALSE	FALSE	FALSE	FALSE	FALSE	FALSE	FALSE	1	1	1	1	1	1	1	1	1	1	1	1	1	1
650	Drenovets	9	10		FALSE	FALSE	FALSE	FALSE	FALSE	FALSE	FALSE	FALSE	FALSE	FALSE	FALSE	FALSE	FALSE	FALSE	FALSE	FALSE	FALSE	FALSE	FALSE	FALSE	FALSE	FALSE	FALSE	FALSE	FALSE	FALSE	FALSE	FALSE	FALSE	FALSE	FALSE	FALSE	FALSE	FALSE	FALSE	FALSE	FALSE	FALSE	FALSE	FALSE	FALSE	FALSE	FALSE	FALSE	FALSE
651	Drenovets	9	10		FALSE	FALSE	FALSE	FALSE	FALSE	FALSE	FALSE	FALSE	FALSE	FALSE	FALSE	FALSE	FALSE	FALSE	FALSE	FALSE	FALSE	FALSE	FALSE	FALSE	FALSE	FALSE	FALSE	FALSE	FALSE	FALSE	FALSE	FALSE	FALSE	FALSE	FALSE	FALSE	FALSE	FALSE	FALSE	FALSE	FALSE	FALSE	FALSE	FALSE	FALSE	FALSE	FALSE	FALSE	FALSE
652	Drenovets	7.1	9		FALSE	FALSE	FALSE	FALSE	FALSE	FALSE	FALSE	FALSE	FALSE	FALSE	FALSE	FALSE	FALSE	FALSE	FALSE	FALSE	FALSE	FALSE	FALSE	FALSE	FALSE	FALSE	FALSE	FALSE	FALSE	FALSE	FALSE	FALSE	FALSE	FALSE	FALSE	1	1	1	1	1	1	1	1	1	1	1	1	1	1
653	Drenovets	7.1	9		FALSE	FALSE	FALSE	FALSE	FALSE	FALSE	FALSE	FALSE	FALSE	FALSE	FALSE	FALSE	FALSE	FALSE	FALSE	FALSE	FALSE	FALSE	FALSE	FALSE	FALSE	FALSE	FALSE	FALSE	FALSE	FALSE	FALSE	FALSE	FALSE	FALSE	FALSE	1	1	1	1	1	1	1	1	1	1	1	1	1	1
654	Drenovets	7.1	9		FALSE	FALSE	FALSE	FALSE	FALSE	FALSE	FALSE	FALSE	FALSE	FALSE	FALSE	FALSE	FALSE	FALSE	FALSE	FALSE	FALSE	FALSE	FALSE	FALSE	FALSE	FALSE	FALSE	FALSE	FALSE	FALSE	FALSE	FALSE	FALSE	FALSE	FALSE	1	1	1	1	1	1	1	1	1	1	1	1	1	1
655	Drenovets	7.1	9		FALSE	FALSE	FALSE	FALSE	FALSE	FALSE	FALSE	FALSE	FALSE	FALSE	FALSE	FALSE	FALSE	FALSE	FALSE	FALSE	FALSE	FALSE	FALSE	FALSE	FALSE	FALSE	FALSE	FALSE	FALSE	FALSE	FALSE	FALSE	FALSE	FALSE	FALSE	1	1	1	1	1	1	1	1	1	1	1	1	1	1
656	Drenovets	7.1	9		FALSE	FALSE	FALSE	FALSE	FALSE	FALSE	FALSE	FALSE	FALSE	FALSE	FALSE	FALSE	FALSE	FALSE	FALSE	FALSE	FALSE	FALSE	FALSE	FALSE	FALSE	FALSE	FALSE	FALSE	FALSE	FALSE	FALSE	FALSE	FALSE	FALSE	FALSE	1	1	1	1	1	1	1	1	1	1	1	1	1	1
657	Drenovets	7.1	9		FALSE	FALSE	FALSE	FALSE	FALSE	FALSE	FALSE	FALSE	FALSE	FALSE	FALSE	FALSE	FALSE	FALSE	FALSE	FALSE	FALSE	FALSE	FALSE	FALSE	FALSE	FALSE	FALSE	FALSE	FALSE	FALSE	FALSE	FALSE	FALSE	FALSE	FALSE	1	1	1	1	1	1	1	1	1	1	1	1	1	1
658	Drenovets	7.1	9		FALSE	FALSE	FALSE	FALSE	FALSE	FALSE	FALSE	FALSE	FALSE	FALSE	FALSE	FALSE	FALSE	FALSE	FALSE	FALSE	FALSE	FALSE	FALSE	FALSE	FALSE	FALSE	FALSE	FALSE	FALSE	FALSE	FALSE	FALSE	FALSE	FALSE	FALSE	1	1	1	1	1	1	1	1	1	1	1	1	1	1
659	Drenovets	7.1	9		FALSE	FALSE	FALSE	FALSE	FALSE	FALSE	FALSE	FALSE	FALSE	FALSE	FALSE	FALSE	FALSE	FALSE	FALSE	FALSE	FALSE	FALSE	FALSE	FALSE	FALSE	FALSE	FALSE	FALSE	FALSE	FALSE	FALSE	FALSE	FALSE	FALSE	FALSE	1	1	1	1	1	1	1	1	1	1	1	1	1	1
660	Drenovets	9	10		FALSE	FALSE	FALSE	FALSE	FALSE	FALSE	FALSE	FALSE	FALSE	FALSE	FALSE	FALSE	FALSE	FALSE	FALSE	FALSE	FALSE	FALSE	FALSE	FALSE	FALSE	FALSE	FALSE	FALSE	FALSE	FALSE	FALSE	FALSE	FALSE	FALSE	FALSE	FALSE	FALSE	FALSE	FALSE	FALSE	FALSE	FALSE	FALSE	FALSE	FALSE	FALSE	FALSE	FALSE	FALSE
661	Drenovets	7.1	9		FALSE	FALSE	FALSE	FALSE	FALSE	FALSE	FALSE	FALSE	FALSE	FALSE	FALSE	FALSE	FALSE	FALSE	FALSE	FALSE	FALSE	FALSE	FALSE	FALSE	FALSE	FALSE	FALSE	FALSE	FALSE	FALSE	FALSE	FALSE	FALSE	FALSE	FALSE	1	1	1	1	1	1	1	1	1	1	1	1	1	1
662	Drenovets	6	7.1		FALSE	FALSE	FALSE	FALSE	FALSE	FALSE	FALSE	FALSE	FALSE	FALSE	FALSE	FALSE	FALSE	FALSE	FALSE	FALSE	FALSE	FALSE	FALSE	FALSE	1	1	1	1	1	1	1	1	1	1	1	1	FALSE	FALSE	FALSE	FALSE	FALSE	FALSE	FALSE	FALSE	FALSE	FALSE	FALSE	FALSE	FALSE
664	Drenovets	6	7.1		FALSE	FALSE	FALSE	FALSE	FALSE	FALSE	FALSE	FALSE	FALSE	FALSE	FALSE	FALSE	FALSE	FALSE	FALSE	FALSE	FALSE	FALSE	FALSE	FALSE	1	1	1	1	1	1	1	1	1	1	1	1	FALSE	FALSE	FALSE	FALSE	FALSE	FALSE	FALSE	FALSE	FALSE	FALSE	FALSE	FALSE	FALSE
665	Drenovets	9	10		FALSE	FALSE	FALSE	FALSE	FALSE	FALSE	FALSE	FALSE	FALSE	FALSE	FALSE	FALSE	FALSE	FALSE	FALSE	FALSE	FALSE	FALSE	FALSE	FALSE	FALSE	FALSE	FALSE	FALSE	FALSE	FALSE	FALSE	FALSE	FALSE	FALSE	FALSE	FALSE	FALSE	FALSE	FALSE	FALSE	FALSE	FALSE	FALSE	FALSE	FALSE	FALSE	FALSE	FALSE	FALSE
666	Drenovets	9	10		FALSE	FALSE	FALSE	FALSE	FALSE	FALSE	FALSE	FALSE	FALSE	FALSE	FALSE	FALSE	FALSE	FALSE	FALSE	FALSE	FALSE	FALSE	FALSE	FALSE	FALSE	FALSE	FALSE	FALSE	FALSE	FALSE	FALSE	FALSE	FALSE	FALSE	FALSE	FALSE	FALSE	FALSE	FALSE	FALSE	FALSE	FALSE	FALSE	FALSE	FALSE	FALSE	FALSE	FALSE	FALSE
667	Drenovets	6	7.1		FALSE	FALSE	FALSE	FALSE	FALSE	FALSE	FALSE	FALSE	FALSE	FALSE	FALSE	FALSE	FALSE	FALSE	FALSE	FALSE	FALSE	FALSE	FALSE	FALSE	1	1	1	1	1	1	1	1	1	1	1	1	FALSE	FALSE	FALSE	FALSE	FALSE	FALSE	FALSE	FALSE	FALSE	FALSE	FALSE	FALSE	FALSE
671	Mt. Charay	7.3	11.6		FALSE	FALSE	FALSE	FALSE	FALSE	FALSE	FALSE	FALSE	FALSE	FALSE	FALSE	FALSE	FALSE	FALSE	FALSE	FALSE	FALSE	FALSE	FALSE	FALSE	FALSE	FALSE	FALSE	FALSE	FALSE	FALSE	FALSE	FALSE	FALSE	FALSE	FALSE	FALSE	FALSE	1	1	1	1	1	1	1	1	1	1	1	1
672	Odessa	7.3	11.6		FALSE	FALSE	FALSE	FALSE	FALSE	FALSE	FALSE	FALSE	FALSE	FALSE	FALSE	FALSE	FALSE	FALSE	FALSE	FALSE	FALSE	FALSE	FALSE	FALSE	FALSE	FALSE	FALSE	FALSE	FALSE	FALSE	FALSE	FALSE	FALSE	FALSE	FALSE	FALSE	FALSE	1	1	1	1	1	1	1	1	1	1	1	1
673	Rochessauve	7.3	11.6		FALSE	FALSE	FALSE	FALSE	FALSE	FALSE	FALSE	FALSE	FALSE	FALSE	FALSE	FALSE	FALSE	FALSE	FALSE	FALSE	FALSE	FALSE	FALSE	FALSE	FALSE	FALSE	FALSE	FALSE	FALSE	FALSE	FALSE	FALSE	FALSE	FALSE	FALSE	FALSE	FALSE	1	1	1	1	1	1	1	1	1	1	1	1
674	Sosnica	7.3	11.6		FALSE	FALSE	FALSE	FALSE	FALSE	FALSE	FALSE	FALSE	FALSE	FALSE	FALSE	FALSE	FALSE	FALSE	FALSE	FALSE	FALSE	FALSE	FALSE	FALSE	FALSE	FALSE	FALSE	FALSE	FALSE	FALSE	FALSE	FALSE	FALSE	FALSE	FALSE	FALSE	FALSE	1	1	1	1	1	1	1	1	1	1	1	1
675	Sprendlingen	7.3	11.6		FALSE	FALSE	FALSE	FALSE	FALSE	FALSE	FALSE	FALSE	FALSE	FALSE	FALSE	FALSE	FALSE	FALSE	FALSE	FALSE	FALSE	FALSE	FALSE	FALSE	FALSE	FALSE	FALSE	FALSE	FALSE	FALSE	FALSE	FALSE	FALSE	FALSE	FALSE	FALSE	FALSE	1	1	1	1	1	1	1	1	1	1	1	1
676	SE-Australia	9.5	13.5		FALSE	FALSE	FALSE	FALSE	FALSE	FALSE	FALSE	FALSE	FALSE	FALSE	FALSE	FALSE	FALSE	FALSE	FALSE	FALSE	FALSE	FALSE	FALSE	FALSE	FALSE	FALSE	FALSE	FALSE	FALSE	FALSE	FALSE	FALSE	FALSE	FALSE	FALSE	FALSE	FALSE	FALSE	FALSE	FALSE	FALSE	FALSE	FALSE	FALSE	FALSE	FALSE	FALSE	FALSE	FALSE
677	Lachlan River valley	9.5	13.5		FALSE	FALSE	FALSE	FALSE	FALSE	FALSE	FALSE	FALSE	FALSE	FALSE	FALSE	FALSE	FALSE	FALSE	FALSE	FALSE	FALSE	FALSE	FALSE	FALSE	FALSE	FALSE	FALSE	FALSE	FALSE	FALSE	FALSE	FALSE	FALSE	FALSE	FALSE	FALSE	FALSE	FALSE	FALSE	FALSE	FALSE	FALSE	FALSE	FALSE	FALSE	FALSE	FALSE	FALSE	FALSE
679	Klettwitz	9	11		FALSE	FALSE	FALSE	FALSE	FALSE	FALSE	FALSE	FALSE	FALSE	FALSE	FALSE	FALSE	FALSE	FALSE	FALSE	FALSE	FALSE	FALSE	FALSE	FALSE	FALSE	FALSE	FALSE	FALSE	FALSE	FALSE	FALSE	FALSE	FALSE	FALSE	FALSE	FALSE	FALSE	FALSE	FALSE	FALSE	FALSE	FALSE	FALSE	FALSE	FALSE	FALSE	FALSE	FALSE	FALSE
682	Vösendorf	9.5	11		FALSE	FALSE	FALSE	FALSE	FALSE	FALSE	FALSE	FALSE	FALSE	FALSE	FALSE	FALSE	FALSE	FALSE	FALSE	FALSE	FALSE	FALSE	FALSE	FALSE	FALSE	FALSE	FALSE	FALSE	FALSE	FALSE	FALSE	FALSE	FALSE	FALSE	FALSE	FALSE	FALSE	FALSE	FALSE	FALSE	FALSE	FALSE	FALSE	FALSE	FALSE	FALSE	FALSE	FALSE	FALSE
683	Jidon Basin	9.5	13.5		FALSE	FALSE	FALSE	FALSE	FALSE	FALSE	FALSE	FALSE	FALSE	FALSE	FALSE	FALSE	FALSE	FALSE	FALSE	FALSE	FALSE	FALSE	FALSE	FALSE	FALSE	FALSE	FALSE	FALSE	FALSE	FALSE	FALSE	FALSE	FALSE	FALSE	FALSE	FALSE	FALSE	FALSE	FALSE	FALSE	FALSE	FALSE	FALSE	FALSE	FALSE	FALSE	FALSE	FALSE	FALSE
685	Daphnedes	9	11.5		FALSE	FALSE	FALSE	FALSE	FALSE	FALSE	FALSE	FALSE	FALSE	FALSE	FALSE	FALSE	FALSE	FALSE	FALSE	FALSE	FALSE	FALSE	FALSE	FALSE	FALSE	FALSE	FALSE	FALSE	FALSE	FALSE	FALSE	FALSE	FALSE	FALSE	FALSE	FALSE	FALSE	FALSE	FALSE	FALSE	FALSE	FALSE	FALSE	FALSE	FALSE	FALSE	FALSE	FALSE	FALSE
686	Dorheim	5	9		FALSE	FALSE	FALSE	FALSE	FALSE	FALSE	FALSE	FALSE	FALSE	FALSE	2	2	2	1	1	1	1	1	1	1	1	1	1	1	1	1	1	1	1	1	1	1	1	1	1	1	1	1	1	1	1	1	1	1	1
687	Ebersbrunn	7.1	11.5		FALSE	FALSE	FALSE	FALSE	FALSE	FALSE	FALSE	FALSE	FALSE	FALSE	FALSE	FALSE	FALSE	FALSE	FALSE	FALSE	FALSE	FALSE	FALSE	FALSE	FALSE	FALSE	FALSE	FALSE	FALSE	FALSE	FALSE	FALSE	FALSE	FALSE	FALSE	1	1	1	1	1	1	1	1	1	1	1	1	1	1
688	Gabbro	5.3	9		FALSE	FALSE	FALSE	FALSE	FALSE	FALSE	FALSE	FALSE	FALSE	FALSE	FALSE	FALSE	FALSE	1	1	1	1	1	1	1	1	1	1	1	1	1	1	1	1	1	1	1	1	1	1	1	1	1	1	1	1	1	1	1	1
689	Höllgraben	11	11.5		FALSE	FALSE	FALSE	FALSE	FALSE	FALSE	FALSE	FALSE	FALSE	FALSE	FALSE	FALSE	FALSE	FALSE	FALSE	FALSE	FALSE	FALSE	FALSE	FALSE	FALSE	FALSE	FALSE	FALSE	FALSE	FALSE	FALSE	FALSE	FALSE	FALSE	FALSE	FALSE	FALSE	FALSE	FALSE	FALSE	FALSE	FALSE	FALSE	FALSE	FALSE	FALSE	FALSE	FALSE	FALSE
692	Kaiyuan	5.3	11.6		FALSE	FALSE	FALSE	FALSE	FALSE	FALSE	FALSE	FALSE	FALSE	FALSE	FALSE	FALSE	FALSE	1	1	1	1	1	1	1	1	1	1	1	1	1	1	1	1	1	1	1	1	1	1	1	1	1	1	1	1	1	1	1	1
693	Kunovice	11	11.5		FALSE	FALSE	FALSE	FALSE	FALSE	FALSE	FALSE	FALSE	FALSE	FALSE	FALSE	FALSE	FALSE	FALSE	FALSE	FALSE	FALSE	FALSE	FALSE	FALSE	FALSE	FALSE	FALSE	FALSE	FALSE	FALSE	FALSE	FALSE	FALSE	FALSE	FALSE	FALSE	FALSE	FALSE	FALSE	FALSE	FALSE	FALSE	FALSE	FALSE	FALSE	FALSE	FALSE	FALSE	FALSE
694	Mistrin	10.6	11		FALSE	FALSE	FALSE	FALSE	FALSE	FALSE	FALSE	FALSE	FALSE	FALSE	FALSE	FALSE	FALSE	FALSE	FALSE	FALSE	FALSE	FALSE	FALSE	FALSE	FALSE	FALSE	FALSE	FALSE	FALSE	FALSE	FALSE	FALSE	FALSE	FALSE	FALSE	FALSE	FALSE	FALSE	FALSE	FALSE	FALSE	FALSE	FALSE	FALSE	FALSE	FALSE	FALSE	FALSE	FALSE
695	Sachalin	5.3	11.6		FALSE	FALSE	FALSE	FALSE	FALSE	FALSE	FALSE	FALSE	FALSE	FALSE	FALSE	FALSE	FALSE	1	1	1	1	1	1	1	1	1	1	1	1	1	1	1	1	1	1	1	1	1	1	1	1	1	1	1	1	1	1	1	1
696	Sremska	7.1	11.5		FALSE	FALSE	FALSE	FALSE	FALSE	FALSE	FALSE	FALSE	FALSE	FALSE	FALSE	FALSE	FALSE	FALSE	FALSE	FALSE	FALSE	FALSE	FALSE	FALSE	FALSE	FALSE	FALSE	FALSE	FALSE	FALSE	FALSE	FALSE	FALSE	FALSE	FALSE	1	1	1	1	1	1	1	1	1	1	1	1	1	1
697	Stegersbach	9	10.6		FALSE	FALSE	FALSE	FALSE	FALSE	FALSE	FALSE	FALSE	FALSE	FALSE	FALSE	FALSE	FALSE	FALSE	FALSE	FALSE	FALSE	FALSE	FALSE	FALSE	FALSE	FALSE	FALSE	FALSE	FALSE	FALSE	FALSE	FALSE	FALSE	FALSE	FALSE	FALSE	FALSE	FALSE	FALSE	FALSE	FALSE	FALSE	FALSE	FALSE	FALSE	FALSE	FALSE	FALSE	FALSE
698	Wien B-C	10.6	11.5		FALSE	FALSE	FALSE	FALSE	FALSE	FALSE	FALSE	FALSE	FALSE	FALSE	FALSE	FALSE	FALSE	FALSE	FALSE	FALSE	FALSE	FALSE	FALSE	FALSE	FALSE	FALSE	FALSE	FALSE	FALSE	FALSE	FALSE	FALSE	FALSE	FALSE	FALSE	FALSE	FALSE	FALSE	FALSE	FALSE	FALSE	FALSE	FALSE	FALSE	FALSE	FALSE	FALSE	FALSE	FALSE
700	Chaplinka	5.3	7.1		FALSE	FALSE	FALSE	FALSE	FALSE	FALSE	FALSE	FALSE	FALSE	FALSE	FALSE	FALSE	FALSE	1	1	1	1	1	1	1	1	1	1	1	1	1	1	1	1	1	1	1	FALSE	FALSE	FALSE	FALSE	FALSE	FALSE	FALSE	FALSE	FALSE	FALSE	FALSE	FALSE	FALSE
701	Emetovka	7.1	10		FALSE	FALSE	FALSE	FALSE	FALSE	FALSE	FALSE	FALSE	FALSE	FALSE	FALSE	FALSE	FALSE	FALSE	FALSE	FALSE	FALSE	FALSE	FALSE	FALSE	FALSE	FALSE	FALSE	FALSE	FALSE	FALSE	FALSE	FALSE	FALSE	FALSE	FALSE	1	1	1	1	1	1	1	1	1	1	1	1	1	1
702	Emetovka	7.1	10		FALSE	FALSE	FALSE	FALSE	FALSE	FALSE	FALSE	FALSE	FALSE	FALSE	FALSE	FALSE	FALSE	FALSE	FALSE	FALSE	FALSE	FALSE	FALSE	FALSE	FALSE	FALSE	FALSE	FALSE	FALSE	FALSE	FALSE	FALSE	FALSE	FALSE	FALSE	1	1	1	1	1	1	1	1	1	1	1	1	1	1
703	Emetovka	10	13		FALSE	FALSE	FALSE	FALSE	FALSE	FALSE	FALSE	FALSE	FALSE	FALSE	FALSE	FALSE	FALSE	FALSE	FALSE	FALSE	FALSE	FALSE	FALSE	FALSE	FALSE	FALSE	FALSE	FALSE	FALSE	FALSE	FALSE	FALSE	FALSE	FALSE	FALSE	FALSE	FALSE	FALSE	FALSE	FALSE	FALSE	FALSE	FALSE	FALSE	FALSE	FALSE	FALSE	FALSE	FALSE
710	Frechen	5.3	11		FALSE	FALSE	FALSE	FALSE	FALSE	FALSE	FALSE	FALSE	FALSE	FALSE	FALSE	FALSE	FALSE	1	1	1	1	1	1	1	1	1	1	1	1	1	1	1	1	1	1	1	1	1	1	1	1	1	1	1	1	1	1	1	1
711	Opencast_Garzweiler	5.3	11		FALSE	FALSE	FALSE	FALSE	FALSE	FALSE	FALSE	FALSE	FALSE	FALSE	FALSE	FALSE	FALSE	1	1	1	1	1	1	1	1	1	1	1	1	1	1	1	1	1	1	1	1	1	1	1	1	1	1	1	1	1	1	1	1
712	Hambach Lignite Mine	5.3	11		FALSE	FALSE	FALSE	FALSE	FALSE	FALSE	FALSE	FALSE	FALSE	FALSE	FALSE	FALSE	FALSE	1	1	1	1	1	1	1	1	1	1	1	1	1	1	1	1	1	1	1	1	1	1	1	1	1	1	1	1	1	1	1	1
713	Hambach Lignite Mine	5.3	11		FALSE	FALSE	FALSE	FALSE	FALSE	FALSE	FALSE	FALSE	FALSE	FALSE	FALSE	FALSE	FALSE	1	1	1	1	1	1	1	1	1	1	1	1	1	1	1	1	1	1	1	1	1	1	1	1	1	1	1	1	1	1	1	1
714	Hambach Lignite Mine	5.3	11		FALSE	FALSE	FALSE	FALSE	FALSE	FALSE	FALSE	FALSE	FALSE	FALSE	FALSE	FALSE	FALSE	1	1	1	1	1	1	1	1	1	1	1	1	1	1	1	1	1	1	1	1	1	1	1	1	1	1	1	1	1	1	1	1
715	Hambach Lignite Mine	5.3	11		FALSE	FALSE	FALSE	FALSE	FALSE	FALSE	FALSE	FALSE	FALSE	FALSE	FALSE	FALSE	FALSE	1	1	1	1	1	1	1	1	1	1	1	1	1	1	1	1	1	1	1	1	1	1	1	1	1	1	1	1	1	1	1	1
716	Hambach Lignite Mine	5.3	11		FALSE	FALSE	FALSE	FALSE	FALSE	FALSE	FALSE	FALSE	FALSE	FALSE	FALSE	FALSE	FALSE	1	1	1	1	1	1	1	1	1	1	1	1	1	1	1	1	1	1	1	1	1	1	1	1	1	1	1	1	1	1	1	1
717	Hambach Lignite Mine	11	16.4		FALSE	FALSE	FALSE	FALSE	FALSE	FALSE	FALSE	FALSE	FALSE	FALSE	FALSE	FALSE	FALSE	FALSE	FALSE	FALSE	FALSE	FALSE	FALSE	FALSE	FALSE	FALSE	FALSE	FALSE	FALSE	FALSE	FALSE	FALSE	FALSE	FALSE	FALSE	FALSE	FALSE	FALSE	FALSE	FALSE	FALSE	FALSE	FALSE	FALSE	FALSE	FALSE	FALSE	FALSE	FALSE
718	Hambach Lignite Mine	11	16.4		FALSE	FALSE	FALSE	FALSE	FALSE	FALSE	FALSE	FALSE	FALSE	FALSE	FALSE	FALSE	FALSE	FALSE	FALSE	FALSE	FALSE	FALSE	FALSE	FALSE	FALSE	FALSE	FALSE	FALSE	FALSE	FALSE	FALSE	FALSE	FALSE	FALSE	FALSE	FALSE	FALSE	FALSE	FALSE	FALSE	FALSE	FALSE	FALSE	FALSE	FALSE	FALSE	FALSE	FALSE	FALSE
719	Hambach Lignite Mine	11	16.4		FALSE	FALSE	FALSE	FALSE	FALSE	FALSE	FALSE	FALSE	FALSE	FALSE	FALSE	FALSE	FALSE	FALSE	FALSE	FALSE	FALSE	FALSE	FALSE	FALSE	FALSE	FALSE	FALSE	FALSE	FALSE	FALSE	FALSE	FALSE	FALSE	FALSE	FALSE	FALSE	FALSE	FALSE	FALSE	FALSE	FALSE	FALSE	FALSE	FALSE	FALSE	FALSE	FALSE	FALSE	FALSE
720	Zukunft Mine 7A	5.3	11		FALSE	FALSE	FALSE	FALSE	FALSE	FALSE	FALSE	FALSE	FALSE	FALSE	FALSE	FALSE	FALSE	1	1	1	1	1	1	1	1	1	1	1	1	1	1	1	1	1	1	1	1	1	1	1	1	1	1	1	1	1	1	1	1
725	Crveni_Breg_Grocka	6	9		FALSE	FALSE	FALSE	FALSE	FALSE	FALSE	FALSE	FALSE	FALSE	FALSE	FALSE	FALSE	FALSE	FALSE	FALSE	FALSE	FALSE	FALSE	FALSE	FALSE	1	1	1	1	1	1	1	1	1	1	1	1	1	1	1	1	1	1	1	1	1	1	1	1	1
726	Osojna (Kladovo)	6	9		FALSE	FALSE	FALSE	FALSE	FALSE	FALSE	FALSE	FALSE	FALSE	FALSE	FALSE	FALSE	FALSE	FALSE	FALSE	FALSE	FALSE	FALSE	FALSE	FALSE	1	1	1	1	1	1	1	1	1	1	1	1	1	1	1	1	1	1	1	1	1	1	1	1	1
727	Nenana Coalfield	8	11.3		FALSE	FALSE	FALSE	FALSE	FALSE	FALSE	FALSE	FALSE	FALSE	FALSE	FALSE	FALSE	FALSE	FALSE	FALSE	FALSE	FALSE	FALSE	FALSE	FALSE	FALSE	FALSE	FALSE	FALSE	FALSE	FALSE	FALSE	FALSE	FALSE	FALSE	FALSE	FALSE	FALSE	FALSE	FALSE	FALSE	FALSE	FALSE	FALSE	FALSE	1	1	1	1	1
728	Cook Inlet	7	7		FALSE	FALSE	FALSE	FALSE	FALSE	FALSE	FALSE	FALSE	FALSE	FALSE	FALSE	FALSE	FALSE	FALSE	FALSE	FALSE	FALSE	FALSE	FALSE	FALSE	FALSE	FALSE	FALSE	FALSE	FALSE	FALSE	FALSE	FALSE	FALSE	FALSE	1	FALSE	FALSE	FALSE	FALSE	FALSE	FALSE	FALSE	FALSE	FALSE	FALSE	FALSE	FALSE	FALSE	FALSE
729	Faraday	11	12		FALSE	FALSE	FALSE	FALSE	FALSE	FALSE	FALSE	FALSE	FALSE	FALSE	FALSE	FALSE	FALSE	FALSE	FALSE	FALSE	FALSE	FALSE	FALSE	FALSE	FALSE	FALSE	FALSE	FALSE	FALSE	FALSE	FALSE	FALSE	FALSE	FALSE	FALSE	FALSE	FALSE	FALSE	FALSE	FALSE	FALSE	FALSE	FALSE	FALSE	FALSE	FALSE	FALSE	FALSE	FALSE
730	Middle Ellensburg	10	10		FALSE	FALSE	FALSE	FALSE	FALSE	FALSE	FALSE	FALSE	FALSE	FALSE	FALSE	FALSE	FALSE	FALSE	FALSE	FALSE	FALSE	FALSE	FALSE	FALSE	FALSE	FALSE	FALSE	FALSE	FALSE	FALSE	FALSE	FALSE	FALSE	FALSE	FALSE	FALSE	FALSE	FALSE	FALSE	FALSE	FALSE	FALSE	FALSE	FALSE	FALSE	FALSE	FALSE	FALSE	FALSE
731	Troutdale	10	10		FALSE	FALSE	FALSE	FALSE	FALSE	FALSE	FALSE	FALSE	FALSE	FALSE	FALSE	FALSE	FALSE	FALSE	FALSE	FALSE	FALSE	FALSE	FALSE	FALSE	FALSE	FALSE	FALSE	FALSE	FALSE	FALSE	FALSE	FALSE	FALSE	FALSE	FALSE	FALSE	FALSE	FALSE	FALSE	FALSE	FALSE	FALSE	FALSE	FALSE	FALSE	FALSE	FALSE	FALSE	FALSE
732	Weyerhauser	11	12		FALSE	FALSE	FALSE	FALSE	FALSE	FALSE	FALSE	FALSE	FALSE	FALSE	FALSE	FALSE	FALSE	FALSE	FALSE	FALSE	FALSE	FALSE	FALSE	FALSE	FALSE	FALSE	FALSE	FALSE	FALSE	FALSE	FALSE	FALSE	FALSE	FALSE	FALSE	FALSE	FALSE	FALSE	FALSE	FALSE	FALSE	FALSE	FALSE	FALSE	FALSE	FALSE	FALSE	FALSE	FALSE
734	Lerch	9.5	11		FALSE	FALSE	FALSE	FALSE	FALSE	FALSE	FALSE	FALSE	FALSE	FALSE	FALSE	FALSE	FALSE	FALSE	FALSE	FALSE	FALSE	FALSE	FALSE	FALSE	FALSE	FALSE	FALSE	FALSE	FALSE	FALSE	FALSE	FALSE	FALSE	FALSE	FALSE	FALSE	FALSE	FALSE	FALSE	FALSE	FALSE	FALSE	FALSE	FALSE	FALSE	FALSE	FALSE	FALSE	FALSE
735	Büyük Menderes Region	10	13		FALSE	FALSE	FALSE	FALSE	FALSE	FALSE	FALSE	FALSE	FALSE	FALSE	FALSE	FALSE	FALSE	FALSE	FALSE	FALSE	FALSE	FALSE	FALSE	FALSE	FALSE	FALSE	FALSE	FALSE	FALSE	FALSE	FALSE	FALSE	FALSE	FALSE	FALSE	FALSE	FALSE	FALSE	FALSE	FALSE	FALSE	FALSE	FALSE	FALSE	FALSE	FALSE	FALSE	FALSE	FALSE
736	Hrazdan_1	10	13		FALSE	FALSE	FALSE	FALSE	FALSE	FALSE	FALSE	FALSE	FALSE	FALSE	FALSE	FALSE	FALSE	FALSE	FALSE	FALSE	FALSE	FALSE	FALSE	FALSE	FALSE	FALSE	FALSE	FALSE	FALSE	FALSE	FALSE	FALSE	FALSE	FALSE	FALSE	FALSE	FALSE	FALSE	FALSE	FALSE	FALSE	FALSE	FALSE	FALSE	FALSE	FALSE	FALSE	FALSE	FALSE
737	Hrazdan_2	10	13		FALSE	FALSE	FALSE	FALSE	FALSE	FALSE	FALSE	FALSE	FALSE	FALSE	FALSE	FALSE	FALSE	FALSE	FALSE	FALSE	FALSE	FALSE	FALSE	FALSE	FALSE	FALSE	FALSE	FALSE	FALSE	FALSE	FALSE	FALSE	FALSE	FALSE	FALSE	FALSE	FALSE	FALSE	FALSE	FALSE	FALSE	FALSE	FALSE	FALSE	FALSE	FALSE	FALSE	FALSE	FALSE
738	Mangyus	10	13		FALSE	FALSE	FALSE	FALSE	FALSE	FALSE	FALSE	FALSE	FALSE	FALSE	FALSE	FALSE	FALSE	FALSE	FALSE	FALSE	FALSE	FALSE	FALSE	FALSE	FALSE	FALSE	FALSE	FALSE	FALSE	FALSE	FALSE	FALSE	FALSE	FALSE	FALSE	FALSE	FALSE	FALSE	FALSE	FALSE	FALSE	FALSE	FALSE	FALSE	FALSE	FALSE	FALSE	FALSE	FALSE
739	Mayisyan	5.3	7.1		FALSE	FALSE	FALSE	FALSE	FALSE	FALSE	FALSE	FALSE	FALSE	FALSE	FALSE	FALSE	FALSE	1	1	1	1	1	1	1	1	1	1	1	1	1	1	1	1	1	1	1	FALSE	FALSE	FALSE	FALSE	FALSE	FALSE	FALSE	FALSE	FALSE	FALSE	FALSE	FALSE	FALSE
740	Nakhichevan_1	10	13		FALSE	FALSE	FALSE	FALSE	FALSE	FALSE	FALSE	FALSE	FALSE	FALSE	FALSE	FALSE	FALSE	FALSE	FALSE	FALSE	FALSE	FALSE	FALSE	FALSE	FALSE	FALSE	FALSE	FALSE	FALSE	FALSE	FALSE	FALSE	FALSE	FALSE	FALSE	FALSE	FALSE	FALSE	FALSE	FALSE	FALSE	FALSE	FALSE	FALSE	FALSE	FALSE	FALSE	FALSE	FALSE
741	Burgos	8.7	11.1		FALSE	FALSE	FALSE	FALSE	FALSE	FALSE	FALSE	FALSE	FALSE	FALSE	FALSE	FALSE	FALSE	FALSE	FALSE	FALSE	FALSE	FALSE	FALSE	FALSE	FALSE	FALSE	FALSE	FALSE	FALSE	FALSE	FALSE	FALSE	FALSE	FALSE	FALSE	FALSE	FALSE	FALSE	FALSE	FALSE	FALSE	FALSE	FALSE	FALSE	FALSE	FALSE	FALSE	FALSE	FALSE
742	Massenhausen	9.7	11.1		FALSE	FALSE	FALSE	FALSE	FALSE	FALSE	FALSE	FALSE	FALSE	FALSE	FALSE	FALSE	FALSE	FALSE	FALSE	FALSE	FALSE	FALSE	FALSE	FALSE	FALSE	FALSE	FALSE	FALSE	FALSE	FALSE	FALSE	FALSE	FALSE	FALSE	FALSE	FALSE	FALSE	FALSE	FALSE	FALSE	FALSE	FALSE	FALSE	FALSE	FALSE	FALSE	FALSE	FALSE	FALSE
743	Povoa	8.7	11.6		FALSE	FALSE	FALSE	FALSE	FALSE	FALSE	FALSE	FALSE	FALSE	FALSE	FALSE	FALSE	FALSE	FALSE	FALSE	FALSE	FALSE	FALSE	FALSE	FALSE	FALSE	FALSE	FALSE	FALSE	FALSE	FALSE	FALSE	FALSE	FALSE	FALSE	FALSE	FALSE	FALSE	FALSE	FALSE	FALSE	FALSE	FALSE	FALSE	FALSE	FALSE	FALSE	FALSE	FALSE	FALSE
744	Rudabánya	9.7	11.1		FALSE	FALSE	FALSE	FALSE	FALSE	FALSE	FALSE	FALSE	FALSE	FALSE	FALSE	FALSE	FALSE	FALSE	FALSE	FALSE	FALSE	FALSE	FALSE	FALSE	FALSE	FALSE	FALSE	FALSE	FALSE	FALSE	FALSE	FALSE	FALSE	FALSE	FALSE	FALSE	FALSE	FALSE	FALSE	FALSE	FALSE	FALSE	FALSE	FALSE	FALSE	FALSE	FALSE	FALSE	FALSE
745	Samos	11.2	11.2		FALSE	FALSE	FALSE	FALSE	FALSE	FALSE	FALSE	FALSE	FALSE	FALSE	FALSE	FALSE	FALSE	FALSE	FALSE	FALSE	FALSE	FALSE	FALSE	FALSE	FALSE	FALSE	FALSE	FALSE	FALSE	FALSE	FALSE	FALSE	FALSE	FALSE	FALSE	FALSE	FALSE	FALSE	FALSE	FALSE	FALSE	FALSE	FALSE	FALSE	FALSE	FALSE	FALSE	FALSE	FALSE
746	Sé	7.3	11.6		FALSE	FALSE	FALSE	FALSE	FALSE	FALSE	FALSE	FALSE	FALSE	FALSE	FALSE	FALSE	FALSE	FALSE	FALSE	FALSE	FALSE	FALSE	FALSE	FALSE	FALSE	FALSE	FALSE	FALSE	FALSE	FALSE	FALSE	FALSE	FALSE	FALSE	FALSE	FALSE	FALSE	1	1	1	1	1	1	1	1	1	1	1	1
747	Sivas Gemerek	7.3	11.6		FALSE	FALSE	FALSE	FALSE	FALSE	FALSE	FALSE	FALSE	FALSE	FALSE	FALSE	FALSE	FALSE	FALSE	FALSE	FALSE	FALSE	FALSE	FALSE	FALSE	FALSE	FALSE	FALSE	FALSE	FALSE	FALSE	FALSE	FALSE	FALSE	FALSE	FALSE	FALSE	FALSE	1	1	1	1	1	1	1	1	1	1	1	1
748	Wörth	7.3	11.6		FALSE	FALSE	FALSE	FALSE	FALSE	FALSE	FALSE	FALSE	FALSE	FALSE	FALSE	FALSE	FALSE	FALSE	FALSE	FALSE	FALSE	FALSE	FALSE	FALSE	FALSE	FALSE	FALSE	FALSE	FALSE	FALSE	FALSE	FALSE	FALSE	FALSE	FALSE	FALSE	FALSE	1	1	1	1	1	1	1	1	1	1	1	1
749	Zukunft Mine 7A	8.5	10.3		FALSE	FALSE	FALSE	FALSE	FALSE	FALSE	FALSE	FALSE	FALSE	FALSE	FALSE	FALSE	FALSE	FALSE	FALSE	FALSE	FALSE	FALSE	FALSE	FALSE	FALSE	FALSE	FALSE	FALSE	FALSE	FALSE	FALSE	FALSE	FALSE	FALSE	FALSE	FALSE	FALSE	FALSE	FALSE	FALSE	FALSE	FALSE	FALSE	FALSE	FALSE	FALSE	FALSE	FALSE	FALSE
750	Felsotarkany	10	13		FALSE	FALSE	FALSE	FALSE	FALSE	FALSE	FALSE	FALSE	FALSE	FALSE	FALSE	FALSE	FALSE	FALSE	FALSE	FALSE	FALSE	FALSE	FALSE	FALSE	FALSE	FALSE	FALSE	FALSE	FALSE	FALSE	FALSE	FALSE	FALSE	FALSE	FALSE	FALSE	FALSE	FALSE	FALSE	FALSE	FALSE	FALSE	FALSE	FALSE	FALSE	FALSE	FALSE	FALSE	FALSE
751	Cholodnaja	7.1	11.5		FALSE	FALSE	FALSE	FALSE	FALSE	FALSE	FALSE	FALSE	FALSE	FALSE	FALSE	FALSE	FALSE	FALSE	FALSE	FALSE	FALSE	FALSE	FALSE	FALSE	FALSE	FALSE	FALSE	FALSE	FALSE	FALSE	FALSE	FALSE	FALSE	FALSE	FALSE	1	1	1	1	1	1	1	1	1	1	1	1	1	1
752	Ejska	7.1	11.5		FALSE	FALSE	FALSE	FALSE	FALSE	FALSE	FALSE	FALSE	FALSE	FALSE	FALSE	FALSE	FALSE	FALSE	FALSE	FALSE	FALSE	FALSE	FALSE	FALSE	FALSE	FALSE	FALSE	FALSE	FALSE	FALSE	FALSE	FALSE	FALSE	FALSE	FALSE	1	1	1	1	1	1	1	1	1	1	1	1	1	1
753	Mataschen	7.3	11.6		FALSE	FALSE	FALSE	FALSE	FALSE	FALSE	FALSE	FALSE	FALSE	FALSE	FALSE	FALSE	FALSE	FALSE	FALSE	FALSE	FALSE	FALSE	FALSE	FALSE	FALSE	FALSE	FALSE	FALSE	FALSE	FALSE	FALSE	FALSE	FALSE	FALSE	FALSE	FALSE	FALSE	1	1	1	1	1	1	1	1	1	1	1	1
754	Hammerschmiede	7.3	11.6		FALSE	FALSE	FALSE	FALSE	FALSE	FALSE	FALSE	FALSE	FALSE	FALSE	FALSE	FALSE	FALSE	FALSE	FALSE	FALSE	FALSE	FALSE	FALSE	FALSE	FALSE	FALSE	FALSE	FALSE	FALSE	FALSE	FALSE	FALSE	FALSE	FALSE	FALSE	FALSE	FALSE	1	1	1	1	1	1	1	1	1	1	1	1
755	Belchatow 1	7.3	11.6		FALSE	FALSE	FALSE	FALSE	FALSE	FALSE	FALSE	FALSE	FALSE	FALSE	FALSE	FALSE	FALSE	FALSE	FALSE	FALSE	FALSE	FALSE	FALSE	FALSE	FALSE	FALSE	FALSE	FALSE	FALSE	FALSE	FALSE	FALSE	FALSE	FALSE	FALSE	FALSE	FALSE	1	1	1	1	1	1	1	1	1	1	1	1
756	Belchatow 2	7.3	11.6		FALSE	FALSE	FALSE	FALSE	FALSE	FALSE	FALSE	FALSE	FALSE	FALSE	FALSE	FALSE	FALSE	FALSE	FALSE	FALSE	FALSE	FALSE	FALSE	FALSE	FALSE	FALSE	FALSE	FALSE	FALSE	FALSE	FALSE	FALSE	FALSE	FALSE	FALSE	FALSE	FALSE	1	1	1	1	1	1	1	1	1	1	1	1
757	Hambach Lignite Mine	7.1	11.5		FALSE	FALSE	FALSE	FALSE	FALSE	FALSE	FALSE	FALSE	FALSE	FALSE	FALSE	FALSE	FALSE	FALSE	FALSE	FALSE	FALSE	FALSE	FALSE	FALSE	FALSE	FALSE	FALSE	FALSE	FALSE	FALSE	FALSE	FALSE	FALSE	FALSE	FALSE	1	1	1	1	1	1	1	1	1	1	1	1	1	1
758	Vösendorf	7.1	11.5		FALSE	FALSE	FALSE	FALSE	FALSE	FALSE	FALSE	FALSE	FALSE	FALSE	FALSE	FALSE	FALSE	FALSE	FALSE	FALSE	FALSE	FALSE	FALSE	FALSE	FALSE	FALSE	FALSE	FALSE	FALSE	FALSE	FALSE	FALSE	FALSE	FALSE	FALSE	1	1	1	1	1	1	1	1	1	1	1	1	1	1
759	Kirşehir	11	13		FALSE	FALSE	FALSE	FALSE	FALSE	FALSE	FALSE	FALSE	FALSE	FALSE	FALSE	FALSE	FALSE	FALSE	FALSE	FALSE	FALSE	FALSE	FALSE	FALSE	FALSE	FALSE	FALSE	FALSE	FALSE	FALSE	FALSE	FALSE	FALSE	FALSE	FALSE	FALSE	FALSE	FALSE	FALSE	FALSE	FALSE	FALSE	FALSE	FALSE	FALSE	FALSE	FALSE	FALSE	FALSE
760	Makrilia	7.7	8.6		FALSE	FALSE	FALSE	FALSE	FALSE	FALSE	FALSE	FALSE	FALSE	FALSE	FALSE	FALSE	FALSE	FALSE	FALSE	FALSE	FALSE	FALSE	FALSE	FALSE	FALSE	FALSE	FALSE	FALSE	FALSE	FALSE	FALSE	FALSE	FALSE	FALSE	FALSE	FALSE	FALSE	FALSE	FALSE	FALSE	FALSE	1	1	1	1	1	1	1	1
761	Vegora	4.9	7.3		FALSE	FALSE	FALSE	FALSE	FALSE	FALSE	FALSE	FALSE	FALSE	2	2	2	2	1	1	1	1	1	1	1	1	1	1	1	1	1	1	1	1	1	1	1	1	1	FALSE	FALSE	FALSE	FALSE	FALSE	FALSE	FALSE	FALSE	FALSE	FALSE	FALSE
762	Sofia Basin	9.5	13.5		FALSE	FALSE	FALSE	FALSE	FALSE	FALSE	FALSE	FALSE	FALSE	FALSE	FALSE	FALSE	FALSE	FALSE	FALSE	FALSE	FALSE	FALSE	FALSE	FALSE	FALSE	FALSE	FALSE	FALSE	FALSE	FALSE	FALSE	FALSE	FALSE	FALSE	FALSE	FALSE	FALSE	FALSE	FALSE	FALSE	FALSE	FALSE	FALSE	FALSE	FALSE	FALSE	FALSE	FALSE	FALSE
763	Borsec	5.3	6		FALSE	FALSE	FALSE	FALSE	FALSE	FALSE	FALSE	FALSE	FALSE	FALSE	FALSE	FALSE	FALSE	1	1	1	1	1	1	1	1	FALSE	FALSE	FALSE	FALSE	FALSE	FALSE	FALSE	FALSE	FALSE	FALSE	FALSE	FALSE	FALSE	FALSE	FALSE	FALSE	FALSE	FALSE	FALSE	FALSE	FALSE	FALSE	FALSE	FALSE
764	Staniantsi Basin	5.3	6.5		FALSE	FALSE	FALSE	FALSE	FALSE	FALSE	FALSE	FALSE	FALSE	FALSE	FALSE	FALSE	FALSE	1	1	1	1	1	1	1	1	1	1	1	1	1	FALSE	FALSE	FALSE	FALSE	FALSE	FALSE	FALSE	FALSE	FALSE	FALSE	FALSE	FALSE	FALSE	FALSE	FALSE	FALSE	FALSE	FALSE	FALSE
765	Staniantsi Basin	5.3	6.5		FALSE	FALSE	FALSE	FALSE	FALSE	FALSE	FALSE	FALSE	FALSE	FALSE	FALSE	FALSE	FALSE	1	1	1	1	1	1	1	1	1	1	1	1	1	FALSE	FALSE	FALSE	FALSE	FALSE	FALSE	FALSE	FALSE	FALSE	FALSE	FALSE	FALSE	FALSE	FALSE	FALSE	FALSE	FALSE	FALSE	FALSE
766	Staniantsi Basin	5.3	6.5		FALSE	FALSE	FALSE	FALSE	FALSE	FALSE	FALSE	FALSE	FALSE	FALSE	FALSE	FALSE	FALSE	1	1	1	1	1	1	1	1	1	1	1	1	1	FALSE	FALSE	FALSE	FALSE	FALSE	FALSE	FALSE	FALSE	FALSE	FALSE	FALSE	FALSE	FALSE	FALSE	FALSE	FALSE	FALSE	FALSE	FALSE
767	Staniantsi Basin	5.3	6.5		FALSE	FALSE	FALSE	FALSE	FALSE	FALSE	FALSE	FALSE	FALSE	FALSE	FALSE	FALSE	FALSE	1	1	1	1	1	1	1	1	1	1	1	1	1	FALSE	FALSE	FALSE	FALSE	FALSE	FALSE	FALSE	FALSE	FALSE	FALSE	FALSE	FALSE	FALSE	FALSE	FALSE	FALSE	FALSE	FALSE	FALSE
768	Staniantsi Basin	5.3	6.5		FALSE	FALSE	FALSE	FALSE	FALSE	FALSE	FALSE	FALSE	FALSE	FALSE	FALSE	FALSE	FALSE	1	1	1	1	1	1	1	1	1	1	1	1	1	FALSE	FALSE	FALSE	FALSE	FALSE	FALSE	FALSE	FALSE	FALSE	FALSE	FALSE	FALSE	FALSE	FALSE	FALSE	FALSE	FALSE	FALSE	FALSE
769	Staniantsi Basin	5.3	6.5		FALSE	FALSE	FALSE	FALSE	FALSE	FALSE	FALSE	FALSE	FALSE	FALSE	FALSE	FALSE	FALSE	1	1	1	1	1	1	1	1	1	1	1	1	1	FALSE	FALSE	FALSE	FALSE	FALSE	FALSE	FALSE	FALSE	FALSE	FALSE	FALSE	FALSE	FALSE	FALSE	FALSE	FALSE	FALSE	FALSE	FALSE
770	Staniantsi Basin	5.3	6.5		FALSE	FALSE	FALSE	FALSE	FALSE	FALSE	FALSE	FALSE	FALSE	FALSE	FALSE	FALSE	FALSE	1	1	1	1	1	1	1	1	1	1	1	1	1	FALSE	FALSE	FALSE	FALSE	FALSE	FALSE	FALSE	FALSE	FALSE	FALSE	FALSE	FALSE	FALSE	FALSE	FALSE	FALSE	FALSE	FALSE	FALSE
771	Staniantsi Basin	5.3	6.5		FALSE	FALSE	FALSE	FALSE	FALSE	FALSE	FALSE	FALSE	FALSE	FALSE	FALSE	FALSE	FALSE	1	1	1	1	1	1	1	1	1	1	1	1	1	FALSE	FALSE	FALSE	FALSE	FALSE	FALSE	FALSE	FALSE	FALSE	FALSE	FALSE	FALSE	FALSE	FALSE	FALSE	FALSE	FALSE	FALSE	FALSE
772	Staniantsi Basin	5.3	6.5		FALSE	FALSE	FALSE	FALSE	FALSE	FALSE	FALSE	FALSE	FALSE	FALSE	FALSE	FALSE	FALSE	1	1	1	1	1	1	1	1	1	1	1	1	1	FALSE	FALSE	FALSE	FALSE	FALSE	FALSE	FALSE	FALSE	FALSE	FALSE	FALSE	FALSE	FALSE	FALSE	FALSE	FALSE	FALSE	FALSE	FALSE
773	Staniantsi Basin	5.3	6.5		FALSE	FALSE	FALSE	FALSE	FALSE	FALSE	FALSE	FALSE	FALSE	FALSE	FALSE	FALSE	FALSE	1	1	1	1	1	1	1	1	1	1	1	1	1	FALSE	FALSE	FALSE	FALSE	FALSE	FALSE	FALSE	FALSE	FALSE	FALSE	FALSE	FALSE	FALSE	FALSE	FALSE	FALSE	FALSE	FALSE	FALSE
774	Staniantsi Basin	5.3	6.5		FALSE	FALSE	FALSE	FALSE	FALSE	FALSE	FALSE	FALSE	FALSE	FALSE	FALSE	FALSE	FALSE	1	1	1	1	1	1	1	1	1	1	1	1	1	FALSE	FALSE	FALSE	FALSE	FALSE	FALSE	FALSE	FALSE	FALSE	FALSE	FALSE	FALSE	FALSE	FALSE	FALSE	FALSE	FALSE	FALSE	FALSE
775	Staniantsi Basin	5.3	6.5		FALSE	FALSE	FALSE	FALSE	FALSE	FALSE	FALSE	FALSE	FALSE	FALSE	FALSE	FALSE	FALSE	1	1	1	1	1	1	1	1	1	1	1	1	1	FALSE	FALSE	FALSE	FALSE	FALSE	FALSE	FALSE	FALSE	FALSE	FALSE	FALSE	FALSE	FALSE	FALSE	FALSE	FALSE	FALSE	FALSE	FALSE
776	Staniantsi Basin	5.3	6.5		FALSE	FALSE	FALSE	FALSE	FALSE	FALSE	FALSE	FALSE	FALSE	FALSE	FALSE	FALSE	FALSE	1	1	1	1	1	1	1	1	1	1	1	1	1	FALSE	FALSE	FALSE	FALSE	FALSE	FALSE	FALSE	FALSE	FALSE	FALSE	FALSE	FALSE	FALSE	FALSE	FALSE	FALSE	FALSE	FALSE	FALSE
777	Staniantsi Basin	5.3	6.5		FALSE	FALSE	FALSE	FALSE	FALSE	FALSE	FALSE	FALSE	FALSE	FALSE	FALSE	FALSE	FALSE	1	1	1	1	1	1	1	1	1	1	1	1	1	FALSE	FALSE	FALSE	FALSE	FALSE	FALSE	FALSE	FALSE	FALSE	FALSE	FALSE	FALSE	FALSE	FALSE	FALSE	FALSE	FALSE	FALSE	FALSE
778	Staniantsi Basin	5.3	6.5		FALSE	FALSE	FALSE	FALSE	FALSE	FALSE	FALSE	FALSE	FALSE	FALSE	FALSE	FALSE	FALSE	1	1	1	1	1	1	1	1	1	1	1	1	1	FALSE	FALSE	FALSE	FALSE	FALSE	FALSE	FALSE	FALSE	FALSE	FALSE	FALSE	FALSE	FALSE	FALSE	FALSE	FALSE	FALSE	FALSE	FALSE
779	Staniantsi Basin	5.3	6.5		FALSE	FALSE	FALSE	FALSE	FALSE	FALSE	FALSE	FALSE	FALSE	FALSE	FALSE	FALSE	FALSE	1	1	1	1	1	1	1	1	1	1	1	1	1	FALSE	FALSE	FALSE	FALSE	FALSE	FALSE	FALSE	FALSE	FALSE	FALSE	FALSE	FALSE	FALSE	FALSE	FALSE	FALSE	FALSE	FALSE	FALSE
780	Staniantsi Basin	5.3	6.5		FALSE	FALSE	FALSE	FALSE	FALSE	FALSE	FALSE	FALSE	FALSE	FALSE	FALSE	FALSE	FALSE	1	1	1	1	1	1	1	1	1	1	1	1	1	FALSE	FALSE	FALSE	FALSE	FALSE	FALSE	FALSE	FALSE	FALSE	FALSE	FALSE	FALSE	FALSE	FALSE	FALSE	FALSE	FALSE	FALSE	FALSE
781	Staniantsi Basin	5.3	6.5		FALSE	FALSE	FALSE	FALSE	FALSE	FALSE	FALSE	FALSE	FALSE	FALSE	FALSE	FALSE	FALSE	1	1	1	1	1	1	1	1	1	1	1	1	1	FALSE	FALSE	FALSE	FALSE	FALSE	FALSE	FALSE	FALSE	FALSE	FALSE	FALSE	FALSE	FALSE	FALSE	FALSE	FALSE	FALSE	FALSE	FALSE
782	Staniantsi Basin	5.3	6.5		#REF!	#REF!	#REF!	#REF!	#REF!	#REF!	#REF!	#REF!	#REF!	#REF!	#REF!	#REF!	#REF!	1	1	1	1	1	1	1	1	1	1	1	1	1	#REF!	#REF!	#REF!	#REF!	#REF!	#REF!	#REF!	#REF!	#REF!	#REF!	#REF!	#REF!	#REF!	#REF!	#REF!	#REF!	#REF!	#REF!	#REF!
783	Staniantsi Basin	5.3	6.5		FALSE	FALSE	FALSE	FALSE	FALSE	FALSE	FALSE	FALSE	FALSE	FALSE	FALSE	FALSE	FALSE	1	1	1	1	1	1	1	1	1	1	1	1	1	FALSE	FALSE	FALSE	FALSE	FALSE	FALSE	FALSE	FALSE	FALSE	FALSE	FALSE	FALSE	FALSE	FALSE	FALSE	FALSE	FALSE	FALSE	FALSE
784	Staniantsi Basin	5.3	6.5		FALSE	FALSE	FALSE	FALSE	FALSE	FALSE	FALSE	FALSE	FALSE	FALSE	FALSE	FALSE	FALSE	1	1	1	1	1	1	1	1	1	1	1	1	1	FALSE	FALSE	FALSE	FALSE	FALSE	FALSE	FALSE	FALSE	FALSE	FALSE	FALSE	FALSE	FALSE	FALSE	FALSE	FALSE	FALSE	FALSE	FALSE
785	Staniantsi Basin	5.3	6.5		FALSE	FALSE	FALSE	FALSE	FALSE	FALSE	FALSE	FALSE	FALSE	FALSE	FALSE	FALSE	FALSE	1	1	1	1	1	1	1	1	1	1	1	1	1	FALSE	FALSE	FALSE	FALSE	FALSE	FALSE	FALSE	FALSE	FALSE	FALSE	FALSE	FALSE	FALSE	FALSE	FALSE	FALSE	FALSE	FALSE	FALSE
786	Staniantsi Basin	5.3	6.5		FALSE	FALSE	FALSE	FALSE	FALSE	FALSE	FALSE	FALSE	FALSE	FALSE	FALSE	FALSE	FALSE	1	1	1	1	1	1	1	1	1	1	1	1	1	FALSE	FALSE	FALSE	FALSE	FALSE	FALSE	FALSE	FALSE	FALSE	FALSE	FALSE	FALSE	FALSE	FALSE	FALSE	FALSE	FALSE	FALSE	FALSE
787	Staniantsi Basin	5.3	6.5		FALSE	FALSE	FALSE	FALSE	FALSE	FALSE	FALSE	FALSE	FALSE	FALSE	FALSE	FALSE	FALSE	1	1	1	1	1	1	1	1	1	1	1	1	1	FALSE	FALSE	FALSE	FALSE	FALSE	FALSE	FALSE	FALSE	FALSE	FALSE	FALSE	FALSE	FALSE	FALSE	FALSE	FALSE	FALSE	FALSE	FALSE
788	Staniantsi Basin	5.3	6.5		FALSE	FALSE	FALSE	FALSE	FALSE	FALSE	FALSE	FALSE	FALSE	FALSE	FALSE	FALSE	FALSE	1	1	1	1	1	1	1	1	1	1	1	1	1	FALSE	FALSE	FALSE	FALSE	FALSE	FALSE	FALSE	FALSE	FALSE	FALSE	FALSE	FALSE	FALSE	FALSE	FALSE	FALSE	FALSE	FALSE	FALSE
789	Staniantsi Basin	5.3	6.5		FALSE	FALSE	FALSE	FALSE	FALSE	FALSE	FALSE	FALSE	FALSE	FALSE	FALSE	FALSE	FALSE	1	1	1	1	1	1	1	1	1	1	1	1	1	FALSE	FALSE	FALSE	FALSE	FALSE	FALSE	FALSE	FALSE	FALSE	FALSE	FALSE	FALSE	FALSE	FALSE	FALSE	FALSE	FALSE	FALSE	FALSE
790	Staniantsi Basin	5.3	6.5		FALSE	FALSE	FALSE	FALSE	FALSE	FALSE	FALSE	FALSE	FALSE	FALSE	FALSE	FALSE	FALSE	1	1	1	1	1	1	1	1	1	1	1	1	1	FALSE	FALSE	FALSE	FALSE	FALSE	FALSE	FALSE	FALSE	FALSE	FALSE	FALSE	FALSE	FALSE	FALSE	FALSE	FALSE	FALSE	FALSE	FALSE
791	Staniantsi Basin	5.3	6.5		FALSE	FALSE	FALSE	FALSE	FALSE	FALSE	FALSE	FALSE	FALSE	FALSE	FALSE	FALSE	FALSE	1	1	1	1	1	1	1	1	1	1	1	1	1	FALSE	FALSE	FALSE	FALSE	FALSE	FALSE	FALSE	FALSE	FALSE	FALSE	FALSE	FALSE	FALSE	FALSE	FALSE	FALSE	FALSE	FALSE	FALSE
792	Staniantsi Basin	5.3	6.5		FALSE	FALSE	FALSE	FALSE	FALSE	FALSE	FALSE	FALSE	FALSE	FALSE	FALSE	FALSE	FALSE	1	1	1	1	1	1	1	1	1	1	1	1	1	FALSE	FALSE	FALSE	FALSE	FALSE	FALSE	FALSE	FALSE	FALSE	FALSE	FALSE	FALSE	FALSE	FALSE	FALSE	FALSE	FALSE	FALSE	FALSE
[truncated: 412 more rows]
[truncated: 81 more columns]

## Sheet: References
Short Ref	Long Ref
[truncated: 100 more rows]
